# Supplementary material
Source: publisher figshare collection journal article supplement (https://gsajournals.figshare.com/ndownloader/files/15112082)
Supplement: Supplementary file 1 [file 15112082]

## Sheet: Nud1 Process
GO Term	Description	P-value	FDR q-value	Enrichment	N	B	n	b	Genes
GO:0016070	RNA metabolic process	8.82e-16	4.3e-12	1.48	4095	969	899	315	[NSA2 - nsa2p, ECM16 - ecm16p, TFA2 - tfa2p, LAS1 - las1p, SAP185 - sap185p, SNF6 - snf6p, HAP5 - hap5p, RPS16A - ribosomal 40s subunit protein s16a, NOP56 - nop56p, UTP10 - utp10p, RPA43 - rpa43p, LSM4 - lsm4p, STO1 - sto1p, SUT1 - sut1p, MED2 - med2p, PRP3 - prp3p, HSH49 - hsh49p, RRP7 - rrp7p, SKI3 - ski3p, SNF4 - snf4p, SPT15 - spt15p, RPB4 - rpb4p, TAF6 - taf6p, NSA1 - nsa1p, NFS1 - nfs1p, Y…
GO:1903047	mitotic cell cycle process	8.57e-14	2.09e-10	4.89	4095	276	97	32	[MCM2 - mcm2p, SMC2 - condensin subunit smc2, SPC97 - spc97p, KIP3 - tubulin-dependent atpase kip3, SAP185 - sap185p, MTW1 - mtw1p, CDC12 - septin cdc12, CDC15 - cdc15p, STU2 - stu2p, SAP155 - sap155p, TID3 - tid3p, CDC45 - cdc45p, NUF2 - nuf2p, THP1 - thp1p, SCM3 - scm3p, SFI1 - sfi1p, SPC105 - spc105p, KAR3 - kar3p, DSN1 - dsn1p, MCM21 - mcm21p, MET30 - met30p, CBF2 - cbf2p, CDC34 - scf e2 ubiq…
GO:0090304	nucleic acid metabolic process	1.15e-13	1.86e-10	1.4	4095	1162	899	356	[NSA2 - nsa2p, ECM16 - ecm16p, TFA2 - tfa2p, LAS1 - las1p, SAP185 - sap185p, SNF6 - snf6p, HAP5 - hap5p, MRC1 - mrc1p, RPS16A - ribosomal 40s subunit protein s16a, NOP56 - nop56p, UTP10 - utp10p, RPA43 - rpa43p, LSM4 - lsm4p, STO1 - sto1p, SUT1 - sut1p, MED2 - med2p, MLP1 - mlp1p, PRP3 - prp3p, HSH49 - hsh49p, RRP7 - rrp7p, SKI3 - ski3p, SNF4 - snf4p, SPT15 - spt15p, RPB4 - rpb4p, TAF6 - taf6p, N…
GO:0016072	rRNA metabolic process	1.56e-13	1.9e-10	2.04	4095	250	801	100	[ECM16 - ecm16p, NSA2 - nsa2p, DBP8 - atp-dependent rna helicase dbp8, LAS1 - las1p, FAF1 - faf1p, SNF6 - snf6p, RPS16A - ribosomal 40s subunit protein s16a, NOP56 - nop56p, UTP10 - utp10p, UTP14 - utp14p, RPA43 - rpa43p, LSM4 - lsm4p, NOB1 - nob1p, RPL3 - ribosomal 60s subunit protein l3, RPS6A - ribosomal 40s subunit protein s6a, RRP7 - rrp7p, NOG1 - nog1p, SPT15 - spt15p, NSA1 - nsa1p, YNL022C…
GO:0022613	ribonucleoprotein complex biogenesis	1.66e-13	1.61e-10	2.46	4095	182	658	72	[ECM16 - ecm16p, DBP8 - atp-dependent rna helicase dbp8, NSA2 - nsa2p, RPS0B - ribosomal 40s subunit protein s0b, FAF1 - faf1p, FCF2 - fcf2p, RRP8 - rrp8p, NOP16 - nop16p, NOP56 - nop56p, UTP10 - utp10p, UTP14 - utp14p, REI1 - rei1p, NUG1 - nug1p, RPA43 - rpa43p, SSF1 - ssf1p, RIA1 - ria1p, BRX1 - brx1p, RSA3 - rsa3p, NOP10 - nop10p, MRPL11 - mitochondrial 54s ribosomal protein yml11, RPS19B - ri…
GO:0042254	ribosome biogenesis	2.84e-13	2.31e-10	2.58	4095	157	658	65	[NSA2 - nsa2p, DBP8 - atp-dependent rna helicase dbp8, ECM16 - ecm16p, RPS0B - ribosomal 40s subunit protein s0b, FAF1 - faf1p, FCF2 - fcf2p, NOP16 - nop16p, NOP56 - nop56p, UTP10 - utp10p, UTP14 - utp14p, REI1 - rei1p, NUG1 - nug1p, RPA43 - rpa43p, SSF1 - ssf1p, RIA1 - ria1p, BRX1 - brx1p, RSA3 - rsa3p, RPS19B - ribosomal 40s subunit protein s19b, NOP10 - nop10p, MRPL11 - mitochondrial 54s ribos…
GO:0006396	RNA processing	9.62e-13	6.7e-10	1.73	4095	448	787	149	[DBP8 - atp-dependent rna helicase dbp8, ECM16 - ecm16p, NSA2 - nsa2p, FAF1 - faf1p, LAS1 - las1p, PRP42 - prp42p, SAP185 - sap185p, SNF6 - snf6p, PCF11 - pcf11p, RPS16A - ribosomal 40s subunit protein s16a, PFS2 - pfs2p, NOP56 - nop56p, UTP14 - utp14p, UTP10 - utp10p, LSM4 - lsm4p, STO1 - sto1p, NOB1 - nob1p, RPL3 - ribosomal 60s subunit protein l3, HSH49 - hsh49p, RPS6A - ribosomal 40s subunit …
GO:0034660	ncRNA metabolic process	1.04e-12	6.34e-10	1.77	4095	392	814	138	[DBP8 - atp-dependent rna helicase dbp8, ECM16 - ecm16p, NSA2 - nsa2p, FAF1 - faf1p, LAS1 - las1p, SAP185 - sap185p, SNF6 - snf6p, RPS16A - ribosomal 40s subunit protein s16a, NOP56 - nop56p, UTP14 - utp14p, UTP10 - utp10p, RPA43 - rpa43p, LSM4 - lsm4p, STO1 - sto1p, NOB1 - nob1p, RPL3 - ribosomal 60s subunit protein l3, RPS6A - ribosomal 40s subunit protein s6a, RRP7 - rrp7p, NOG1 - nog1p, SPT15…
GO:0006364	rRNA processing	2.1e-12	1.14e-09	2.11	4095	213	785	86	[RPS0B - ribosomal 40s subunit protein s0b, ECM16 - ecm16p, NSA2 - nsa2p, DBP8 - atp-dependent rna helicase dbp8, LAS1 - las1p, FAF1 - faf1p, POP8 - pop8p, FCF2 - fcf2p, SNF6 - snf6p, RRP1 - rrp1p, RRP8 - rrp8p, NOP16 - nop16p, RPS16A - ribosomal 40s subunit protein s16a, NOP56 - nop56p, UTP14 - utp14p, UTP10 - utp10p, NUG1 - nug1p, SSF1 - ssf1p, LSM8 - lsm8p, LSM4 - lsm4p, REX4 - rex4p, NOP10 - …
GO:0022402	cell cycle process	3.99e-12	1.95e-09	3.77	4095	425	92	36	[MCM2 - mcm2p, SMC2 - condensin subunit smc2, SPC97 - spc97p, KIP3 - tubulin-dependent atpase kip3, SAP185 - sap185p, CDC12 - septin cdc12, MTW1 - mtw1p, CDC15 - cdc15p, RFA2 - rfa2p, SPC29 - spc29p, STU2 - stu2p, TID3 - tid3p, SAP155 - sap155p, BBP1 - bbp1p, NUF2 - nuf2p, CDC45 - cdc45p, THP1 - thp1p, SCM3 - scm3p, OKP1 - okp1p, SFI1 - sfi1p, SPC105 - spc105p, KAR3 - kar3p, DSN1 - dsn1p, MET30 -…
GO:0034470	ncRNA processing	5.6e-11	2.48e-08	1.84	4095	306	785	108	[NSA2 - nsa2p, ECM16 - ecm16p, DBP8 - atp-dependent rna helicase dbp8, LAS1 - las1p, FAF1 - faf1p, SAP185 - sap185p, SNF6 - snf6p, RPS16A - ribosomal 40s subunit protein s16a, NOP56 - nop56p, UTP10 - utp10p, UTP14 - utp14p, LSM4 - lsm4p, STO1 - sto1p, NOB1 - nob1p, RPL3 - ribosomal 60s subunit protein l3, RPS6A - ribosomal 40s subunit protein s6a, RRP7 - rrp7p, NOG1 - nog1p, NSA1 - nsa1p, NFS1 - …
GO:0007020	microtubule nucleation	6.3e-11	2.56e-08	12.09	4095	17	239	12	[NUF2 - nuf2p, SPC42 - spc42p, SPC25 - spc25p, STU1 - stu1p, SPC24 - spc24p, SPC97 - spc97p, SPC98 - spc98p, SPC105 - spc105p, SPC29 - spc29p, STU2 - stu2p, BIM1 - bim1p, TID3 - tid3p]
GO:0007049	cell cycle	7.62e-11	2.86e-08	4.14	4095	297	100	30	[MCM2 - mcm2p, IQG1 - iqg1p, SMC2 - condensin subunit smc2, SAP185 - sap185p, SPC97 - spc97p, MTW1 - mtw1p, CDC12 - septin cdc12, CDC15 - cdc15p, SAP155 - sap155p, TID3 - tid3p, CDC45 - cdc45p, NUF2 - nuf2p, SPC24 - spc24p, OKP1 - okp1p, SFI1 - sfi1p, KAR3 - kar3p, DSN1 - dsn1p, RAD53 - rad53p, SPC25 - spc25p, MCM21 - mcm21p, MET30 - met30p, SNF1 - snf1p, CDC34 - scf e2 ubiquitin-protein ligase c…
GO:0043170	macromolecule metabolic process	1.3e-10	4.53e-08	1.25	4095	1948	677	404	[ECM16 - ecm16p, TFA2 - tfa2p, LAS1 - las1p, MRP10 - mitochondrial 37s ribosomal protein yms-t, SNF6 - snf6p, MRC1 - mrc1p, RPS16A - ribosomal 40s subunit protein s16a, MRF1 - mrf1p, PBN1 - pbn1p, STO1 - sto1p, SUT1 - sut1p, MED2 - med2p, MLP1 - mlp1p, PGM2 - phosphoglucomutase pgm2, RRP7 - rrp7p, CDC20 - cdc20p, SNF4 - snf4p, TAF6 - taf6p, NSA1 - nsa1p, NFS1 - nfs1p, RPL4B - ribosomal 60s subuni…
GO:0007059	chromosome segregation	5.26e-10	1.71e-07	7.73	4095	100	90	17	[DSN1 - dsn1p, SLI15 - sli15p, SMC2 - condensin subunit smc2, SPC25 - spc25p, MCM21 - mcm21p, CBF2 - cbf2p, KIP3 - tubulin-dependent atpase kip3, MTW1 - mtw1p, DAD3 - dad3p, TID3 - tid3p, NUF2 - nuf2p, SPC24 - spc24p, SCM3 - scm3p, OKP1 - okp1p, GLC7 - glc7p, NSL1 - nsl1p, ESP1 - esp1p]
GO:0006352	DNA-templated transcription, initiation	8.62e-10	2.62e-07	5.71	4095	25	488	17	[SSL2 - ssl2p, TFA2 - tfa2p, RRN7 - rrn7p, TAF10 - taf10p, SRB4 - srb4p, TFA1 - tfa1p, TAF9 - taf9p, DST1 - dst1p, TAF14 - taf14p, SPT15 - spt15p, RPB4 - rpb4p, TFG1 - tfg1p, TAF6 - taf6p, RRN6 - rrn6p, RPC17 - rpc17p, TFC3 - tfc3p, TAF12 - taf12p]
GO:0098789	pre-mRNA cleavage required for polyadenylation	1.21e-09	3.45e-07	7.67	4095	11	534	11	[MPE1 - mpe1p, CFT2 - cft2p, YSH1 - ysh1p, HRP1 - hrp1p, RNA14 - rna14p, PTI1 - pti1p, PTA1 - pta1p, YTH1 - yth1p, PCF11 - pcf11p, CFT1 - cft1p, PFS2 - pfs2p]
GO:0098787	mRNA cleavage involved in mRNA processing	1.21e-09	3.26e-07	7.67	4095	11	534	11	[MPE1 - mpe1p, YSH1 - ysh1p, CFT2 - cft2p, RNA14 - rna14p, HRP1 - hrp1p, PTI1 - pti1p, PTA1 - pta1p, YTH1 - yth1p, PCF11 - pcf11p, CFT1 - cft1p, PFS2 - pfs2p]
GO:0006139	nucleobase-containing compound metabolic process	1.29e-09	3.3e-07	1.27	4095	1346	952	397	[ECM16 - ecm16p, TFA2 - tfa2p, LAS1 - las1p, SNF6 - snf6p, MRC1 - mrc1p, RPS16A - ribosomal 40s subunit protein s16a, KAR4 - kar4p, GPM2 - phosphoglycerate mutase family protein gpm2, STO1 - sto1p, SUT1 - sut1p, MED2 - med2p, MLP1 - mlp1p, PGM2 - phosphoglucomutase pgm2, RRP7 - rrp7p, SKI3 - ski3p, SNF4 - snf4p, TAF6 - taf6p, NSA1 - nsa1p, NFS1 - nfs1p, PRP4 - prp4p, DPB2 - dpb2p, UTP15 - utp15p,…
GO:0009059	macromolecule biosynthetic process	1.31e-09	3.18e-07	1.38	4095	872	899	264	[TFA2 - tfa2p, MRP10 - mitochondrial 37s ribosomal protein yms-t, SNF6 - snf6p, HAP5 - hap5p, MRC1 - mrc1p, RPL23B - ribosomal 60s subunit protein l23b, MRF1 - mrf1p, RPS16A - ribosomal 40s subunit protein s16a, UTP10 - utp10p, RPA43 - rpa43p, SUT1 - sut1p, MED2 - med2p, RPL27B - ribosomal 60s subunit protein l27b, PGM2 - phosphoglucomutase pgm2, SNF4 - snf4p, SPT15 - spt15p, RPB4 - rpb4p, TAF6 -…
GO:0071840	cellular component organization or biogenesis	2.13e-09	4.94e-07	1.29	4095	1557	682	335	[YLR194C - hypothetical protein, ECM16 - ecm16p, NSA2 - nsa2p, LAS1 - las1p, YMR134W - hypothetical protein, SNF6 - snf6p, GIN4 - gin4p, MRC1 - mrc1p, MRF1 - mrf1p, NOP56 - nop56p, UTP10 - utp10p, GLE2 - gle2p, RPA43 - rpa43p, SPC24 - spc24p, LSM4 - lsm4p, RSA3 - rsa3p, ARP2 - actin-related protein 2, ALB1 - alb1p, GRH1 - grh1p, MED2 - med2p, SDC1 - sdc1p, LST8 - lst8p, MLP1 - mlp1p, BIK1 - bik1p…
GO:0000226	microtubule cytoskeleton organization	3.55e-09	7.86e-07	5.07	4095	66	257	21	[NUP2 - nup2p, SPC25 - spc25p, SPC97 - spc97p, KIP3 - tubulin-dependent atpase kip3, SPC98 - spc98p, CDC15 - cdc15p, MYO2 - myosin 2, SPC29 - spc29p, STU2 - stu2p, IPL1 - ipl1p, TID3 - tid3p, NUF2 - nuf2p, YRB2 - yrb2p, SPC42 - spc42p, SPC24 - spc24p, STU1 - stu1p, SFI1 - sfi1p, SPC105 - spc105p, KAR3 - kar3p, CDC14 - cdc14p, BIM1 - bim1p]
GO:0007017	microtubule-based process	4.91e-09	1.04e-06	11.36	4095	94	46	12	[NUF2 - nuf2p, SPC25 - spc25p, KIP3 - tubulin-dependent atpase kip3, CBF2 - cbf2p, SPC24 - spc24p, SPC97 - spc97p, CDC15 - cdc15p, SPC105 - spc105p, KAR3 - kar3p, SPC29 - spc29p, TID3 - tid3p, BBP1 - bbp1p]
GO:0032774	RNA biosynthetic process	8.9e-09	1.81e-06	1.52	4095	470	909	159	[TFA2 - tfa2p, SNF6 - snf6p, PCF11 - pcf11p, HAP5 - hap5p, RSC8 - rsc8p, HIR2 - hir2p, ETT1 - ett1p, UTP10 - utp10p, RPA43 - rpa43p, CYC8 - cyc8p, STB5 - stb5p, SUT1 - sut1p, MED2 - med2p, SIR3 - sir3p, SKN7 - skn7p, MET30 - met30p, SNF4 - snf4p, SPT15 - spt15p, RPB4 - rpb4p, TAF6 - taf6p, CST6 - cst6p, PTI1 - pti1p, RPA34 - rpa34p, UTP15 - utp15p, GLC7 - glc7p, SNT2 - snt2p, RPB3 - rpb3p, MOT1 -…
GO:0034645	cellular macromolecule biosynthetic process	1.39e-08	2.7e-06	1.36	4095	853	899	255	[TFA2 - tfa2p, MRP10 - mitochondrial 37s ribosomal protein yms-t, SNF6 - snf6p, HAP5 - hap5p, MRC1 - mrc1p, RPL23B - ribosomal 60s subunit protein l23b, RPS16A - ribosomal 40s subunit protein s16a, MRF1 - mrf1p, UTP10 - utp10p, RPA43 - rpa43p, SUT1 - sut1p, MED2 - med2p, RPL27B - ribosomal 60s subunit protein l27b, PGM2 - phosphoglucomutase pgm2, SNF4 - snf4p, SPT15 - spt15p, RPB4 - rpb4p, TAF6 -…
GO:0044085	cellular component biogenesis	1.43e-08	2.68e-06	1.97	4095	231	658	73	[RPS0B - ribosomal 40s subunit protein s0b, ECM16 - ecm16p, NSA2 - nsa2p, DBP8 - atp-dependent rna helicase dbp8, FAF1 - faf1p, FCF2 - fcf2p, RRP8 - rrp8p, NOP16 - nop16p, NOP56 - nop56p, UTP10 - utp10p, REI1 - rei1p, UTP14 - utp14p, NUG1 - nug1p, RPA43 - rpa43p, SSF1 - ssf1p, RIA1 - ria1p, BRX1 - brx1p, RSA3 - rsa3p, MRPL11 - mitochondrial 54s ribosomal protein yml11, NOP10 - nop10p, RPS19B - ri…
GO:0006379	mRNA cleavage	2.03e-08	3.66e-06	5.58	4095	15	636	13	[MPE1 - mpe1p, CFT2 - cft2p, HRP1 - hrp1p, RNA14 - rna14p, POP8 - pop8p, PCF11 - pcf11p, CFT1 - cft1p, PFS2 - pfs2p, YSH1 - ysh1p, PTI1 - pti1p, PTA1 - pta1p, YTH1 - yth1p, RPA12 - rpa12p]
GO:0051301	cell division	3.51e-08	6.1e-06	5.53	4095	180	74	18	[DSN1 - dsn1p, IQG1 - iqg1p, SMC2 - condensin subunit smc2, SPC25 - spc25p, MCM21 - mcm21p, MTW1 - mtw1p, CDC12 - septin cdc12, CDC15 - cdc15p, CDC34 - scf e2 ubiquitin-protein ligase catalytic subunit cdc34, DAD3 - dad3p, TID3 - tid3p, NUF2 - nuf2p, DOC1 - anaphase promoting complex subunit doc1, SPC24 - spc24p, OKP1 - okp1p, GLC7 - glc7p, NSL1 - nsl1p, KAR3 - kar3p]
GO:0006725	cellular aromatic compound metabolic process	4.93e-08	8.29e-06	1.24	4095	1410	952	405	[ECM16 - ecm16p, TFA2 - tfa2p, LAS1 - las1p, SNF6 - snf6p, MRC1 - mrc1p, RPS16A - ribosomal 40s subunit protein s16a, KAR4 - kar4p, FOL3 - dihydrofolate synthase, GPM2 - phosphoglycerate mutase family protein gpm2, STO1 - sto1p, SUT1 - sut1p, MED2 - med2p, MLP1 - mlp1p, PGM2 - phosphoglucomutase pgm2, RRP7 - rrp7p, SKI3 - ski3p, SNF4 - snf4p, TAF6 - taf6p, NSA1 - nsa1p, NFS1 - nfs1p, PRP4 - prp4p…
GO:0006378	mRNA polyadenylation	6.21e-08	1.01e-05	6.13	4095	15	534	12	[MPE1 - mpe1p, YSH1 - ysh1p, CFT2 - cft2p, RNA14 - rna14p, HRP1 - hrp1p, PTI1 - pti1p, PTA1 - pta1p, YTH1 - yth1p, PAP1 - pap1p, PCF11 - pcf11p, CFT1 - cft1p, PFS2 - pfs2p]
GO:0070897	DNA-templated transcriptional preinitiation complex assembly	8.46e-08	1.33e-05	4.06	4095	40	504	20	[MED2 - med2p, RRN7 - rrn7p, TAF10 - taf10p, SRB4 - srb4p, PGD1 - pgd1p, TAF9 - taf9p, ROX3 - rox3p, SUA7 - sua7p, DST1 - dst1p, TAF14 - taf14p, TFG1 - tfg1p, SPT15 - spt15p, TAF6 - taf6p, MED6 - med6p, SRB2 - srb2p, CSE2 - cse2p, GAL11 - gal11p, SIN4 - sin4p, SUB1 - sub1p, TAF12 - taf12p]
GO:0006351	transcription, DNA-templated	1.18e-07	1.79e-05	1.5	4095	448	909	149	[TFA2 - tfa2p, SNF6 - snf6p, PCF11 - pcf11p, HAP5 - hap5p, RSC8 - rsc8p, HIR2 - hir2p, ETT1 - ett1p, UTP10 - utp10p, RPA43 - rpa43p, CYC8 - cyc8p, STB5 - stb5p, SUT1 - sut1p, MED2 - med2p, SIR3 - sir3p, SKN7 - skn7p, MET30 - met30p, SNF4 - snf4p, SPT15 - spt15p, RPB4 - rpb4p, TAF6 - taf6p, CST6 - cst6p, RPA34 - rpa34p, UTP15 - utp15p, SNT2 - snt2p, RPB3 - rpb3p, MOT1 - mot1p, NUT2 - nut2p, SOH1 -…
GO:0097659	nucleic acid-templated transcription	1.18e-07	1.74e-05	1.5	4095	448	909	149	[TFA2 - tfa2p, SNF6 - snf6p, PCF11 - pcf11p, HAP5 - hap5p, RSC8 - rsc8p, HIR2 - hir2p, ETT1 - ett1p, UTP10 - utp10p, RPA43 - rpa43p, CYC8 - cyc8p, STB5 - stb5p, SUT1 - sut1p, MED2 - med2p, SIR3 - sir3p, SKN7 - skn7p, MET30 - met30p, SNF4 - snf4p, SPT15 - spt15p, RPB4 - rpb4p, TAF6 - taf6p, CST6 - cst6p, RPA34 - rpa34p, UTP15 - utp15p, SNT2 - snt2p, RPB3 - rpb3p, MOT1 - mot1p, NUT2 - nut2p, SOH1 -…
GO:0034641	cellular nitrogen compound metabolic process	1.52e-07	2.18e-05	1.21	4095	1636	919	443	[ECM16 - ecm16p, TFA2 - tfa2p, LAS1 - las1p, MRP10 - mitochondrial 37s ribosomal protein yms-t, SNF6 - snf6p, MRC1 - mrc1p, RPS16A - ribosomal 40s subunit protein s16a, MRF1 - mrf1p, KAR4 - kar4p, FOL3 - dihydrofolate synthase, GPM2 - phosphoglycerate mutase family protein gpm2, STO1 - sto1p, SUT1 - sut1p, MED2 - med2p, MLP1 - mlp1p, PGM2 - phosphoglucomutase pgm2, RRP7 - rrp7p, SKI3 - ski3p, SNF…
GO:0042790	nucleolar large rRNA transcription by RNA polymerase I	2.17e-07	3.03e-05	4.17	4095	16	860	14	[RRN7 - rrn7p, RRN9 - rrn9p, RPA135 - rpa135p, RRN5 - rrn5p, SPT15 - spt15p, RPA49 - rpa49p, RRN6 - rrn6p, RPA14 - rpa14p, RPA43 - rpa43p, RPA34 - rpa34p, RRN11 - rrn11p, MOT1 - mot1p, RPA12 - rpa12p, RRN10 - rrn10p]
GO:0046483	heterocycle metabolic process	2.29e-07	3.1e-05	1.22	4095	1416	952	403	[ECM16 - ecm16p, TFA2 - tfa2p, LAS1 - las1p, SNF6 - snf6p, MRC1 - mrc1p, RPS16A - ribosomal 40s subunit protein s16a, KAR4 - kar4p, FOL3 - dihydrofolate synthase, GPM2 - phosphoglycerate mutase family protein gpm2, STO1 - sto1p, SUT1 - sut1p, MED2 - med2p, MLP1 - mlp1p, PGM2 - phosphoglucomutase pgm2, RRP7 - rrp7p, SKI3 - ski3p, SNF4 - snf4p, TAF6 - taf6p, NSA1 - nsa1p, NFS1 - nfs1p, PRP4 - prp4p…
GO:0090501	RNA phosphodiester bond hydrolysis	2.38e-07	3.13e-05	2.38	4095	110	658	42	[RPS27B - ribosomal 40s subunit protein s27b, RPL17A - ribosomal 60s subunit protein l17a, DBP8 - atp-dependent rna helicase dbp8, RPS0B - ribosomal 40s subunit protein s0b, LAS1 - las1p, MPE1 - mpe1p, CFT2 - cft2p, RRP42 - rrp42p, HRP1 - hrp1p, RNA14 - rna14p, POP8 - pop8p, FCF2 - fcf2p, DBP3 - rna-dependent atpase dbp3, PCF11 - pcf11p, CFT1 - cft1p, MTR3 - mtr3p, PFS2 - pfs2p, UTP14 - utp14p, U…
GO:0051123	RNA polymerase II transcriptional preinitiation complex assembly	2.58e-07	3.3e-05	4.18	4095	35	504	18	[MED2 - med2p, TAF10 - taf10p, SRB4 - srb4p, PGD1 - pgd1p, TAF9 - taf9p, ROX3 - rox3p, SUA7 - sua7p, DST1 - dst1p, TAF14 - taf14p, TFG1 - tfg1p, SPT15 - spt15p, TAF6 - taf6p, MED6 - med6p, SRB2 - srb2p, CSE2 - cse2p, GAL11 - gal11p, SIN4 - sin4p, TAF12 - taf12p]
GO:0071459	protein localization to chromosome, centromeric region	3.27e-07	4.08e-05	7.8	4095	15	350	10	[MCM21 - mcm21p, CRM1 - crm1p, SCM3 - scm3p, MTW1 - mtw1p, GLC7 - glc7p, AME1 - ame1p, SPC105 - spc105p, CTF19 - ctf19p, BUB1 - bub1p, TID3 - tid3p]
GO:0051726	regulation of cell cycle	4.34e-07	5.28e-05	5.38	4095	243	47	15	[RAD53 - rad53p, SMC2 - condensin subunit smc2, KIP3 - tubulin-dependent atpase kip3, PSY4 - psy4p, CDC15 - cdc15p, CEP3 - cep3p, CDC45 - cdc45p, SCC2 - scc2p, KIN4 - kin4p, TPD3 - tpd3p, GLC7 - glc7p, ESP1 - esp1p, SPC105 - spc105p, PSY2 - psy2p, KAR3 - kar3p]
GO:0007010	cytoskeleton organization	5.4e-07	6.42e-05	6.82	4095	150	52	13	[SPC25 - spc25p, SPC97 - spc97p, CBF2 - cbf2p, KIP3 - tubulin-dependent atpase kip3, CDC12 - septin cdc12, CDC15 - cdc15p, SPC29 - spc29p, CEP3 - cep3p, TID3 - tid3p, NUF2 - nuf2p, SPC24 - spc24p, SPC105 - spc105p, KAR3 - kar3p]
GO:1901360	organic cyclic compound metabolic process	9.33e-07	0.000108	1.21	4095	1471	952	413	[ECM16 - ecm16p, TFA2 - tfa2p, LAS1 - las1p, YMR134W - hypothetical protein, SNF6 - snf6p, MRC1 - mrc1p, RPS16A - ribosomal 40s subunit protein s16a, KAR4 - kar4p, FOL3 - dihydrofolate synthase, GPM2 - phosphoglycerate mutase family protein gpm2, STO1 - sto1p, SUT1 - sut1p, MED2 - med2p, MLP1 - mlp1p, PGM2 - phosphoglucomutase pgm2, RRP7 - rrp7p, SKI3 - ski3p, SNF4 - snf4p, TAF6 - taf6p, NSA1 - n…
GO:0031124	mRNA 3'-end processing	9.38e-07	0.000106	4.23	4095	29	534	16	[MPE1 - mpe1p, CFT2 - cft2p, RNA14 - rna14p, HRP1 - hrp1p, PAP1 - pap1p, PCF11 - pcf11p, SAC3 - sac3p, CFT1 - cft1p, NRD1 - nrd1p, PFS2 - pfs2p, THP1 - thp1p, YSH1 - ysh1p, PTI1 - pti1p, PTA1 - pta1p, YTH1 - yth1p, THO2 - tho2p]
GO:0043933	macromolecular complex subunit organization	1.3e-06	0.000143	1.46	4095	509	809	147	[PRP42 - prp42p, SEC65 - sec65p, MTW1 - mtw1p, GIN4 - gin4p, RSC8 - rsc8p, HIR2 - hir2p, MRF1 - mrf1p, ETT1 - ett1p, ADD66 - add66p, CYC8 - cyc8p, LSM4 - lsm4p, RSA3 - rsa3p, RPS19B - ribosomal 40s subunit protein s19b, NOB1 - nob1p, MED2 - med2p, RPN10 - proteasome regulatory particle base subunit rpn10, SQT1 - sqt1p, RPL3 - ribosomal 60s subunit protein l3, CBF2 - cbf2p, RRP7 - rrp7p, PKP1 - pk…
GO:0033047	regulation of mitotic sister chromatid segregation	1.72e-06	0.000186	12.91	4095	54	47	8	[SCC2 - scc2p, KIN4 - kin4p, KIP3 - tubulin-dependent atpase kip3, TPD3 - tpd3p, GLC7 - glc7p, ESP1 - esp1p, SPC105 - spc105p, CEP3 - cep3p]
GO:0008608	attachment of spindle microtubules to kinetochore	1.76e-06	0.000187	4.88	4095	30	392	14	[DSN1 - dsn1p, MIF2 - mif2p, CTF19 - ctf19p, DAD3 - dad3p, IPL1 - ipl1p, TID3 - tid3p, BUB1 - bub1p, NUF2 - nuf2p, OKP1 - okp1p, AME1 - ame1p, SPC105 - spc105p, DUO1 - duo1p, ASK1 - ask1p, DAD2 - dad2p]
GO:0065004	protein-DNA complex assembly	1.94e-06	0.000201	2.77	4095	85	504	29	[MCM2 - mcm2p, TAF10 - taf10p, RAD55 - rad55p, PGD1 - pgd1p, ROX3 - rox3p, SUA7 - sua7p, TAF14 - taf14p, CDC45 - cdc45p, CSE2 - cse2p, SIN4 - sin4p, TAF12 - taf12p, MED2 - med2p, RRN7 - rrn7p, SRB4 - srb4p, MCM21 - mcm21p, TAF9 - taf9p, FPR3 - peptidylprolyl isomerase fpr3, DST1 - dst1p, TFG1 - tfg1p, SPT15 - spt15p, FPR4 - peptidylprolyl isomerase fpr4, TAF6 - taf6p, BUB1 - bub1p, MED6 - med6p, …
GO:0033045	regulation of sister chromatid segregation	1.98e-06	0.000201	12.67	4095	55	47	8	[SCC2 - scc2p, KIN4 - kin4p, KIP3 - tubulin-dependent atpase kip3, TPD3 - tpd3p, GLC7 - glc7p, ESP1 - esp1p, SPC105 - spc105p, CEP3 - cep3p]
GO:0043631	RNA polyadenylation	2.13e-06	0.000212	4.75	4095	21	534	13	[MPE1 - mpe1p, CFT2 - cft2p, HRP1 - hrp1p, RNA14 - rna14p, PAP1 - pap1p, PCF11 - pcf11p, CFT1 - cft1p, PFS2 - pfs2p, SPT2 - spt2p, YSH1 - ysh1p, PTI1 - pti1p, PTA1 - pta1p, YTH1 - yth1p]
GO:0007051	spindle organization	2.6e-06	0.000253	5.98	4095	32	257	12	[NUF2 - nuf2p, NUP2 - nup2p, YRB2 - yrb2p, KIP3 - tubulin-dependent atpase kip3, SPC97 - spc97p, SPC98 - spc98p, SFI1 - sfi1p, CDC15 - cdc15p, KAR3 - kar3p, STU2 - stu2p, CDC14 - cdc14p, IPL1 - ipl1p]
GO:0010564	regulation of cell cycle process	2.95e-06	0.000282	2.42	4095	170	379	38	[BMH1 - bmh1p, NUP2 - nup2p, SMC2 - condensin subunit smc2, KIP3 - tubulin-dependent atpase kip3, CDC15 - cdc15p, MRC1 - mrc1p, SLT2 - slt2p, MLP2 - mlp2p, IPL1 - ipl1p, CDC45 - cdc45p, YCS4 - ycs4p, YRB2 - yrb2p, SPC105 - spc105p, KAR3 - kar3p, DMA1 - ubiquitin-conjugating protein dma1, CDC14 - cdc14p, BIM1 - bim1p, BUD2 - bud2p, SLI15 - sli15p, MCM21 - mcm21p, NET1 - net1p, NUR1 - nur1p, MOB1 -…
GO:0034622	cellular macromolecular complex assembly	3.6e-06	0.000337	1.51	4095	403	809	120	[PRP42 - prp42p, SEC65 - sec65p, GIN4 - gin4p, MTW1 - mtw1p, HIR2 - hir2p, ADD66 - add66p, LSM4 - lsm4p, RSA3 - rsa3p, RPS19B - ribosomal 40s subunit protein s19b, NOB1 - nob1p, MED2 - med2p, SQT1 - sqt1p, RPN10 - proteasome regulatory particle base subunit rpn10, RPL3 - ribosomal 60s subunit protein l3, CBF2 - cbf2p, RRP7 - rrp7p, NOG1 - nog1p, PKP1 - pkp1p, RPB4 - rpb4p, SPT15 - spt15p, FPR4 - …
GO:0065003	macromolecular complex assembly	3.99e-06	0.000366	1.5	4095	416	809	123	[PRP42 - prp42p, SEC65 - sec65p, GIN4 - gin4p, MTW1 - mtw1p, HIR2 - hir2p, ADD66 - add66p, LSM4 - lsm4p, RSA3 - rsa3p, RPS19B - ribosomal 40s subunit protein s19b, NOB1 - nob1p, MED2 - med2p, RPN10 - proteasome regulatory particle base subunit rpn10, SQT1 - sqt1p, RPL3 - ribosomal 60s subunit protein l3, CBF2 - cbf2p, RRP7 - rrp7p, PKP1 - pkp1p, NOG1 - nog1p, FPR4 - peptidylprolyl isomerase fpr4,…
GO:0051276	chromosome organization	4.48e-06	0.000404	2.13	4095	205	423	45	[SSL2 - ssl2p, NUP2 - nup2p, SMC2 - condensin subunit smc2, KIP3 - tubulin-dependent atpase kip3, MTW1 - mtw1p, RFC4 - replication factor c subunit 4, TBF1 - tbf1p, MRC1 - mrc1p, MLP2 - mlp2p, RFA2 - rfa2p, IPL1 - ipl1p, CDC45 - cdc45p, NUF2 - nuf2p, YCS4 - ycs4p, THP1 - thp1p, SCM3 - scm3p, RIF1 - rif1p, ABF2 - abf2p, PUT3 - put3p, NOP10 - nop10p, KAR3 - kar3p, BIM1 - bim1p, YTM1 - ytm1p, SWD1 -…
GO:0007088	regulation of mitotic nuclear division	4.73e-06	0.000419	9.45	4095	83	47	9	[SCC2 - scc2p, KIN4 - kin4p, KIP3 - tubulin-dependent atpase kip3, TPD3 - tpd3p, GLC7 - glc7p, CDC15 - cdc15p, ESP1 - esp1p, SPC105 - spc105p, CEP3 - cep3p]
GO:0022607	cellular component assembly	5.07e-06	0.000441	1.4	4095	568	839	163	[PRP42 - prp42p, SMC2 - condensin subunit smc2, SPC97 - spc97p, SEC65 - sec65p, MTW1 - mtw1p, GIN4 - gin4p, HIR2 - hir2p, ADD66 - add66p, UTH1 - uth1p, CYC8 - cyc8p, ATG18 - atg18p, LSM4 - lsm4p, RSA3 - rsa3p, ARP2 - actin-related protein 2, RPS19B - ribosomal 40s subunit protein s19b, CDC14 - cdc14p, NOB1 - nob1p, MED2 - med2p, RPN10 - proteasome regulatory particle base subunit rpn10, SQT1 - sq…
GO:0051783	regulation of nuclear division	5.54e-06	0.000474	7.92	4095	110	47	10	[SCC2 - scc2p, KIN4 - kin4p, SMC2 - condensin subunit smc2, KIP3 - tubulin-dependent atpase kip3, TPD3 - tpd3p, GLC7 - glc7p, CDC15 - cdc15p, ESP1 - esp1p, SPC105 - spc105p, CEP3 - cep3p]
GO:0034502	protein localization to chromosome	7.39e-06	0.000621	5.2	4095	27	350	12	[SCC2 - scc2p, MCM21 - mcm21p, CRM1 - crm1p, SCM3 - scm3p, MTW1 - mtw1p, GLC7 - glc7p, AME1 - ame1p, SPC105 - spc105p, CTF19 - ctf19p, TFC3 - tfc3p, BUB1 - bub1p, TID3 - tid3p]
GO:0042273	ribosomal large subunit biogenesis	7.63e-06	0.00063	2.54	4095	43	936	25	[NSA2 - nsa2p, RPL14A - ribosomal 60s subunit protein l14a, NOP15 - nop15p, TIF4631 - tif4631p, RPL26B - ribosomal 60s subunit protein l26b, NIP7 - nip7p, RPL7A - ribosomal 60s subunit protein l7a, TIF6 - tif6p, RRP8 - rrp8p, NOP16 - nop16p, MAK11 - mak11p, REI1 - rei1p, ALB1 - alb1p, YTM1 - ytm1p, MRT4 - mrt4p, RIX7 - putative aaa family atpase rix7, SQT1 - sqt1p, RPL14B - ribosomal 60s subunit …
GO:0051983	regulation of chromosome segregation	7.67e-06	0.000623	10.72	4095	65	47	8	[SCC2 - scc2p, KIN4 - kin4p, KIP3 - tubulin-dependent atpase kip3, TPD3 - tpd3p, GLC7 - glc7p, ESP1 - esp1p, SPC105 - spc105p, CEP3 - cep3p]
GO:0098781	ncRNA transcription	8.25e-06	0.000659	3.18	4095	45	573	20	[RRN7 - rrn7p, BDF1 - bdf1p, RPC37 - rpc37p, RRN9 - rrn9p, DST1 - dst1p, TBF1 - tbf1p, RRN5 - rrn5p, SPT15 - spt15p, RPA49 - rpa49p, RRN6 - rrn6p, TFC7 - tfc7p, RET1 - ret1p, RPA43 - rpa43p, RPC17 - rpc17p, RPC40 - rpc40p, MOT1 - mot1p, TFC3 - tfc3p, RPA12 - rpa12p, RPC53 - rpc53p, RRN10 - rrn10p]
GO:0007346	regulation of mitotic cell cycle	1.22e-05	0.00096	6.39	4095	150	47	11	[CDC45 - cdc45p, SCC2 - scc2p, KIN4 - kin4p, KIP3 - tubulin-dependent atpase kip3, TPD3 - tpd3p, GLC7 - glc7p, CDC15 - cdc15p, ESP1 - esp1p, SPC105 - spc105p, KAR3 - kar3p, CEP3 - cep3p]
GO:0006357	regulation of transcription by RNA polymerase II	1.49e-05	0.00115	1.46	4095	377	909	122	[SNF6 - snf6p, HAP5 - hap5p, HIR2 - hir2p, KAR4 - kar4p, ETT1 - ett1p, CYC8 - cyc8p, CLA4 - cla4p, STB5 - stb5p, SUT1 - sut1p, DIG1 - dig1p, CAM1 - cam1p, MED2 - med2p, SPT10 - spt10p, MLP1 - mlp1p, SKN7 - skn7p, SNF4 - snf4p, RFX1 - rfx1p, CST6 - cst6p, GLC7 - glc7p, CEG1 - ceg1p, SNT2 - snt2p, DIG2 - dig2p, NUT2 - nut2p, MOT1 - mot1p, SOH1 - soh1p, SWI6 - swi6p, SEN1 - putative dna/rna helicase…
GO:0000070	mitotic sister chromatid segregation	1.8e-05	0.00137	15.39	4095	28	57	6	[DSN1 - dsn1p, SMC2 - condensin subunit smc2, KIP3 - tubulin-dependent atpase kip3, MTW1 - mtw1p, NSL1 - nsl1p, ESP1 - esp1p]
GO:0034501	protein localization to kinetochore	1.86e-05	0.00139	8.19	4095	10	350	7	[CRM1 - crm1p, MTW1 - mtw1p, GLC7 - glc7p, AME1 - ame1p, SPC105 - spc105p, BUB1 - bub1p, TID3 - tid3p]
GO:0098813	nuclear chromosome segregation	2.03e-05	0.0015	11.7	4095	43	57	7	[DSN1 - dsn1p, NUF2 - nuf2p, SMC2 - condensin subunit smc2, KIP3 - tubulin-dependent atpase kip3, MTW1 - mtw1p, NSL1 - nsl1p, ESP1 - esp1p]
GO:0048518	positive regulation of biological process	2.12e-05	0.00154	1.33	4095	572	999	186	[SNF6 - snf6p, HAP5 - hap5p, IML1 - iml1p, SAW1 - saw1p, KAR4 - kar4p, UTP10 - utp10p, ETT1 - ett1p, KOG1 - kog1p, UTH1 - uth1p, CYC8 - cyc8p, CLA4 - cla4p, ARP2 - actin-related protein 2, SIF2 - sif2p, SUT1 - sut1p, CDC14 - cdc14p, CAM1 - cam1p, MED2 - med2p, LST8 - lst8p, POL30 - pol30p, SIR3 - sir3p, MLP1 - mlp1p, SKN7 - skn7p, SNF1 - snf1p, CDC20 - cdc20p, SNF4 - snf4p, RPB4 - rpb4p, PEA2 - p…
GO:0048522	positive regulation of cellular process	2.14e-05	0.00153	1.34	4095	554	999	181	[SNF6 - snf6p, HAP5 - hap5p, IML1 - iml1p, SAW1 - saw1p, KAR4 - kar4p, UTP10 - utp10p, ETT1 - ett1p, KOG1 - kog1p, UTH1 - uth1p, CYC8 - cyc8p, CLA4 - cla4p, ARP2 - actin-related protein 2, SIF2 - sif2p, SUT1 - sut1p, CDC14 - cdc14p, CAM1 - cam1p, MED2 - med2p, LST8 - lst8p, SIR3 - sir3p, POL30 - pol30p, MLP1 - mlp1p, SKN7 - skn7p, SNF1 - snf1p, CDC20 - cdc20p, SNF4 - snf4p, RPB4 - rpb4p, PEA2 - p…
GO:0016043	cellular component organization	2.34e-05	0.00165	1.31	4095	1409	416	188	[YLR194C - hypothetical protein, LAS1 - las1p, SMC2 - condensin subunit smc2, SHE3 - she3p, SPC97 - spc97p, SEC65 - sec65p, MTW1 - mtw1p, MRC1 - mrc1p, RFA2 - rfa2p, MYO4 - myosin 4, MRF1 - mrf1p, KOG1 - kog1p, CMD1 - cmd1p, SPC24 - spc24p, ARP2 - actin-related protein 2, RPS19B - ribosomal 40s subunit protein s19b, GRH1 - grh1p, CDC14 - cdc14p, NOB1 - nob1p, DSN1 - dsn1p, MED2 - med2p, POL30 - p…
GO:0006355	regulation of transcription, DNA-templated	2.65e-05	0.00184	1.35	4095	589	909	176	[TFA2 - tfa2p, SNF6 - snf6p, PCF11 - pcf11p, MRC1 - mrc1p, HAP5 - hap5p, RSC8 - rsc8p, HIR2 - hir2p, KAR4 - kar4p, UTP10 - utp10p, ETT1 - ett1p, UTH1 - uth1p, CYC8 - cyc8p, CLA4 - cla4p, STB5 - stb5p, SUT1 - sut1p, DIG1 - dig1p, CAM1 - cam1p, SDC1 - sdc1p, MED2 - med2p, SPT10 - spt10p, POL30 - pol30p, SIR3 - sir3p, MLP1 - mlp1p, MET30 - met30p, SKN7 - skn7p, SNF4 - snf4p, SPT15 - spt15p, TAF6 - t…
GO:0044260	cellular macromolecule metabolic process	2.68e-05	0.00184	1.21	4095	1613	697	331	[TFA2 - tfa2p, MRP10 - mitochondrial 37s ribosomal protein yms-t, SNF6 - snf6p, GIN4 - gin4p, HAP5 - hap5p, MRC1 - mrc1p, RPL23B - ribosomal 60s subunit protein l23b, PRE10 - proteasome core particle subunit alpha 7, MRF1 - mrf1p, RPS16A - ribosomal 40s subunit protein s16a, UTP10 - utp10p, PBN1 - pbn1p, RPA43 - rpa43p, LSM4 - lsm4p, STO1 - sto1p, SUT1 - sut1p, CPR6 - peptidylprolyl isomerase cpr…
GO:0051128	regulation of cellular component organization	2.82e-05	0.00191	1.53	4095	368	713	98	[SMC2 - condensin subunit smc2, CDC23 - anaphase promoting complex subunit cdc23, KOG1 - kog1p, CMD1 - cmd1p, UTH1 - uth1p, CLA4 - cla4p, ARP2 - actin-related protein 2, DIG1 - dig1p, CDC14 - cdc14p, CAM1 - cam1p, LST8 - lst8p, MLP1 - mlp1p, SIR3 - sir3p, BIK1 - bik1p, CDC20 - cdc20p, FPR4 - peptidylprolyl isomerase fpr4, GLC7 - glc7p, DIG2 - dig2p, MOT1 - mot1p, DAD2 - dad2p, ORC5 - origin recog…
GO:0044271	cellular nitrogen compound biosynthetic process	2.97e-05	0.00198	1.26	4095	949	899	262	[TFA2 - tfa2p, MRP10 - mitochondrial 37s ribosomal protein yms-t, SNF6 - snf6p, HAP5 - hap5p, RPL23B - ribosomal 60s subunit protein l23b, MRF1 - mrf1p, RPS16A - ribosomal 40s subunit protein s16a, UTP10 - utp10p, FOL3 - dihydrofolate synthase, RPA43 - rpa43p, SUT1 - sut1p, MED2 - med2p, RPL27B - ribosomal 60s subunit protein l27b, URA2 - ura2p, SNF4 - snf4p, SPT15 - spt15p, RPB4 - rpb4p, TAF6 - …
GO:0070507	regulation of microtubule cytoskeleton organization	3.06e-05	0.00201	5.05	4095	26	343	11	[NUP2 - nup2p, YRB2 - yrb2p, KIP3 - tubulin-dependent atpase kip3, ESP1 - esp1p, DUO1 - duo1p, DAD3 - dad3p, ASK1 - ask1p, KAR3 - kar3p, DAD2 - dad2p, BIM1 - bim1p, IPL1 - ipl1p]
GO:0006397	mRNA processing	3.11e-05	0.00202	1.66	4095	171	996	69	[MPE1 - mpe1p, PRP42 - prp42p, PRP24 - prp24p, SLU7 - slu7p, PCF11 - pcf11p, PFS2 - pfs2p, CWC22 - cwc22p, THP1 - thp1p, LSM4 - lsm4p, MUD2 - mud2p, LSM8 - lsm8p, YTH1 - yth1p, STO1 - sto1p, LSM1 - lsm1p, GLE1 - gle1p, PRP3 - prp3p, CWC2 - cwc2p, HSH49 - hsh49p, RPB4 - rpb4p, MRS1 - mrs1p, SMX3 - smx3p, BRR1 - brr1p, PRP4 - prp4p, SPT5 - spt5p, CDC40 - cdc40p, PTI1 - pti1p, GLC7 - glc7p, CEG1 - c…
GO:0071824	protein-DNA complex subunit organization	3.35e-05	0.00215	2.22	4095	132	504	36	[SSL2 - ssl2p, MCM2 - mcm2p, TAF10 - taf10p, SNF5 - snf5p, PGD1 - pgd1p, RAD55 - rad55p, ROX3 - rox3p, SUA7 - sua7p, TAF14 - taf14p, CDC45 - cdc45p, STH1 - sth1p, CSE2 - cse2p, SIN4 - sin4p, TAF12 - taf12p, MED2 - med2p, RRN7 - rrn7p, MCM21 - mcm21p, SRB4 - srb4p, TFA1 - tfa1p, FPR3 - peptidylprolyl isomerase fpr3, TAF9 - taf9p, RVB1 - ruvb family atp-dependent dna helicase pontin, DST1 - dst1p, …
GO:2001141	regulation of RNA biosynthetic process	3.95e-05	0.0025	1.34	4095	593	909	176	[TFA2 - tfa2p, SNF6 - snf6p, PCF11 - pcf11p, MRC1 - mrc1p, HAP5 - hap5p, RSC8 - rsc8p, HIR2 - hir2p, KAR4 - kar4p, UTP10 - utp10p, ETT1 - ett1p, UTH1 - uth1p, CYC8 - cyc8p, CLA4 - cla4p, STB5 - stb5p, SUT1 - sut1p, DIG1 - dig1p, CAM1 - cam1p, SDC1 - sdc1p, MED2 - med2p, SPT10 - spt10p, SIR3 - sir3p, POL30 - pol30p, MLP1 - mlp1p, SKN7 - skn7p, MET30 - met30p, SNF4 - snf4p, SPT15 - spt15p, TAF6 - t…
GO:1903506	regulation of nucleic acid-templated transcription	3.95e-05	0.00247	1.34	4095	593	909	176	[TFA2 - tfa2p, SNF6 - snf6p, PCF11 - pcf11p, MRC1 - mrc1p, HAP5 - hap5p, RSC8 - rsc8p, HIR2 - hir2p, KAR4 - kar4p, UTP10 - utp10p, ETT1 - ett1p, UTH1 - uth1p, CYC8 - cyc8p, CLA4 - cla4p, STB5 - stb5p, SUT1 - sut1p, DIG1 - dig1p, CAM1 - cam1p, SDC1 - sdc1p, MED2 - med2p, SPT10 - spt10p, SIR3 - sir3p, POL30 - pol30p, MLP1 - mlp1p, SKN7 - skn7p, MET30 - met30p, SNF4 - snf4p, SPT15 - spt15p, TAF6 - t…
GO:0006807	nitrogen compound metabolic process	4.16e-05	0.00257	1.14	4095	2297	752	479	[TFA2 - tfa2p, ECM16 - ecm16p, LAS1 - las1p, MRP10 - mitochondrial 37s ribosomal protein yms-t, SNF6 - snf6p, MRC1 - mrc1p, RPS16A - ribosomal 40s subunit protein s16a, MRF1 - mrf1p, PBN1 - pbn1p, FOL3 - dihydrofolate synthase, STO1 - sto1p, SUT1 - sut1p, MED2 - med2p, MLP1 - mlp1p, PGM2 - phosphoglucomutase pgm2, RRP7 - rrp7p, CDC20 - cdc20p, SNF4 - snf4p, TAF6 - taf6p, NSA1 - nsa1p, NFS1 - nfs1…
GO:0032886	regulation of microtubule-based process	4.64e-05	0.00283	4.86	4095	27	343	11	[NUP2 - nup2p, YRB2 - yrb2p, KIP3 - tubulin-dependent atpase kip3, ESP1 - esp1p, DUO1 - duo1p, DAD3 - dad3p, ASK1 - ask1p, KAR3 - kar3p, DAD2 - dad2p, BIM1 - bim1p, IPL1 - ipl1p]
GO:0006367	transcription initiation from RNA polymerase II promoter	6.04e-05	0.00363	6.06	4095	13	416	8	[SSL2 - ssl2p, TFA2 - tfa2p, SRB4 - srb4p, TFA1 - tfa1p, DST1 - dst1p, TAF14 - taf14p, RPB4 - rpb4p, TFG1 - tfg1p]
GO:0000469	cleavage involved in rRNA processing	6.27e-05	0.00373	2.53	4095	59	658	24	[RPS0B - ribosomal 40s subunit protein s0b, DBP8 - atp-dependent rna helicase dbp8, RPS27B - ribosomal 40s subunit protein s27b, RPL17A - ribosomal 60s subunit protein l17a, LAS1 - las1p, ESF2 - esf2p, RRP42 - rrp42p, LOC1 - loc1p, FCF2 - fcf2p, DBP3 - rna-dependent atpase dbp3, UTP18 - utp18p, MTR3 - mtr3p, UTP14 - utp14p, UTP10 - utp10p, RPS0A - ribosomal 40s subunit protein s0a, BUD21 - bud21p…
GO:0070925	organelle assembly	6.45e-05	0.00379	6.01	4095	74	92	10	[KIP3 - tubulin-dependent atpase kip3, CBF2 - cbf2p, SPC97 - spc97p, SCM3 - scm3p, CDC12 - septin cdc12, MTW1 - mtw1p, SFI1 - sfi1p, TIF6 - tif6p, KAR3 - kar3p, CEP3 - cep3p]
GO:0034625	fatty acid elongation, monounsaturated fatty acid	6.74e-05	0.00391	30.11	4095	3	136	3	[ELO1 - elo1p, FEN1 - fatty acid elongase fen1, SUR4 - fatty acid elongase sur4]
GO:0034626	fatty acid elongation, polyunsaturated fatty acid	6.74e-05	0.00386	30.11	4095	3	136	3	[ELO1 - elo1p, FEN1 - fatty acid elongase fen1, SUR4 - fatty acid elongase sur4]
GO:0019367	fatty acid elongation, saturated fatty acid	6.74e-05	0.00382	30.11	4095	3	136	3	[ELO1 - elo1p, FEN1 - fatty acid elongase fen1, SUR4 - fatty acid elongase sur4]
GO:0019368	fatty acid elongation, unsaturated fatty acid	6.74e-05	0.00377	30.11	4095	3	136	3	[ELO1 - elo1p, FEN1 - fatty acid elongase fen1, SUR4 - fatty acid elongase sur4]
GO:0031123	RNA 3'-end processing	7.21e-05	0.00399	2.68	4095	58	579	22	[RPS0B - ribosomal 40s subunit protein s0b, MPE1 - mpe1p, CFT2 - cft2p, RRP42 - rrp42p, RNA14 - rna14p, HRP1 - hrp1p, PAP1 - pap1p, PCF11 - pcf11p, SAC3 - sac3p, NRD1 - nrd1p, CFT1 - cft1p, MTR3 - mtr3p, PFS2 - pfs2p, RPS0A - ribosomal 40s subunit protein s0a, THP1 - thp1p, YSH1 - ysh1p, PTI1 - pti1p, PTA1 - pta1p, RRP45 - rrp45p, YTH1 - yth1p, REX2 - rex2p, THO2 - tho2p]
GO:0000819	sister chromatid segregation	7.45e-05	0.00408	12.32	4095	35	57	6	[DSN1 - dsn1p, SMC2 - condensin subunit smc2, KIP3 - tubulin-dependent atpase kip3, MTW1 - mtw1p, NSL1 - nsl1p, ESP1 - esp1p]
GO:0045944	positive regulation of transcription by RNA polymerase II	7.54e-05	0.00408	1.52	4095	258	909	87	[HAP3 - hap3p, SRB6 - srb6p, TAF1 - taf1p, NOT5 - ccr4-not core subunit not5, SNF5 - snf5p, PGD1 - pgd1p, SNF6 - snf6p, YAP1 - yap1p, HAP5 - hap5p, KAR4 - kar4p, ETT1 - ett1p, PDR1 - pdr1p, SOK2 - sok2p, MAC1 - mac1p, CYC8 - cyc8p, SUT1 - sut1p, CAM1 - cam1p, MED2 - med2p, MLP1 - mlp1p, SRB4 - srb4p, SKN7 - skn7p, ARP7 - arp7p, TAF9 - taf9p, RGR1 - rgr1p, RTG1 - rtg1p, MED6 - med6p, RFX1 - rfx1p,…
GO:0140029	exocytic process	7.57e-05	0.00405	3.6	4095	18	759	12	[PEP5 - pep5p, PEP3 - pep3p, SEC6 - sec6p, SEC8 - sec8p, VPS45 - vps45p, SLY1 - sly1p, SEC10 - sec10p, MYO2 - myosin 2, SEC5 - sec5p, VPS33 - vps33p, EXO70 - exo70p, SEC1 - sec1p]
GO:0034654	nucleobase-containing compound biosynthetic process	8.36e-05	0.00443	1.31	4095	614	935	184	[TFA2 - tfa2p, SNF6 - snf6p, HAP5 - hap5p, PCF11 - pcf11p, RFA2 - rfa2p, RSC8 - rsc8p, HIR2 - hir2p, UTP10 - utp10p, ETT1 - ett1p, RPA43 - rpa43p, CYC8 - cyc8p, ATP18 - atp18p, STB5 - stb5p, SUT1 - sut1p, MED2 - med2p, POL30 - pol30p, SIR3 - sir3p, MET30 - met30p, SKN7 - skn7p, URA2 - ura2p, SNF4 - snf4p, SPT15 - spt15p, RPB4 - rpb4p, TAF6 - taf6p, CST6 - cst6p, DPB2 - dpb2p, PTI1 - pti1p, RPA34 …
GO:0002181	cytoplasmic translation	8.68e-05	0.00455	1.93	4095	115	775	42	[RPS27B - ribosomal 40s subunit protein s27b, RPS0B - ribosomal 40s subunit protein s0b, RPL17A - ribosomal 60s subunit protein l17a, RPL29 - ribosomal 60s subunit protein l29, RPS1B - ribosomal 40s subunit protein s1b, RPL21A - ribosomal 60s subunit protein l21a, RPL14A - ribosomal 60s subunit protein l14a, RPL17B - rpl17bp, RPL26B - ribosomal 60s subunit protein l26b, RPL35B - ribosomal 60s sub…
GO:0090305	nucleic acid phosphodiester bond hydrolysis	0.000107	0.00555	1.86	4095	161	658	48	[RPS27B - ribosomal 40s subunit protein s27b, RPS0B - ribosomal 40s subunit protein s0b, RPL17A - ribosomal 60s subunit protein l17a, DBP8 - atp-dependent rna helicase dbp8, SSL2 - ssl2p, MPE1 - mpe1p, LAS1 - las1p, CFT2 - cft2p, RRP42 - rrp42p, RNA14 - rna14p, HRP1 - hrp1p, POP8 - pop8p, FCF2 - fcf2p, DBP3 - rna-dependent atpase dbp3, PCF11 - pcf11p, RAD50 - rad50p, CFT1 - cft1p, PFS2 - pfs2p, M…
GO:0033043	regulation of organelle organization	0.000122	0.00626	1.86	4095	271	381	47	[BMH1 - bmh1p, NUP2 - nup2p, MCM2 - mcm2p, SMC2 - condensin subunit smc2, KIP3 - tubulin-dependent atpase kip3, CDC15 - cdc15p, MLP2 - mlp2p, IPL1 - ipl1p, PHO23 - pho23p, CDC45 - cdc45p, YCS4 - ycs4p, YRB2 - yrb2p, MDM20 - mdm20p, SEC6 - sec6p, VPS45 - vps45p, SPC105 - spc105p, ADA2 - ada2p, ARP2 - actin-related protein 2, KAR3 - kar3p, PEF1 - pef1p, BIM1 - bim1p, DMA1 - ubiquitin-conjugating pr…
GO:0000470	maturation of LSU-rRNA	0.000123	0.00622	3.33	4095	37	499	15	[NSA2 - nsa2p, LAS1 - las1p, CIC1 - cic1p, SNF6 - snf6p, SPB4 - spb4p, RPL35B - ribosomal 60s subunit protein l35b, TIF6 - tif6p, MAK11 - mak11p, NUG1 - nug1p, SSF1 - ssf1p, URB1 - urb1p, NOP53 - nop53p, DBP7 - dbp7p, YTM1 - ytm1p, MAK5 - mak5p]
GO:1901990	regulation of mitotic cell cycle phase transition	0.000125	0.0063	7.42	4095	94	47	8	[CDC45 - cdc45p, KIN4 - kin4p, TPD3 - tpd3p, GLC7 - glc7p, CDC15 - cdc15p, ESP1 - esp1p, SPC105 - spc105p, CEP3 - cep3p]
GO:1902680	positive regulation of RNA biosynthetic process	0.000126	0.00625	1.44	4095	296	999	104	[SNF6 - snf6p, HAP5 - hap5p, KAR4 - kar4p, UTP10 - utp10p, ETT1 - ett1p, UTH1 - uth1p, CYC8 - cyc8p, SUT1 - sut1p, SIF2 - sif2p, CAM1 - cam1p, MED2 - med2p, MLP1 - mlp1p, SIR3 - sir3p, SKN7 - skn7p, RFX1 - rfx1p, CST6 - cst6p, UTP15 - utp15p, CEG1 - ceg1p, NUT2 - nut2p, SWI6 - swi6p, SNF12 - snf12p, HOS3 - hos3p, AFT1 - aft1p, SDS3 - sds3p, KIN28 - kin28p, SIP3 - sip3p, NPL3 - npl3p, TBF1 - tbf1p…
GO:0045893	positive regulation of transcription, DNA-templated	0.000126	0.00619	1.44	4095	296	999	104	[SNF6 - snf6p, HAP5 - hap5p, KAR4 - kar4p, UTP10 - utp10p, ETT1 - ett1p, UTH1 - uth1p, CYC8 - cyc8p, SUT1 - sut1p, SIF2 - sif2p, CAM1 - cam1p, MED2 - med2p, MLP1 - mlp1p, SIR3 - sir3p, SKN7 - skn7p, RFX1 - rfx1p, CST6 - cst6p, UTP15 - utp15p, CEG1 - ceg1p, NUT2 - nut2p, SWI6 - swi6p, SNF12 - snf12p, HOS3 - hos3p, AFT1 - aft1p, SDS3 - sds3p, KIN28 - kin28p, SIP3 - sip3p, NPL3 - npl3p, TBF1 - tbf1p…
GO:1903508	positive regulation of nucleic acid-templated transcription	0.000126	0.00613	1.44	4095	296	999	104	[SNF6 - snf6p, HAP5 - hap5p, KAR4 - kar4p, UTP10 - utp10p, ETT1 - ett1p, UTH1 - uth1p, CYC8 - cyc8p, SUT1 - sut1p, SIF2 - sif2p, CAM1 - cam1p, MED2 - med2p, MLP1 - mlp1p, SIR3 - sir3p, SKN7 - skn7p, RFX1 - rfx1p, CST6 - cst6p, UTP15 - utp15p, CEG1 - ceg1p, NUT2 - nut2p, SWI6 - swi6p, SNF12 - snf12p, HOS3 - hos3p, AFT1 - aft1p, SDS3 - sds3p, KIN28 - kin28p, SIP3 - sip3p, NPL3 - npl3p, TBF1 - tbf1p…
GO:0001113	transcriptional open complex formation at RNA polymerase II promoter	0.000127	0.00615	15.38	4095	5	213	4	[SSL2 - ssl2p, TFA1 - tfa1p, ROX3 - rox3p, SUA7 - sua7p]
GO:1901987	regulation of cell cycle phase transition	0.00014	0.00668	7.34	4095	95	47	8	[CDC45 - cdc45p, KIN4 - kin4p, TPD3 - tpd3p, GLC7 - glc7p, CDC15 - cdc15p, ESP1 - esp1p, SPC105 - spc105p, CEP3 - cep3p]
GO:0033044	regulation of chromosome organization	0.000143	0.00677	6.27	4095	125	47	9	[CDC45 - cdc45p, SCC2 - scc2p, KIN4 - kin4p, KIP3 - tubulin-dependent atpase kip3, TPD3 - tpd3p, GLC7 - glc7p, ESP1 - esp1p, SPC105 - spc105p, CEP3 - cep3p]
GO:0006360	transcription by RNA polymerase I	0.000148	0.00695	2.82	4095	27	860	16	[RRN7 - rrn7p, RRN9 - rrn9p, KIN28 - kin28p, RPA135 - rpa135p, RRN5 - rrn5p, SPT15 - spt15p, RPA49 - rpa49p, RRN6 - rrn6p, RPA43 - rpa43p, RPA14 - rpa14p, RPA34 - rpa34p, RRN11 - rrn11p, RPC40 - rpc40p, MOT1 - mot1p, RPA12 - rpa12p, RRN10 - rrn10p]
GO:0009303	rRNA transcription	0.000148	0.00688	2.82	4095	27	860	16	[RRN7 - rrn7p, RRN9 - rrn9p, RPA135 - rpa135p, RRN5 - rrn5p, SPT15 - spt15p, RPA49 - rpa49p, RRN6 - rrn6p, TFC7 - tfc7p, RPA14 - rpa14p, RPA43 - rpa43p, RPA34 - rpa34p, RRN11 - rrn11p, MOT1 - mot1p, TFC3 - tfc3p, RPA12 - rpa12p, RRN10 - rrn10p]
GO:0050658	RNA transport	0.000153	0.00704	1.89	4095	145	658	44	[RPS0B - ribosomal 40s subunit protein s0b, SSL2 - ssl2p, NUP2 - nup2p, SHE3 - she3p, YRA2 - yra2p, BCP1 - bcp1p, NPL3 - npl3p, MLP2 - mlp2p, SAC3 - sac3p, TIF6 - tif6p, NUP192 - nup192p, MYO4 - myosin 4, YJR084W - hypothetical protein, THP1 - thp1p, NUG1 - nug1p, YRB2 - yrb2p, GLE2 - gle2p, ARX1 - arx1p, STO1 - sto1p, RPS19B - ribosomal 40s subunit protein s19b, ENP1 - enp1p, RIX7 - putative aaa…
GO:0051236	establishment of RNA localization	0.000153	0.00697	1.89	4095	145	658	44	[RPS0B - ribosomal 40s subunit protein s0b, SSL2 - ssl2p, NUP2 - nup2p, SHE3 - she3p, YRA2 - yra2p, BCP1 - bcp1p, NPL3 - npl3p, MLP2 - mlp2p, SAC3 - sac3p, TIF6 - tif6p, NUP192 - nup192p, MYO4 - myosin 4, YJR084W - hypothetical protein, THP1 - thp1p, NUG1 - nug1p, YRB2 - yrb2p, GLE2 - gle2p, ARX1 - arx1p, STO1 - sto1p, RPS19B - ribosomal 40s subunit protein s19b, ENP1 - enp1p, RIX7 - putative aaa…
GO:0051315	attachment of mitotic spindle microtubules to kinetochore	0.000172	0.00777	5.57	4095	15	392	8	[NUF2 - nuf2p, MIF2 - mif2p, SPC105 - spc105p, DUO1 - duo1p, DAD3 - dad3p, ASK1 - ask1p, DAD2 - dad2p, TID3 - tid3p]
GO:0045787	positive regulation of cell cycle	0.000192	0.00857	3.12	4095	65	343	17	[NUP2 - nup2p, BUR2 - bur2p, SIP3 - sip3p, PSY4 - psy4p, SLT2 - slt2p, DAD3 - dad3p, CDC45 - cdc45p, SCC2 - scc2p, YRB2 - yrb2p, CKS1 - cks1p, GLC7 - glc7p, ESP1 - esp1p, PSY2 - psy2p, DUO1 - duo1p, ASK1 - ask1p, CDC14 - cdc14p, DAD2 - dad2p]
GO:0050657	nucleic acid transport	0.000223	0.00986	1.86	4095	147	658	44	[RPS0B - ribosomal 40s subunit protein s0b, SSL2 - ssl2p, NUP2 - nup2p, SHE3 - she3p, YRA2 - yra2p, BCP1 - bcp1p, NPL3 - npl3p, MLP2 - mlp2p, SAC3 - sac3p, TIF6 - tif6p, NUP192 - nup192p, MYO4 - myosin 4, YJR084W - hypothetical protein, THP1 - thp1p, NUG1 - nug1p, YRB2 - yrb2p, GLE2 - gle2p, ARX1 - arx1p, STO1 - sto1p, RPS19B - ribosomal 40s subunit protein s19b, ENP1 - enp1p, RIX7 - putative aaa…
GO:0090307	mitotic spindle assembly	0.000234	0.0103	38.15	4095	7	46	3	[KIP3 - tubulin-dependent atpase kip3, SPC97 - spc97p, KAR3 - kar3p]
GO:0000478	endonucleolytic cleavage involved in rRNA processing	0.000234	0.0102	2.73	4095	41	658	18	[RPL17A - ribosomal 60s subunit protein l17a, DBP8 - atp-dependent rna helicase dbp8, RPS0B - ribosomal 40s subunit protein s0b, RPS27B - ribosomal 40s subunit protein s27b, LAS1 - las1p, ESF2 - esf2p, LOC1 - loc1p, FCF2 - fcf2p, DBP3 - rna-dependent atpase dbp3, UTP18 - utp18p, UTP14 - utp14p, UTP10 - utp10p, RPS0A - ribosomal 40s subunit protein s0a, BUD21 - bud21p, BUD23 - bud23p, UTP6 - utp6p…
GO:0000479	endonucleolytic cleavage of tricistronic rRNA transcript (SSU-rRNA, 5.8S rRNA, LSU-rRNA)	0.000234	0.0101	2.73	4095	41	658	18	[RPS27B - ribosomal 40s subunit protein s27b, RPS0B - ribosomal 40s subunit protein s0b, DBP8 - atp-dependent rna helicase dbp8, RPL17A - ribosomal 60s subunit protein l17a, LAS1 - las1p, ESF2 - esf2p, LOC1 - loc1p, FCF2 - fcf2p, DBP3 - rna-dependent atpase dbp3, UTP18 - utp18p, UTP10 - utp10p, UTP14 - utp14p, RPS0A - ribosomal 40s subunit protein s0a, BUD21 - bud21p, BUD23 - bud23p, UTP6 - utp6p…
GO:0051028	mRNA transport	0.000236	0.0101	2.12	4095	91	658	31	[SSL2 - ssl2p, NUP2 - nup2p, SHE3 - she3p, YRA2 - yra2p, NPL3 - npl3p, MLP2 - mlp2p, SAC3 - sac3p, NUP192 - nup192p, MYO4 - myosin 4, YJR084W - hypothetical protein, THP1 - thp1p, GLE2 - gle2p, STO1 - sto1p, ENP1 - enp1p, GLE1 - gle1p, NDC1 - ndc1p, MEX67 - mex67p, YRA1 - yra1p, MLP1 - mlp1p, LOC1 - loc1p, DHH1 - dhh1p, SXM1 - sxm1p, NUP49 - nup49p, RPB4 - rpb4p, POM34 - pom34p, CRM1 - crm1p, BRL…
GO:0043254	regulation of protein complex assembly	0.000237	0.01	2.28	4095	86	563	27	[VRP1 - vrp1p, VPS41 - vps41p, KIP3 - tubulin-dependent atpase kip3, SLT2 - slt2p, RPT1 - proteasome regulatory particle base subunit rpt1, SEC6 - sec6p, VPS45 - vps45p, ARP2 - actin-related protein 2, BIM1 - bim1p, PEF1 - pef1p, PEP5 - pep5p, PEP3 - pep3p, DST1 - dst1p, RPT5 - proteasome regulatory particle base subunit rpt5, RPT4 - proteasome regulatory particle base subunit rpt4, SLY1 - sly1p,…
GO:0006468	protein phosphorylation	0.000246	0.0103	13.76	4095	124	12	5	[RAD53 - rad53p, KIN4 - kin4p, CDC15 - cdc15p, SNF4 - snf4p, GAL83 - gal83p]
GO:0001109	promoter clearance during DNA-templated transcription	0.000265	0.011	19.23	4095	3	213	3	[SSL2 - ssl2p, TAF14 - taf14p, TFG1 - tfg1p]
GO:0001111	promoter clearance from RNA polymerase II promoter	0.000265	0.011	19.23	4095	3	213	3	[SSL2 - ssl2p, TAF14 - taf14p, TFG1 - tfg1p]
GO:2000002	negative regulation of DNA damage checkpoint	0.000281	0.0115	94.14	4095	3	29	2	[PSY4 - psy4p, PSY2 - psy2p]
GO:0051252	regulation of RNA metabolic process	0.000287	0.0116	1.29	4095	623	909	179	[TFA2 - tfa2p, SNF6 - snf6p, HAP5 - hap5p, PCF11 - pcf11p, MRC1 - mrc1p, RSC8 - rsc8p, HIR2 - hir2p, KAR4 - kar4p, UTP10 - utp10p, ETT1 - ett1p, UTH1 - uth1p, CYC8 - cyc8p, CLA4 - cla4p, STB5 - stb5p, SUT1 - sut1p, DIG1 - dig1p, CAM1 - cam1p, SDC1 - sdc1p, MED2 - med2p, SPT10 - spt10p, SIR3 - sir3p, POL30 - pol30p, MLP1 - mlp1p, SKN7 - skn7p, MET30 - met30p, SNF4 - snf4p, SPT15 - spt15p, TAF6 - t…
GO:0045935	positive regulation of nucleobase-containing compound metabolic process	0.000301	0.0121	1.42	4095	330	909	104	[SNF6 - snf6p, HAP5 - hap5p, KAR4 - kar4p, SAW1 - saw1p, UTP10 - utp10p, ETT1 - ett1p, UTH1 - uth1p, CYC8 - cyc8p, SUT1 - sut1p, CAM1 - cam1p, MED2 - med2p, MLP1 - mlp1p, SIR3 - sir3p, POL30 - pol30p, SKN7 - skn7p, RFX1 - rfx1p, CST6 - cst6p, BCY1 - bcy1p, UTP15 - utp15p, CEG1 - ceg1p, NUT2 - nut2p, SWI6 - swi6p, SNF12 - snf12p, HOS3 - hos3p, AFT1 - aft1p, SDS3 - sds3p, KIN28 - kin28p, SIP3 - sip…
GO:0000278	mitotic cell cycle	0.000306	0.0122	4.42	4095	27	343	10	[NUF2 - nuf2p, REI1 - rei1p, YCS4 - ycs4p, POL30 - pol30p, SNF1 - snf1p, MTW1 - mtw1p, DUO1 - duo1p, KAR3 - kar3p, DAD2 - dad2p, CDC14 - cdc14p]
GO:0009304	tRNA transcription	0.000309	0.0122	6.2	4095	14	330	7	[RPC37 - rpc37p, RET1 - ret1p, RPC17 - rpc17p, RPC40 - rpc40p, DST1 - dst1p, TFC3 - tfc3p, RPC53 - rpc53p]
GO:0015931	nucleobase-containing compound transport	0.000328	0.0129	1.76	4095	174	669	50	[SSL2 - ssl2p, RPS0B - ribosomal 40s subunit protein s0b, NUP2 - nup2p, SHE3 - she3p, BCP1 - bcp1p, MLP2 - mlp2p, MYO4 - myosin 4, GLE2 - gle2p, THP1 - thp1p, NUG1 - nug1p, ARX1 - arx1p, STO1 - sto1p, RPS19B - ribosomal 40s subunit protein s19b, ENP1 - enp1p, RIX7 - putative aaa family atpase rix7, GLE1 - gle1p, NDC1 - ndc1p, MLP1 - mlp1p, YRA1 - yra1p, RPB4 - rpb4p, VPS28 - vps28p, CRM1 - crm1p,…
GO:0006406	mRNA export from nucleus	0.000353	0.0138	2.36	4095	61	654	23	[SSL2 - ssl2p, MEX67 - mex67p, NUP2 - nup2p, GLE1 - gle1p, YRA1 - yra1p, MLP1 - mlp1p, YRA2 - yra2p, NPL3 - npl3p, MLP2 - mlp2p, SXM1 - sxm1p, SAC3 - sac3p, NUP49 - nup49p, RPB4 - rpb4p, YJR084W - hypothetical protein, GLE2 - gle2p, THP1 - thp1p, CRM1 - crm1p, MTR2 - mtr2p, STO1 - sto1p, ZDS1 - zds1p, ENP1 - enp1p, THO2 - tho2p, NUP1 - nup1p]
GO:0060236	regulation of mitotic spindle organization	0.000372	0.0144	33.38	4095	8	46	3	[KIP3 - tubulin-dependent atpase kip3, ESP1 - esp1p, KAR3 - kar3p]
GO:0016071	mRNA metabolic process	0.000394	0.0151	1.45	4095	253	996	89	[MPE1 - mpe1p, PRP42 - prp42p, NOT5 - ccr4-not core subunit not5, PRP24 - prp24p, POP8 - pop8p, SLU7 - slu7p, PCF11 - pcf11p, CWC22 - cwc22p, PFS2 - pfs2p, BFR1 - bfr1p, THP1 - thp1p, LSM8 - lsm8p, LSM4 - lsm4p, MUD2 - mud2p, YTH1 - yth1p, NMD2 - nmd2p, STO1 - sto1p, LSM1 - lsm1p, GLE1 - gle1p, SIR3 - sir3p, CWC2 - cwc2p, PRP3 - prp3p, HSH49 - hsh49p, SKI3 - ski3p, RPP1 - rpp1p, RPB4 - rpb4p, MRS…
GO:0051254	positive regulation of RNA metabolic process	0.000399	0.0152	1.4	4095	307	999	105	[SNF6 - snf6p, HAP5 - hap5p, KAR4 - kar4p, UTP10 - utp10p, ETT1 - ett1p, UTH1 - uth1p, CYC8 - cyc8p, SUT1 - sut1p, SIF2 - sif2p, CAM1 - cam1p, MED2 - med2p, MLP1 - mlp1p, SIR3 - sir3p, SKN7 - skn7p, RFX1 - rfx1p, CST6 - cst6p, UTP15 - utp15p, CEG1 - ceg1p, NUT2 - nut2p, SWI6 - swi6p, SNF12 - snf12p, HOS3 - hos3p, AFT1 - aft1p, SDS3 - sds3p, KIN28 - kin28p, SIP3 - sip3p, NPL3 - npl3p, TBF1 - tbf1p…
GO:0051173	positive regulation of nitrogen compound metabolic process	0.000402	0.0152	1.33	4095	430	999	140	[SNF6 - snf6p, HAP5 - hap5p, SAW1 - saw1p, KAR4 - kar4p, ETT1 - ett1p, UTP10 - utp10p, KOG1 - kog1p, UTH1 - uth1p, CYC8 - cyc8p, CLA4 - cla4p, SIF2 - sif2p, SUT1 - sut1p, CAM1 - cam1p, MED2 - med2p, LST8 - lst8p, POL30 - pol30p, SIR3 - sir3p, MLP1 - mlp1p, SKN7 - skn7p, CDC20 - cdc20p, SNF4 - snf4p, RPB4 - rpb4p, RFX1 - rfx1p, CST6 - cst6p, BCY1 - bcy1p, UTP15 - utp15p, GLC7 - glc7p, CEG1 - ceg1p…
GO:0009987	cellular process	0.000413	0.0155	1.08	4095	3449	400	363	[NSA2 - nsa2p, TFA2 - tfa2p, LAS1 - las1p, SAP185 - sap185p, MRP10 - mitochondrial 37s ribosomal protein yms-t, MRC1 - mrc1p, PRE10 - proteasome core particle subunit alpha 7, SAM2 - methionine adenosyltransferase sam2, RPS16A - ribosomal 40s subunit protein s16a, MRF1 - mrf1p, SPC24 - spc24p, ARP2 - actin-related protein 2, GRH1 - grh1p, CPR6 - peptidylprolyl isomerase cpr6, MED2 - med2p, RPL27B…
GO:0071988	protein localization to spindle pole body	0.000425	0.0158	97.5	4095	4	21	2	[KIN4 - kin4p, BBP1 - bbp1p]
GO:0072698	protein localization to microtubule cytoskeleton	0.000425	0.0157	97.5	4095	4	21	2	[KIN4 - kin4p, BBP1 - bbp1p]
GO:1905508	protein localization to microtubule organizing center	0.000425	0.0156	97.5	4095	4	21	2	[KIN4 - kin4p, BBP1 - bbp1p]
GO:0000462	maturation of SSU-rRNA from tricistronic rRNA transcript (SSU-rRNA, 5.8S rRNA, LSU-rRNA)	0.000426	0.0155	2.4	4095	49	732	21	[ECM16 - ecm16p, RPS1B - ribosomal 40s subunit protein s1b, RPS27B - ribosomal 40s subunit protein s27b, FAF1 - faf1p, RPS9B - ribosomal 40s subunit protein s9b, RPS23B - ribosomal 40s subunit protein s23b, FAL1 - fal1p, RPS6A - ribosomal 40s subunit protein s6a, UTP4 - utp4p, RPS16A - ribosomal 40s subunit protein s16a, UTP10 - utp10p, RRP12 - rrp12p, FYV7 - fyv7p, BUD21 - bud21p, RIO2 - rio2p, …
GO:0005985	sucrose metabolic process	0.000429	0.0155	6.07	4095	5	675	5	[SWI3 - swi3p, SNF5 - snf5p, SNF6 - snf6p, SNF2 - snf2p, SWI1 - swi1p]
GO:0005987	sucrose catabolic process	0.000429	0.0154	6.07	4095	5	675	5	[SWI3 - swi3p, SNF5 - snf5p, SNF6 - snf6p, SNF2 - snf2p, SWI1 - swi1p]
GO:0006913	nucleocytoplasmic transport	0.000441	0.0157	2.32	4095	118	389	26	[SSL2 - ssl2p, RPS0B - ribosomal 40s subunit protein s0b, NUP2 - nup2p, SRP1 - srp1p, YRA2 - yra2p, BCP1 - bcp1p, NPL3 - npl3p, MLP2 - mlp2p, KAP120 - kap120p, REI1 - rei1p, YRB2 - yrb2p, CMD1 - cmd1p, THP1 - thp1p, RPS19B - ribosomal 40s subunit protein s19b, ENP1 - enp1p, NDC1 - ndc1p, GLE1 - gle1p, MEX67 - mex67p, YRA1 - yra1p, SXM1 - sxm1p, RPB4 - rpb4p, CRM1 - crm1p, MTR2 - mtr2p, MTR10 - mt…
GO:0051225	spindle assembly	0.000444	0.0157	16.19	4095	11	92	4	[SPC97 - spc97p, KIP3 - tubulin-dependent atpase kip3, SFI1 - sfi1p, KAR3 - kar3p]
GO:0051784	negative regulation of nuclear division	0.000447	0.0157	7.34	4095	61	64	7	[KIN4 - kin4p, SMC2 - condensin subunit smc2, MCM21 - mcm21p, TPD3 - tpd3p, GLC7 - glc7p, SPC105 - spc105p, CEP3 - cep3p]
GO:0031399	regulation of protein modification process	0.000469	0.0163	3.54	4095	135	120	14	[SLI15 - sli15p, SIP3 - sip3p, CDC12 - septin cdc12, CDC15 - cdc15p, SNF4 - snf4p, FPR4 - peptidylprolyl isomerase fpr4, TFG1 - tfg1p, GAL83 - gal83p, DOC1 - anaphase promoting complex subunit doc1, SCM3 - scm3p, GLC7 - glc7p, STE5 - ste5p, ESP1 - esp1p, ADA2 - ada2p]
GO:0010604	positive regulation of macromolecule metabolic process	0.000484	0.0167	1.33	4095	432	999	140	[SNF6 - snf6p, HAP5 - hap5p, SAW1 - saw1p, KAR4 - kar4p, ETT1 - ett1p, UTP10 - utp10p, KOG1 - kog1p, UTH1 - uth1p, CYC8 - cyc8p, CLA4 - cla4p, SIF2 - sif2p, SUT1 - sut1p, CAM1 - cam1p, MED2 - med2p, LST8 - lst8p, POL30 - pol30p, SIR3 - sir3p, MLP1 - mlp1p, SKN7 - skn7p, CDC20 - cdc20p, SNF4 - snf4p, RPB4 - rpb4p, RFX1 - rfx1p, CST6 - cst6p, UTP15 - utp15p, GLC7 - glc7p, CEG1 - ceg1p, NUT2 - nut2p…
GO:0051493	regulation of cytoskeleton organization	0.000486	0.0167	2.8	4095	73	360	18	[NUP2 - nup2p, KIP3 - tubulin-dependent atpase kip3, HOF1 - hof1p, DAD3 - dad3p, ARC40 - arc40p, IPL1 - ipl1p, ARC35 - arc35p, YRB2 - yrb2p, MDM20 - mdm20p, GLC7 - glc7p, ESP1 - esp1p, ARP2 - actin-related protein 2, DUO1 - duo1p, ASK1 - ask1p, KAR3 - kar3p, DMA1 - ubiquitin-conjugating protein dma1, BIM1 - bim1p, DAD2 - dad2p]
GO:0031334	positive regulation of protein complex assembly	0.0005	0.017	2.75	4095	45	563	17	[VRP1 - vrp1p, DST1 - dst1p, RPT5 - proteasome regulatory particle base subunit rpt5, RPT4 - proteasome regulatory particle base subunit rpt4, SLY1 - sly1p, DAD3 - dad3p, ARC40 - arc40p, LAS17 - las17p, RPT1 - proteasome regulatory particle base subunit rpt1, ARC35 - arc35p, VPS45 - vps45p, ARP2 - actin-related protein 2, DUO1 - duo1p, ASK1 - ask1p, DAD2 - dad2p, BIM1 - bim1p, SUB1 - sub1p]
GO:0019438	aromatic compound biosynthetic process	0.000501	0.017	1.27	4095	663	935	192	[TFA2 - tfa2p, SNF6 - snf6p, HAP5 - hap5p, PCF11 - pcf11p, RFA2 - rfa2p, RSC8 - rsc8p, HIR2 - hir2p, UTP10 - utp10p, ETT1 - ett1p, FOL3 - dihydrofolate synthase, RPA43 - rpa43p, CYC8 - cyc8p, ATP18 - atp18p, STB5 - stb5p, SUT1 - sut1p, MED2 - med2p, SIR3 - sir3p, POL30 - pol30p, SKN7 - skn7p, MET30 - met30p, URA2 - ura2p, SNF4 - snf4p, SPT15 - spt15p, RPB4 - rpb4p, TAF6 - taf6p, CST6 - cst6p, DPB…
GO:0051169	nuclear transport	0.000507	0.017	2.29	4095	114	408	26	[SSL2 - ssl2p, RPS0B - ribosomal 40s subunit protein s0b, NUP2 - nup2p, YRA2 - yra2p, BCP1 - bcp1p, NPL3 - npl3p, MLP2 - mlp2p, TIF6 - tif6p, YRB2 - yrb2p, NUG1 - nug1p, THP1 - thp1p, RPS19B - ribosomal 40s subunit protein s19b, ENP1 - enp1p, RIX7 - putative aaa family atpase rix7, NOG2 - nog2p, GLE1 - gle1p, MEX67 - mex67p, YRA1 - yra1p, SXM1 - sxm1p, RPB4 - rpb4p, BUD23 - bud23p, CRM1 - crm1p, …
GO:2000816	negative regulation of mitotic sister chromatid separation	0.000514	0.0172	11.77	4095	37	47	5	[KIN4 - kin4p, TPD3 - tpd3p, GLC7 - glc7p, SPC105 - spc105p, CEP3 - cep3p]
GO:0071174	mitotic spindle checkpoint	0.000514	0.017	11.77	4095	37	47	5	[KIN4 - kin4p, TPD3 - tpd3p, GLC7 - glc7p, SPC105 - spc105p, CEP3 - cep3p]
GO:1902100	negative regulation of metaphase/anaphase transition of cell cycle	0.000514	0.0169	11.77	4095	37	47	5	[KIN4 - kin4p, TPD3 - tpd3p, GLC7 - glc7p, SPC105 - spc105p, CEP3 - cep3p]
GO:0045841	negative regulation of mitotic metaphase/anaphase transition	0.000514	0.0168	11.77	4095	37	47	5	[KIN4 - kin4p, TPD3 - tpd3p, GLC7 - glc7p, SPC105 - spc105p, CEP3 - cep3p]
GO:1905819	negative regulation of chromosome separation	0.000514	0.0167	11.77	4095	37	47	5	[KIN4 - kin4p, TPD3 - tpd3p, GLC7 - glc7p, SPC105 - spc105p, CEP3 - cep3p]
GO:0031577	spindle checkpoint	0.000514	0.0166	11.77	4095	37	47	5	[KIN4 - kin4p, TPD3 - tpd3p, GLC7 - glc7p, SPC105 - spc105p, CEP3 - cep3p]
GO:0031325	positive regulation of cellular metabolic process	0.000576	0.0185	1.32	4095	451	999	145	[SNF6 - snf6p, HAP5 - hap5p, IML1 - iml1p, SAW1 - saw1p, KAR4 - kar4p, ETT1 - ett1p, UTP10 - utp10p, KOG1 - kog1p, UTH1 - uth1p, CYC8 - cyc8p, CLA4 - cla4p, SIF2 - sif2p, SUT1 - sut1p, CAM1 - cam1p, MED2 - med2p, LST8 - lst8p, POL30 - pol30p, SIR3 - sir3p, MLP1 - mlp1p, SKN7 - skn7p, SNF1 - snf1p, CDC20 - cdc20p, SNF4 - snf4p, RPB4 - rpb4p, RFX1 - rfx1p, CST6 - cst6p, BCY1 - bcy1p, UTP15 - utp15p…
GO:0090224	regulation of spindle organization	0.00058	0.0185	29.67	4095	9	46	3	[KIP3 - tubulin-dependent atpase kip3, ESP1 - esp1p, KAR3 - kar3p]
GO:0033048	negative regulation of mitotic sister chromatid segregation	0.000607	0.0192	11.46	4095	38	47	5	[KIN4 - kin4p, TPD3 - tpd3p, GLC7 - glc7p, SPC105 - spc105p, CEP3 - cep3p]
GO:0010468	regulation of gene expression	0.000617	0.0194	1.24	4095	777	915	216	[TFA2 - tfa2p, SNF6 - snf6p, MRC1 - mrc1p, HAP5 - hap5p, KAR4 - kar4p, UTP10 - utp10p, GLE2 - gle2p, UTH1 - uth1p, LSM4 - lsm4p, STO1 - sto1p, SUT1 - sut1p, MED2 - med2p, SDC1 - sdc1p, SPT10 - spt10p, MLP1 - mlp1p, SNF1 - snf1p, SKI3 - ski3p, SNF4 - snf4p, RPB4 - rpb4p, SPT15 - spt15p, TAF6 - taf6p, RFX1 - rfx1p, UTP15 - utp15p, GLC7 - glc7p, CEG1 - ceg1p, SNT2 - snt2p, DIG2 - dig2p, NUT2 - nut2p…
GO:0019219	regulation of nucleobase-containing compound metabolic process	0.000626	0.0195	1.26	4095	684	909	192	[TFA2 - tfa2p, SMC2 - condensin subunit smc2, SNF6 - snf6p, HAP5 - hap5p, MRC1 - mrc1p, PCF11 - pcf11p, RSC8 - rsc8p, HIR2 - hir2p, SAW1 - saw1p, KAR4 - kar4p, UTP10 - utp10p, ETT1 - ett1p, GPM2 - phosphoglycerate mutase family protein gpm2, UTH1 - uth1p, CYC8 - cyc8p, CLA4 - cla4p, STB5 - stb5p, SUT1 - sut1p, DIG1 - dig1p, CAM1 - cam1p, SDC1 - sdc1p, MED2 - med2p, SPT10 - spt10p, POL30 - pol30p,…
GO:0022414	reproductive process	0.000635	0.0197	1.91	4095	302	262	37	[LRG1 - lrg1p, BMH1 - bmh1p, SMC2 - condensin subunit smc2, SPC97 - spc97p, SPC98 - spc98p, CDC15 - cdc15p, RFA2 - rfa2p, VPS54 - vps54p, RVS161 - rvs161p, MYO4 - myosin 4, IPL1 - ipl1p, NUF2 - nuf2p, REI1 - rei1p, RMR1 - rmr1p, YCS4 - ycs4p, SSF1 - ssf1p, OKP1 - okp1p, STE5 - ste5p, ARP2 - actin-related protein 2, KAR3 - kar3p, CDC14 - cdc14p, DSN1 - dsn1p, FUS2 - fus2p, POL30 - pol30p, FAR8 - f…
GO:0030474	spindle pole body duplication	0.000639	0.0197	9.66	4095	13	163	5	[NDC1 - ndc1p, SPC42 - spc42p, SFI1 - sfi1p, SPC29 - spc29p, BBP1 - bbp1p]
GO:0051985	negative regulation of chromosome segregation	0.000692	0.0212	11.17	4095	39	47	5	[KIN4 - kin4p, TPD3 - tpd3p, GLC7 - glc7p, SPC105 - spc105p, CEP3 - cep3p]
GO:0033046	negative regulation of sister chromatid segregation	0.000692	0.0211	11.17	4095	39	47	5	[KIN4 - kin4p, TPD3 - tpd3p, GLC7 - glc7p, SPC105 - spc105p, CEP3 - cep3p]
GO:0044238	primary metabolic process	0.000702	0.0213	1.11	4095	2455	752	499	[TFA2 - tfa2p, ECM16 - ecm16p, LAS1 - las1p, MRP10 - mitochondrial 37s ribosomal protein yms-t, YMR134W - hypothetical protein, SNF6 - snf6p, MRC1 - mrc1p, RPS16A - ribosomal 40s subunit protein s16a, MRF1 - mrf1p, PBN1 - pbn1p, UTH1 - uth1p, STO1 - sto1p, SUT1 - sut1p, MED2 - med2p, MLP1 - mlp1p, PGM2 - phosphoglucomutase pgm2, RRP7 - rrp7p, CDC20 - cdc20p, SNF4 - snf4p, TAF6 - taf6p, NSA1 - nsa…
GO:0032887	regulation of spindle elongation	0.000711	0.0214	59.35	4095	3	46	2	[KIP3 - tubulin-dependent atpase kip3, ESP1 - esp1p]
GO:0032888	regulation of mitotic spindle elongation	0.000711	0.0212	59.35	4095	3	46	2	[KIP3 - tubulin-dependent atpase kip3, ESP1 - esp1p]
GO:0030490	maturation of SSU-rRNA	0.000716	0.0213	2.18	4095	59	763	24	[ECM16 - ecm16p, RPS1B - ribosomal 40s subunit protein s1b, RPS27B - ribosomal 40s subunit protein s27b, RPS9B - ribosomal 40s subunit protein s9b, FAF1 - faf1p, RPS23B - ribosomal 40s subunit protein s23b, FAL1 - fal1p, RPS6A - ribosomal 40s subunit protein s6a, UTP4 - utp4p, TSR4 - tsr4p, RPS16A - ribosomal 40s subunit protein s16a, UTP10 - utp10p, RRP12 - rrp12p, BUD21 - bud21p, FYV7 - fyv7p, …
GO:0051347	positive regulation of transferase activity	0.000759	0.0224	2.12	4095	45	986	23	[LST8 - lst8p, STE20 - ste20p, BUR2 - bur2p, SLI15 - sli15p, STE7 - ste7p, DBF4 - dbf4p, CDC12 - septin cdc12, SIP3 - sip3p, SSK2 - ssk2p, KIC1 - kic1p, CDC15 - cdc15p, CDC20 - cdc20p, CDC11 - cdc11p, SNF4 - snf4p, RPP2A - ribosomal protein p2a, KOG1 - kog1p, DOC1 - anaphase promoting complex subunit doc1, CCL1 - ccl1p, CKS1 - cks1p, CLB2 - clb2p, CLA4 - cla4p, SSK1 - ssk1p, MKK2 - mkk2p]
GO:0009893	positive regulation of metabolic process	0.000797	0.0234	1.31	4095	458	999	146	[SNF6 - snf6p, HAP5 - hap5p, IML1 - iml1p, SAW1 - saw1p, KAR4 - kar4p, ETT1 - ett1p, UTP10 - utp10p, KOG1 - kog1p, UTH1 - uth1p, CYC8 - cyc8p, CLA4 - cla4p, SIF2 - sif2p, SUT1 - sut1p, CAM1 - cam1p, MED2 - med2p, LST8 - lst8p, POL30 - pol30p, SIR3 - sir3p, MLP1 - mlp1p, SKN7 - skn7p, SNF1 - snf1p, CDC20 - cdc20p, SNF4 - snf4p, RPB4 - rpb4p, RFX1 - rfx1p, CST6 - cst6p, BCY1 - bcy1p, UTP15 - utp15p…
GO:1901977	negative regulation of cell cycle checkpoint	0.000809	0.0236	70.6	4095	4	29	2	[PSY4 - psy4p, PSY2 - psy2p]
GO:0000742	karyogamy involved in conjugation with cellular fusion	0.000817	0.0237	3.41	4095	12	900	9	[PRM2 - prm2p, FUS2 - fus2p, CMD1 - cmd1p, CIK1 - cik1p, BIK1 - bik1p, SPC110 - spc110p, KAR3 - kar3p, OSH3 - osh3p, KAR4 - kar4p]
GO:0051230	spindle disassembly	0.000848	0.0244	10.79	4095	6	253	4	[KIP3 - tubulin-dependent atpase kip3, CDC15 - cdc15p, IPL1 - ipl1p, CDC14 - cdc14p]
GO:0051640	organelle localization	0.000856	0.0245	1.71	4095	143	786	47	[KIP3 - tubulin-dependent atpase kip3, BCP1 - bcp1p, MLP2 - mlp2p, TIF6 - tif6p, VPS33 - vps33p, SEC1 - sec1p, NUP84 - nup84p, NUG1 - nug1p, YRB2 - yrb2p, MDM20 - mdm20p, ARX1 - arx1p, VPS45 - vps45p, ABF2 - abf2p, ARP2 - actin-related protein 2, ARC15 - arc15p, CLU1 - clu1p, KAR3 - kar3p, BIM1 - bim1p, DMA1 - ubiquitin-conjugating protein dma1, RIX7 - putative aaa family atpase rix7, KIP2 - kip2…
GO:0006996	organelle organization	0.000881	0.0251	2.35	4095	691	53	21	[SPC25 - spc25p, SMC2 - condensin subunit smc2, SPC97 - spc97p, KIP3 - tubulin-dependent atpase kip3, CBF2 - cbf2p, CDC12 - septin cdc12, MTW1 - mtw1p, CDC15 - cdc15p, RFA2 - rfa2p, SNF4 - snf4p, SPC29 - spc29p, TID3 - tid3p, CEP3 - cep3p, SCC2 - scc2p, NUF2 - nuf2p, CDC45 - cdc45p, SPC24 - spc24p, NSL1 - nsl1p, SPC105 - spc105p, ESP1 - esp1p, KAR3 - kar3p]
GO:0044087	regulation of cellular component biogenesis	0.0009	0.0255	1.88	4095	133	607	37	[VRP1 - vrp1p, VPS41 - vps41p, LRG1 - lrg1p, BDF1 - bdf1p, KIP3 - tubulin-dependent atpase kip3, SLT2 - slt2p, IPL1 - ipl1p, RPT1 - proteasome regulatory particle base subunit rpt1, SEC6 - sec6p, VPS45 - vps45p, ARP2 - actin-related protein 2, PEF1 - pef1p, DMA1 - ubiquitin-conjugating protein dma1, BIM1 - bim1p, FUS2 - fus2p, PEP5 - pep5p, PEP3 - pep3p, BIK1 - bik1p, DHH1 - dhh1p, HOF1 - hof1p, …
GO:1902850	microtubule cytoskeleton organization involved in mitosis	0.000938	0.0264	7.68	4095	33	97	6	[NUF2 - nuf2p, SPC97 - spc97p, KIP3 - tubulin-dependent atpase kip3, MYO2 - myosin 2, KAR3 - kar3p, STU2 - stu2p]
GO:0071173	spindle assembly checkpoint	0.000945	0.0265	15.15	4095	23	47	4	[TPD3 - tpd3p, GLC7 - glc7p, SPC105 - spc105p, CEP3 - cep3p]
GO:0007094	mitotic spindle assembly checkpoint	0.000945	0.0263	15.15	4095	23	47	4	[TPD3 - tpd3p, GLC7 - glc7p, SPC105 - spc105p, CEP3 - cep3p]
GO:0007052	mitotic spindle organization	0.000947	0.0262	9.92	4095	24	86	5	[NUF2 - nuf2p, KIP3 - tubulin-dependent atpase kip3, SPC97 - spc97p, KAR3 - kar3p, STU2 - stu2p]
GO:0001120	protein-DNA complex remodeling	0.00095	0.0261	10.99	4095	7	213	4	[SSL2 - ssl2p, TFA1 - tfa1p, ROX3 - rox3p, SUA7 - sua7p]
GO:0001112	DNA-templated transcriptional open complex formation	0.00095	0.026	10.99	4095	7	213	4	[SSL2 - ssl2p, TFA1 - tfa1p, ROX3 - rox3p, SUA7 - sua7p]

## Sheet: Nud1 Component
GO Term	Description	P-value	FDR q-value	Enrichment	N	B	n	b	Genes
GO:0032991	macromolecular complex	5.87e-32	5.9e-29	1.5	4095	1793	659	433	[ECM16 - ecm16p, TFA2 - tfa2p, LAS1 - las1p, SEC27 - sec27p, MRP10 - mitochondrial 37s ribosomal protein yms-t, SNF6 - snf6p, MRC1 - mrc1p, RPS16A - ribosomal 40s subunit protein s16a, PBN1 - pbn1p, SPC24 - spc24p, ARP2 - actin-related protein 2, STO1 - sto1p, MED2 - med2p, MLP1 - mlp1p, BIK1 - bik1p, RRP7 - rrp7p, CDC20 - cdc20p, SNF4 - snf4p, TAF6 - taf6p, NSA1 - nsa1p, NFS1 - nfs1p, RPL4B - ri…
GO:0044428	nuclear part	1.04e-31	5.24e-29	1.82	4095	963	675	289	[NSA2 - nsa2p, ECM16 - ecm16p, TFA2 - tfa2p, LAS1 - las1p, YMR134W - hypothetical protein, SNF6 - snf6p, HAP5 - hap5p, MRC1 - mrc1p, NOP56 - nop56p, UTP10 - utp10p, GLE2 - gle2p, RPA43 - rpa43p, SPC24 - spc24p, LSM4 - lsm4p, RSA3 - rsa3p, COS8 - cos8p, STO1 - sto1p, SDC1 - sdc1p, MED2 - med2p, LST8 - lst8p, MLP1 - mlp1p, BIK1 - bik1p, HSH49 - hsh49p, RRP7 - rrp7p, SNF1 - snf1p, CDC20 - cdc20p, SN…
GO:0043234	protein complex	2.26e-24	7.57e-22	2.02	4095	962	384	182	[TFA2 - tfa2p, SMC2 - condensin subunit smc2, SEC27 - sec27p, SPC97 - spc97p, MTW1 - mtw1p, PCF11 - pcf11p, MRC1 - mrc1p, RFA2 - rfa2p, PRE10 - proteasome core particle subunit alpha 7, MYO4 - myosin 4, PFS2 - pfs2p, PRE8 - proteasome core particle subunit alpha 2, KOG1 - kog1p, SPC24 - spc24p, ARP2 - actin-related protein 2, GRH1 - grh1p, DIG1 - dig1p, DSN1 - dsn1p, MED2 - med2p, POL30 - pol30p,…
GO:0005634	nucleus	3.1e-16	7.79e-14	1.45	4095	1817	440	284	[TFA2 - tfa2p, ECM16 - ecm16p, NSA2 - nsa2p, LAS1 - las1p, SNF6 - snf6p, MRC1 - mrc1p, PRE10 - proteasome core particle subunit alpha 7, SPC24 - spc24p, MED2 - med2p, HSH49 - hsh49p, RRP7 - rrp7p, YNL010W - hypothetical protein, SNF1 - snf1p, CDC20 - cdc20p, SNF4 - snf4p, RPB4 - rpb4p, SPT15 - spt15p, SCD5 - scd5p, NFS1 - nfs1p, RFX1 - rfx1p, YNL022C - hypothetical protein, PRP4 - prp4p, DPB2 - d…
GO:0044451	nucleoplasm part	2.9e-14	5.83e-12	2.91	4095	213	396	60	[TFA2 - tfa2p, SSL2 - ssl2p, MPE1 - mpe1p, MCM2 - mcm2p, SRB6 - srb6p, PGD1 - pgd1p, PCF11 - pcf11p, HFI1 - hfi1p, PFS2 - pfs2p, RET1 - ret1p, MUD2 - mud2p, YTH1 - yth1p, NOP10 - nop10p, CDC14 - cdc14p, MED2 - med2p, TFA1 - tfa1p, TAF9 - taf9p, RGR1 - rgr1p, UBP8 - ubp8p, RPB4 - rpb4p, SPT15 - spt15p, MED6 - med6p, SRB2 - srb2p, MED4 - med4p, RPC17 - rpc17p, GLC7 - glc7p, SNT2 - snt2p, MED1 - med…
GO:0000777	condensed chromosome kinetochore	4.75e-14	7.96e-12	13.72	4095	59	86	17	[DSN1 - dsn1p, SLI15 - sli15p, SPC25 - spc25p, MCM21 - mcm21p, CBF2 - cbf2p, KRE28 - kre28p, MTW1 - mtw1p, DAD3 - dad3p, STU2 - stu2p, CEP3 - cep3p, TID3 - tid3p, NUF2 - nuf2p, SPC24 - spc24p, OKP1 - okp1p, GLC7 - glc7p, NSL1 - nsl1p, SPC105 - spc105p]
GO:0000775	chromosome, centromeric region	6.57e-14	9.44e-12	12.22	4095	67	90	18	[DSN1 - dsn1p, SLI15 - sli15p, SPC25 - spc25p, MCM21 - mcm21p, CBF2 - cbf2p, KRE28 - kre28p, MTW1 - mtw1p, DAD3 - dad3p, STU2 - stu2p, CEP3 - cep3p, TID3 - tid3p, SCC2 - scc2p, NUF2 - nuf2p, SPC24 - spc24p, SCM3 - scm3p, OKP1 - okp1p, NSL1 - nsl1p, SPC105 - spc105p]
GO:0043228	non-membrane-bounded organelle	8.84e-14	1.11e-11	1.61	4095	890	610	214	[ECM16 - ecm16p, NSA2 - nsa2p, LAS1 - las1p, MRP10 - mitochondrial 37s ribosomal protein yms-t, MRC1 - mrc1p, RPL23B - ribosomal 60s subunit protein l23b, SAM2 - methionine adenosyltransferase sam2, RPS16A - ribosomal 40s subunit protein s16a, NOP56 - nop56p, UTP10 - utp10p, RPA43 - rpa43p, SPC24 - spc24p, ARP2 - actin-related protein 2, ALB1 - alb1p, RPL27B - ribosomal 60s subunit protein l27b, …
GO:0043232	intracellular non-membrane-bounded organelle	8.84e-14	9.88e-12	1.61	4095	890	610	214	[ECM16 - ecm16p, NSA2 - nsa2p, LAS1 - las1p, MRP10 - mitochondrial 37s ribosomal protein yms-t, MRC1 - mrc1p, RPL23B - ribosomal 60s subunit protein l23b, SAM2 - methionine adenosyltransferase sam2, RPS16A - ribosomal 40s subunit protein s16a, NOP56 - nop56p, UTP10 - utp10p, RPA43 - rpa43p, SPC24 - spc24p, ARP2 - actin-related protein 2, ALB1 - alb1p, RPL27B - ribosomal 60s subunit protein l27b, …
GO:0005815	microtubule organizing center	1.34e-13	1.35e-11	4.8	4095	68	389	31	[NUP2 - nup2p, SPC97 - spc97p, SPC98 - spc98p, CDC15 - cdc15p, MLP2 - mlp2p, STU2 - stu2p, SPC29 - spc29p, IPL1 - ipl1p, BBP1 - bbp1p, NUF2 - nuf2p, CMD1 - cmd1p, YRB2 - yrb2p, SPC105 - spc105p, KAR3 - kar3p, CDC14 - cdc14p, BIM1 - bim1p, NDC1 - ndc1p, CBF2 - cbf2p, KRE28 - kre28p, MOB1 - mob1p, KIN4 - kin4p, SPC42 - spc42p, STU1 - stu1p, CRM1 - crm1p, TPD3 - tpd3p, GLC7 - glc7p, AME1 - ame1p, ES…
GO:0000776	kinetochore	1.61e-13	1.47e-11	12.26	4095	66	86	17	[DSN1 - dsn1p, SLI15 - sli15p, SPC25 - spc25p, MCM21 - mcm21p, CBF2 - cbf2p, KRE28 - kre28p, MTW1 - mtw1p, DAD3 - dad3p, STU2 - stu2p, CEP3 - cep3p, TID3 - tid3p, NUF2 - nuf2p, SPC24 - spc24p, OKP1 - okp1p, GLC7 - glc7p, NSL1 - nsl1p, SPC105 - spc105p]
GO:0044798	nuclear transcription factor complex	5.46e-13	4.58e-11	2.7	4095	78	971	50	[TFA2 - tfa2p, HAP3 - hap3p, SSL2 - ssl2p, TFB5 - tfb5p, SRB6 - srb6p, TAF1 - taf1p, PGD1 - pgd1p, RRN9 - rrn9p, HAP5 - hap5p, RRN6 - rrn6p, MED2 - med2p, RRN7 - rrn7p, SRB4 - srb4p, TFA1 - tfa1p, TAF9 - taf9p, RGR1 - rgr1p, SPT15 - spt15p, TAF6 - taf6p, MED6 - med6p, SRB2 - srb2p, MED4 - med4p, INO2 - ino2p, GAL11 - gal11p, MED1 - med1p, HAP2 - hap2p, NUT2 - nut2p, SOH1 - soh1p, SWI6 - swi6p, RR…
GO:0044422	organelle part	1.56e-12	1.21e-10	1.24	4095	2350	659	470	[ECM16 - ecm16p, TFA2 - tfa2p, LAS1 - las1p, SEC27 - sec27p, NPC2 - npc2p, MRP10 - mitochondrial 37s ribosomal protein yms-t, SNF6 - snf6p, MRC1 - mrc1p, RPS16A - ribosomal 40s subunit protein s16a, PBN1 - pbn1p, SPC24 - spc24p, PMR1 - ca(2+)/mn(2+)-transporting p-type atpase pmr1, ARP2 - actin-related protein 2, COS8 - cos8p, STO1 - sto1p, MED2 - med2p, MLP1 - mlp1p, BIK1 - bik1p, RRP7 - rrp7p, …
GO:0005816	spindle pole body	1.94e-12	1.39e-10	17.7	4095	64	47	13	[SPC97 - spc97p, CBF2 - cbf2p, KRE28 - kre28p, CDC15 - cdc15p, SPC29 - spc29p, BBP1 - bbp1p, NUF2 - nuf2p, KIN4 - kin4p, TPD3 - tpd3p, GLC7 - glc7p, SPC105 - spc105p, ESP1 - esp1p, KAR3 - kar3p]
GO:0044446	intracellular organelle part	2.32e-12	1.55e-10	1.24	4095	2347	659	469	[ECM16 - ecm16p, TFA2 - tfa2p, LAS1 - las1p, SEC27 - sec27p, NPC2 - npc2p, MRP10 - mitochondrial 37s ribosomal protein yms-t, SNF6 - snf6p, MRC1 - mrc1p, RPS16A - ribosomal 40s subunit protein s16a, PBN1 - pbn1p, SPC24 - spc24p, PMR1 - ca(2+)/mn(2+)-transporting p-type atpase pmr1, ARP2 - actin-related protein 2, COS8 - cos8p, STO1 - sto1p, MED2 - med2p, MLP1 - mlp1p, BIK1 - bik1p, RRP7 - rrp7p, …
GO:0044430	cytoskeletal part	3.72e-12	2.34e-10	3.36	4095	199	263	43	[NUP2 - nup2p, IQG1 - iqg1p, KIP3 - tubulin-dependent atpase kip3, SPC97 - spc97p, MTW1 - mtw1p, CDC12 - septin cdc12, SPC98 - spc98p, CDC15 - cdc15p, RVS161 - rvs161p, STU2 - stu2p, SPC29 - spc29p, MYO4 - myosin 4, IPL1 - ipl1p, BBP1 - bbp1p, NUF2 - nuf2p, YRB2 - yrb2p, SFI1 - sfi1p, SPC105 - spc105p, ARP2 - actin-related protein 2, KAR3 - kar3p, BIM1 - bim1p, CDC14 - cdc14p, RGA2 - rga2p, DSN1 …
GO:0005667	transcription factor complex	3.88e-12	2.29e-10	2.54	4095	88	971	53	[TFA2 - tfa2p, HAP3 - hap3p, SSL2 - ssl2p, TFB5 - tfb5p, SRB6 - srb6p, TAF1 - taf1p, PGD1 - pgd1p, RRN9 - rrn9p, HAP5 - hap5p, RRN6 - rrn6p, MED2 - med2p, RRN7 - rrn7p, SRB4 - srb4p, TFA1 - tfa1p, TAF9 - taf9p, RGR1 - rgr1p, SPT15 - spt15p, TAF6 - taf6p, MED6 - med6p, SRB2 - srb2p, MED4 - med4p, INO2 - ino2p, GAL11 - gal11p, GLN3 - gln3p, HAP2 - hap2p, MED1 - med1p, NUT2 - nut2p, SOH1 - soh1p, SW…
GO:0090575	RNA polymerase II transcription factor complex	8.49e-12	4.74e-10	2.81	4095	63	971	42	[TFA2 - tfa2p, HAP3 - hap3p, SSL2 - ssl2p, TFB5 - tfb5p, SRB6 - srb6p, TAF10 - taf10p, TFB2 - tfb2p, TAF1 - taf1p, PGD1 - pgd1p, ROX3 - rox3p, RAD3 - rad3p, KIN28 - kin28p, HAP5 - hap5p, TAF14 - taf14p, MED8 - med8p, MED7 - med7p, CCL1 - ccl1p, CSE2 - cse2p, NRM1 - nrm1p, SIN4 - sin4p, TAF12 - taf12p, MED2 - med2p, SRB4 - srb4p, TFA1 - tfa1p, TAF9 - taf9p, RGR1 - rgr1p, TFG1 - tfg1p, SPT15 - spt1…
GO:0005694	chromosome	1.01e-11	5.36e-10	7.62	4095	125	86	20	[DSN1 - dsn1p, SLI15 - sli15p, SPC25 - spc25p, SMC2 - condensin subunit smc2, MCM21 - mcm21p, CBF2 - cbf2p, KRE28 - kre28p, MTW1 - mtw1p, RFA2 - rfa2p, DAD3 - dad3p, STU2 - stu2p, CEP3 - cep3p, TID3 - tid3p, NUF2 - nuf2p, SCC2 - scc2p, SPC24 - spc24p, OKP1 - okp1p, NSL1 - nsl1p, SPC105 - spc105p, PSY2 - psy2p]
GO:0000778	condensed nuclear chromosome kinetochore	4.22e-11	2.12e-09	19.55	4095	36	64	11	[NUF2 - nuf2p, SPC25 - spc25p, MCM21 - mcm21p, CBF2 - cbf2p, SPC24 - spc24p, KRE28 - kre28p, OKP1 - okp1p, GLC7 - glc7p, SPC105 - spc105p, CEP3 - cep3p, TID3 - tid3p]
GO:0005730	nucleolus	6.72e-11	3.22e-09	2.09	4095	233	674	80	[NSA2 - nsa2p, ECM16 - ecm16p, DBP8 - atp-dependent rna helicase dbp8, LAS1 - las1p, FAF1 - faf1p, RRN9 - rrn9p, FCF2 - fcf2p, RRP1 - rrp1p, RRP8 - rrp8p, NOP16 - nop16p, NOP56 - nop56p, RRN6 - rrn6p, UTP10 - utp10p, UTP14 - utp14p, NUG1 - nug1p, RPA43 - rpa43p, SSF1 - ssf1p, BRX1 - brx1p, LSM8 - lsm8p, LSM4 - lsm4p, ARX1 - arx1p, RSA3 - rsa3p, REX4 - rex4p, NOP10 - nop10p, ENP1 - enp1p, CDC14 - …
GO:0070847	core mediator complex	1.94e-10	8.89e-09	5.59	4095	21	593	17	[MED2 - med2p, SRB6 - srb6p, SRB4 - srb4p, PGD1 - pgd1p, ROX3 - rox3p, RGR1 - rgr1p, MED7 - med7p, MED6 - med6p, SRB2 - srb2p, MED4 - med4p, CSE2 - cse2p, SRB7 - srb7p, GAL11 - gal11p, MED1 - med1p, SIN4 - sin4p, NUT2 - nut2p, SOH1 - soh1p]
GO:0030684	preribosome	2.62e-10	1.15e-08	2.49	4095	135	658	54	[NSA2 - nsa2p, DBP8 - atp-dependent rna helicase dbp8, ECM16 - ecm16p, RPS0B - ribosomal 40s subunit protein s0b, LAS1 - las1p, RRP1 - rrp1p, RRP8 - rrp8p, RPS16A - ribosomal 40s subunit protein s16a, NOP16 - nop16p, NOP56 - nop56p, UTP14 - utp14p, UTP10 - utp10p, REI1 - rei1p, NUG1 - nug1p, SSF1 - ssf1p, BRX1 - brx1p, ARX1 - arx1p, RSA3 - rsa3p, ENP1 - enp1p, NOB1 - nob1p, RIX7 - putative aaa fa…
GO:0005849	mRNA cleavage factor complex	2.25e-09	9.44e-08	6.65	4095	15	534	13	[MPE1 - mpe1p, CFT2 - cft2p, HRP1 - hrp1p, RNA14 - rna14p, PCF11 - pcf11p, PAP1 - pap1p, CFT1 - cft1p, PFS2 - pfs2p, YSH1 - ysh1p, PTI1 - pti1p, PTA1 - pta1p, GLC7 - glc7p, YTH1 - yth1p]
GO:0016592	mediator complex	2.7e-09	1.09e-07	6.06	4095	26	416	16	[MED2 - med2p, SRB6 - srb6p, SRB4 - srb4p, PGD1 - pgd1p, ROX3 - rox3p, RGR1 - rgr1p, TAF14 - taf14p, MED7 - med7p, MED6 - med6p, SRB2 - srb2p, MED4 - med4p, CSE2 - cse2p, SRB7 - srb7p, MED1 - med1p, SIN4 - sin4p, SOH1 - soh1p]
GO:0098687	chromosomal region	5.38e-09	2.08e-07	5.84	4095	148	90	19	[DSN1 - dsn1p, SLI15 - sli15p, SPC25 - spc25p, MCM21 - mcm21p, CBF2 - cbf2p, KRE28 - kre28p, MTW1 - mtw1p, RFA2 - rfa2p, DAD3 - dad3p, STU2 - stu2p, CEP3 - cep3p, TID3 - tid3p, SCC2 - scc2p, NUF2 - nuf2p, SPC24 - spc24p, SCM3 - scm3p, OKP1 - okp1p, NSL1 - nsl1p, SPC105 - spc105p]
GO:0000779	condensed chromosome, centromeric region	1.44e-08	5.36e-07	8.21	4095	14	392	11	[NUF2 - nuf2p, YCS4 - ycs4p, SPC25 - spc25p, SPC24 - spc24p, MIF2 - mif2p, CBF2 - cbf2p, SCM3 - scm3p, CSE4 - cse4p, IPL1 - ipl1p, TID3 - tid3p, BUB1 - bub1p]
GO:0000922	spindle pole	2.61e-08	9.36e-07	6.99	4095	22	346	13	[DSN1 - dsn1p, SPC97 - spc97p, MTW1 - mtw1p, SPC98 - spc98p, CDC15 - cdc15p, STU2 - stu2p, NSL1 - nsl1p, SFI1 - sfi1p, DUO1 - duo1p, KAR3 - kar3p, BIM1 - bim1p, CDC14 - cdc14p, SWD1 - swd1p]
GO:0030687	preribosome, large subunit precursor	4.61e-08	1.6e-06	2.89	4095	69	658	32	[NSA2 - nsa2p, RPL17A - ribosomal 60s subunit protein l17a, LAS1 - las1p, NOP15 - nop15p, RRP1 - rrp1p, DBP3 - rna-dependent atpase dbp3, RPL35B - ribosomal 60s subunit protein l35b, RPL7A - ribosomal 60s subunit protein l7a, TIF6 - tif6p, RRP8 - rrp8p, NOP16 - nop16p, REI1 - rei1p, NUG1 - nug1p, SSF1 - ssf1p, BRX1 - brx1p, ARX1 - arx1p, RSA3 - rsa3p, YTM1 - ytm1p, MRT4 - mrt4p, RIX7 - putative a…
GO:0005813	centrosome	5.34e-08	1.79e-06	12.75	4095	10	257	8	[NUP2 - nup2p, YRB2 - yrb2p, SPC97 - spc97p, SPC98 - spc98p, ESP1 - esp1p, STU2 - stu2p, IPL1 - ipl1p, CDC14 - cdc14p]
GO:0005856	cytoskeleton	9.81e-08	3.18e-06	3.33	4095	149	239	29	[SPC97 - spc97p, KIP3 - tubulin-dependent atpase kip3, CDC12 - septin cdc12, MTW1 - mtw1p, SPC98 - spc98p, CDC15 - cdc15p, RVS161 - rvs161p, STU2 - stu2p, SPC29 - spc29p, IPL1 - ipl1p, BBP1 - bbp1p, SFI1 - sfi1p, SPC105 - spc105p, ARP2 - actin-related protein 2, KAR3 - kar3p, BIM1 - bim1p, RGA2 - rga2p, DYN3 - dynein light intermediate chain, NDC1 - ndc1p, SLI15 - sli15p, CBF2 - cbf2p, KRE28 - kr…
GO:0031262	Ndc80 complex	9.9e-08	3.11e-06	84	4095	5	39	4	[NUF2 - nuf2p, SPC25 - spc25p, SPC24 - spc24p, TID3 - tid3p]
GO:0000780	condensed nuclear chromosome, centromeric region	1.11e-07	3.38e-06	8.04	4095	13	392	10	[NUF2 - nuf2p, SPC25 - spc25p, SPC24 - spc24p, MIF2 - mif2p, CBF2 - cbf2p, SCM3 - scm3p, CSE4 - cse4p, IPL1 - ipl1p, TID3 - tid3p, BUB1 - bub1p]
GO:0005847	mRNA cleavage and polyadenylation specificity factor complex	5.21e-07	1.54e-05	6.39	4095	12	534	10	[MPE1 - mpe1p, CFT2 - cft2p, YSH1 - ysh1p, PTI1 - pti1p, PTA1 - pta1p, YTH1 - yth1p, GLC7 - glc7p, PAP1 - pap1p, CFT1 - cft1p, PFS2 - pfs2p]
GO:0044454	nuclear chromosome part	6.06e-07	1.74e-05	3.68	4095	272	90	22	[DSN1 - dsn1p, MCM2 - mcm2p, SPC25 - spc25p, SMC2 - condensin subunit smc2, MCM21 - mcm21p, CBF2 - cbf2p, KRE28 - kre28p, MTW1 - mtw1p, RFA2 - rfa2p, DAD3 - dad3p, STU2 - stu2p, TID3 - tid3p, CEP3 - cep3p, CDC45 - cdc45p, NUF2 - nuf2p, SCC2 - scc2p, SPC24 - spc24p, SCM3 - scm3p, OKP1 - okp1p, GLC7 - glc7p, NSL1 - nsl1p, SPC105 - spc105p]
GO:1990904	ribonucleoprotein complex	1.37e-06	3.84e-05	1.44	4095	595	762	159	[DBP8 - atp-dependent rna helicase dbp8, RPL29 - ribosomal 60s subunit protein l29, ECM16 - ecm16p, NSA2 - nsa2p, LAS1 - las1p, PRP42 - prp42p, SEC65 - sec65p, MRP10 - mitochondrial 37s ribosomal protein yms-t, RPL23B - ribosomal 60s subunit protein l23b, SAM2 - methionine adenosyltransferase sam2, RPS16A - ribosomal 40s subunit protein s16a, NOP56 - nop56p, UTP14 - utp14p, UTP10 - utp10p, KOG1 -…
GO:0030529	intracellular ribonucleoprotein complex	1.37e-06	3.73e-05	1.44	4095	595	762	159	[DBP8 - atp-dependent rna helicase dbp8, RPL29 - ribosomal 60s subunit protein l29, ECM16 - ecm16p, NSA2 - nsa2p, LAS1 - las1p, PRP42 - prp42p, SEC65 - sec65p, MRP10 - mitochondrial 37s ribosomal protein yms-t, RPL23B - ribosomal 60s subunit protein l23b, SAM2 - methionine adenosyltransferase sam2, RPS16A - ribosomal 40s subunit protein s16a, NOP56 - nop56p, UTP14 - utp14p, UTP10 - utp10p, KOG1 -…
GO:0031588	nucleotide-activated protein kinase complex	2.26e-06	5.99e-05	122.85	4095	4	25	3	[SNF1 - snf1p, SNF4 - snf4p, GAL83 - gal83p]
GO:0044427	chromosomal part	5.8e-06	0.00015	2.94	4095	387	90	25	[MCM2 - mcm2p, SMC2 - condensin subunit smc2, MTW1 - mtw1p, RFA2 - rfa2p, STU2 - stu2p, TID3 - tid3p, CDC45 - cdc45p, NUF2 - nuf2p, THP1 - thp1p, SPC24 - spc24p, SCM3 - scm3p, OKP1 - okp1p, SPC105 - spc105p, DSN1 - dsn1p, SPC25 - spc25p, SLI15 - sli15p, MCM21 - mcm21p, CBF2 - cbf2p, KRE28 - kre28p, DAD3 - dad3p, FPR4 - peptidylprolyl isomerase fpr4, CEP3 - cep3p, SCC2 - scc2p, GLC7 - glc7p, NSL1 …
GO:0043226	organelle	5.8e-06	0.000146	1.08	4095	3501	547	503	[TFA2 - tfa2p, ECM16 - ecm16p, LAS1 - las1p, SEC27 - sec27p, NPC2 - npc2p, MRP10 - mitochondrial 37s ribosomal protein yms-t, SNF6 - snf6p, MRC1 - mrc1p, MRF1 - mrf1p, RPS16A - ribosomal 40s subunit protein s16a, PBN1 - pbn1p, SPC24 - spc24p, ARP2 - actin-related protein 2, SUT1 - sut1p, MED2 - med2p, RRP7 - rrp7p, CDC20 - cdc20p, SNF4 - snf4p, TAF6 - taf6p, NSA1 - nsa1p, NFS1 - nfs1p, PRP4 - prp…
GO:0005641	nuclear envelope lumen	6.65e-06	0.000163	98.28	4095	5	25	3	[SNF1 - snf1p, SNF4 - snf4p, GAL83 - gal83p]
GO:0043229	intracellular organelle	1.2e-05	0.000287	1.08	4095	3500	547	503	[TFA2 - tfa2p, ECM16 - ecm16p, LAS1 - las1p, SEC27 - sec27p, NPC2 - npc2p, MRP10 - mitochondrial 37s ribosomal protein yms-t, SNF6 - snf6p, MRC1 - mrc1p, MRF1 - mrf1p, RPS16A - ribosomal 40s subunit protein s16a, PBN1 - pbn1p, SPC24 - spc24p, ARP2 - actin-related protein 2, SUT1 - sut1p, MED2 - med2p, RRP7 - rrp7p, CDC20 - cdc20p, SNF4 - snf4p, TAF6 - taf6p, NSA1 - nsa1p, NFS1 - nfs1p, PRP4 - prp…
GO:0044445	cytosolic part	1.57e-05	0.000368	1.75	4095	191	760	62	[RPL29 - ribosomal 60s subunit protein l29, RPS0B - ribosomal 40s subunit protein s0b, RPL23B - ribosomal 60s subunit protein l23b, PRE10 - proteasome core particle subunit alpha 7, RPS16A - ribosomal 40s subunit protein s16a, REI1 - rei1p, PRE8 - proteasome core particle subunit alpha 2, SCL1 - proteasome core particle subunit alpha 1, RPL16A - ribosomal 60s subunit protein l16a, ARX1 - arx1p, R…
GO:0005819	spindle	2.43e-05	0.000556	4.18	4095	40	343	14	[SLI15 - sli15p, CDC10 - septin cdc10, CBF2 - cbf2p, DAD3 - dad3p, STU2 - stu2p, IPL1 - ipl1p, STU1 - stu1p, ESP1 - esp1p, DUO1 - duo1p, KAR3 - kar3p, ASK1 - ask1p, DAD2 - dad2p, BIM1 - bim1p, CDC14 - cdc14p]
GO:0030686	90S preribosome	2.44e-05	0.000545	2.77	4095	59	577	23	[DBP8 - atp-dependent rna helicase dbp8, RPS0B - ribosomal 40s subunit protein s0b, ECM16 - ecm16p, RPS1B - ribosomal 40s subunit protein s1b, RPS9B - ribosomal 40s subunit protein s9b, ESF2 - esf2p, CIC1 - cic1p, SPB4 - spb4p, UTP4 - utp4p, RRP8 - rrp8p, UTP18 - utp18p, RPS16A - ribosomal 40s subunit protein s16a, NOP56 - nop56p, UTP10 - utp10p, RPS0A - ribosomal 40s subunit protein s0a, RPS7B -…
GO:0044452	nucleolar part	3.17e-05	0.000692	2.32	4095	64	801	29	[POP8 - pop8p, RRN9 - rrn9p, RPA49 - rpa49p, RRN6 - rrn6p, NOP56 - nop56p, UTP10 - utp10p, RPA43 - rpa43p, RPA14 - rpa14p, RRN11 - rrn11p, UTP6 - utp6p, UTP21 - utp21p, NOP10 - nop10p, CDC14 - cdc14p, YTM1 - ytm1p, RRN7 - rrn7p, RRP7 - rrp7p, NET1 - net1p, RPP1 - rpp1p, RRN5 - rrn5p, UTP4 - utp4p, SPT15 - spt15p, UTP18 - utp18p, CKA1 - cka1p, RPA34 - rpa34p, RPC40 - rpc40p, UTP15 - utp15p, SNM1 -…
GO:0016514	SWI/SNF complex	4.02e-05	0.000861	4.02	4095	12	848	10	[SNF12 - snf12p, SWI3 - swi3p, SNF5 - snf5p, ARP7 - arp7p, SNF6 - snf6p, TAF14 - taf14p, SNF2 - snf2p, SWP82 - swp82p, SWI1 - swi1p, SNF11 - snf11p]
GO:0097550	transcriptional preinitiation complex	9.28e-05	0.00195	13.21	4095	4	310	4	[TFA2 - tfa2p, SSL2 - ssl2p, TFA1 - tfa1p, SUA7 - sua7p]
GO:0000444	MIS12/MIND type complex	9.48e-05	0.00195	43.11	4095	5	57	3	[DSN1 - dsn1p, MTW1 - mtw1p, NSL1 - nsl1p]
GO:0000818	nuclear MIS12/MIND complex	9.48e-05	0.00191	43.11	4095	5	57	3	[DSN1 - dsn1p, MTW1 - mtw1p, NSL1 - nsl1p]
GO:0005874	microtubule	9.97e-05	0.00197	3.41	4095	56	343	16	[DYN3 - dynein light intermediate chain, SLI15 - sli15p, CDC10 - septin cdc10, SPC97 - spc97p, KIP3 - tubulin-dependent atpase kip3, SPC98 - spc98p, DAD3 - dad3p, STU2 - stu2p, IPL1 - ipl1p, NUF2 - nuf2p, STU1 - stu1p, DUO1 - duo1p, ASK1 - ask1p, KAR3 - kar3p, BIM1 - bim1p, DAD2 - dad2p]
GO:0000817	COMA complex	0.000124	0.0024	12.15	4095	4	337	4	[MCM21 - mcm21p, OKP1 - okp1p, AME1 - ame1p, CTF19 - ctf19p]
GO:0051233	spindle midzone	0.000127	0.00241	7.96	4095	9	343	6	[SLI15 - sli15p, KIP3 - tubulin-dependent atpase kip3, CBF2 - cbf2p, DAD2 - dad2p, BIM1 - bim1p, IPL1 - ipl1p]
GO:0022625	cytosolic large ribosomal subunit	0.000171	0.00319	2.17	4095	72	760	29	[RPL29 - ribosomal 60s subunit protein l29, RPL17A - ribosomal 60s subunit protein l17a, RPL21A - ribosomal 60s subunit protein l21a, RPL14A - ribosomal 60s subunit protein l14a, RPL17B - rpl17bp, RPL26B - ribosomal 60s subunit protein l26b, RPL35B - ribosomal 60s subunit protein l35b, RPL23B - ribosomal 60s subunit protein l23b, RPL7A - ribosomal 60s subunit protein l7a, REI1 - rei1p, RPL27A - r…
GO:1905368	peptidase complex	0.000217	0.00396	3.11	4095	69	324	17	[TAF10 - taf10p, CIC1 - cic1p, RPT5 - proteasome regulatory particle base subunit rpt5, UBP8 - ubp8p, HMG2 - hydroxymethylglutaryl-coa reductase (nadph) hmg2, PRE10 - proteasome core particle subunit alpha 7, RPN9 - proteasome regulatory particle lid subunit rpn9, HFI1 - hfi1p, PRE8 - proteasome core particle subunit alpha 2, PRE5 - proteasome core particle subunit alpha 6, RPT1 - proteasome regu…
GO:0019773	proteasome core complex, alpha-subunit complex	0.000247	0.00444	9.29	4095	7	315	5	[PRE8 - proteasome core particle subunit alpha 2, PRE5 - proteasome core particle subunit alpha 6, PRE6 - proteasome core particle subunit alpha 4, SCL1 - proteasome core particle subunit alpha 1, PRE10 - proteasome core particle subunit alpha 7]
GO:0030289	protein phosphatase 4 complex	0.000281	0.00495	94.14	4095	3	29	2	[PSY4 - psy4p, PSY2 - psy2p]
GO:0000120	RNA polymerase I transcription factor complex	0.00037	0.00642	4.47	4095	8	801	7	[RRN7 - rrn7p, RRN9 - rrn9p, RRN11 - rrn11p, RRN5 - rrn5p, SPT15 - spt15p, RRN6 - rrn6p, RRN10 - rrn10p]
GO:0000939	condensed chromosome inner kinetochore	0.000381	0.00649	71.84	4095	2	57	2	[DSN1 - dsn1p, SPC105 - spc105p]
GO:0000941	condensed nuclear chromosome inner kinetochore	0.000381	0.00638	71.84	4095	2	57	2	[DSN1 - dsn1p, SPC105 - spc105p]
GO:0044450	microtubule organizing center part	0.000486	0.00801	10.85	4095	17	111	5	[SPC42 - spc42p, SPC97 - spc97p, SFI1 - sfi1p, SPC29 - spc29p, BBP1 - bbp1p]
GO:0005823	central plaque of spindle pole body	0.000487	0.00791	4.54	4095	6	901	6	[CMD1 - cmd1p, SPC42 - spc42p, NBP1 - nbp1p, SPC110 - spc110p, SPC29 - spc29p, BBP1 - bbp1p]
GO:0099081	supramolecular polymer	0.000506	0.00808	2.34	4095	66	610	23	[VRP1 - vrp1p, DYN3 - dynein light intermediate chain, ELP2 - elongator subunit elp2, SLI15 - sli15p, BIK1 - bik1p, CDC10 - septin cdc10, KIP3 - tubulin-dependent atpase kip3, SPC97 - spc97p, SPC98 - spc98p, CDC11 - cdc11p, DAD3 - dad3p, STU2 - stu2p, LAS17 - las17p, IPL1 - ipl1p, NUF2 - nuf2p, SAC6 - sac6p, STU1 - stu1p, DUO1 - duo1p, KAR3 - kar3p, ASK1 - ask1p, NDL1 - ndl1p, BIM1 - bim1p, DAD2 …
GO:0099080	supramolecular complex	0.000506	0.00795	2.34	4095	66	610	23	[VRP1 - vrp1p, DYN3 - dynein light intermediate chain, ELP2 - elongator subunit elp2, SLI15 - sli15p, BIK1 - bik1p, CDC10 - septin cdc10, KIP3 - tubulin-dependent atpase kip3, SPC97 - spc97p, SPC98 - spc98p, CDC11 - cdc11p, DAD3 - dad3p, STU2 - stu2p, LAS17 - las17p, IPL1 - ipl1p, NUF2 - nuf2p, SAC6 - sac6p, STU1 - stu1p, DUO1 - duo1p, KAR3 - kar3p, ASK1 - ask1p, NDL1 - ndl1p, BIM1 - bim1p, DAD2 …
GO:0099513	polymeric cytoskeletal fiber	0.000506	0.00783	2.34	4095	66	610	23	[VRP1 - vrp1p, DYN3 - dynein light intermediate chain, ELP2 - elongator subunit elp2, SLI15 - sli15p, BIK1 - bik1p, CDC10 - septin cdc10, KIP3 - tubulin-dependent atpase kip3, SPC97 - spc97p, SPC98 - spc98p, CDC11 - cdc11p, DAD3 - dad3p, STU2 - stu2p, LAS17 - las17p, IPL1 - ipl1p, NUF2 - nuf2p, SAC6 - sac6p, STU1 - stu1p, DUO1 - duo1p, KAR3 - kar3p, ASK1 - ask1p, NDL1 - ndl1p, BIM1 - bim1p, DAD2 …
GO:0099512	supramolecular fiber	0.000506	0.00771	2.34	4095	66	610	23	[VRP1 - vrp1p, DYN3 - dynein light intermediate chain, ELP2 - elongator subunit elp2, SLI15 - sli15p, BIK1 - bik1p, CDC10 - septin cdc10, KIP3 - tubulin-dependent atpase kip3, SPC97 - spc97p, SPC98 - spc98p, CDC11 - cdc11p, DAD3 - dad3p, STU2 - stu2p, LAS17 - las17p, IPL1 - ipl1p, NUF2 - nuf2p, SAC6 - sac6p, STU1 - stu1p, DUO1 - duo1p, KAR3 - kar3p, ASK1 - ask1p, NDL1 - ndl1p, BIM1 - bim1p, DAD2 …
GO:0031207	Sec62/Sec63 complex	0.000585	0.00879	8.26	4095	4	496	4	[SEC66 - sec66p, SEC72 - sec72p, SEC62 - sec62p, SEC63 - sec63p]
GO:0000502	proteasome complex	0.000788	0.0117	3.53	4095	43	324	12	[PRE8 - proteasome core particle subunit alpha 2, PRE5 - proteasome core particle subunit alpha 6, RPT1 - proteasome regulatory particle base subunit rpt1, PRE6 - proteasome core particle subunit alpha 4, CIC1 - cic1p, SCL1 - proteasome core particle subunit alpha 1, RPT5 - proteasome regulatory particle base subunit rpt5, DOA4 - doa4p, UBC1 - e2 ubiquitin-conjugating protein ubc1, HMG2 - hydroxy…
GO:1905369	endopeptidase complex	0.000788	0.0115	3.53	4095	43	324	12	[RPT1 - proteasome regulatory particle base subunit rpt1, PRE5 - proteasome core particle subunit alpha 6, PRE8 - proteasome core particle subunit alpha 2, PRE6 - proteasome core particle subunit alpha 4, CIC1 - cic1p, SCL1 - proteasome core particle subunit alpha 1, RPT5 - proteasome regulatory particle base subunit rpt5, DOA4 - doa4p, UBC1 - e2 ubiquitin-conjugating protein ubc1, HMG2 - hydroxy…
GO:0008287	protein serine/threonine phosphatase complex	0.000938	0.0135	15.15	4095	23	47	4	[TPD3 - tpd3p, GLC7 - glc7p, PSY4 - psy4p, PSY2 - psy2p]
GO:1903293	phosphatase complex	0.000938	0.0133	15.15	4095	23	47	4	[TPD3 - tpd3p, GLC7 - glc7p, PSY4 - psy4p, PSY2 - psy2p]

## Sheet: Spc72 Process
GO Term	Description	P-value	FDR q-value	Enrichment	N	B	n	b	Genes
GO:0007020	microtubule nucleation	9.35e-13	4.6e-09	41.64	4011	17	51	9	[NUF2 - nuf2p, SPC42 - spc42p, SPC25 - spc25p, SPC24 - spc24p, SPC97 - spc97p, SPC105 - spc105p, SPC29 - spc29p, BIM1 - bim1p, TID3 - tid3p]
GO:0007049	cell cycle	2.97e-12	7.3e-09	3.91	4011	293	126	36	[RFA1 - rfa1p, MCM2 - mcm2p, IQG1 - iqg1p, CIK1 - cik1p, SMC2 - condensin subunit smc2, SPC97 - spc97p, MTW1 - mtw1p, CDC12 - septin cdc12, CIN8 - cin8p, CDC15 - cdc15p, CDC27 - anaphase promoting complex subunit cdc27, TID3 - tid3p, CDC23 - anaphase promoting complex subunit cdc23, CDC45 - cdc45p, NUF2 - nuf2p, RMR1 - rmr1p, YCS4 - ycs4p, SPC24 - spc24p, KAR3 - kar3p, BIM1 - bim1p, CDC14 - cdc14…
GO:0071824	protein-DNA complex subunit organization	1.35e-11	2.21e-08	3.13	4011	144	400	45	[MCM2 - mcm2p, TAF10 - taf10p, TAF1 - taf1p, IPI1 - ipi1p, IES3 - ies3p, POB3 - pob3p, ROX3 - rox3p, ORC2 - origin recognition complex subunit 2, SUA7 - sua7p, RSC8 - rsc8p, HIR2 - hir2p, SRB5 - srb5p, RRN6 - rrn6p, CDC45 - cdc45p, RSC58 - rsc58p, MCM4 - mcm4p, HIR1 - hir1p, CSE2 - cse2p, RRN11 - rrn11p, SPT6 - spt6p, ORC6 - origin recognition complex subunit 6, SIN4 - sin4p, TAF12 - taf12p, SSN2…
GO:0007017	microtubule-based process	2.53e-11	3.11e-08	11.33	4011	90	59	15	[SPC25 - spc25p, SPC97 - spc97p, CBF2 - cbf2p, SNF1 - snf1p, CDC15 - cdc15p, SPC29 - spc29p, BBP1 - bbp1p, TID3 - tid3p, NUF2 - nuf2p, SPC42 - spc42p, SPC24 - spc24p, SPC105 - spc105p, KAR3 - kar3p, CDC14 - cdc14p, BIM1 - bim1p]
GO:0032774	RNA biosynthetic process	4.49e-11	4.41e-08	2.61	4011	190	445	55	[TFB5 - tfb5p, TAF1 - taf1p, SUA7 - sua7p, RSC8 - rsc8p, HIR2 - hir2p, SRB5 - srb5p, RRN6 - rrn6p, RSC58 - rsc58p, HIR1 - hir1p, THP1 - thp1p, RPA43 - rpa43p, RET1 - ret1p, NUT1 - nut1p, SPT6 - spt6p, RNT1 - rnt1p, STB5 - stb5p, RPA190 - rpa190p, PAF1 - paf1p, SKN7 - skn7p, SRB4 - srb4p, ARP7 - arp7p, TAF9 - taf9p, SPT15 - spt15p, TAF7 - taf7p, SFH1 - sfh1p, MED4 - med4p, PTI1 - pti1p, RPC17 - rp…
GO:0000226	microtubule cytoskeleton organization	1.33e-10	1.09e-07	15.22	4011	62	51	12	[NUF2 - nuf2p, SPC42 - spc42p, SPC25 - spc25p, SPC24 - spc24p, SPC97 - spc97p, SNF1 - snf1p, CDC15 - cdc15p, SPC105 - spc105p, SPC29 - spc29p, CDC14 - cdc14p, BIM1 - bim1p, TID3 - tid3p]
GO:0071840	cellular component organization or biogenesis	1.4e-10	9.8e-08	1.37	4011	1528	499	261	[CIN1 - cin1p, YMR134W - hypothetical protein, UTP30 - utp30p, SNF6 - snf6p, MRC1 - mrc1p, YKE2 - yke2p, UTP10 - utp10p, GLE2 - gle2p, RPA43 - rpa43p, SEC13 - sec13p, SPC24 - spc24p, LSM4 - lsm4p, PKR1 - pkr1p, RPA190 - rpa190p, GRH1 - grh1p, SDC1 - sdc1p, MED2 - med2p, BIK1 - bik1p, SNF1 - snf1p, SEC10 - sec10p, SNF4 - snf4p, SPT15 - spt15p, SMX3 - smx3p, ERP3 - erp3p, DAD1 - dad1p, DPB2 - dpb2p…
GO:0022402	cell cycle process	1.48e-10	9.06e-08	3.09	4011	423	126	41	[RFA3 - rfa3p, RFA1 - rfa1p, MCM2 - mcm2p, IQG1 - iqg1p, SMC2 - condensin subunit smc2, CIK1 - cik1p, SPC97 - spc97p, CDC12 - septin cdc12, MTW1 - mtw1p, CIN8 - cin8p, CDC15 - cdc15p, RFA2 - rfa2p, SPC29 - spc29p, TID3 - tid3p, BBP1 - bbp1p, RMR1 - rmr1p, NUF2 - nuf2p, CDC45 - cdc45p, YCS4 - ycs4p, THP1 - thp1p, ORC6 - origin recognition complex subunit 6, SPC105 - spc105p, KAR3 - kar3p, BIM1 - b…
GO:0098789	pre-mRNA cleavage required for polyadenylation	1.65e-10	9.01e-08	44.78	4011	11	57	7	[MPE1 - mpe1p, CFT2 - cft2p, PTI1 - pti1p, PTA1 - pta1p, YTH1 - yth1p, CFT1 - cft1p, PFS2 - pfs2p]
GO:0006378	mRNA polyadenylation	3.9e-10	1.92e-07	29.71	4011	15	72	8	[MPE1 - mpe1p, CFT2 - cft2p, PTI1 - pti1p, PTA1 - pta1p, YTH1 - yth1p, PAP1 - pap1p, CFT1 - cft1p, PFS2 - pfs2p]
GO:0051301	cell division	4.59e-10	2.05e-07	4.65	4011	178	126	26	[IQG1 - iqg1p, SMC2 - condensin subunit smc2, CDC12 - septin cdc12, MTW1 - mtw1p, CDC15 - cdc15p, CIN8 - cin8p, CDC27 - anaphase promoting complex subunit cdc27, CDC23 - anaphase promoting complex subunit cdc23, TID3 - tid3p, NUF2 - nuf2p, YCS4 - ycs4p, SPC24 - spc24p, KAR3 - kar3p, CDC14 - cdc14p, BIM1 - bim1p, DSN1 - dsn1p, SPC25 - spc25p, MOB1 - mob1p, DAD3 - dad3p, CDC28 - cdc28p, SMC1 - cohe…
GO:0098787	mRNA cleavage involved in mRNA processing	4.71e-10	1.93e-07	41.05	4011	12	57	7	[MPE1 - mpe1p, CFT2 - cft2p, PTI1 - pti1p, PTA1 - pta1p, YTH1 - yth1p, CFT1 - cft1p, PFS2 - pfs2p]
GO:0007059	chromosome segregation	1.2e-09	4.55e-07	5.58	4011	100	151	21	[DSN1 - dsn1p, SPC25 - spc25p, SMC2 - condensin subunit smc2, CIK1 - cik1p, CBF2 - cbf2p, DAD4 - dad4p, MTW1 - mtw1p, CIN8 - cin8p, DAD3 - dad3p, SMC1 - cohesin subunit smc1, TID3 - tid3p, NUF2 - nuf2p, YCS4 - ycs4p, SPC24 - spc24p, CSE4 - cse4p, GLC7 - glc7p, NSL1 - nsl1p, ESP1 - esp1p, CDC14 - cdc14p, SOH1 - soh1p, DAD2 - dad2p]
GO:0065004	protein-DNA complex assembly	1.75e-09	6.14e-07	2.49	4011	98	773	47	[MCM2 - mcm2p, TAF10 - taf10p, TAF1 - taf1p, IPI1 - ipi1p, PGD1 - pgd1p, ROX3 - rox3p, ORC2 - origin recognition complex subunit 2, SUA7 - sua7p, HIR2 - hir2p, SPT16 - spt16p, SRB5 - srb5p, RRN6 - rrn6p, CDC45 - cdc45p, VPS75 - vps75p, MCM4 - mcm4p, HIR1 - hir1p, NAP1 - nap1p, BUR6 - bur6p, CSE2 - cse2p, RRN11 - rrn11p, SPT6 - spt6p, ORC6 - origin recognition complex subunit 6, SIN4 - sin4p, TFC3…
GO:0016072	rRNA metabolic process	1.98e-09	6.5e-07	1.87	4011	242	778	88	[RPS0B - ribosomal 40s subunit protein s0b, DBP8 - atp-dependent rna helicase dbp8, FAF1 - faf1p, LAS1 - las1p, HCR1 - hcr1p, IPI1 - ipi1p, FUN12 - fun12p, UTP30 - utp30p, FCF2 - fcf2p, SNF6 - snf6p, ZUO1 - zuo1p, PWP1 - pwp1p, RRN6 - rrn6p, GAR1 - gar1p, UTP10 - utp10p, NUG1 - nug1p, RPA43 - rpa43p, KRI1 - kri1p, LSM4 - lsm4p, RRP4 - rrp4p, RNT1 - rnt1p, RPS21A - ribosomal 40s subunit protein s2…
GO:1903047	mitotic cell cycle process	2.58e-09	7.92e-07	3.55	4011	278	126	31	[IQG1 - iqg1p, MCM2 - mcm2p, SMC2 - condensin subunit smc2, CIK1 - cik1p, SPC97 - spc97p, MTW1 - mtw1p, CDC12 - septin cdc12, CIN8 - cin8p, CDC15 - cdc15p, TID3 - tid3p, CDC45 - cdc45p, NUF2 - nuf2p, YCS4 - ycs4p, THP1 - thp1p, SPC105 - spc105p, KAR3 - kar3p, BIM1 - bim1p, CDC14 - cdc14p, DSN1 - dsn1p, NDC1 - ndc1p, MET30 - met30p, CBF2 - cbf2p, SNF1 - snf1p, CDC28 - cdc28p, SMC1 - cohesin subuni…
GO:0006379	mRNA cleavage	4.63e-09	1.34e-06	32.84	4011	15	57	7	[MPE1 - mpe1p, CFT2 - cft2p, PTI1 - pti1p, PTA1 - pta1p, YTH1 - yth1p, CFT1 - cft1p, PFS2 - pfs2p]
GO:0006351	transcription, DNA-templated	7.77e-09	2.12e-06	2.9	4011	118	445	38	[TFB5 - tfb5p, BDF1 - bdf1p, TAF10 - taf10p, TAF1 - taf1p, KIN28 - kin28p, UAF30 - uaf30p, HIR2 - hir2p, RPA49 - rpa49p, RRN6 - rrn6p, HIR1 - hir1p, RPA43 - rpa43p, RPA14 - rpa14p, RET1 - ret1p, NUT1 - nut1p, RRN11 - rrn11p, SPT6 - spt6p, RNT1 - rnt1p, STB5 - stb5p, PAF1 - paf1p, RPA190 - rpa190p, RPC53 - rpc53p, TAF12 - taf12p, RPC37 - rpc37p, RPB7 - rpb7p, SKN7 - skn7p, TAF9 - taf9p, RPO31 - rp…
GO:0097659	nucleic acid-templated transcription	7.77e-09	2.01e-06	2.9	4011	118	445	38	[TFB5 - tfb5p, BDF1 - bdf1p, TAF10 - taf10p, TAF1 - taf1p, KIN28 - kin28p, UAF30 - uaf30p, HIR2 - hir2p, RPA49 - rpa49p, RRN6 - rrn6p, HIR1 - hir1p, RPA43 - rpa43p, RPA14 - rpa14p, RET1 - ret1p, NUT1 - nut1p, RRN11 - rrn11p, SPT6 - spt6p, RNT1 - rnt1p, STB5 - stb5p, PAF1 - paf1p, RPA190 - rpa190p, RPC53 - rpc53p, TAF12 - taf12p, RPB7 - rpb7p, RPC37 - rpc37p, SKN7 - skn7p, TAF9 - taf9p, RPO31 - rp…
GO:0016043	cellular component organization	8.91e-09	2.19e-06	1.36	4011	1396	499	237	[CIN1 - cin1p, YMR134W - hypothetical protein, SNF6 - snf6p, MRC1 - mrc1p, YKE2 - yke2p, GLE2 - gle2p, SEC13 - sec13p, SPC24 - spc24p, LSM4 - lsm4p, PKR1 - pkr1p, GRH1 - grh1p, MED2 - med2p, SDC1 - sdc1p, BIK1 - bik1p, SNF1 - snf1p, SEC10 - sec10p, SNF4 - snf4p, SPT15 - spt15p, SMX3 - smx3p, ERP3 - erp3p, DAD1 - dad1p, DPB2 - dpb2p, GLC7 - glc7p, ISW2 - isw2p, SNT2 - snt2p, PRP16 - deah-box rna h…
GO:0043631	RNA polyadenylation	1.46e-08	3.4e-06	21.22	4011	21	72	8	[MPE1 - mpe1p, CFT2 - cft2p, PTI1 - pti1p, PTA1 - pta1p, YTH1 - yth1p, PAP1 - pap1p, CFT1 - cft1p, PFS2 - pfs2p]
GO:0070897	transcription preinitiation complex assembly	2.83e-08	6.31e-06	4.64	4011	54	320	20	[MED2 - med2p, TAF1 - taf1p, TAF10 - taf10p, SRB4 - srb4p, TAF9 - taf9p, ROX3 - rox3p, SUA7 - sua7p, TFG1 - tfg1p, SPT15 - spt15p, RRN6 - rrn6p, MED6 - med6p, TAF7 - taf7p, CSE2 - cse2p, TFC8 - tfc8p, RRN11 - rrn11p, GAL11 - gal11p, SIN4 - sin4p, NUT2 - nut2p, SSN2 - ssn2p, TAF12 - taf12p]
GO:0051123	RNA polymerase II preinitiation complex assembly	8.89e-08	1.9e-05	5.07	4011	42	320	17	[MED2 - med2p, TAF10 - taf10p, TAF1 - taf1p, SRB4 - srb4p, TAF9 - taf9p, ROX3 - rox3p, SUA7 - sua7p, SPT15 - spt15p, TFG1 - tfg1p, TAF7 - taf7p, MED6 - med6p, CSE2 - cse2p, GAL11 - gal11p, SIN4 - sin4p, NUT2 - nut2p, SSN2 - ssn2p, TAF12 - taf12p]
GO:0090304	nucleic acid metabolic process	9.26e-08	1.9e-05	1.45	4011	927	526	176	[DBP8 - atp-dependent rna helicase dbp8, LAS1 - las1p, PRP42 - prp42p, FUN12 - fun12p, UTP30 - utp30p, SNF6 - snf6p, MRC1 - mrc1p, RSC8 - rsc8p, RFA2 - rfa2p, HIR2 - hir2p, VTS1 - vts1p, PWP1 - pwp1p, SRB5 - srb5p, PFS2 - pfs2p, UTP10 - utp10p, RPA43 - rpa43p, NUT1 - nut1p, LSM4 - lsm4p, SPT6 - spt6p, STB5 - stb5p, RPS21A - ribosomal 40s subunit protein s21a, RPA190 - rpa190p, MET30 - met30p, SKN…
GO:0000070	mitotic sister chromatid segregation	1.04e-07	2.05e-05	10.98	4011	29	126	10	[DSN1 - dsn1p, YCS4 - ycs4p, SMC2 - condensin subunit smc2, CIK1 - cik1p, MTW1 - mtw1p, CSE4 - cse4p, NSL1 - nsl1p, CIN8 - cin8p, ESP1 - esp1p, SMC1 - cohesin subunit smc1]
GO:0098781	ncRNA transcription	1.17e-07	2.2e-05	4.11	4011	45	434	20	[BDF1 - bdf1p, RPC37 - rpc37p, RPO31 - rpo31p, UAF30 - uaf30p, RRN5 - rrn5p, SPT15 - spt15p, RPA49 - rpa49p, RRN6 - rrn6p, RPA14 - rpa14p, RPA43 - rpa43p, RET1 - ret1p, RPC17 - rpc17p, TFC8 - tfc8p, CSE4 - cse4p, RRN11 - rrn11p, RNT1 - rnt1p, RPA190 - rpa190p, PAF1 - paf1p, RPC53 - rpc53p, RRN10 - rrn10p]
GO:0043933	protein-containing complex subunit organization	1.17e-07	2.14e-05	1.54	4011	516	703	139	[CIN1 - cin1p, SNL1 - snl1p, PRP42 - prp42p, FUN12 - fun12p, RTN1 - rtn1p, MTW1 - mtw1p, INO80 - chromatin-remodeling atpase ino80, RSC8 - rsc8p, VOA1 - voa1p, HIR2 - hir2p, VMA21 - vma21p, YKE2 - yke2p, SRB5 - srb5p, SEC13 - sec13p, LSM4 - lsm4p, SPT6 - spt6p, RSA3 - rsa3p, PKR1 - pkr1p, NUP57 - nup57p, MED2 - med2p, CBF2 - cbf2p, RRP7 - rrp7p, NOG1 - nog1p, SPT15 - spt15p, RPL6B - ribosomal 60s…
GO:0031124	mRNA 3'-end processing	2.91e-07	5.1e-05	15.37	4011	29	72	8	[MPE1 - mpe1p, CFT2 - cft2p, PTI1 - pti1p, PTA1 - pta1p, YTH1 - yth1p, PAP1 - pap1p, CFT1 - cft1p, PFS2 - pfs2p]
GO:0006996	organelle organization	3.38e-07	5.72e-05	2.19	4011	675	130	48	[RFA3 - rfa3p, RFA1 - rfa1p, NUP2 - nup2p, MCM2 - mcm2p, SMC2 - condensin subunit smc2, CIK1 - cik1p, SPC97 - spc97p, DID4 - did4p, CDC12 - septin cdc12, MTW1 - mtw1p, CIN8 - cin8p, CDC15 - cdc15p, RFA2 - rfa2p, SPC29 - spc29p, TID3 - tid3p, NUF2 - nuf2p, CDC45 - cdc45p, YCS4 - ycs4p, GLE2 - gle2p, VPS20 - vps20p, THP1 - thp1p, SPC24 - spc24p, SNF7 - snf7p, SPC105 - spc105p, PEX25 - pex25p, KAR3 …
GO:0000819	sister chromatid segregation	3.99e-07	6.53e-05	8.39	4011	36	146	11	[DSN1 - dsn1p, YCS4 - ycs4p, CIK1 - cik1p, SMC2 - condensin subunit smc2, MTW1 - mtw1p, CSE4 - cse4p, NSL1 - nsl1p, CIN8 - cin8p, ESP1 - esp1p, SOH1 - soh1p, SMC1 - cohesin subunit smc1]
GO:0098813	nuclear chromosome segregation	4.01e-07	6.35e-05	7.49	4011	44	146	12	[DSN1 - dsn1p, NUF2 - nuf2p, YCS4 - ycs4p, SMC2 - condensin subunit smc2, CIK1 - cik1p, MTW1 - mtw1p, CSE4 - cse4p, NSL1 - nsl1p, CIN8 - cin8p, ESP1 - esp1p, SOH1 - soh1p, SMC1 - cohesin subunit smc1]
GO:0006355	regulation of transcription, DNA-templated	4.37e-07	6.72e-05	1.68	4011	505	458	97	[SNF6 - snf6p, HAP5 - hap5p, RSC8 - rsc8p, HIR2 - hir2p, YKE2 - yke2p, SRB5 - srb5p, UTP10 - utp10p, SWI4 - swi4p, SEC13 - sec13p, NUT1 - nut1p, SPT6 - spt6p, STB5 - stb5p, MED2 - med2p, SDC1 - sdc1p, MET30 - met30p, SKN7 - skn7p, SNF4 - snf4p, LEU3 - leu3p, SPT15 - spt15p, CKA1 - cka1p, BCY1 - bcy1p, UTP15 - utp15p, GLC7 - glc7p, ISW2 - isw2p, SNT2 - snt2p, GCR1 - gcr1p, DIG2 - dig2p, NUT2 - nut…
GO:0031123	RNA 3'-end processing	5.36e-07	7.99e-05	3.15	4011	58	549	25	[RPS0B - ribosomal 40s subunit protein s0b, MPE1 - mpe1p, CFT2 - cft2p, RRP42 - rrp42p, RNA14 - rna14p, HRP1 - hrp1p, PAP1 - pap1p, CFT1 - cft1p, PFS2 - pfs2p, MTR3 - mtr3p, MTR4 - mtr4p, THP1 - thp1p, YSH1 - ysh1p, PTA1 - pta1p, YTH1 - yth1p, RNT1 - rnt1p, RPS21A - ribosomal 40s subunit protein s21a, PAF1 - paf1p, RRP43 - rrp43p, SKI6 - ski6p, RPS21B - rps21bp, REF2 - ref2p, PTI1 - pti1p, PAP2 -…
GO:0016070	RNA metabolic process	5.44e-07	7.86e-05	1.54	4011	697	483	129	[DBP8 - atp-dependent rna helicase dbp8, LAS1 - las1p, PRP42 - prp42p, FUN12 - fun12p, UTP30 - utp30p, SNF6 - snf6p, RSC8 - rsc8p, HIR2 - hir2p, SRB5 - srb5p, VTS1 - vts1p, PFS2 - pfs2p, UTP10 - utp10p, RPA43 - rpa43p, NUT1 - nut1p, LSM4 - lsm4p, SPT6 - spt6p, STB5 - stb5p, RPA190 - rpa190p, SKN7 - skn7p, HSH49 - hsh49p, NOG1 - nog1p, MRS3 - mrs3p, SPT15 - spt15p, SMX3 - smx3p, PRP4 - prp4p, BUD2…
GO:0033036	macromolecule localization	5.51e-07	7.73e-05	1.74	4011	601	330	86	[NUP2 - nup2p, NMD3 - nmd3p, MTW1 - mtw1p, SRP1 - srp1p, RFA2 - rfa2p, YET1 - yet1p, SPC1 - spc1p, MYO4 - myosin 4, NMD5 - nmd5p, TID3 - tid3p, BBP1 - bbp1p, MSN5 - msn5p, NUG1 - nug1p, THP1 - thp1p, GLE2 - gle2p, SEC13 - sec13p, KAP95 - kap95p, PEX14 - pex14p, ARX1 - arx1p, SNF7 - snf7p, COG4 - cog4p, BIM1 - bim1p, VID24 - glucose-induced degradation complex subunit vid24, APL6 - apl6p, SSH1 - s…
GO:0051276	chromosome organization	5.68e-07	7.75e-05	3.35	4011	205	146	25	[RFA3 - rfa3p, RFA1 - rfa1p, MCM2 - mcm2p, NUP2 - nup2p, SMC2 - condensin subunit smc2, CIK1 - cik1p, MTW1 - mtw1p, CIN8 - cin8p, RFA2 - rfa2p, NUF2 - nuf2p, CDC45 - cdc45p, YCS4 - ycs4p, GLE2 - gle2p, THP1 - thp1p, KAR3 - kar3p, BIM1 - bim1p, DSN1 - dsn1p, SMC1 - cohesin subunit smc1, BUB1 - bub1p, CDC28 - cdc28p, CSE4 - cse4p, GLC7 - glc7p, NSL1 - nsl1p, ESP1 - esp1p, SOH1 - soh1p]
GO:2001141	regulation of RNA biosynthetic process	6.21e-07	8.25e-05	1.67	4011	508	458	97	[SNF6 - snf6p, HAP5 - hap5p, RSC8 - rsc8p, HIR2 - hir2p, YKE2 - yke2p, SRB5 - srb5p, SWI4 - swi4p, UTP10 - utp10p, SEC13 - sec13p, NUT1 - nut1p, SPT6 - spt6p, STB5 - stb5p, MED2 - med2p, SDC1 - sdc1p, MET30 - met30p, SKN7 - skn7p, SNF4 - snf4p, LEU3 - leu3p, SPT15 - spt15p, CKA1 - cka1p, BCY1 - bcy1p, UTP15 - utp15p, GLC7 - glc7p, ISW2 - isw2p, SNT2 - snt2p, GCR1 - gcr1p, DIG2 - dig2p, NUT2 - nut…
GO:1903506	regulation of nucleic acid-templated transcription	6.21e-07	8.03e-05	1.67	4011	508	458	97	[SNF6 - snf6p, HAP5 - hap5p, RSC8 - rsc8p, HIR2 - hir2p, YKE2 - yke2p, SRB5 - srb5p, UTP10 - utp10p, SWI4 - swi4p, SEC13 - sec13p, NUT1 - nut1p, SPT6 - spt6p, STB5 - stb5p, MED2 - med2p, SDC1 - sdc1p, MET30 - met30p, SKN7 - skn7p, SNF4 - snf4p, LEU3 - leu3p, SPT15 - spt15p, CKA1 - cka1p, BCY1 - bcy1p, UTP15 - utp15p, GLC7 - glc7p, ISW2 - isw2p, SNT2 - snt2p, GCR1 - gcr1p, DIG2 - dig2p, NUT2 - nut…
GO:1902680	positive regulation of RNA biosynthetic process	8.12e-07	0.000102	1.75	4011	296	628	81	[HAP3 - hap3p, SRB6 - srb6p, TAF1 - taf1p, SNF5 - snf5p, PGD1 - pgd1p, SNF6 - snf6p, INO80 - chromatin-remodeling atpase ino80, HAP5 - hap5p, YKE2 - yke2p, NUP100 - nup100p, SRB5 - srb5p, UTP10 - utp10p, SWI4 - swi4p, SOK2 - sok2p, GZF3 - gzf3p, SEC13 - sec13p, GCN5 - gcn5p, SPT6 - spt6p, FHL1 - fhl1p, PAF1 - paf1p, MED2 - med2p, SRB4 - srb4p, SKN7 - skn7p, ARP7 - arp7p, TAF9 - taf9p, RGR1 - rgr1…
GO:1903508	positive regulation of nucleic acid-templated transcription	8.12e-07	9.97e-05	1.75	4011	296	628	81	[HAP3 - hap3p, SRB6 - srb6p, TAF1 - taf1p, SNF5 - snf5p, PGD1 - pgd1p, SNF6 - snf6p, INO80 - chromatin-remodeling atpase ino80, HAP5 - hap5p, YKE2 - yke2p, NUP100 - nup100p, SRB5 - srb5p, UTP10 - utp10p, SWI4 - swi4p, SOK2 - sok2p, GZF3 - gzf3p, SEC13 - sec13p, GCN5 - gcn5p, SPT6 - spt6p, FHL1 - fhl1p, PAF1 - paf1p, MED2 - med2p, SRB4 - srb4p, SKN7 - skn7p, ARP7 - arp7p, TAF9 - taf9p, RGR1 - rgr1…
GO:0008608	attachment of spindle microtubules to kinetochore	8.58e-07	0.000103	4.7	4011	30	427	15	[DSN1 - dsn1p, HRR25 - hrr25p, MIF2 - mif2p, DAD4 - dad4p, DAD3 - dad3p, IPL1 - ipl1p, TID3 - tid3p, CDC28 - cdc28p, BUB1 - bub1p, NUF2 - nuf2p, DAD1 - dad1p, BIR1 - bir1p, AME1 - ame1p, SPC105 - spc105p, DAD2 - dad2p]
GO:0032886	regulation of microtubule-based process	1.07e-06	0.000125	9.96	4011	24	151	9	[CIK1 - cik1p, CLB2 - clb2p, DAD4 - dad4p, ESP1 - esp1p, DAD3 - dad3p, KAR3 - kar3p, BIM1 - bim1p, DAD2 - dad2p, CDC28 - cdc28p]
GO:0070507	regulation of microtubule cytoskeleton organization	1.07e-06	0.000122	9.96	4011	24	151	9	[CIK1 - cik1p, CLB2 - clb2p, DAD4 - dad4p, ESP1 - esp1p, DAD3 - dad3p, KAR3 - kar3p, DAD2 - dad2p, BIM1 - bim1p, CDC28 - cdc28p]
GO:0051641	cellular localization	1.69e-06	0.000189	1.63	4011	696	347	98	[NMD3 - nmd3p, MTW1 - mtw1p, MYO4 - myosin 4, NMD5 - nmd5p, GLE2 - gle2p, SEC13 - sec13p, SNA2 - sna2p, SPT6 - spt6p, VID24 - glucose-induced degradation complex subunit vid24, RIX7 - putative aaa family atpase rix7, TRS31 - trs31p, BIK1 - bik1p, SNF1 - snf1p, SEC10 - sec10p, ERP3 - erp3p, VPS60 - vps60p, CRN1 - crn1p, BCY1 - bcy1p, GLC7 - glc7p, TRS23 - trs23p, VPS35 - vps35p, VPS21 - vps21p, CI…
GO:0007010	cytoskeleton organization	2.12e-06	0.000231	4.85	4011	147	90	16	[SPC25 - spc25p, SPC97 - spc97p, CBF2 - cbf2p, SNF1 - snf1p, CDC12 - septin cdc12, CIN8 - cin8p, CDC15 - cdc15p, SPC29 - spc29p, CDC28 - cdc28p, TID3 - tid3p, NUF2 - nuf2p, SPC42 - spc42p, SPC24 - spc24p, SPC105 - spc105p, CDC14 - cdc14p, BIM1 - bim1p]
GO:0051254	positive regulation of RNA metabolic process	2.17e-06	0.000232	1.71	4011	307	628	82	[HAP3 - hap3p, SRB6 - srb6p, TAF1 - taf1p, SNF5 - snf5p, PGD1 - pgd1p, SNF6 - snf6p, INO80 - chromatin-remodeling atpase ino80, HAP5 - hap5p, YKE2 - yke2p, NUP100 - nup100p, SRB5 - srb5p, UTP10 - utp10p, SWI4 - swi4p, SOK2 - sok2p, GZF3 - gzf3p, SEC13 - sec13p, GCN5 - gcn5p, SPT6 - spt6p, FHL1 - fhl1p, PAF1 - paf1p, MED2 - med2p, SRB4 - srb4p, SKN7 - skn7p, ARP7 - arp7p, TAF9 - taf9p, RGR1 - rgr1…
GO:0051252	regulation of RNA metabolic process	2.37e-06	0.000248	1.52	4011	538	609	124	[SNF6 - snf6p, INO80 - chromatin-remodeling atpase ino80, MRC1 - mrc1p, HAP5 - hap5p, RSC8 - rsc8p, HIR2 - hir2p, YKE2 - yke2p, SRB5 - srb5p, VTS1 - vts1p, SWI4 - swi4p, UTP10 - utp10p, GZF3 - gzf3p, SEC13 - sec13p, NUT1 - nut1p, SPT6 - spt6p, STB5 - stb5p, MED2 - med2p, SDC1 - sdc1p, SKN7 - skn7p, MET30 - met30p, LEU3 - leu3p, SNF4 - snf4p, SPT15 - spt15p, CKA1 - cka1p, CST6 - cst6p, BCY1 - bcy1…
GO:0007051	spindle organization	2.55e-06	0.000261	9.48	4011	32	119	9	[NUF2 - nuf2p, NDC1 - ndc1p, CIK1 - cik1p, SPC97 - spc97p, CIN8 - cin8p, CDC15 - cdc15p, BIM1 - bim1p, CDC14 - cdc14p, CDC28 - cdc28p]
GO:0042790	nucleolar large rRNA transcription by RNA polymerase I	2.88e-06	0.000289	6.2	4011	15	431	10	[RPA43 - rpa43p, RPA14 - rpa14p, RRN11 - rrn11p, UAF30 - uaf30p, RPA190 - rpa190p, RRN5 - rrn5p, SPT15 - spt15p, RPA49 - rpa49p, RRN10 - rrn10p, RRN6 - rrn6p]
GO:0009303	rRNA transcription	2.89e-06	0.000284	9.03	4011	27	148	9	[RPA14 - rpa14p, CSE4 - cse4p, RRN11 - rrn11p, RNT1 - rnt1p, RPA190 - rpa190p, RRN5 - rrn5p, SPT15 - spt15p, RRN10 - rrn10p, RRN6 - rrn6p]
GO:0045893	positive regulation of transcription, DNA-templated	3.2e-06	0.000308	1.72	4011	290	618	77	[HAP3 - hap3p, SRB6 - srb6p, TAF1 - taf1p, SNF5 - snf5p, PGD1 - pgd1p, SNF6 - snf6p, INO80 - chromatin-remodeling atpase ino80, HAP5 - hap5p, YKE2 - yke2p, NUP100 - nup100p, SRB5 - srb5p, UTP10 - utp10p, SWI4 - swi4p, SOK2 - sok2p, GZF3 - gzf3p, SEC13 - sec13p, GCN5 - gcn5p, SPT6 - spt6p, FHL1 - fhl1p, PAF1 - paf1p, MED2 - med2p, SRB4 - srb4p, SKN7 - skn7p, ARP7 - arp7p, TAF9 - taf9p, RGR1 - rgr1…
GO:0045944	positive regulation of transcription by RNA polymerase II	3.91e-06	0.00037	1.77	4011	257	618	70	[HAP3 - hap3p, SRB6 - srb6p, TAF1 - taf1p, SNF5 - snf5p, PGD1 - pgd1p, SNF6 - snf6p, INO80 - chromatin-remodeling atpase ino80, HAP5 - hap5p, YKE2 - yke2p, SRB5 - srb5p, SWI4 - swi4p, SOK2 - sok2p, GZF3 - gzf3p, GCN5 - gcn5p, SPT6 - spt6p, FHL1 - fhl1p, PAF1 - paf1p, MED2 - med2p, SRB4 - srb4p, SKN7 - skn7p, ARP7 - arp7p, TAF9 - taf9p, RGR1 - rgr1p, LEU3 - leu3p, RGT1 - rgt1p, MED6 - med6p, CST6 …
GO:0006352	DNA-templated transcription, initiation	4.04e-06	0.000374	6.01	4011	23	319	11	[RPB7 - rpb7p, TAF10 - taf10p, SRB4 - srb4p, RPC17 - rpc17p, TAF9 - taf9p, RRN11 - rrn11p, TFG1 - tfg1p, SPT15 - spt15p, TAF12 - taf12p, RRN6 - rrn6p, TAF7 - taf7p]
GO:0008104	protein localization	4.2e-06	0.000382	1.7	4011	578	330	81	[NUP2 - nup2p, NMD3 - nmd3p, MTW1 - mtw1p, SRP1 - srp1p, RFA2 - rfa2p, YET1 - yet1p, SPC1 - spc1p, NMD5 - nmd5p, TID3 - tid3p, BBP1 - bbp1p, MSN5 - msn5p, NUG1 - nug1p, GLE2 - gle2p, SEC13 - sec13p, KAP95 - kap95p, PEX14 - pex14p, ARX1 - arx1p, SNF7 - snf7p, COG4 - cog4p, BIM1 - bim1p, VID24 - glucose-induced degradation complex subunit vid24, SSH1 - ssh1p, APL6 - apl6p, RIX7 - putative aaa famil…
GO:0010564	regulation of cell cycle process	4.47e-06	0.000399	3.46	4011	169	151	22	[SMC2 - condensin subunit smc2, CIK1 - cik1p, DAD4 - dad4p, CDC15 - cdc15p, MOB1 - mob1p, DAD3 - dad3p, CDC28 - cdc28p, CDC23 - anaphase promoting complex subunit cdc23, BUB1 - bub1p, CDC45 - cdc45p, MDS3 - mds3p, YCS4 - ycs4p, KIN4 - kin4p, CLB2 - clb2p, GLC7 - glc7p, ESP1 - esp1p, SPC105 - spc105p, DBF2 - dbf2p, KAR3 - kar3p, BIM1 - bim1p, CDC14 - cdc14p, DAD2 - dad2p]
GO:0006357	regulation of transcription by RNA polymerase II	5e-06	0.000438	1.75	4011	382	437	73	[HAP3 - hap3p, TFB5 - tfb5p, SRB6 - srb6p, TAF1 - taf1p, SNF5 - snf5p, SNF6 - snf6p, HIR2 - hir2p, YKE2 - yke2p, SRB5 - srb5p, SWI4 - swi4p, SOK2 - sok2p, HIR1 - hir1p, NUT1 - nut1p, GCN5 - gcn5p, SPT6 - spt6p, STB5 - stb5p, FHL1 - fhl1p, PAF1 - paf1p, MED2 - med2p, SRB4 - srb4p, SKN7 - skn7p, ARP7 - arp7p, TAF9 - taf9p, RGR1 - rgr1p, SNF4 - snf4p, LEU3 - leu3p, TAF7 - taf7p, MED6 - med6p, SFH1 -…
GO:0051983	regulation of chromosome segregation	5.33e-06	0.000459	2.96	4011	65	500	24	[DSL1 - dsl1p, DAD4 - dad4p, BUB3 - bub3p, CDC26 - anaphase promoting complex subunit cdc26, CTF19 - ctf19p, DAD3 - dad3p, IPL1 - ipl1p, BUB1 - bub1p, CEP3 - cep3p, CDC28 - cdc28p, CDC23 - anaphase promoting complex subunit cdc23, SCC2 - scc2p, DAD1 - dad1p, KIN4 - kin4p, BIR1 - bir1p, CLB2 - clb2p, TPD3 - tpd3p, GLC7 - glc7p, ESP1 - esp1p, SPC105 - spc105p, IES6 - ies6p, DMA1 - ubiquitin-conjuga…
GO:0045935	positive regulation of nucleobase-containing compound metabolic process	5.36e-06	0.000454	1.65	4011	326	643	86	[HAP3 - hap3p, SRB6 - srb6p, TAF1 - taf1p, SNF5 - snf5p, PGD1 - pgd1p, SNF6 - snf6p, INO80 - chromatin-remodeling atpase ino80, HAP5 - hap5p, YKE2 - yke2p, VTS1 - vts1p, NUP100 - nup100p, SRB5 - srb5p, UTP10 - utp10p, SWI4 - swi4p, SOK2 - sok2p, GZF3 - gzf3p, SEC13 - sec13p, GCN5 - gcn5p, SPT6 - spt6p, FHL1 - fhl1p, PAF1 - paf1p, RIX7 - putative aaa family atpase rix7, MED2 - med2p, SRB4 - srb4p,…
GO:0006364	rRNA processing	5.51e-06	0.000459	1.74	4011	205	778	69	[RPS0B - ribosomal 40s subunit protein s0b, DBP8 - atp-dependent rna helicase dbp8, LAS1 - las1p, FAF1 - faf1p, HCR1 - hcr1p, IPI1 - ipi1p, FUN12 - fun12p, UTP30 - utp30p, FCF2 - fcf2p, SNF6 - snf6p, ZUO1 - zuo1p, PWP1 - pwp1p, GAR1 - gar1p, UTP10 - utp10p, NUG1 - nug1p, LSM4 - lsm4p, RRP4 - rrp4p, KRI1 - kri1p, RNT1 - rnt1p, RPS21A - ribosomal 40s subunit protein s21a, PAF1 - paf1p, NOP10 - nop1…
GO:0050789	regulation of biological process	6.51e-06	0.000533	1.27	4011	1310	610	254	[SNF6 - snf6p, INO80 - chromatin-remodeling atpase ino80, SHO1 - sho1p, MRC1 - mrc1p, HAP5 - hap5p, YKE2 - yke2p, VTS1 - vts1p, UTP10 - utp10p, SWI4 - swi4p, GZF3 - gzf3p, GLE2 - gle2p, SEC13 - sec13p, NUT1 - nut1p, LSM4 - lsm4p, PDI1 - protein disulfide isomerase pdi1, SDC1 - sdc1p, MED2 - med2p, UBP3 - ubp3p, BIK1 - bik1p, SNF1 - snf1p, SNF4 - snf4p, SPP41 - spp41p, SPT15 - spt15p, DAD1 - dad1p…
GO:0048522	positive regulation of cellular process	6.62e-06	0.000533	1.47	4011	581	609	130	[CLB1 - clb1p, BUB3 - bub3p, SNF6 - snf6p, INO80 - chromatin-remodeling atpase ino80, SHO1 - sho1p, HAP5 - hap5p, YKE2 - yke2p, SRB5 - srb5p, VTS1 - vts1p, UTP10 - utp10p, SWI4 - swi4p, GZF3 - gzf3p, SEC13 - sec13p, SPT6 - spt6p, PAN1 - pan1p, CDC14 - cdc14p, RIX7 - putative aaa family atpase rix7, MED2 - med2p, SKN7 - skn7p, SNF1 - snf1p, LEU3 - leu3p, SNF4 - snf4p, DAD1 - dad1p, CRN1 - crn1p, C…
GO:0051229	meiotic spindle disassembly	6.84e-06	0.000542	364.64	4011	2	11	2	[CDC15 - cdc15p, CDC14 - cdc14p]
GO:0090501	RNA phosphodiester bond hydrolysis	9.08e-06	0.000708	1.92	4011	111	924	49	[DBP8 - atp-dependent rna helicase dbp8, RPS0B - ribosomal 40s subunit protein s0b, LAS1 - las1p, MPE1 - mpe1p, FCF2 - fcf2p, PCF11 - pcf11p, PFS2 - pfs2p, RPL37B - ribosomal 60s subunit protein l37b, UTP10 - utp10p, KRI1 - kri1p, RRP4 - rrp4p, YTH1 - yth1p, RNT1 - rnt1p, RPS21A - ribosomal 40s subunit protein s21a, NOP10 - nop10p, ENP1 - enp1p, NHP2 - nhp2p, RPS21B - rps21bp, DOM34 - dom34p, NOP…
GO:0072698	protein localization to microtubule cytoskeleton	1.05e-05	0.000806	32.61	4011	6	82	4	[KIN4 - kin4p, BIM1 - bim1p, BBP1 - bbp1p, CDC28 - cdc28p]
GO:0048518	positive regulation of biological process	1.07e-05	0.000807	1.46	4011	597	609	132	[CLB1 - clb1p, BUB3 - bub3p, SNF6 - snf6p, INO80 - chromatin-remodeling atpase ino80, SHO1 - sho1p, HAP5 - hap5p, YKE2 - yke2p, SRB5 - srb5p, VTS1 - vts1p, SWI4 - swi4p, UTP10 - utp10p, GZF3 - gzf3p, SEC13 - sec13p, SPT6 - spt6p, PAN1 - pan1p, CDC14 - cdc14p, RIX7 - putative aaa family atpase rix7, MED2 - med2p, SKN7 - skn7p, SNF1 - snf1p, LEU3 - leu3p, SNF4 - snf4p, DAD1 - dad1p, CRN1 - crn1p, C…
GO:0010468	regulation of gene expression	1.09e-05	0.000808	1.41	4011	690	622	151	[FUN12 - fun12p, SNF6 - snf6p, INO80 - chromatin-remodeling atpase ino80, MRC1 - mrc1p, HAP5 - hap5p, RSC8 - rsc8p, HIR2 - hir2p, YKE2 - yke2p, SRB5 - srb5p, VTS1 - vts1p, UTP10 - utp10p, SWI4 - swi4p, GZF3 - gzf3p, GLE2 - gle2p, SEC13 - sec13p, NUT1 - nut1p, LSM4 - lsm4p, SPT6 - spt6p, GCD6 - gcd6p, STB5 - stb5p, MED2 - med2p, SDC1 - sdc1p, MET30 - met30p, SKN7 - skn7p, SNF1 - snf1p, LEU3 - leu3…
GO:0019219	regulation of nucleobase-containing compound metabolic process	1.35e-05	0.000988	1.54	4011	592	463	105	[SMC2 - condensin subunit smc2, SNF6 - snf6p, HAP5 - hap5p, RSC8 - rsc8p, HIR2 - hir2p, YKE2 - yke2p, SRB5 - srb5p, SWI4 - swi4p, UTP10 - utp10p, SEC13 - sec13p, NUT1 - nut1p, SPT6 - spt6p, STB5 - stb5p, RIX7 - putative aaa family atpase rix7, MED2 - med2p, SDC1 - sdc1p, SKN7 - skn7p, MET30 - met30p, SNF4 - snf4p, LEU3 - leu3p, SPT15 - spt15p, CKA1 - cka1p, BCY1 - bcy1p, UTP15 - utp15p, GLC7 - gl…
GO:0006611	protein export from nucleus	1.49e-05	0.00107	4.11	4011	45	325	15	[RIX7 - putative aaa family atpase rix7, NUP2 - nup2p, MEX67 - mex67p, NMD3 - nmd3p, NIC96 - nic96p, BUD20 - bud20p, TIF6 - tif6p, MSN5 - msn5p, NUG1 - nug1p, NOP9 - nop9p, CSE1 - cse1p, BUD23 - bud23p, MTR2 - mtr2p, ARX1 - arx1p, NUP1 - nup1p]
GO:0090224	regulation of spindle organization	1.82e-05	0.0013	17.97	4011	9	124	5	[CIK1 - cik1p, CLB2 - clb2p, ESP1 - esp1p, KAR3 - kar3p, CDC28 - cdc28p]
GO:0006360	transcription by RNA polymerase I	1.94e-05	0.00136	4.32	4011	28	431	13	[KIN28 - kin28p, UAF30 - uaf30p, RRN5 - rrn5p, SPT15 - spt15p, RPA49 - rpa49p, RRN6 - rrn6p, RPA43 - rpa43p, RPA14 - rpa14p, SPT5 - spt5p, RRN11 - rrn11p, PAF1 - paf1p, RPA190 - rpa190p, RRN10 - rrn10p]
GO:0051726	regulation of cell cycle	2.11e-05	0.00146	5	4011	229	42	12	[CDC45 - cdc45p, SMC2 - condensin subunit smc2, KIN4 - kin4p, CKS1 - cks1p, CLB2 - clb2p, CDC15 - cdc15p, SPC105 - spc105p, MOB1 - mob1p, DBF2 - dbf2p, KAR3 - kar3p, CDC14 - cdc14p, BUB1 - bub1p]
GO:0050794	regulation of cellular process	2.13e-05	0.00145	1.28	4011	1224	609	237	[SNF6 - snf6p, INO80 - chromatin-remodeling atpase ino80, SHO1 - sho1p, MRC1 - mrc1p, HAP5 - hap5p, YKE2 - yke2p, VTS1 - vts1p, UTP10 - utp10p, SWI4 - swi4p, GZF3 - gzf3p, GLE2 - gle2p, SEC13 - sec13p, NUT1 - nut1p, PDI1 - protein disulfide isomerase pdi1, MED2 - med2p, SDC1 - sdc1p, UBP3 - ubp3p, BIK1 - bik1p, SNF1 - snf1p, SNF4 - snf4p, SPT15 - spt15p, DAD1 - dad1p, UTP15 - utp15p, GLC7 - glc7p…
GO:0007346	regulation of mitotic cell cycle	2.19e-05	0.00147	6.05	4011	143	51	11	[CDC45 - cdc45p, KIN4 - kin4p, CKS1 - cks1p, CLB2 - clb2p, CDC15 - cdc15p, SPC105 - spc105p, MOB1 - mob1p, KAR3 - kar3p, BIM1 - bim1p, CDC14 - cdc14p, BUB1 - bub1p]
GO:0060255	regulation of macromolecule metabolic process	2.38e-05	0.00158	1.35	4011	876	609	179	[CLB1 - clb1p, SMC2 - condensin subunit smc2, FUN12 - fun12p, BUB3 - bub3p, SNF6 - snf6p, SHO1 - sho1p, INO80 - chromatin-remodeling atpase ino80, HAP5 - hap5p, MRC1 - mrc1p, RSC8 - rsc8p, HIR2 - hir2p, YKE2 - yke2p, VTS1 - vts1p, SRB5 - srb5p, SWI4 - swi4p, UTP10 - utp10p, GZF3 - gzf3p, GLE2 - gle2p, SEC13 - sec13p, NUT1 - nut1p, LSM4 - lsm4p, GCD6 - gcd6p, SPT6 - spt6p, STB5 - stb5p, SDC1 - sdc…
GO:0071459	protein localization to chromosome, centromeric region	2.8e-05	0.00184	3.73	4011	16	807	12	[CHL4 - chl4p, MCM21 - mcm21p, CRM1 - crm1p, SCM3 - scm3p, MTW1 - mtw1p, GLC7 - glc7p, CSE4 - cse4p, AME1 - ame1p, SPC105 - spc105p, CTF19 - ctf19p, BUB1 - bub1p, TID3 - tid3p]
GO:0065003	protein-containing complex assembly	3.39e-05	0.00219	1.48	4011	423	703	110	[CIN1 - cin1p, PRP42 - prp42p, FUN12 - fun12p, RTN1 - rtn1p, MTW1 - mtw1p, VOA1 - voa1p, HIR2 - hir2p, VMA21 - vma21p, YKE2 - yke2p, SRB5 - srb5p, SEC13 - sec13p, LSM4 - lsm4p, SPT6 - spt6p, RSA3 - rsa3p, PKR1 - pkr1p, MED2 - med2p, CBF2 - cbf2p, RRP7 - rrp7p, NOG1 - nog1p, SPT15 - spt15p, SMX3 - smx3p, RPL6B - ribosomal 60s subunit protein l6b, RPG1 - rpg1p, SGF29 - sgf29p, PRE4 - proteasome cor…
GO:0000469	cleavage involved in rRNA processing	4.35e-05	0.00278	2.59	4011	60	619	24	[RRP43 - rrp43p, RPS0B - ribosomal 40s subunit protein s0b, DBP8 - atp-dependent rna helicase dbp8, LAS1 - las1p, RRP42 - rrp42p, SKI6 - ski6p, FCF2 - fcf2p, RPS21B - rps21bp, UTP18 - utp18p, MTR3 - mtr3p, RPL37B - ribosomal 60s subunit protein l37b, UTP10 - utp10p, MTR4 - mtr4p, NOP9 - nop9p, BUD21 - bud21p, BUD23 - bud23p, RRP4 - rrp4p, KRI1 - kri1p, UTP6 - utp6p, RPS21A - ribosomal 40s subunit…
GO:0006913	nucleocytoplasmic transport	4.39e-05	0.00277	1.83	4011	145	787	52	[RPS0B - ribosomal 40s subunit protein s0b, NUP2 - nup2p, NMD3 - nmd3p, SRP1 - srp1p, ZUO1 - zuo1p, NMD5 - nmd5p, NUP100 - nup100p, MSN5 - msn5p, NAP1 - nap1p, GLE2 - gle2p, NUG1 - nug1p, THP1 - thp1p, DBP5 - atp-dependent rna helicase dbp5, KAP95 - kap95p, ARX1 - arx1p, SPT6 - spt6p, NUP57 - nup57p, ENP1 - enp1p, RIX7 - putative aaa family atpase rix7, SIS1 - sis1p, NDC1 - ndc1p, NOG1 - nog1p, B…
GO:0051169	nuclear transport	4.39e-05	0.00273	1.83	4011	145	787	52	[RPS0B - ribosomal 40s subunit protein s0b, NUP2 - nup2p, NMD3 - nmd3p, SRP1 - srp1p, ZUO1 - zuo1p, NMD5 - nmd5p, NUP100 - nup100p, MSN5 - msn5p, GLE2 - gle2p, NAP1 - nap1p, NUG1 - nug1p, THP1 - thp1p, DBP5 - atp-dependent rna helicase dbp5, KAP95 - kap95p, ARX1 - arx1p, SPT6 - spt6p, NUP57 - nup57p, ENP1 - enp1p, RIX7 - putative aaa family atpase rix7, SIS1 - sis1p, NDC1 - ndc1p, NOG1 - nog1p, B…
GO:0051649	establishment of localization in cell	4.42e-05	0.00272	1.66	4011	514	343	73	[NUP2 - nup2p, TRS20 - trs20p, NMD3 - nmd3p, SRP1 - srp1p, YET1 - yet1p, SPC1 - spc1p, NMD5 - nmd5p, MSN5 - msn5p, NUG1 - nug1p, THP1 - thp1p, GLE2 - gle2p, SEC13 - sec13p, SNA2 - sna2p, KAP95 - kap95p, ARX1 - arx1p, SNF7 - snf7p, SPT6 - spt6p, ENP1 - enp1p, BIM1 - bim1p, VID24 - glucose-induced degradation complex subunit vid24, SSH1 - ssh1p, APL6 - apl6p, RIX7 - putative aaa family atpase rix7,…
GO:0010557	positive regulation of macromolecule biosynthetic process	4.71e-05	0.00286	1.58	4011	340	618	83	[HAP3 - hap3p, SRB6 - srb6p, TAF1 - taf1p, SNF5 - snf5p, PGD1 - pgd1p, SNF6 - snf6p, INO80 - chromatin-remodeling atpase ino80, HAP5 - hap5p, YKE2 - yke2p, NUP100 - nup100p, SRB5 - srb5p, SWI4 - swi4p, UTP10 - utp10p, SOK2 - sok2p, GZF3 - gzf3p, SEC13 - sec13p, GCN5 - gcn5p, SPT6 - spt6p, FHL1 - fhl1p, PAF1 - paf1p, MED2 - med2p, RIX7 - putative aaa family atpase rix7, SRB4 - srb4p, SKN7 - skn7p,…
GO:0009891	positive regulation of biosynthetic process	4.81e-05	0.00288	1.58	4011	350	618	85	[HAP3 - hap3p, SRB6 - srb6p, TAF1 - taf1p, SNF5 - snf5p, PGD1 - pgd1p, SNF6 - snf6p, INO80 - chromatin-remodeling atpase ino80, HAP5 - hap5p, YKE2 - yke2p, NUP100 - nup100p, SRB5 - srb5p, SWI4 - swi4p, UTP10 - utp10p, SOK2 - sok2p, GZF3 - gzf3p, SEC13 - sec13p, GCN5 - gcn5p, SPT6 - spt6p, FHL1 - fhl1p, PAF1 - paf1p, RIX7 - putative aaa family atpase rix7, MED2 - med2p, SRB4 - srb4p, SKN7 - skn7p,…
GO:0031328	positive regulation of cellular biosynthetic process	4.81e-05	0.00285	1.58	4011	350	618	85	[HAP3 - hap3p, SRB6 - srb6p, TAF1 - taf1p, SNF5 - snf5p, PGD1 - pgd1p, SNF6 - snf6p, INO80 - chromatin-remodeling atpase ino80, HAP5 - hap5p, YKE2 - yke2p, NUP100 - nup100p, SRB5 - srb5p, SWI4 - swi4p, UTP10 - utp10p, SOK2 - sok2p, GZF3 - gzf3p, SEC13 - sec13p, GCN5 - gcn5p, SPT6 - spt6p, FHL1 - fhl1p, PAF1 - paf1p, RIX7 - putative aaa family atpase rix7, MED2 - med2p, SRB4 - srb4p, SKN7 - skn7p,…
GO:0022607	cellular component assembly	5.54e-05	0.00324	1.49	4011	577	489	105	[CIN1 - cin1p, PRP42 - prp42p, SMC2 - condensin subunit smc2, FUN12 - fun12p, SPC97 - spc97p, MTW1 - mtw1p, CDC26 - anaphase promoting complex subunit cdc26, VOA1 - voa1p, HIR2 - hir2p, YKE2 - yke2p, SRB5 - srb5p, SEC13 - sec13p, LSM4 - lsm4p, SPT6 - spt6p, PKR1 - pkr1p, PAN1 - pan1p, CDC14 - cdc14p, MED2 - med2p, CBF2 - cbf2p, SNF1 - snf1p, NOG1 - nog1p, SPT15 - spt15p, SMX3 - smx3p, PRE4 - prot…
GO:0006468	protein phosphorylation	5.63e-05	0.00325	7.01	4011	132	39	9	[KIN4 - kin4p, CLB2 - clb2p, SNF1 - snf1p, CDC15 - cdc15p, MOB1 - mob1p, SNF4 - snf4p, DBF2 - dbf2p, GAL83 - gal83p, BUB1 - bub1p]
GO:0034622	cellular protein-containing complex assembly	5.93e-05	0.00339	1.48	4011	409	703	106	[CIN1 - cin1p, PRP42 - prp42p, FUN12 - fun12p, RTN1 - rtn1p, MTW1 - mtw1p, HIR2 - hir2p, VOA1 - voa1p, VMA21 - vma21p, YKE2 - yke2p, SRB5 - srb5p, SEC13 - sec13p, LSM4 - lsm4p, SPT6 - spt6p, RSA3 - rsa3p, PKR1 - pkr1p, MED2 - med2p, CBF2 - cbf2p, RRP7 - rrp7p, NOG1 - nog1p, SPT15 - spt15p, SMX3 - smx3p, RPL6B - ribosomal 60s subunit protein l6b, RPG1 - rpg1p, SGF29 - sgf29p, PRE4 - proteasome cor…
GO:0019222	regulation of metabolic process	5.99e-05	0.00338	1.32	4011	930	609	186	[CLB1 - clb1p, SMC2 - condensin subunit smc2, FUN12 - fun12p, BUB3 - bub3p, SNF6 - snf6p, SHO1 - sho1p, INO80 - chromatin-remodeling atpase ino80, HAP5 - hap5p, MRC1 - mrc1p, RSC8 - rsc8p, HIR2 - hir2p, YKE2 - yke2p, VTS1 - vts1p, SRB5 - srb5p, SWI4 - swi4p, UTP10 - utp10p, GZF3 - gzf3p, GLE2 - gle2p, SEC13 - sec13p, NUT1 - nut1p, LSM4 - lsm4p, GCD6 - gcd6p, SPT6 - spt6p, STB5 - stb5p, CDC14 - cd…
GO:0006325	chromatin organization	6.03e-05	0.00337	1.71	4011	276	536	63	[NUP2 - nup2p, TAF1 - taf1p, IES3 - ies3p, SNF5 - snf5p, SNF6 - snf6p, MRC1 - mrc1p, RSC8 - rsc8p, UBP10 - ubp10p, CDC26 - anaphase promoting complex subunit cdc26, HIR2 - hir2p, YNG2 - yng2p, RSC58 - rsc58p, HIR1 - hir1p, GCN5 - gcn5p, RNT1 - rnt1p, SPT6 - spt6p, DPB3 - dpb3p, PAF1 - paf1p, SDC1 - sdc1p, PEP5 - pep5p, ARP7 - arp7p, TAF9 - taf9p, SFH1 - sfh1p, DPB2 - dpb2p, HEK2 - hek2p, GLC7 - g…
GO:0050658	RNA transport	6.07e-05	0.00335	2.13	4011	141	493	37	[RPS0B - ribosomal 40s subunit protein s0b, NUP2 - nup2p, NMD3 - nmd3p, YRA2 - yra2p, TIF6 - tif6p, NUP192 - nup192p, SOL1 - sol1p, MYO4 - myosin 4, NUP100 - nup100p, MSN5 - msn5p, MTR4 - mtr4p, GLE2 - gle2p, NUG1 - nug1p, THP1 - thp1p, SEC13 - sec13p, KAP95 - kap95p, ARX1 - arx1p, SPT6 - spt6p, NUP57 - nup57p, ENP1 - enp1p, RIX7 - putative aaa family atpase rix7, SIS1 - sis1p, MEX67 - mex67p, ND…
GO:0051236	establishment of RNA localization	6.07e-05	0.00331	2.13	4011	141	493	37	[RPS0B - ribosomal 40s subunit protein s0b, NUP2 - nup2p, NMD3 - nmd3p, YRA2 - yra2p, TIF6 - tif6p, SOL1 - sol1p, NUP192 - nup192p, MYO4 - myosin 4, NUP100 - nup100p, MSN5 - msn5p, MTR4 - mtr4p, GLE2 - gle2p, NUG1 - nug1p, THP1 - thp1p, SEC13 - sec13p, KAP95 - kap95p, ARX1 - arx1p, SPT6 - spt6p, NUP57 - nup57p, ENP1 - enp1p, RIX7 - putative aaa family atpase rix7, SIS1 - sis1p, MEX67 - mex67p, ND…
GO:0034660	ncRNA metabolic process	6.26e-05	0.00338	1.46	4011	381	785	109	[DBP8 - atp-dependent rna helicase dbp8, LAS1 - las1p, FAF1 - faf1p, HCR1 - hcr1p, FUN12 - fun12p, UTP30 - utp30p, SNF6 - snf6p, PWP1 - pwp1p, UTP10 - utp10p, RPA43 - rpa43p, LSM4 - lsm4p, KRI1 - kri1p, RPS21A - ribosomal 40s subunit protein s21a, RPA190 - rpa190p, RRP7 - rrp7p, NOG1 - nog1p, RPS21B - rps21bp, SPT15 - spt15p, DOM34 - dom34p, CBF5 - pseudouridine synthase cbf5, PRP4 - prp4p, BUD21…
GO:0051656	establishment of organelle localization	6.38e-05	0.00341	3	4011	73	366	20	[RIX7 - putative aaa family atpase rix7, MEX67 - mex67p, NMD3 - nmd3p, CIK1 - cik1p, NIC96 - nic96p, ARC18 - arc18p, BIK1 - bik1p, SNF1 - snf1p, BUD20 - bud20p, TIF6 - tif6p, NUG1 - nug1p, NOP9 - nop9p, BUD23 - bud23p, MTR2 - mtr2p, ARX1 - arx1p, KAR3 - kar3p, DMA1 - ubiquitin-conjugating protein dma1, BIM1 - bim1p, NUP1 - nup1p, SLK19 - slk19p]
GO:0034501	protein localization to kinetochore	6.48e-05	0.00342	25.88	4011	10	62	4	[MTW1 - mtw1p, SPC105 - spc105p, BUB1 - bub1p, TID3 - tid3p]
GO:0000447	endonucleolytic cleavage in ITS1 to separate SSU-rRNA from 5.8S rRNA and LSU-rRNA from tricistronic rRNA transcript (SSU-rRNA, 5.8S rRNA, LSU-rRNA)	7.34e-05	0.00383	3.33	4011	31	582	15	[DBP8 - atp-dependent rna helicase dbp8, RPS0B - ribosomal 40s subunit protein s0b, FCF2 - fcf2p, RPS21B - rps21bp, UTP18 - utp18p, UTP10 - utp10p, NOP9 - nop9p, BUD21 - bud21p, BUD23 - bud23p, KRI1 - kri1p, UTP6 - utp6p, RPS21A - ribosomal 40s subunit protein s21a, ENP1 - enp1p, NOC4 - noc4p, RCL1 - rcl1p]
GO:0015931	nucleobase-containing compound transport	7.38e-05	0.00382	2.56	4011	170	249	27	[NUP2 - nup2p, NMD3 - nmd3p, DID4 - did4p, YRA2 - yra2p, NUP192 - nup192p, TIF6 - tif6p, MYO4 - myosin 4, MSN5 - msn5p, MTR4 - mtr4p, NUG1 - nug1p, GLE2 - gle2p, THP1 - thp1p, VPS20 - vps20p, KAP95 - kap95p, ARX1 - arx1p, SNF7 - snf7p, ENP1 - enp1p, RIX7 - putative aaa family atpase rix7, NDC1 - ndc1p, MEX67 - mex67p, NIC96 - nic96p, BUD23 - bud23p, BRL1 - brl1p, MTR2 - mtr2p, MTR10 - mtr10p, DOA…
GO:0016973	poly(A)+ mRNA export from nucleus	7.43e-05	0.0038	2.81	4011	33	778	18	[RRP43 - rrp43p, NUP2 - nup2p, MEX67 - mex67p, NIC96 - nic96p, YRA2 - yra2p, NUP49 - nup49p, MTR4 - mtr4p, DIS3 - dis3p, GLE2 - gle2p, THP1 - thp1p, DBP5 - atp-dependent rna helicase dbp5, GBP2 - gbp2p, MTR2 - mtr2p, SPT6 - spt6p, ENP1 - enp1p, NUP60 - nup60p, NUP1 - nup1p, NUP133 - nup133p]
GO:0071988	protein localization to spindle pole body	7.65e-05	0.00388	222.83	4011	4	9	2	[KIN4 - kin4p, BBP1 - bbp1p]
GO:1905508	protein localization to microtubule organizing center	7.65e-05	0.00384	222.83	4011	4	9	2	[KIN4 - kin4p, BBP1 - bbp1p]
GO:0065007	biological regulation	7.91e-05	0.00393	1.2	4011	1583	646	307	[CIN1 - cin1p, YMR134W - hypothetical protein, SNF6 - snf6p, INO80 - chromatin-remodeling atpase ino80, SHO1 - sho1p, HAP5 - hap5p, MRC1 - mrc1p, YKE2 - yke2p, VTS1 - vts1p, UTP10 - utp10p, SWI4 - swi4p, GZF3 - gzf3p, GLE2 - gle2p, SEC13 - sec13p, NUT1 - nut1p, LSM4 - lsm4p, PDI1 - protein disulfide isomerase pdi1, MED2 - med2p, SDC1 - sdc1p, UBP3 - ubp3p, COT1 - metal cation transporter cot1, BI…
GO:0046907	intracellular transport	8.18e-05	0.00402	1.62	4011	496	374	75	[NUP2 - nup2p, TRS20 - trs20p, NMD3 - nmd3p, SRP1 - srp1p, YET1 - yet1p, SPC1 - spc1p, NMD5 - nmd5p, MSN5 - msn5p, NUG1 - nug1p, THP1 - thp1p, GLE2 - gle2p, SEC13 - sec13p, SNA2 - sna2p, KAP95 - kap95p, ARX1 - arx1p, SPT6 - spt6p, SNF7 - snf7p, NUP57 - nup57p, ENP1 - enp1p, BIM1 - bim1p, VID24 - glucose-induced degradation complex subunit vid24, SSH1 - ssh1p, SLK19 - slk19p, APL6 - apl6p, RIX7 - …
GO:0050657	nucleic acid transport	8.45e-05	0.00411	2.11	4011	143	493	37	[RPS0B - ribosomal 40s subunit protein s0b, NUP2 - nup2p, NMD3 - nmd3p, YRA2 - yra2p, TIF6 - tif6p, SOL1 - sol1p, NUP192 - nup192p, MYO4 - myosin 4, NUP100 - nup100p, MSN5 - msn5p, MTR4 - mtr4p, GLE2 - gle2p, NUG1 - nug1p, THP1 - thp1p, SEC13 - sec13p, KAP95 - kap95p, ARX1 - arx1p, SPT6 - spt6p, NUP57 - nup57p, ENP1 - enp1p, RIX7 - putative aaa family atpase rix7, SIS1 - sis1p, MEX67 - mex67p, ND…
GO:0051640	organelle localization	8.65e-05	0.00417	2.1	4011	141	501	37	[CIK1 - cik1p, NMD3 - nmd3p, VAM7 - vam7p, TIF6 - tif6p, VPS33 - vps33p, SEC1 - sec1p, NUP100 - nup100p, NUG1 - nug1p, MDM20 - mdm20p, ARX1 - arx1p, ARC15 - arc15p, KAR3 - kar3p, DMA1 - ubiquitin-conjugating protein dma1, BIM1 - bim1p, SLK19 - slk19p, TCB3 - tcb3p, RIX7 - putative aaa family atpase rix7, MEX67 - mex67p, PEP5 - pep5p, NIC96 - nic96p, ARC18 - arc18p, BIK1 - bik1p, SNF1 - snf1p, NOG…
GO:0009059	macromolecule biosynthetic process	9.22e-05	0.0044	1.36	4011	576	785	153	[MNN9 - mnn9p, HCR1 - hcr1p, FUN12 - fun12p, INO80 - chromatin-remodeling atpase ino80, MRC1 - mrc1p, RFA2 - rfa2p, RSC8 - rsc8p, RPL23B - ribosomal 60s subunit protein l23b, HIR2 - hir2p, PSA1 - mannose-1-phosphate guanylyltransferase, DNA2 - dna2p, SRB5 - srb5p, RPL37B - ribosomal 60s subunit protein l37b, RPA43 - rpa43p, NUT1 - nut1p, GCD6 - gcd6p, SPT6 - spt6p, STB5 - stb5p, RPS21A - ribosoma…
GO:0007088	regulation of mitotic nuclear division	9.71e-05	0.00459	9.4	4011	83	36	7	[KIN4 - kin4p, CLB2 - clb2p, CDC15 - cdc15p, SPC105 - spc105p, MOB1 - mob1p, CDC14 - cdc14p, BUB1 - bub1p]
GO:0051225	spindle assembly	9.86e-05	0.00461	14.04	4011	12	119	5	[NDC1 - ndc1p, SPC97 - spc97p, CIN8 - cin8p, BIM1 - bim1p, CDC28 - cdc28p]
GO:0000212	meiotic spindle organization	0.00011	0.00512	182.32	4011	4	11	2	[CDC15 - cdc15p, CDC14 - cdc14p]
GO:0051315	attachment of mitotic spindle microtubules to kinetochore	0.000111	0.00509	21.74	4011	9	82	4	[NUF2 - nuf2p, SPC105 - spc105p, CDC28 - cdc28p, TID3 - tid3p]
GO:0031325	positive regulation of cellular metabolic process	0.000112	0.00511	1.44	4011	459	686	113	[BUB3 - bub3p, SNF6 - snf6p, INO80 - chromatin-remodeling atpase ino80, SHO1 - sho1p, HAP5 - hap5p, YKE2 - yke2p, SRB5 - srb5p, VTS1 - vts1p, UTP10 - utp10p, SWI4 - swi4p, GZF3 - gzf3p, SEC13 - sec13p, SPT6 - spt6p, CDC14 - cdc14p, RIX7 - putative aaa family atpase rix7, MED2 - med2p, SKN7 - skn7p, SNF1 - snf1p, SNF4 - snf4p, LEU3 - leu3p, DOM34 - dom34p, CST6 - cst6p, SGF29 - sgf29p, BCY1 - bcy1…
GO:0009893	positive regulation of metabolic process	0.000142	0.0064	1.43	4011	466	686	114	[BUB3 - bub3p, SNF6 - snf6p, INO80 - chromatin-remodeling atpase ino80, SHO1 - sho1p, HAP5 - hap5p, YKE2 - yke2p, SRB5 - srb5p, VTS1 - vts1p, SWI4 - swi4p, UTP10 - utp10p, GZF3 - gzf3p, SEC13 - sec13p, SPT6 - spt6p, CDC14 - cdc14p, RIX7 - putative aaa family atpase rix7, MED2 - med2p, SKN7 - skn7p, SNF1 - snf1p, SNF4 - snf4p, LEU3 - leu3p, DOM34 - dom34p, CST6 - cst6p, SGF29 - sgf29p, BCY1 - bcy1…
GO:0010604	positive regulation of macromolecule metabolic process	0.00015	0.00671	1.45	4011	437	686	108	[BUB3 - bub3p, SNF6 - snf6p, INO80 - chromatin-remodeling atpase ino80, SHO1 - sho1p, HAP5 - hap5p, YKE2 - yke2p, SRB5 - srb5p, VTS1 - vts1p, SWI4 - swi4p, UTP10 - utp10p, GZF3 - gzf3p, SEC13 - sec13p, SPT6 - spt6p, RIX7 - putative aaa family atpase rix7, MED2 - med2p, SKN7 - skn7p, SNF4 - snf4p, LEU3 - leu3p, DOM34 - dom34p, CST6 - cst6p, SGF29 - sgf29p, BCY1 - bcy1p, UTP15 - utp15p, GLC7 - glc7…
GO:0010628	positive regulation of gene expression	0.000158	0.00698	1.55	4011	335	618	80	[HAP3 - hap3p, SRB6 - srb6p, TAF1 - taf1p, SNF5 - snf5p, PGD1 - pgd1p, SNF6 - snf6p, INO80 - chromatin-remodeling atpase ino80, HAP5 - hap5p, YKE2 - yke2p, NUP100 - nup100p, SRB5 - srb5p, UTP10 - utp10p, SWI4 - swi4p, SOK2 - sok2p, GZF3 - gzf3p, SEC13 - sec13p, GCN5 - gcn5p, SPT6 - spt6p, FHL1 - fhl1p, PAF1 - paf1p, MED2 - med2p, SRB4 - srb4p, SKN7 - skn7p, ARP7 - arp7p, TAF9 - taf9p, RGR1 - rgr1…
GO:0033045	regulation of sister chromatid segregation	0.00016	0.00704	2.82	4011	54	500	19	[DSL1 - dsl1p, BUB3 - bub3p, CDC26 - anaphase promoting complex subunit cdc26, CTF19 - ctf19p, IPL1 - ipl1p, CDC28 - cdc28p, CDC23 - anaphase promoting complex subunit cdc23, BUB1 - bub1p, CEP3 - cep3p, SCC2 - scc2p, KIN4 - kin4p, BIR1 - bir1p, CLB2 - clb2p, TPD3 - tpd3p, GLC7 - glc7p, ESP1 - esp1p, SPC105 - spc105p, BIM1 - bim1p, DMA1 - ubiquitin-conjugating protein dma1]
GO:0051173	positive regulation of nitrogen compound metabolic process	0.000161	0.007	1.44	4011	433	686	107	[BUB3 - bub3p, SNF6 - snf6p, INO80 - chromatin-remodeling atpase ino80, SHO1 - sho1p, HAP5 - hap5p, YKE2 - yke2p, SRB5 - srb5p, VTS1 - vts1p, SWI4 - swi4p, UTP10 - utp10p, GZF3 - gzf3p, SEC13 - sec13p, SPT6 - spt6p, RIX7 - putative aaa family atpase rix7, MED2 - med2p, SKN7 - skn7p, SNF4 - snf4p, LEU3 - leu3p, DOM34 - dom34p, CST6 - cst6p, SGF29 - sgf29p, BCY1 - bcy1p, UTP15 - utp15p, GLC7 - glc7…
GO:0070676	intralumenal vesicle formation	0.000176	0.00759	17.63	4011	7	130	4	[VPS20 - vps20p, DID4 - did4p, SNF7 - snf7p, DOA4 - doa4p]
GO:0006369	termination of RNA polymerase II transcription	0.000202	0.00864	3.64	4011	24	551	12	[REB1 - reb1p, RPB11 - rpb11p, YSH1 - ysh1p, PTI1 - pti1p, PTA1 - pta1p, GLC7 - glc7p, RNT1 - rnt1p, ISW2 - isw2p, REF2 - ref2p, CFT1 - cft1p, SRB5 - srb5p, SUB1 - sub1p]
GO:0043628	ncRNA 3'-end processing	0.000214	0.00906	2.58	4011	38	778	19	[RPS0B - ribosomal 40s subunit protein s0b, RRP43 - rrp43p, RRP42 - rrp42p, MPP6 - mpp6p, SKI6 - ski6p, RPS21B - rps21bp, PAP1 - pap1p, REF2 - ref2p, MTR3 - mtr3p, CBF5 - pseudouridine synthase cbf5, DIS3 - dis3p, MTR4 - mtr4p, YSH1 - ysh1p, PTI1 - pti1p, RRP4 - rrp4p, PAP2 - non-canonical poly(a) polymerase pap2, RNT1 - rnt1p, RPS21A - ribosomal 40s subunit protein s21a, PAF1 - paf1p]
GO:0045184	establishment of protein localization	0.00022	0.00923	1.64	4011	490	330	66	[NUP2 - nup2p, NMD3 - nmd3p, SRP1 - srp1p, RFA2 - rfa2p, YET1 - yet1p, SPC1 - spc1p, NMD5 - nmd5p, MSN5 - msn5p, NUG1 - nug1p, GLE2 - gle2p, SEC13 - sec13p, KAP95 - kap95p, PEX14 - pex14p, ARX1 - arx1p, SNF7 - snf7p, COG4 - cog4p, VID24 - glucose-induced degradation complex subunit vid24, SSH1 - ssh1p, APL6 - apl6p, RIX7 - putative aaa family atpase rix7, NDC1 - ndc1p, VPS53 - vps53p, NEO1 - puta…
GO:0006397	mRNA processing	0.00023	0.00959	2.4	4011	165	274	27	[MPE1 - mpe1p, CFT2 - cft2p, RNA14 - rna14p, KIN28 - kin28p, PAP1 - pap1p, CFT1 - cft1p, PFS2 - pfs2p, CWC22 - cwc22p, PRP5 - dead-box rna helicase prp5, THP1 - thp1p, YSH1 - ysh1p, DCP1 - dcp1p, PTA1 - pta1p, LSM4 - lsm4p, YTH1 - yth1p, SMD1 - smd1p, HSH49 - hsh49p, CDC28 - cdc28p, PRP4 - prp4p, PTI1 - pti1p, SPT5 - spt5p, CDC40 - cdc40p, GLC7 - glc7p, PRP16 - deah-box rna helicase prp16, NTR2 -…
GO:0010556	regulation of macromolecule biosynthetic process	0.000239	0.00988	1.37	4011	655	609	136	[FUN12 - fun12p, SNF6 - snf6p, INO80 - chromatin-remodeling atpase ino80, MRC1 - mrc1p, HAP5 - hap5p, RSC8 - rsc8p, HIR2 - hir2p, YKE2 - yke2p, SRB5 - srb5p, VTS1 - vts1p, UTP10 - utp10p, SWI4 - swi4p, GZF3 - gzf3p, SEC13 - sec13p, NUT1 - nut1p, SPT6 - spt6p, GCD6 - gcd6p, STB5 - stb5p, RIX7 - putative aaa family atpase rix7, MED2 - med2p, SDC1 - sdc1p, SKN7 - skn7p, MET30 - met30p, SNF1 - snf1p,…
GO:0090307	mitotic spindle assembly	0.000243	0.00995	16.85	4011	8	119	4	[NDC1 - ndc1p, SPC97 - spc97p, CIN8 - cin8p, CDC28 - cdc28p]
GO:0051338	regulation of transferase activity	0.000247	0.01	8.19	4011	98	35	7	[RIX7 - putative aaa family atpase rix7, CKS1 - cks1p, CLB2 - clb2p, CDC15 - cdc15p, MOB1 - mob1p, SNF4 - snf4p, GAL83 - gal83p]
GO:0090305	nucleic acid phosphodiester bond hydrolysis	0.000268	0.0108	1.8	4011	163	658	48	[RPS0B - ribosomal 40s subunit protein s0b, POL2 - pol2p, DBP8 - atp-dependent rna helicase dbp8, MPE1 - mpe1p, LAS1 - las1p, CFT2 - cft2p, RRP42 - rrp42p, RNA14 - rna14p, HRP1 - hrp1p, APN2 - dna-(apurinic or apyrimidinic site) lyase apn2, HNT1 - hnt1p, FCF2 - fcf2p, RAD50 - rad50p, CFT1 - cft1p, DNA2 - dna2p, DCP2 - dcp2p, RPL37B - ribosomal 60s subunit protein l37b, PFS2 - pfs2p, MTR3 - mtr3p,…
GO:0051493	regulation of cytoskeleton organization	0.000269	0.0107	2.29	4011	77	592	26	[CAP1 - cap1p, CLB1 - clb1p, CIK1 - cik1p, IPL1 - ipl1p, MDM20 - mdm20p, CLB3 - clb3p, PAN1 - pan1p, ARC15 - arc15p, KAR3 - kar3p, BIM1 - bim1p, DMA1 - ubiquitin-conjugating protein dma1, BIK1 - bik1p, ARC18 - arc18p, DAD4 - dad4p, NET1 - net1p, DAD3 - dad3p, REF2 - ref2p, BBC1 - bbc1p, CDC28 - cdc28p, DAD1 - dad1p, CRN1 - crn1p, CLB2 - clb2p, GLC7 - glc7p, ESP1 - esp1p, SRV2 - srv2p, DAD2 - dad2…
GO:0016071	mRNA metabolic process	0.000278	0.011	2.09	4011	245	259	33	[MPE1 - mpe1p, CFT2 - cft2p, RNA14 - rna14p, PAP1 - pap1p, CFT1 - cft1p, CWC22 - cwc22p, PFS2 - pfs2p, NAM7 - atp-dependent rna helicase nam7, MTR4 - mtr4p, PRP5 - dead-box rna helicase prp5, THP1 - thp1p, DCP1 - dcp1p, YSH1 - ysh1p, LSM4 - lsm4p, PTA1 - pta1p, YTH1 - yth1p, RNT1 - rnt1p, MRT4 - mrt4p, SMD1 - smd1p, RPB7 - rpb7p, HSH49 - hsh49p, SKI6 - ski6p, CDC28 - cdc28p, PRP4 - prp4p, PTI1 - …
GO:0051171	regulation of nitrogen compound metabolic process	0.000283	0.0111	1.32	4011	820	609	164	[CLB1 - clb1p, SMC2 - condensin subunit smc2, FUN12 - fun12p, BUB3 - bub3p, SNF6 - snf6p, SHO1 - sho1p, INO80 - chromatin-remodeling atpase ino80, HAP5 - hap5p, MRC1 - mrc1p, RSC8 - rsc8p, HIR2 - hir2p, YKE2 - yke2p, VTS1 - vts1p, SRB5 - srb5p, SWI4 - swi4p, UTP10 - utp10p, GZF3 - gzf3p, SEC13 - sec13p, NUT1 - nut1p, GCD6 - gcd6p, SPT6 - spt6p, STB5 - stb5p, SDC1 - sdc1p, RIX7 - putative aaa fami…
GO:0060236	regulation of mitotic spindle organization	0.000292	0.0114	16.17	4011	8	124	4	[CIK1 - cik1p, CLB2 - clb2p, ESP1 - esp1p, KAR3 - kar3p]
GO:0031323	regulation of cellular metabolic process	0.000299	0.0116	1.31	4011	863	609	171	[CLB1 - clb1p, SMC2 - condensin subunit smc2, FUN12 - fun12p, BUB3 - bub3p, SNF6 - snf6p, SHO1 - sho1p, INO80 - chromatin-remodeling atpase ino80, HAP5 - hap5p, MRC1 - mrc1p, RSC8 - rsc8p, HIR2 - hir2p, YKE2 - yke2p, VTS1 - vts1p, SRB5 - srb5p, SWI4 - swi4p, UTP10 - utp10p, GZF3 - gzf3p, SEC13 - sec13p, NUT1 - nut1p, GCD6 - gcd6p, SPT6 - spt6p, STB5 - stb5p, CDC14 - cdc14p, VID24 - glucose-induce…
GO:0044380	protein localization to cytoskeleton	0.000305	0.0117	17.79	4011	11	82	4	[KIN4 - kin4p, BIM1 - bim1p, CDC28 - cdc28p, BBP1 - bbp1p]
GO:2000112	regulation of cellular macromolecule biosynthetic process	0.000307	0.0117	1.43	4011	648	462	107	[FUN12 - fun12p, SNF6 - snf6p, HAP5 - hap5p, RSC8 - rsc8p, HIR2 - hir2p, YKE2 - yke2p, SRB5 - srb5p, SWI4 - swi4p, UTP10 - utp10p, SEC13 - sec13p, NUT1 - nut1p, SPT6 - spt6p, GCD6 - gcd6p, STB5 - stb5p, RIX7 - putative aaa family atpase rix7, MED2 - med2p, SDC1 - sdc1p, SKN7 - skn7p, MET30 - met30p, SNF1 - snf1p, SNF4 - snf4p, LEU3 - leu3p, SPT15 - spt15p, CKA1 - cka1p, BCY1 - bcy1p, UTP15 - utp1…
GO:1901362	organic cyclic compound biosynthetic process	0.00032	0.0121	1.52	4011	464	479	84	[TFB5 - tfb5p, TAF1 - taf1p, YMR134W - hypothetical protein, SLC1 - 1-acylglycerol-3-phosphate o-acyltransferase slc1, SUA7 - sua7p, RFA2 - rfa2p, RSC8 - rsc8p, ERG6 - sterol 24-c-methyltransferase, HIR2 - hir2p, SRB5 - srb5p, RRN6 - rrn6p, RSC58 - rsc58p, HIR1 - hir1p, THP1 - thp1p, RET1 - ret1p, RPA43 - rpa43p, NUT1 - nut1p, SPT6 - spt6p, RNT1 - rnt1p, STB5 - stb5p, DPB3 - dpb3p, PAF1 - paf1p, …
GO:1901990	regulation of mitotic cell cycle phase transition	0.000327	0.0123	5.04	4011	97	82	10	[CDC45 - cdc45p, KIN4 - kin4p, CDC15 - cdc15p, SPC105 - spc105p, MOB1 - mob1p, BIM1 - bim1p, CDC14 - cdc14p, CDC28 - cdc28p, BUB1 - bub1p, CDC23 - anaphase promoting complex subunit cdc23]
GO:1901987	regulation of cell cycle phase transition	0.000327	0.0122	5.04	4011	97	82	10	[CDC45 - cdc45p, KIN4 - kin4p, CDC15 - cdc15p, SPC105 - spc105p, MOB1 - mob1p, BIM1 - bim1p, CDC14 - cdc14p, CDC28 - cdc28p, BUB1 - bub1p, CDC23 - anaphase promoting complex subunit cdc23]
GO:0034654	nucleobase-containing compound biosynthetic process	0.00033	0.0122	1.54	4011	364	551	77	[TFB5 - tfb5p, TAF1 - taf1p, SUA7 - sua7p, SLC1 - 1-acylglycerol-3-phosphate o-acyltransferase slc1, RFA2 - rfa2p, RSC8 - rsc8p, HIR2 - hir2p, SRB5 - srb5p, RRN6 - rrn6p, RSC58 - rsc58p, THP1 - thp1p, HIR1 - hir1p, RET1 - ret1p, RPA43 - rpa43p, NUT1 - nut1p, RNT1 - rnt1p, SPT6 - spt6p, DPB3 - dpb3p, STB5 - stb5p, PAF1 - paf1p, RPA190 - rpa190p, PFK1 - 6-phosphofructokinase subunit alpha, RAD52 - …
GO:0006396	RNA processing	0.000344	0.0126	1.52	4011	436	489	81	[DBP8 - atp-dependent rna helicase dbp8, RPS0B - ribosomal 40s subunit protein s0b, MPE1 - mpe1p, LAS1 - las1p, PRP42 - prp42p, IPI1 - ipi1p, FUN12 - fun12p, UTP30 - utp30p, SNF6 - snf6p, FCF2 - fcf2p, PFS2 - pfs2p, CWC22 - cwc22p, UTP10 - utp10p, NUG1 - nug1p, PRP5 - dead-box rna helicase prp5, THP1 - thp1p, LSM4 - lsm4p, YTH1 - yth1p, RNT1 - rnt1p, PAF1 - paf1p, ENP1 - enp1p, HSH49 - hsh49p, NO…
GO:0000478	endonucleolytic cleavage involved in rRNA processing	0.000352	0.0128	2.79	4011	42	582	17	[DBP8 - atp-dependent rna helicase dbp8, RPS0B - ribosomal 40s subunit protein s0b, LAS1 - las1p, FCF2 - fcf2p, RPS21B - rps21bp, UTP18 - utp18p, RPL37B - ribosomal 60s subunit protein l37b, UTP10 - utp10p, NOP9 - nop9p, BUD21 - bud21p, BUD23 - bud23p, KRI1 - kri1p, UTP6 - utp6p, RPS21A - ribosomal 40s subunit protein s21a, ENP1 - enp1p, NOC4 - noc4p, RCL1 - rcl1p]
GO:0000479	endonucleolytic cleavage of tricistronic rRNA transcript (SSU-rRNA, 5.8S rRNA, LSU-rRNA)	0.000352	0.0127	2.79	4011	42	582	17	[RPS0B - ribosomal 40s subunit protein s0b, DBP8 - atp-dependent rna helicase dbp8, LAS1 - las1p, FCF2 - fcf2p, RPS21B - rps21bp, UTP18 - utp18p, RPL37B - ribosomal 60s subunit protein l37b, UTP10 - utp10p, NOP9 - nop9p, BUD21 - bud21p, BUD23 - bud23p, KRI1 - kri1p, UTP6 - utp6p, RPS21A - ribosomal 40s subunit protein s21a, ENP1 - enp1p, NOC4 - noc4p, RCL1 - rcl1p]
GO:0000055	ribosomal large subunit export from nucleus	0.000362	0.013	4.83	4011	23	325	9	[RIX7 - putative aaa family atpase rix7, MEX67 - mex67p, NUG1 - nug1p, NMD3 - nmd3p, NIC96 - nic96p, MTR2 - mtr2p, ARX1 - arx1p, BUD20 - bud20p, NUP1 - nup1p]
GO:0051783	regulation of nuclear division	0.000377	0.0134	7.65	4011	102	36	7	[KIN4 - kin4p, CLB2 - clb2p, CDC15 - cdc15p, SPC105 - spc105p, MOB1 - mob1p, CDC14 - cdc14p, BUB1 - bub1p]
GO:0006997	nucleus organization	0.000429	0.0152	3.11	4011	33	547	14	[SNL1 - snl1p, NDC1 - ndc1p, NIC96 - nic96p, RTN1 - rtn1p, NET1 - net1p, NUP192 - nup192p, NUP49 - nup49p, POM34 - pom34p, GLE2 - gle2p, SEC13 - sec13p, KAP95 - kap95p, YOP1 - yop1p, NUP57 - nup57p, NUP133 - nup133p]
GO:0033047	regulation of mitotic sister chromatid segregation	0.000438	0.0154	2.72	4011	53	500	18	[DSL1 - dsl1p, BUB3 - bub3p, CDC26 - anaphase promoting complex subunit cdc26, CTF19 - ctf19p, IPL1 - ipl1p, CDC23 - anaphase promoting complex subunit cdc23, BUB1 - bub1p, CEP3 - cep3p, SCC2 - scc2p, KIN4 - kin4p, BIR1 - bir1p, CLB2 - clb2p, TPD3 - tpd3p, GLC7 - glc7p, ESP1 - esp1p, SPC105 - spc105p, BIM1 - bim1p, DMA1 - ubiquitin-conjugating protein dma1]
GO:0030847	termination of RNA polymerase II transcription, exosome-dependent	0.000449	0.0156	14.32	4011	8	140	4	[PTI1 - pti1p, PTA1 - pta1p, GLC7 - glc7p, RNT1 - rnt1p]
GO:0051230	spindle disassembly	0.000454	0.0157	121.55	4011	6	11	2	[CDC15 - cdc15p, CDC14 - cdc14p]
GO:1902850	microtubule cytoskeleton organization involved in mitosis	0.000455	0.0156	6.94	4011	34	119	7	[NUF2 - nuf2p, NDC1 - ndc1p, CIK1 - cik1p, SPC97 - spc97p, SNF1 - snf1p, CIN8 - cin8p, CDC28 - cdc28p]
GO:0006999	nuclear pore organization	0.000464	0.0158	3.86	4011	19	547	10	[NDC1 - ndc1p, SNL1 - snl1p, NIC96 - nic96p, RTN1 - rtn1p, KAP95 - kap95p, YOP1 - yop1p, NUP57 - nup57p, NUP192 - nup192p, NUP49 - nup49p, POM34 - pom34p]
GO:0080090	regulation of primary metabolic process	0.000467	0.0158	1.3	4011	851	609	168	[CLB1 - clb1p, SMC2 - condensin subunit smc2, FUN12 - fun12p, BUB3 - bub3p, SNF6 - snf6p, SHO1 - sho1p, INO80 - chromatin-remodeling atpase ino80, HAP5 - hap5p, MRC1 - mrc1p, RSC8 - rsc8p, HIR2 - hir2p, YKE2 - yke2p, VTS1 - vts1p, SRB5 - srb5p, SWI4 - swi4p, UTP10 - utp10p, GZF3 - gzf3p, SEC13 - sec13p, NUT1 - nut1p, GCD6 - gcd6p, SPT6 - spt6p, STB5 - stb5p, VID24 - glucose-induced degradation co…
GO:0071426	ribonucleoprotein complex export from nucleus	0.000472	0.0159	3.7	4011	40	325	12	[RIX7 - putative aaa family atpase rix7, MEX67 - mex67p, NOP9 - nop9p, NUG1 - nug1p, NMD3 - nmd3p, NIC96 - nic96p, BUD23 - bud23p, MTR2 - mtr2p, ARX1 - arx1p, BUD20 - bud20p, TIF6 - tif6p, NUP1 - nup1p]
GO:0071428	rRNA-containing ribonucleoprotein complex export from nucleus	0.000472	0.0158	3.7	4011	40	325	12	[RIX7 - putative aaa family atpase rix7, MEX67 - mex67p, NOP9 - nop9p, NUG1 - nug1p, NMD3 - nmd3p, NIC96 - nic96p, BUD23 - bud23p, MTR2 - mtr2p, ARX1 - arx1p, BUD20 - bud20p, TIF6 - tif6p, NUP1 - nup1p]
GO:0000054	ribosomal subunit export from nucleus	0.000472	0.0157	3.7	4011	40	325	12	[RIX7 - putative aaa family atpase rix7, MEX67 - mex67p, NOP9 - nop9p, NUG1 - nug1p, NMD3 - nmd3p, NIC96 - nic96p, BUD23 - bud23p, MTR2 - mtr2p, ARX1 - arx1p, BUD20 - bud20p, TIF6 - tif6p, NUP1 - nup1p]
GO:0051347	positive regulation of transferase activity	0.00048	0.0158	12.19	4011	47	35	5	[RIX7 - putative aaa family atpase rix7, CKS1 - cks1p, CLB2 - clb2p, CDC15 - cdc15p, SNF4 - snf4p]
GO:0015031	protein transport	0.000499	0.0163	1.36	4011	472	794	127	[NMD3 - nmd3p, NMD5 - nmd5p, VTS1 - vts1p, NAP1 - nap1p, GLE2 - gle2p, DBP5 - atp-dependent rna helicase dbp5, EGD1 - egd1p, SEC13 - sec13p, PEX14 - pex14p, NUP57 - nup57p, GRH1 - grh1p, VID24 - glucose-induced degradation complex subunit vid24, COG5 - cog5p, RIX7 - putative aaa family atpase rix7, SEC21 - sec21p, SIS1 - sis1p, AKR1 - akr1p, NEO1 - putative aminophospholipid-translocating p4-type…
GO:0001188	RNA polymerase I preinitiation complex assembly	0.000539	0.0175	20.33	4011	4	148	3	[RRN11 - rrn11p, SPT15 - spt15p, RRN6 - rrn6p]
GO:0007096	regulation of exit from mitosis	0.000542	0.0175	11.57	4011	34	51	5	[KIN4 - kin4p, CDC15 - cdc15p, MOB1 - mob1p, BIM1 - bim1p, CDC14 - cdc14p]
GO:0031326	regulation of cellular biosynthetic process	0.000561	0.018	1.4	4011	680	462	110	[FUN12 - fun12p, SNF6 - snf6p, HAP5 - hap5p, RSC8 - rsc8p, HIR2 - hir2p, YKE2 - yke2p, SRB5 - srb5p, UTP10 - utp10p, SWI4 - swi4p, SEC13 - sec13p, NUT1 - nut1p, SPT6 - spt6p, GCD6 - gcd6p, STB5 - stb5p, VID24 - glucose-induced degradation complex subunit vid24, RIX7 - putative aaa family atpase rix7, MED2 - med2p, SDC1 - sdc1p, MET30 - met30p, SKN7 - skn7p, SNF1 - snf1p, SNF4 - snf4p, LEU3 - leu3…
GO:0007052	mitotic spindle organization	0.000583	0.0186	8.09	4011	25	119	6	[NUF2 - nuf2p, NDC1 - ndc1p, CIK1 - cik1p, SPC97 - spc97p, CIN8 - cin8p, CDC28 - cdc28p]
GO:0033750	ribosome localization	0.000615	0.0195	3.61	4011	41	325	12	[RIX7 - putative aaa family atpase rix7, MEX67 - mex67p, NOP9 - nop9p, NUG1 - nug1p, NMD3 - nmd3p, NIC96 - nic96p, BUD23 - bud23p, MTR2 - mtr2p, ARX1 - arx1p, BUD20 - bud20p, TIF6 - tif6p, NUP1 - nup1p]
GO:0009889	regulation of biosynthetic process	0.000624	0.0196	1.4	4011	682	462	110	[FUN12 - fun12p, SNF6 - snf6p, HAP5 - hap5p, RSC8 - rsc8p, HIR2 - hir2p, YKE2 - yke2p, SRB5 - srb5p, UTP10 - utp10p, SWI4 - swi4p, SEC13 - sec13p, NUT1 - nut1p, SPT6 - spt6p, GCD6 - gcd6p, STB5 - stb5p, VID24 - glucose-induced degradation complex subunit vid24, RIX7 - putative aaa family atpase rix7, MED2 - med2p, SDC1 - sdc1p, SKN7 - skn7p, MET30 - met30p, SNF1 - snf1p, SNF4 - snf4p, LEU3 - leu3…
GO:0031126	snoRNA 3'-end processing	0.000645	0.0202	2.49	4011	26	993	16	[RRP43 - rrp43p, RRP42 - rrp42p, SKI6 - ski6p, PAP1 - pap1p, REF2 - ref2p, MTR3 - mtr3p, CBF5 - pseudouridine synthase cbf5, DIS3 - dis3p, MTR4 - mtr4p, YSH1 - ysh1p, PTI1 - pti1p, RRP4 - rrp4p, RRP45 - rrp45p, PAP2 - non-canonical poly(a) polymerase pap2, PAF1 - paf1p, NAB3 - nab3p]
GO:0015833	peptide transport	0.000672	0.0209	1.35	4011	475	794	127	[NMD3 - nmd3p, NMD5 - nmd5p, VTS1 - vts1p, NAP1 - nap1p, GLE2 - gle2p, DBP5 - atp-dependent rna helicase dbp5, EGD1 - egd1p, SEC13 - sec13p, PEX14 - pex14p, NUP57 - nup57p, GRH1 - grh1p, VID24 - glucose-induced degradation complex subunit vid24, COG5 - cog5p, RIX7 - putative aaa family atpase rix7, SEC21 - sec21p, SIS1 - sis1p, AKR1 - akr1p, NEO1 - putative aminophospholipid-translocating p4-type…
GO:0006338	chromatin remodeling	0.000733	0.0226	2.03	4011	79	725	29	[RTT102 - rtt102p, BDF1 - bdf1p, SWI3 - swi3p, SNF5 - snf5p, IES3 - ies3p, SNF6 - snf6p, INO80 - chromatin-remodeling atpase ino80, RSC8 - rsc8p, RSC58 - rsc58p, ARP8 - arp8p, GCN5 - gcn5p, IES1 - ies1p, SPT6 - spt6p, ADA2 - ada2p, IES6 - ies6p, SAS2 - sas2p, ARP7 - arp7p, RVB1 - ruvb family atp-dependent dna helicase pontin, IES2 - ies2p, SWI1 - swi1p, ABF1 - abf1p, MRN1 - mrn1p, SFH1 - sfh1p, S…
GO:0070925	organelle assembly	0.000766	0.0235	2.39	4011	80	462	22	[NDC1 - ndc1p, HRR25 - hrr25p, FUN12 - fun12p, CDC10 - septin cdc10, MIF2 - mif2p, SPC97 - spc97p, CBF2 - cbf2p, MTW1 - mtw1p, CDC12 - septin cdc12, CIN8 - cin8p, TIF6 - tif6p, CEP3 - cep3p, CDC28 - cdc28p, DCP2 - dcp2p, EMC6 - emc6p, SCM3 - scm3p, LSM4 - lsm4p, CSE4 - cse4p, THO2 - tho2p, DMA1 - ubiquitin-conjugating protein dma1, BIM1 - bim1p, VPS21 - vps21p]
GO:1990758	mitotic sister chromatid biorientation	0.000826	0.0252	48.91	4011	2	82	2	[SPC105 - spc105p, CDC28 - cdc28p]
GO:0035372	protein localization to microtubule	0.000826	0.025	48.91	4011	2	82	2	[BIM1 - bim1p, CDC28 - cdc28p]
GO:0042886	amide transport	0.000831	0.025	1.34	4011	481	794	128	[NMD3 - nmd3p, NMD5 - nmd5p, VTS1 - vts1p, NAP1 - nap1p, GLE2 - gle2p, DBP5 - atp-dependent rna helicase dbp5, EGD1 - egd1p, SEC13 - sec13p, PEX14 - pex14p, NUP57 - nup57p, GRH1 - grh1p, VID24 - glucose-induced degradation complex subunit vid24, COG5 - cog5p, RIX7 - putative aaa family atpase rix7, SEC21 - sec21p, SIS1 - sis1p, AKR1 - akr1p, NEO1 - putative aminophospholipid-translocating p4-type…
GO:0042254	ribosome biogenesis	0.000838	0.0251	1.7	4011	149	758	48	[RPS0B - ribosomal 40s subunit protein s0b, DBP8 - atp-dependent rna helicase dbp8, FAF1 - faf1p, RPC19 - rpc19p, IPI1 - ipi1p, FAL1 - fal1p, UTP30 - utp30p, FCF2 - fcf2p, TMA23 - tma23p, YDR161W - hypothetical protein, TIF6 - tif6p, RPA49 - rpa49p, GAR1 - gar1p, UTP10 - utp10p, SOF1 - sof1p, NUG1 - nug1p, RPA43 - rpa43p, RPA14 - rpa14p, KRI1 - kri1p, RSA3 - rsa3p, UTP6 - utp6p, UTP21 - utp21p, R…
GO:0060341	regulation of cellular localization	0.000863	0.0257	2.92	4011	48	429	15	[UBP3 - ubp3p, HRR25 - hrr25p, NUP192 - nup192p, CDC28 - cdc28p, SCC2 - scc2p, MSN5 - msn5p, GLE2 - gle2p, SKY1 - sky1p, CET1 - cet1p, GLC7 - glc7p, GLN3 - gln3p, GAL11 - gal11p, SIN4 - sin4p, DBF2 - dbf2p, BRE5 - bre5p]
GO:0030543	2-micrometer plasmid partitioning	0.000882	0.0261	9.36	4011	5	343	4	[SCC2 - scc2p, BIK1 - bik1p, CSE4 - cse4p, BIM1 - bim1p]
GO:0051168	nuclear export	0.000937	0.0276	2.11	4011	108	493	28	[RPS0B - ribosomal 40s subunit protein s0b, NUP2 - nup2p, NMD3 - nmd3p, YRA2 - yra2p, SOL1 - sol1p, TIF6 - tif6p, NUP100 - nup100p, MSN5 - msn5p, MTR4 - mtr4p, GLE2 - gle2p, NUG1 - nug1p, THP1 - thp1p, ARX1 - arx1p, SPT6 - spt6p, ENP1 - enp1p, RIX7 - putative aaa family atpase rix7, MEX67 - mex67p, NIC96 - nic96p, NOG1 - nog1p, BUD20 - bud20p, NUP49 - nup49p, NOP9 - nop9p, CSE1 - cse1p, BUD23 - b…
GO:0043549	regulation of kinase activity	0.000952	0.0278	8.09	4011	85	35	6	[CKS1 - cks1p, CLB2 - clb2p, CDC15 - cdc15p, MOB1 - mob1p, SNF4 - snf4p, GAL83 - gal83p]
GO:0031116	positive regulation of microtubule polymerization	0.000972	0.0283	8.02	4011	10	250	5	[DAD1 - dad1p, DAD4 - dad4p, DAD3 - dad3p, DAD2 - dad2p, BIM1 - bim1p]
GO:0031112	positive regulation of microtubule polymerization or depolymerization	0.000972	0.0281	8.02	4011	10	250	5	[DAD1 - dad1p, DAD4 - dad4p, DAD3 - dad3p, BIM1 - bim1p, DAD2 - dad2p]

## Sheet: Spc72 Component
GO Term	Description	P-value	FDR q-value	Enrichment	N	B	n	b	Genes
GO:0044428	nuclear part	7.89e-37	8.09e-34	2.06	4011	948	501	244	[LAS1 - las1p, YMR134W - hypothetical protein, UTP30 - utp30p, SNF6 - snf6p, MRC1 - mrc1p, HAP5 - hap5p, UTP10 - utp10p, SWI4 - swi4p, GLE2 - gle2p, RPA43 - rpa43p, SEC13 - sec13p, SPC24 - spc24p, NUT1 - nut1p, LSM4 - lsm4p, RPA190 - rpa190p, SDC1 - sdc1p, MED2 - med2p, BIK1 - bik1p, HSH49 - hsh49p, SNF1 - snf1p, SNF4 - snf4p, SPT15 - spt15p, SMX3 - smx3p, DAD1 - dad1p, PRP4 - prp4p, DPB2 - dpb2p…
GO:0032991	protein-containing complex	9.98e-28	5.12e-25	1.45	4011	1755	709	449	[LAS1 - las1p, UTP30 - utp30p, SNF6 - snf6p, INO80 - chromatin-remodeling atpase ino80, MRC1 - mrc1p, SPC24 - spc24p, NUT1 - nut1p, PEX14 - pex14p, RPS21A - ribosomal 40s subunit protein s21a, MED2 - med2p, BIK1 - bik1p, RRP7 - rrp7p, MLC2 - mlc2p, SNF4 - snf4p, SMX3 - smx3p, DAD1 - dad1p, PRP4 - prp4p, MON1 - mon1p, SGF29 - sgf29p, DPB2 - dpb2p, GBP2 - gbp2p, UTP15 - utp15p, RSM23 - mitochondria…
GO:0044446	intracellular organelle part	9.22e-26	3.15e-23	1.39	4011	2298	503	400	[LAS1 - las1p, YMR134W - hypothetical protein, UTP30 - utp30p, SNF6 - snf6p, MRC1 - mrc1p, SPC24 - spc24p, NUT1 - nut1p, PEX14 - pex14p, PDI1 - protein disulfide isomerase pdi1, PKR1 - pkr1p, MED2 - med2p, BIK1 - bik1p, SNF4 - snf4p, SMX3 - smx3p, ERP3 - erp3p, DAD1 - dad1p, PRP4 - prp4p, DPB2 - dpb2p, UTP15 - utp15p, RSM23 - mitochondrial 37s ribosomal protein rsm23, SNT2 - snt2p, PRP16 - deah-b…
GO:0044422	organelle part	2.01e-25	5.14e-23	1.38	4011	2304	503	400	[LAS1 - las1p, YMR134W - hypothetical protein, UTP30 - utp30p, SNF6 - snf6p, MRC1 - mrc1p, SPC24 - spc24p, NUT1 - nut1p, PEX14 - pex14p, PDI1 - protein disulfide isomerase pdi1, PKR1 - pkr1p, MED2 - med2p, BIK1 - bik1p, SNF4 - snf4p, SMX3 - smx3p, ERP3 - erp3p, DAD1 - dad1p, PRP4 - prp4p, DPB2 - dpb2p, UTP15 - utp15p, RSM23 - mitochondrial 37s ribosomal protein rsm23, SNT2 - snt2p, PRP16 - deah-b…
GO:0044798	nuclear transcription factor complex	1.06e-14	2.17e-12	4.38	4011	76	446	37	[HAP3 - hap3p, TFB5 - tfb5p, SRB6 - srb6p, TAF1 - taf1p, TAF10 - taf10p, KIN28 - kin28p, ROX3 - rox3p, UAF30 - uaf30p, HAP5 - hap5p, MED7 - med7p, SRB5 - srb5p, RRN6 - rrn6p, SWI4 - swi4p, CSE2 - cse2p, RRN11 - rrn11p, SIN4 - sin4p, TAF12 - taf12p, MED2 - med2p, SRB4 - srb4p, TAF9 - taf9p, RGR1 - rgr1p, RRN5 - rrn5p, TFG1 - tfg1p, SPT15 - spt15p, TAF7 - taf7p, MED6 - med6p, MBP1 - mbp1p, MED4 - m…
GO:0005816	spindle pole body	1.9e-14	3.25e-12	9.7	4011	62	140	21	[NDC1 - ndc1p, CIK1 - cik1p, SPC97 - spc97p, CBF2 - cbf2p, CDC15 - cdc15p, MOB1 - mob1p, SPC29 - spc29p, CDC28 - cdc28p, BBP1 - bbp1p, NUF2 - nuf2p, KIN4 - kin4p, SPC42 - spc42p, CLB2 - clb2p, GLC7 - glc7p, ESP1 - esp1p, SPC105 - spc105p, DBF2 - dbf2p, KAR3 - kar3p, CDC14 - cdc14p, BIM1 - bim1p, DAD2 - dad2p]
GO:0005815	microtubule organizing center	2.45e-14	3.59e-12	9	4011	70	140	22	[NUP2 - nup2p, NDC1 - ndc1p, CIK1 - cik1p, SPC97 - spc97p, CBF2 - cbf2p, CDC15 - cdc15p, MOB1 - mob1p, SPC29 - spc29p, CDC28 - cdc28p, BBP1 - bbp1p, NUF2 - nuf2p, KIN4 - kin4p, SPC42 - spc42p, CLB2 - clb2p, GLC7 - glc7p, ESP1 - esp1p, SPC105 - spc105p, DBF2 - dbf2p, KAR3 - kar3p, CDC14 - cdc14p, BIM1 - bim1p, DAD2 - dad2p]
GO:0005667	transcription factor complex	8.27e-14	1.06e-11	4.06	4011	82	446	37	[HAP3 - hap3p, TFB5 - tfb5p, SRB6 - srb6p, TAF1 - taf1p, TAF10 - taf10p, KIN28 - kin28p, ROX3 - rox3p, UAF30 - uaf30p, HAP5 - hap5p, MED7 - med7p, SRB5 - srb5p, RRN6 - rrn6p, SWI4 - swi4p, CSE2 - cse2p, RRN11 - rrn11p, SIN4 - sin4p, TAF12 - taf12p, MED2 - med2p, SRB4 - srb4p, TAF9 - taf9p, RGR1 - rgr1p, RRN5 - rrn5p, TFG1 - tfg1p, SPT15 - spt15p, TAF7 - taf7p, MED6 - med6p, MBP1 - mbp1p, MED4 - m…
GO:0044451	nucleoplasm part	1.65e-13	1.88e-11	3.16	4011	202	320	51	[MPE1 - mpe1p, MCM2 - mcm2p, IPI1 - ipi1p, TAF1 - taf1p, PFS2 - pfs2p, GCN5 - gcn5p, NUT1 - nut1p, YTH1 - yth1p, CDC14 - cdc14p, MED2 - med2p, SRB4 - srb4p, TAF9 - taf9p, RGR1 - rgr1p, SPT15 - spt15p, MED6 - med6p, TAF7 - taf7p, MED4 - med4p, PTI1 - pti1p, SPT5 - spt5p, GLC7 - glc7p, GAL11 - gal11p, SNT2 - snt2p, MED1 - med1p, NUT2 - nut2p, SOH1 - soh1p, TAF10 - taf10p, CFT2 - cft2p, RNA14 - rna1…
GO:0005634	nucleus	2.87e-13	2.94e-11	1.53	4011	1789	275	188	[DBP8 - atp-dependent rna helicase dbp8, LAS1 - las1p, NMD3 - nmd3p, SMC2 - condensin subunit smc2, SPC97 - spc97p, MTW1 - mtw1p, RFA2 - rfa2p, RSC8 - rsc8p, CDC23 - anaphase promoting complex subunit cdc23, PFS2 - pfs2p, GLE2 - gle2p, SPC24 - spc24p, NUT1 - nut1p, LSM4 - lsm4p, STB5 - stb5p, RPA190 - rpa190p, CDC14 - cdc14p, RIX7 - putative aaa family atpase rix7, DSN1 - dsn1p, MET30 - met30p, H…
GO:0090575	RNA polymerase II transcription factor complex	4.05e-13	3.77e-11	4.5	4011	62	446	31	[HAP3 - hap3p, TFB5 - tfb5p, SRB6 - srb6p, TAF1 - taf1p, TAF10 - taf10p, KIN28 - kin28p, ROX3 - rox3p, HAP5 - hap5p, SRB5 - srb5p, MED7 - med7p, SWI4 - swi4p, CSE2 - cse2p, SIN4 - sin4p, TAF12 - taf12p, MED2 - med2p, SRB4 - srb4p, TAF9 - taf9p, RGR1 - rgr1p, TFG1 - tfg1p, SPT15 - spt15p, MED6 - med6p, TAF7 - taf7p, MBP1 - mbp1p, MED4 - med4p, SRB7 - srb7p, GAL11 - gal11p, MED1 - med1p, NUT2 - nut…
GO:0044430	cytoskeletal part	1.33e-12	1.14e-10	4.86	4011	198	125	30	[NUP2 - nup2p, IQG1 - iqg1p, CIK1 - cik1p, SPC97 - spc97p, MTW1 - mtw1p, CDC12 - septin cdc12, CIN8 - cin8p, CDC15 - cdc15p, SPC29 - spc29p, BBP1 - bbp1p, NUF2 - nuf2p, SPC105 - spc105p, KAR3 - kar3p, CDC14 - cdc14p, BIM1 - bim1p, DSN1 - dsn1p, NDC1 - ndc1p, ARC18 - arc18p, CBF2 - cbf2p, SNF1 - snf1p, MOB1 - mob1p, DAD3 - dad3p, CDC28 - cdc28p, SPC42 - spc42p, KIN4 - kin4p, CLB2 - clb2p, NSL1 - n…
GO:0000775	chromosome, centromeric region	2.11e-12	1.66e-10	3.87	4011	68	518	34	[HRR25 - hrr25p, DSL1 - dsl1p, MTW1 - mtw1p, HIR2 - hir2p, STU2 - stu2p, IPL1 - ipl1p, TID3 - tid3p, CDC23 - anaphase promoting complex subunit cdc23, NUF2 - nuf2p, YCS4 - ycs4p, HIR1 - hir1p, SPC24 - spc24p, SCM3 - scm3p, GCN5 - gcn5p, SPC105 - spc105p, SLK19 - slk19p, DSN1 - dsn1p, SPC25 - spc25p, MIF2 - mif2p, CBF2 - cbf2p, DAD4 - dad4p, MOB1 - mob1p, CTF19 - ctf19p, DAD3 - dad3p, BUB1 - bub1p…
GO:0070847	core mediator complex	4.71e-12	3.45e-10	7.79	4011	20	412	16	[MED2 - med2p, SRB6 - srb6p, SRB4 - srb4p, ROX3 - rox3p, RGR1 - rgr1p, SRB5 - srb5p, MED7 - med7p, MED6 - med6p, MED4 - med4p, CSE2 - cse2p, SRB7 - srb7p, GAL11 - gal11p, MED1 - med1p, SIN4 - sin4p, NUT2 - nut2p, SOH1 - soh1p]
GO:0044427	chromosomal part	5.44e-12	3.71e-10	1.98	4011	391	528	102	[SMC2 - condensin subunit smc2, SNF6 - snf6p, BUB3 - bub3p, MTW1 - mtw1p, HAP5 - hap5p, MRC1 - mrc1p, RSC8 - rsc8p, RFA2 - rfa2p, HIR2 - hir2p, CDC23 - anaphase promoting complex subunit cdc23, SWI4 - swi4p, UTP10 - utp10p, SPC24 - spc24p, SEC13 - sec13p, SPT6 - spt6p, DSN1 - dsn1p, SDC1 - sdc1p, BIK1 - bik1p, CBF2 - cbf2p, DAD1 - dad1p, DPB2 - dpb2p, BCY1 - bcy1p, UTP15 - utp15p, GLC7 - glc7p, I…
GO:0016592	mediator complex	1.19e-11	7.65e-10	6.74	4011	26	412	18	[MED2 - med2p, SRB6 - srb6p, SRB4 - srb4p, ROX3 - rox3p, RGR1 - rgr1p, SRB5 - srb5p, MED7 - med7p, MED6 - med6p, MED4 - med4p, CSE2 - cse2p, SRB7 - srb7p, NUT1 - nut1p, GAL11 - gal11p, MED1 - med1p, SIN4 - sin4p, NUT2 - nut2p, SOH1 - soh1p, SSN2 - ssn2p]
GO:0000777	condensed chromosome kinetochore	1.87e-11	1.13e-09	4.01	4011	58	518	30	[MTW1 - mtw1p, BUB3 - bub3p, CIN8 - cin8p, STU2 - stu2p, IPL1 - ipl1p, CDC23 - anaphase promoting complex subunit cdc23, TID3 - tid3p, NUF2 - nuf2p, BIR1 - bir1p, SPC24 - spc24p, SPC105 - spc105p, SLK19 - slk19p, DSN1 - dsn1p, SPC25 - spc25p, BIK1 - bik1p, MIF2 - mif2p, CBF2 - cbf2p, DAD4 - dad4p, CTF19 - ctf19p, DAD3 - dad3p, BUB1 - bub1p, CEP3 - cep3p, DAD1 - dad1p, NKP2 - nkp2p, CSE4 - cse4p, …
GO:0005847	mRNA cleavage and polyadenylation specificity factor complex	2.3e-11	1.31e-09	37.14	4011	12	72	8	[MPE1 - mpe1p, CFT2 - cft2p, PTI1 - pti1p, PTA1 - pta1p, YTH1 - yth1p, PAP1 - pap1p, CFT1 - cft1p, PFS2 - pfs2p]
GO:0005849	mRNA cleavage factor complex	1.08e-10	5.81e-09	13.43	4011	15	219	11	[MPE1 - mpe1p, YSH1 - ysh1p, CFT2 - cft2p, RNA14 - rna14p, PTI1 - pti1p, PTA1 - pta1p, YTH1 - yth1p, GLC7 - glc7p, PAP1 - pap1p, CFT1 - cft1p, PFS2 - pfs2p]
GO:0043228	non-membrane-bounded organelle	1.38e-10	7.09e-09	1.42	4011	866	823	252	[LAS1 - las1p, HCR1 - hcr1p, UTP30 - utp30p, SLC1 - 1-acylglycerol-3-phosphate o-acyltransferase slc1, MRC1 - mrc1p, RPL23B - ribosomal 60s subunit protein l23b, LCD1 - lcd1p, VTS1 - vts1p, PWP1 - pwp1p, RPL37B - ribosomal 60s subunit protein l37b, UTP10 - utp10p, RPA43 - rpa43p, SEC13 - sec13p, SPC24 - spc24p, SNA2 - sna2p, LSM4 - lsm4p, RSA3 - rsa3p, ARP2 - actin-related protein 2, RPS21A - rib…
GO:0043232	intracellular non-membrane-bounded organelle	1.38e-10	6.75e-09	1.42	4011	866	823	252	[LAS1 - las1p, HCR1 - hcr1p, UTP30 - utp30p, SLC1 - 1-acylglycerol-3-phosphate o-acyltransferase slc1, MRC1 - mrc1p, RPL23B - ribosomal 60s subunit protein l23b, LCD1 - lcd1p, VTS1 - vts1p, PWP1 - pwp1p, RPL37B - ribosomal 60s subunit protein l37b, UTP10 - utp10p, RPA43 - rpa43p, SEC13 - sec13p, SPC24 - spc24p, SNA2 - sna2p, LSM4 - lsm4p, RSA3 - rsa3p, ARP2 - actin-related protein 2, RPS21A - rib…
GO:0044454	nuclear chromosome part	1.95e-10	9.1e-09	2.28	4011	279	422	67	[MCM2 - mcm2p, SMC2 - condensin subunit smc2, IES3 - ies3p, SNF5 - snf5p, SNF6 - snf6p, MTW1 - mtw1p, RFA2 - rfa2p, RSC8 - rsc8p, HIR2 - hir2p, TID3 - tid3p, NUF2 - nuf2p, SWI4 - swi4p, RSC58 - rsc58p, HIR1 - hir1p, SPC24 - spc24p, DPB3 - dpb3p, FHL1 - fhl1p, SLK19 - slk19p, DSN1 - dsn1p, SPC25 - spc25p, BIK1 - bik1p, ARP7 - arp7p, CBF2 - cbf2p, DAD3 - dad3p, DAD1 - dad1p, SFH1 - sfh1p, DPB2 - dp…
GO:0000776	kinetochore	2.03e-10	9.06e-09	3.64	4011	66	518	31	[MTW1 - mtw1p, BUB3 - bub3p, CIN8 - cin8p, STU2 - stu2p, IPL1 - ipl1p, CDC23 - anaphase promoting complex subunit cdc23, TID3 - tid3p, NUF2 - nuf2p, BIR1 - bir1p, SPC24 - spc24p, SEC13 - sec13p, SPC105 - spc105p, SLK19 - slk19p, DSN1 - dsn1p, SPC25 - spc25p, BIK1 - bik1p, MIF2 - mif2p, CBF2 - cbf2p, DAD4 - dad4p, CTF19 - ctf19p, DAD3 - dad3p, CEP3 - cep3p, BUB1 - bub1p, DAD1 - dad1p, NKP2 - nkp2p…
GO:0098687	chromosomal region	5.63e-10	2.4e-08	2.58	4011	152	521	51	[NUP2 - nup2p, IES3 - ies3p, MTW1 - mtw1p, MRC1 - mrc1p, RFA2 - rfa2p, UBP10 - ubp10p, HIR2 - hir2p, STU2 - stu2p, CDC23 - anaphase promoting complex subunit cdc23, TID3 - tid3p, NUF2 - nuf2p, HIR1 - hir1p, SPC24 - spc24p, GCN5 - gcn5p, SLK19 - slk19p, DSN1 - dsn1p, SDC1 - sdc1p, SPC25 - spc25p, CBF2 - cbf2p, DAD3 - dad3p, DAD1 - dad1p, NKP2 - nkp2p, HEK2 - hek2p, CSE4 - cse4p, ISW2 - isw2p, AME1…
GO:0031262	Ndc80 complex	7.7e-10	3.16e-08	229.2	4011	5	14	4	[NUF2 - nuf2p, SPC25 - spc25p, SPC24 - spc24p, TID3 - tid3p]
GO:0005694	chromosome	1.76e-09	6.93e-08	2.21	4011	127	844	59	[SMC2 - condensin subunit smc2, SNF5 - snf5p, MTW1 - mtw1p, MRC1 - mrc1p, RFA2 - rfa2p, UBP10 - ubp10p, DNA2 - dna2p, STU2 - stu2p, LCD1 - lcd1p, CDC23 - anaphase promoting complex subunit cdc23, TID3 - tid3p, NUF2 - nuf2p, HIR1 - hir1p, SPC24 - spc24p, HTB2 - htb2p, SLK19 - slk19p, DSN1 - dsn1p, RAD52 - recombinase rad52, SPC25 - spc25p, CBF2 - cbf2p, DAD3 - dad3p, DAD1 - dad1p, CBF5 - pseudouri…
GO:0005730	nucleolus	2.67e-09	1.01e-07	1.92	4011	217	780	81	[DBP8 - atp-dependent rna helicase dbp8, LAS1 - las1p, FAF1 - faf1p, UTP30 - utp30p, FCF2 - fcf2p, TMA23 - tma23p, ZUO1 - zuo1p, UBP10 - ubp10p, PWP1 - pwp1p, GAR1 - gar1p, RRN6 - rrn6p, UTP10 - utp10p, NUG1 - nug1p, RPA43 - rpa43p, LSM4 - lsm4p, RRP4 - rrp4p, KRI1 - kri1p, ARX1 - arx1p, RSA3 - rsa3p, RNT1 - rnt1p, FHL1 - fhl1p, RPA190 - rpa190p, NOP10 - nop10p, ENP1 - enp1p, CDC14 - cdc14p, RIX7…
GO:0000780	condensed nuclear chromosome, centromeric region	1.38e-08	5.04e-07	26.66	4011	13	81	7	[NUF2 - nuf2p, SPC25 - spc25p, SPC24 - spc24p, CBF2 - cbf2p, CSE4 - cse4p, TID3 - tid3p, BUB1 - bub1p]
GO:0000779	condensed chromosome, centromeric region	1.85e-08	6.55e-07	18.19	4011	14	126	8	[NUF2 - nuf2p, YCS4 - ycs4p, SPC25 - spc25p, SPC24 - spc24p, CBF2 - cbf2p, CSE4 - cse4p, TID3 - tid3p, BUB1 - bub1p]
GO:0005856	cytoskeleton	6.77e-08	2.31e-06	4.55	4011	148	125	21	[NDC1 - ndc1p, CIK1 - cik1p, ARC18 - arc18p, SPC97 - spc97p, CBF2 - cbf2p, MTW1 - mtw1p, SNF1 - snf1p, CDC12 - septin cdc12, CIN8 - cin8p, CDC15 - cdc15p, MOB1 - mob1p, DAD3 - dad3p, SPC29 - spc29p, BBP1 - bbp1p, SPC42 - spc42p, ESP1 - esp1p, SPC105 - spc105p, DBF2 - dbf2p, KAR3 - kar3p, BIM1 - bim1p, DAD2 - dad2p]
GO:0043231	intracellular membrane-bounded organelle	1.11e-07	3.68e-06	1.17	4011	3129	259	236	[LAS1 - las1p, GLE2 - gle2p, SPC24 - spc24p, NUT1 - nut1p, LSM4 - lsm4p, PEX14 - pex14p, PKR1 - pkr1p, RPA190 - rpa190p, TRS31 - trs31p, HSH49 - hsh49p, SNF1 - snf1p, SNF4 - snf4p, SPT15 - spt15p, ERP3 - erp3p, DAD1 - dad1p, VPS60 - vps60p, PRP4 - prp4p, DPB2 - dpb2p, GLC7 - glc7p, SNT2 - snt2p, PRP16 - deah-box rna helicase prp16, NUT2 - nut2p, SOH1 - soh1p, DAD2 - dad2p, MNP1 - mitochondrial nu…
GO:0000922	spindle pole	1.61e-07	5.17e-06	21.56	4011	21	62	7	[DSN1 - dsn1p, SPC97 - spc97p, MTW1 - mtw1p, NSL1 - nsl1p, CDC15 - cdc15p, KAR3 - kar3p, BIM1 - bim1p]
GO:0043227	membrane-bounded organelle	4.33e-07	1.34e-05	1.16	4011	3188	259	238	[LAS1 - las1p, GLE2 - gle2p, SPC24 - spc24p, NUT1 - nut1p, LSM4 - lsm4p, PEX14 - pex14p, PKR1 - pkr1p, RPA190 - rpa190p, TRS31 - trs31p, HSH49 - hsh49p, SNF1 - snf1p, SNF4 - snf4p, SPT15 - spt15p, ERP3 - erp3p, DAD1 - dad1p, VPS60 - vps60p, PRP4 - prp4p, DPB2 - dpb2p, GLC7 - glc7p, SNT2 - snt2p, VPS35 - vps35p, PRP16 - deah-box rna helicase prp16, NUT2 - nut2p, SOH1 - soh1p, DAD2 - dad2p, MNP1 - …
GO:0000778	condensed nuclear chromosome kinetochore	5.52e-07	1.66e-05	3.98	4011	35	518	18	[SPC25 - spc25p, BIK1 - bik1p, MIF2 - mif2p, CBF2 - cbf2p, BUB3 - bub3p, CIN8 - cin8p, CTF19 - ctf19p, STU2 - stu2p, IPL1 - ipl1p, BUB1 - bub1p, CEP3 - cep3p, TID3 - tid3p, NUF2 - nuf2p, BIR1 - bir1p, SPC24 - spc24p, GLC7 - glc7p, SPC105 - spc105p, SLK19 - slk19p]
GO:0005819	spindle	2e-06	5.87e-05	4.25	4011	36	419	16	[CIK1 - cik1p, CDC10 - septin cdc10, BIK1 - bik1p, CBF2 - cbf2p, DAD4 - dad4p, CIN8 - cin8p, DAD3 - dad3p, IPL1 - ipl1p, DAD1 - dad1p, BIR1 - bir1p, CLB2 - clb2p, ESP1 - esp1p, DAD2 - dad2p, BIM1 - bim1p, CDC14 - cdc14p, SLK19 - slk19p]
GO:0031588	nucleotide-activated protein kinase complex	3.11e-06	8.85e-05	107.44	4011	4	28	3	[SNF1 - snf1p, SNF4 - snf4p, GAL83 - gal83p]
GO:0005641	nuclear envelope lumen	9.54e-06	0.000264	85.95	4011	5	28	3	[SNF1 - snf1p, SNF4 - snf4p, GAL83 - gal83p]
GO:0043226	organelle	1.2e-05	0.000324	1.08	4011	3414	559	512	[LAS1 - las1p, UTP30 - utp30p, YMR134W - hypothetical protein, SNF6 - snf6p, SLC1 - 1-acylglycerol-3-phosphate o-acyltransferase slc1, MRC1 - mrc1p, SPC24 - spc24p, NUT1 - nut1p, PEX14 - pex14p, PDI1 - protein disulfide isomerase pdi1, RPS21A - ribosomal 40s subunit protein s21a, PKR1 - pkr1p, MED2 - med2p, BIK1 - bik1p, AGP1 - agp1p, SNF4 - snf4p, SMX3 - smx3p, ERP3 - erp3p, DAD1 - dad1p, PRP4 -…
GO:0043229	intracellular organelle	1.2e-05	0.000316	1.08	4011	3414	559	512	[LAS1 - las1p, UTP30 - utp30p, YMR134W - hypothetical protein, SNF6 - snf6p, SLC1 - 1-acylglycerol-3-phosphate o-acyltransferase slc1, MRC1 - mrc1p, SPC24 - spc24p, NUT1 - nut1p, PEX14 - pex14p, PDI1 - protein disulfide isomerase pdi1, RPS21A - ribosomal 40s subunit protein s21a, PKR1 - pkr1p, MED2 - med2p, BIK1 - bik1p, AGP1 - agp1p, SNF4 - snf4p, SMX3 - smx3p, ERP3 - erp3p, DAD1 - dad1p, PRP4 -…
GO:0070603	SWI/SNF superfamily-type complex	1.79e-05	0.000459	2.85	4011	51	608	22	[SNF12 - snf12p, BDF1 - bdf1p, SWI3 - swi3p, IES3 - ies3p, SNF5 - snf5p, ARP7 - arp7p, SNF6 - snf6p, RVB1 - ruvb family atp-dependent dna helicase pontin, INO80 - chromatin-remodeling atpase ino80, RSC8 - rsc8p, SWI1 - swi1p, IES2 - ies2p, RSC58 - rsc58p, SWC7 - swc7p, SFH1 - sfh1p, IOC4 - ioc4p, ARP5 - arp5p, IES1 - ies1p, ISW2 - isw2p, DPB3 - dpb3p, IES6 - ies6p, ITC1 - itc1p]
GO:0005789	endoplasmic reticulum membrane	3.54e-05	0.000884	1.61	4011	278	697	78	[MNN9 - mnn9p, SNL1 - snl1p, RTN1 - rtn1p, YPR071W - hypothetical protein, ERV29 - erv29p, YET1 - yet1p, SPC1 - spc1p, IRC22 - irc22p, VOA1 - voa1p, VMA21 - vma21p, FPR2 - peptidylprolyl isomerase family protein fpr2, ORM2 - orm2p, SEC13 - sec13p, NVJ2 - nvj2p, COG4 - cog4p, PKR1 - pkr1p, SSH1 - ssh1p, YNL146W - hypothetical protein, PGA2 - pga2p, YDC1 - alkaline dihydroceramidase, SHR3 - shr3p, …
GO:0000444	MIS12/MIND type complex	4.21e-05	0.00103	320.88	4011	5	5	2	[DSN1 - dsn1p, NSL1 - nsl1p]
GO:0000818	nuclear MIS12/MIND complex	4.21e-05	0.001	320.88	4011	5	5	2	[DSN1 - dsn1p, NSL1 - nsl1p]
GO:0044452	nucleolar part	4.41e-05	0.00103	2.33	4011	63	766	28	[RPC19 - rpc19p, UAF30 - uaf30p, RPA49 - rpa49p, GAR1 - gar1p, RRN6 - rrn6p, UTP10 - utp10p, RPA43 - rpa43p, RPA14 - rpa14p, RRN11 - rrn11p, UTP6 - utp6p, RPA190 - rpa190p, UTP21 - utp21p, NOP10 - nop10p, CDC14 - cdc14p, YTM1 - ytm1p, RRN7 - rrn7p, RRP7 - rrp7p, NET1 - net1p, UTP4 - utp4p, RRN5 - rrn5p, UTP18 - utp18p, CKA1 - cka1p, CBF5 - pseudouridine synthase cbf5, RPA34 - rpa34p, UTP15 - utp1…
GO:0044432	endoplasmic reticulum part	7.32e-05	0.00167	1.55	4011	311	697	84	[MNN9 - mnn9p, SNL1 - snl1p, RTN1 - rtn1p, YPR071W - hypothetical protein, ERV29 - erv29p, YET1 - yet1p, SPC1 - spc1p, IRC22 - irc22p, VOA1 - voa1p, VMA21 - vma21p, FPR2 - peptidylprolyl isomerase family protein fpr2, ORM2 - orm2p, SEC13 - sec13p, NVJ2 - nvj2p, PDI1 - protein disulfide isomerase pdi1, COG4 - cog4p, PKR1 - pkr1p, SSH1 - ssh1p, YNL146W - hypothetical protein, PGA2 - pga2p, YDC1 - a…
GO:0000939	condensed chromosome inner kinetochore	7.83e-05	0.00175	111.42	4011	2	36	2	[DSN1 - dsn1p, SPC105 - spc105p]
GO:0000941	condensed nuclear chromosome inner kinetochore	7.83e-05	0.00171	111.42	4011	2	36	2	[DSN1 - dsn1p, SPC105 - spc105p]
GO:0005662	DNA replication factor A complex	0.000109	0.00234	34.18	4011	4	88	3	[RFA3 - rfa3p, RFA1 - rfa1p, RFA2 - rfa2p]
GO:0061695	transferase complex, transferring phosphorus-containing groups	0.000122	0.00255	2.38	4011	92	494	27	[POL2 - pol2p, TFB5 - tfb5p, POB3 - pob3p, KIN28 - kin28p, RPA49 - rpa49p, PRS4 - ribose phosphate diphosphokinase subunit prs4, RET1 - ret1p, RPA43 - rpa43p, RPA14 - rpa14p, CLB3 - clb3p, DPB3 - dpb3p, RPA190 - rpa190p, RPC53 - rpc53p, PFK1 - 6-phosphofructokinase subunit alpha, RPB7 - rpb7p, RPC37 - rpc37p, RPB11 - rpb11p, SNF1 - snf1p, RPO31 - rpo31p, SNF4 - snf4p, GAL83 - gal83p, CDC28 - cdc2…
GO:0005823	central plaque of spindle pole body	0.000134	0.00274	42.67	4011	6	47	3	[SPC42 - spc42p, SPC29 - spc29p, BBP1 - bbp1p]
GO:1904949	ATPase complex	0.000156	0.00314	2.49	4011	61	608	23	[SNF12 - snf12p, BDF1 - bdf1p, SWI3 - swi3p, IES3 - ies3p, SNF5 - snf5p, ARP7 - arp7p, SNF6 - snf6p, RVB1 - ruvb family atp-dependent dna helicase pontin, INO80 - chromatin-remodeling atpase ino80, RSC8 - rsc8p, RFC5 - replication factor c subunit 5, SWI1 - swi1p, IES2 - ies2p, RSC58 - rsc58p, SWC7 - swc7p, SFH1 - sfh1p, ARP5 - arp5p, IOC4 - ioc4p, IES1 - ies1p, ISW2 - isw2p, DPB3 - dpb3p, IES6 -…
GO:1902911	protein kinase complex	0.000166	0.00328	15.08	4011	38	35	5	[CLB2 - clb2p, CKS1 - cks1p, SNF1 - snf1p, SNF4 - snf4p, GAL83 - gal83p]
GO:0044450	microtubule organizing center part	0.000271	0.00525	20.08	4011	17	47	4	[SPC42 - spc42p, SPC97 - spc97p, SPC29 - spc29p, BBP1 - bbp1p]
GO:0005783	endoplasmic reticulum	0.000275	0.00522	1.47	4011	464	572	97	[MNN9 - mnn9p, SNL1 - snl1p, RTN1 - rtn1p, YMR134W - hypothetical protein, SLC1 - 1-acylglycerol-3-phosphate o-acyltransferase slc1, SHO1 - sho1p, VOA1 - voa1p, FPR2 - peptidylprolyl isomerase family protein fpr2, SEC13 - sec13p, PDI1 - protein disulfide isomerase pdi1, YIP3 - yip3p, PKR1 - pkr1p, SEC21 - sec21p, TRS31 - trs31p, YDC1 - alkaline dihydroceramidase, YDR476C - hypothetical protein, U…
GO:0000120	RNA polymerase I transcription factor complex	0.000298	0.00556	15.49	4011	7	148	4	[RRN11 - rrn11p, RRN5 - rrn5p, RRN10 - rrn10p, RRN6 - rrn6p]
GO:0005874	microtubule	0.0003	0.0055	4.92	4011	54	151	10	[NUF2 - nuf2p, CIK1 - cik1p, SPC97 - spc97p, DAD4 - dad4p, CIN8 - cin8p, DAD3 - dad3p, KAR3 - kar3p, DAD2 - dad2p, BIM1 - bim1p, CDC28 - cdc28p]
GO:0055029	nuclear DNA-directed RNA polymerase complex	0.000333	0.00598	3.32	4011	29	541	13	[RPC37 - rpc37p, RPB7 - rpb7p, RPC19 - rpc19p, RPB11 - rpb11p, POB3 - pob3p, RPO31 - rpo31p, RPA49 - rpa49p, RET1 - ret1p, RPA43 - rpa43p, RPA14 - rpa14p, RPC17 - rpc17p, RPA190 - rpa190p, RPC53 - rpc53p]
GO:0051233	spindle midzone	0.000458	0.0081	6.38	4011	9	419	6	[BIR1 - bir1p, CBF2 - cbf2p, DAD2 - dad2p, BIM1 - bim1p, IPL1 - ipl1p, SLK19 - slk19p]
GO:1902494	catalytic complex	0.000516	0.00897	1.33	4011	545	797	144	[MNN9 - mnn9p, CLB1 - clb1p, SNF6 - snf6p, INO80 - chromatin-remodeling atpase ino80, RSC8 - rsc8p, CDC26 - anaphase promoting complex subunit cdc26, CDC23 - anaphase promoting complex subunit cdc23, RPA43 - rpa43p, RPA190 - rpa190p, SAS2 - sas2p, SDC1 - sdc1p, MET30 - met30p, SNF1 - snf1p, SNF4 - snf4p, HMG2 - hydroxymethylglutaryl-coa reductase (nadph) hmg2, RFC5 - replication factor c subunit …
GO:0000428	DNA-directed RNA polymerase complex	0.000558	0.00953	3.21	4011	30	541	13	[RPC37 - rpc37p, RPB7 - rpb7p, RPC19 - rpc19p, RPB11 - rpb11p, POB3 - pob3p, RPO31 - rpo31p, RPA49 - rpa49p, RPA14 - rpa14p, RPA43 - rpa43p, RET1 - ret1p, RPC17 - rpc17p, RPA190 - rpa190p, RPC53 - rpc53p]
GO:0030880	RNA polymerase complex	0.000558	0.00937	3.21	4011	30	541	13	[RPC37 - rpc37p, RPB7 - rpb7p, RPC19 - rpc19p, RPB11 - rpb11p, POB3 - pob3p, RPO31 - rpo31p, RPA49 - rpa49p, RET1 - ret1p, RPA43 - rpa43p, RPA14 - rpa14p, RPC17 - rpc17p, RPA190 - rpa190p, RPC53 - rpc53p]
GO:0005813	centrosome	0.000599	0.00991	10.11	4011	16	124	5	[NUP2 - nup2p, SPC97 - spc97p, CLB2 - clb2p, ESP1 - esp1p, CDC14 - cdc14p]
GO:0072686	mitotic spindle	0.000702	0.0114	9.49	4011	14	151	5	[DAD4 - dad4p, ESP1 - esp1p, DAD3 - dad3p, DAD2 - dad2p, CDC14 - cdc14p]
GO:0005881	cytoplasmic microtubule	0.00074	0.0119	10.05	4011	19	105	5	[CIK1 - cik1p, CIN8 - cin8p, KAR3 - kar3p, BIM1 - bim1p, CDC28 - cdc28p]

## Sheet: Spc42 Process
GO Term	Description	P-value	FDR q-value	Enrichment	N	B	n	b	Genes
GO:0008610	lipid biosynthetic process	1.43e-22	6.99e-19	5.84	4095	142	227	46	[PHS1 - phs1p, CAX4 - cax4p, GPI17 - gpi17p, YMR134W - hypothetical protein, OPI3 - opi3p, SLC1 - 1-acylglycerol-3-phosphate o-acyltransferase slc1, SUR2 - sphingosine hydroxylase, SAC1 - phosphatidylinositol-3-phosphatase sac1, GPT2 - bifunctional glycerol-3-phosphate/glycerone-phosphate o-acyltransferase gpt2, GPI14 - gpi14p, ERG11 - sterol 14-demethylase, PBN1 - pbn1p, ERG4 - delta(24(24(1)))-…
GO:0006629	lipid metabolic process	2.37e-16	5.78e-13	2.68	4095	237	523	81	[PHS1 - phs1p, YMR134W - hypothetical protein, SLC1 - 1-acylglycerol-3-phosphate o-acyltransferase slc1, ERG6 - sterol 24-c-methyltransferase, GPT2 - bifunctional glycerol-3-phosphate/glycerone-phosphate o-acyltransferase gpt2, GPI14 - gpi14p, ERG4 - delta(24(24(1)))-sterol reductase, FAA4 - long-chain fatty acid-coa ligase faa4, PBN1 - pbn1p, ERG5 - c-22 sterol desaturase, CMD1 - cmd1p, NUS1 - n…
GO:0044255	cellular lipid metabolic process	1.15e-15	1.86e-12	5.22	4095	220	132	37	[PHS1 - phs1p, GPI17 - gpi17p, YMR134W - hypothetical protein, OPI3 - opi3p, SUR2 - sphingosine hydroxylase, DPL1 - sphinganine-1-phosphate aldolase dpl1, SAC1 - phosphatidylinositol-3-phosphatase sac1, GPT2 - bifunctional glycerol-3-phosphate/glycerone-phosphate o-acyltransferase gpt2, GPI14 - gpi14p, ERG4 - delta(24(24(1)))-sterol reductase, PBN1 - pbn1p, ELO1 - elo1p, ORM2 - orm2p, KAP95 - kap…
GO:0006643	membrane lipid metabolic process	2.35e-14	2.86e-11	6.2	4095	57	313	27	[PHS1 - phs1p, ORM1 - orm1p, GPI17 - gpi17p, SUR2 - sphingosine hydroxylase, DPL1 - sphinganine-1-phosphate aldolase dpl1, GPI14 - gpi14p, PBN1 - pbn1p, GUP1 - gup1p, ELO1 - elo1p, ORM2 - orm2p, GPI8 - gpi8p, MCD4 - mcd4p, LAC1 - sphingosine n-acyltransferase lac1, GAA1 - gaa1p, CSG2 - mannosylinositol phosphorylceramide synthase regulatory subunit, FEN1 - fatty acid elongase fen1, LAS21 - las21p…
GO:0046467	membrane lipid biosynthetic process	4.56e-14	4.45e-11	7	4095	43	313	23	[CSG2 - mannosylinositol phosphorylceramide synthase regulatory subunit, PHS1 - phs1p, FEN1 - fatty acid elongase fen1, LAS21 - las21p, LCB1 - serine c-palmitoyltransferase lcb1, YDC1 - alkaline dihydroceramidase, SUR4 - fatty acid elongase sur4, GPI17 - gpi17p, LAG1 - sphingosine n-acyltransferase lag1, PER1 - per1p, SUR2 - sphingosine hydroxylase, PGA1 - pga1p, IFA38 - ketoreductase, GPI14 - gp…
GO:0006810	transport	4.15e-11	3.37e-08	1.7	4095	968	333	134	[PHS1 - phs1p, NMD3 - nmd3p, GNP1 - gnp1p, SEC27 - sec27p, SEC65 - sec65p, STI1 - sti1p, PHO88 - pho88p, GLE2 - gle2p, YGR125W - hypothetical protein, ZIM17 - zim17p, YIP3 - yip3p, PHO86 - pho86p, COS8 - cos8p, PAN1 - pan1p, NUP57 - nup57p, NUP157 - nup157p, SIS1 - sis1p, BRO1 - bro1p, FAA1 - long-chain fatty acid-coa ligase faa1, NEO1 - putative aminophospholipid-translocating p4-type atpase neo…
GO:0051179	localization	5.81e-11	4.04e-08	1.53	4095	1116	440	184	[PHS1 - phs1p, NMD3 - nmd3p, GNP1 - gnp1p, SEC27 - sec27p, SEC65 - sec65p, STI1 - sti1p, RFA2 - rfa2p, MYO4 - myosin 4, NMD5 - nmd5p, PHO88 - pho88p, GLE2 - gle2p, VMA4 - vma4p, YGR125W - hypothetical protein, ZIM17 - zim17p, YIP3 - yip3p, COS8 - cos8p, PHO86 - pho86p, PAN1 - pan1p, NUP57 - nup57p, NUP157 - nup157p, SSA4 - hsp70 family chaperone ssa4, SIS1 - sis1p, BRO1 - bro1p, FAA1 - long-chain…
GO:0008104	protein localization	1.72e-10	1.05e-07	1.79	4095	581	461	117	[NMD3 - nmd3p, SEC27 - sec27p, SEC65 - sec65p, STI1 - sti1p, RFA2 - rfa2p, NMD5 - nmd5p, PHO88 - pho88p, GLE2 - gle2p, CMD1 - cmd1p, ZIM17 - zim17p, COS8 - cos8p, NUP57 - nup57p, NUP157 - nup157p, SSA4 - hsp70 family chaperone ssa4, SIS1 - sis1p, BRO1 - bro1p, SEC39 - sec39p, NEO1 - putative aminophospholipid-translocating p4-type atpase neo1, UFE1 - ufe1p, HSP104 - chaperone atpase hsp104, SEC62…
GO:0051234	establishment of localization	2.62e-10	1.42e-07	1.58	4095	995	420	161	[PHS1 - phs1p, NMD3 - nmd3p, GNP1 - gnp1p, SEC27 - sec27p, SEC65 - sec65p, STI1 - sti1p, RFA2 - rfa2p, NMD5 - nmd5p, MYO4 - myosin 4, PHO88 - pho88p, GLE2 - gle2p, VMA4 - vma4p, YGR125W - hypothetical protein, ZIM17 - zim17p, YIP3 - yip3p, PHO86 - pho86p, COS8 - cos8p, PAN1 - pan1p, NUP57 - nup57p, NUP157 - nup157p, SSA4 - hsp70 family chaperone ssa4, SIS1 - sis1p, BRO1 - bro1p, FAA1 - long-chain…
GO:0045184	establishment of protein localization	2.75e-10	1.34e-07	1.86	4095	496	461	104	[NMD3 - nmd3p, SEC27 - sec27p, SEC65 - sec65p, STI1 - sti1p, RFA2 - rfa2p, NMD5 - nmd5p, PHO88 - pho88p, GLE2 - gle2p, CMD1 - cmd1p, ZIM17 - zim17p, COS8 - cos8p, NUP57 - nup57p, NUP157 - nup157p, SSA4 - hsp70 family chaperone ssa4, SIS1 - sis1p, BRO1 - bro1p, SEC39 - sec39p, NEO1 - putative aminophospholipid-translocating p4-type atpase neo1, UFE1 - ufe1p, SEC62 - sec62p, SEC10 - sec10p, MYO2 - …
GO:0015031	protein transport	3.94e-10	1.74e-07	1.87	4095	479	461	101	[NMD3 - nmd3p, SEC27 - sec27p, SEC65 - sec65p, STI1 - sti1p, NMD5 - nmd5p, PHO88 - pho88p, GLE2 - gle2p, CMD1 - cmd1p, ZIM17 - zim17p, COS8 - cos8p, NUP57 - nup57p, NUP157 - nup157p, SSA4 - hsp70 family chaperone ssa4, SIS1 - sis1p, BRO1 - bro1p, SEC39 - sec39p, NEO1 - putative aminophospholipid-translocating p4-type atpase neo1, UFE1 - ufe1p, SEC62 - sec62p, SEC10 - sec10p, MYO2 - myosin 2, SEC1…
GO:0033036	macromolecule localization	4.01e-10	1.63e-07	1.77	4095	602	445	116	[NMD3 - nmd3p, SEC27 - sec27p, SEC65 - sec65p, STI1 - sti1p, RFA2 - rfa2p, MYO4 - myosin 4, NMD5 - nmd5p, PHO88 - pho88p, GLE2 - gle2p, ZIM17 - zim17p, COS8 - cos8p, NUP57 - nup57p, NUP157 - nup157p, SSA4 - hsp70 family chaperone ssa4, SIS1 - sis1p, BRO1 - bro1p, SEC39 - sec39p, NEO1 - putative aminophospholipid-translocating p4-type atpase neo1, UFE1 - ufe1p, SEC62 - sec62p, HSP104 - chaperone a…
GO:0015833	peptide transport	5.86e-10	2.2e-07	1.86	4095	482	461	101	[NMD3 - nmd3p, SEC27 - sec27p, SEC65 - sec65p, STI1 - sti1p, NMD5 - nmd5p, PHO88 - pho88p, GLE2 - gle2p, CMD1 - cmd1p, ZIM17 - zim17p, COS8 - cos8p, NUP57 - nup57p, NUP157 - nup157p, SSA4 - hsp70 family chaperone ssa4, SIS1 - sis1p, BRO1 - bro1p, SEC39 - sec39p, NEO1 - putative aminophospholipid-translocating p4-type atpase neo1, UFE1 - ufe1p, SEC62 - sec62p, SEC10 - sec10p, MYO2 - myosin 2, SEC1…
GO:0071705	nitrogen compound transport	8.26e-10	2.87e-07	1.9	4095	623	321	93	[YPT7 - ypt7p, NMD3 - nmd3p, SEC27 - sec27p, GNP1 - gnp1p, SEC65 - sec65p, STI1 - sti1p, BSD2 - bsd2p, SRP1 - srp1p, YET1 - yet1p, SPC1 - spc1p, PHO88 - pho88p, MSN5 - msn5p, NUG1 - nug1p, GLE2 - gle2p, ZIM17 - zim17p, KAP95 - kap95p, COS8 - cos8p, NUP57 - nup57p, NUP157 - nup157p, TNA1 - tna1p, SSH1 - ssh1p, GSP2 - gsp2p, SIS1 - sis1p, NDC1 - ndc1p, BRO1 - bro1p, FAA1 - long-chain fatty acid-coa…
GO:0042886	amide transport	1.16e-09	3.77e-07	2.03	4095	488	331	80	[YPT7 - ypt7p, NMD3 - nmd3p, SEC27 - sec27p, SEC65 - sec65p, STI1 - sti1p, BSD2 - bsd2p, SRP1 - srp1p, YET1 - yet1p, SPC1 - spc1p, PHO88 - pho88p, MSN5 - msn5p, NUG1 - nug1p, GLE2 - gle2p, ZIM17 - zim17p, KAP95 - kap95p, COS8 - cos8p, NUP57 - nup57p, NUP157 - nup157p, SSH1 - ssh1p, GSP2 - gsp2p, SIS1 - sis1p, NDC1 - ndc1p, BRO1 - bro1p, PGA2 - pga2p, NEO1 - putative aminophospholipid-translocatin…
GO:0046474	glycerophospholipid biosynthetic process	1.24e-09	3.78e-07	6.37	4095	51	227	18	[LAS21 - las21p, GPI17 - gpi17p, OPI3 - opi3p, PER1 - per1p, SLC1 - 1-acylglycerol-3-phosphate o-acyltransferase slc1, SAC1 - phosphatidylinositol-3-phosphatase sac1, GPT2 - bifunctional glycerol-3-phosphate/glycerone-phosphate o-acyltransferase gpt2, PGA1 - pga1p, GPI14 - gpi14p, PBN1 - pbn1p, GPI11 - gpi11p, GUP1 - gup1p, CPT1 - diacylglycerol cholinephosphotransferase, GPI8 - gpi8p, ALE1 - ale…
GO:0030148	sphingolipid biosynthetic process	1.39e-09	4e-07	15.51	4095	20	132	10	[LCB2 - serine c-palmitoyltransferase lcb2, ELO1 - elo1p, PHS1 - phs1p, FEN1 - fatty acid elongase fen1, LCB1 - serine c-palmitoyltransferase lcb1, SUR4 - fatty acid elongase sur4, LAG1 - sphingosine n-acyltransferase lag1, SUR2 - sphingosine hydroxylase, LAC1 - sphingosine n-acyltransferase lac1, IFA38 - ketoreductase]
GO:0045017	glycerolipid biosynthetic process	1.69e-09	4.56e-07	3.4	4095	53	659	29	[GPI17 - gpi17p, OPI3 - opi3p, SLC1 - 1-acylglycerol-3-phosphate o-acyltransferase slc1, SAC1 - phosphatidylinositol-3-phosphatase sac1, SCT1 - bifunctional glycerol-3-phosphate/glycerone-phosphate o-acyltransferase sct1, GPT2 - bifunctional glycerol-3-phosphate/glycerone-phosphate o-acyltransferase gpt2, GPI14 - gpi14p, PBN1 - pbn1p, GUP1 - gup1p, CMD1 - cmd1p, GPI8 - gpi8p, KAP95 - kap95p, EPT1…
GO:0042761	very long-chain fatty acid biosynthetic process	1.93e-09	4.96e-07	33.02	4095	6	124	6	[ELO1 - elo1p, PHS1 - phs1p, FEN1 - fatty acid elongase fen1, SUR4 - fatty acid elongase sur4, TSC13 - trans-2-enoyl-coa reductase (nadph) tsc13, IFA38 - ketoreductase]
GO:0051641	cellular localization	2.23e-09	5.44e-07	1.54	4095	698	631	166	[NMD3 - nmd3p, SEC27 - sec27p, SEC65 - sec65p, STI1 - sti1p, MYO4 - myosin 4, NMD5 - nmd5p, PHO88 - pho88p, KAP123 - kap123p, CMD1 - cmd1p, GLE2 - gle2p, ZIM17 - zim17p, SNA2 - sna2p, YIP3 - yip3p, ARP2 - actin-related protein 2, COS8 - cos8p, PHO86 - pho86p, RPS19B - ribosomal 40s subunit protein s19b, NUP57 - nup57p, NUP157 - nup157p, VID24 - glucose-induced degradation complex subunit vid24, S…
GO:0006665	sphingolipid metabolic process	2.4e-09	5.56e-07	11.28	4095	33	132	12	[LCB2 - serine c-palmitoyltransferase lcb2, ELO1 - elo1p, PHS1 - phs1p, FEN1 - fatty acid elongase fen1, LCB1 - serine c-palmitoyltransferase lcb1, ORM2 - orm2p, SUR4 - fatty acid elongase sur4, LAG1 - sphingosine n-acyltransferase lag1, SUR2 - sphingosine hydroxylase, DPL1 - sphinganine-1-phosphate aldolase dpl1, IFA38 - ketoreductase, LAC1 - sphingosine n-acyltransferase lac1]
GO:0006886	intracellular protein transport	2.81e-09	6.23e-07	2.45	4095	279	317	53	[YPT7 - ypt7p, NMD3 - nmd3p, SEC27 - sec27p, SEC65 - sec65p, STI1 - sti1p, BSD2 - bsd2p, SRP1 - srp1p, YET1 - yet1p, SPC1 - spc1p, PHO88 - pho88p, NUG1 - nug1p, ZIM17 - zim17p, KAP95 - kap95p, COS8 - cos8p, SSH1 - ssh1p, GSP2 - gsp2p, SIS1 - sis1p, BRO1 - bro1p, SEC72 - sec72p, SEC62 - sec62p, SEC11 - sec11p, ERP3 - erp3p, TIM18 - tim18p, VPS28 - vps28p, ERV25 - erv25p, CSE1 - cse1p, CRM1 - crm1p…
GO:0071702	organic substance transport	3.18e-09	6.75e-07	1.83	4095	677	321	97	[NMD3 - nmd3p, GNP1 - gnp1p, SEC27 - sec27p, SEC65 - sec65p, STI1 - sti1p, PHO88 - pho88p, GLE2 - gle2p, ZIM17 - zim17p, COS8 - cos8p, NUP57 - nup57p, NUP157 - nup157p, SIS1 - sis1p, BRO1 - bro1p, FAA1 - long-chain fatty acid-coa ligase faa1, NEO1 - putative aminophospholipid-translocating p4-type atpase neo1, UFE1 - ufe1p, AGP1 - agp1p, SEC62 - sec62p, SEC10 - sec10p, SEC11 - sec11p, POM33 - pom…
GO:0070972	protein localization to endoplasmic reticulum	1.15e-08	2.34e-06	7.11	4095	28	288	14	[SEC65 - sec65p, YET1 - yet1p, SPC1 - spc1p, SGT2 - sgt2p, SEC63 - sec63p, SEC11 - sec11p, SRP72 - srp72p, PHO88 - pho88p, YDJ1 - ydj1p, SPC2 - spc2p, YET3 - yet3p, MDY2 - mdy2p, GET3 - guanine nucleotide exchange factor get3, SSH1 - ssh1p]
GO:0000038	very long-chain fatty acid metabolic process	1.55e-08	3.02e-06	62.23	4095	7	47	5	[PHS1 - phs1p, ELO1 - elo1p, FEN1 - fatty acid elongase fen1, SUR4 - fatty acid elongase sur4, TSC13 - trans-2-enoyl-coa reductase (nadph) tsc13]
GO:0008654	phospholipid biosynthetic process	1.64e-08	3.08e-06	3.07	4095	77	554	32	[OPI10 - opi10p, GPI17 - gpi17p, OPI3 - opi3p, SLC1 - 1-acylglycerol-3-phosphate o-acyltransferase slc1, SAC1 - phosphatidylinositol-3-phosphatase sac1, GPT2 - bifunctional glycerol-3-phosphate/glycerone-phosphate o-acyltransferase gpt2, GPI14 - gpi14p, PBN1 - pbn1p, GUP1 - gup1p, CMD1 - cmd1p, GPI8 - gpi8p, KAP95 - kap95p, EPT1 - bifunctional diacylglycerol cholinephosphotransferase/ethanolamine…
GO:0016126	sterol biosynthetic process	5.4e-08	9.74e-06	8.61	4095	33	173	12	[ERG11 - sterol 14-demethylase, ERG4 - delta(24(24(1)))-sterol reductase, ERG5 - c-22 sterol desaturase, YMR134W - hypothetical protein, HMG1 - hydroxymethylglutaryl-coa reductase (nadph) hmg1, ERG1 - squalene monooxygenase, ERG3 - c-5 sterol desaturase, NSG1 - nsg1p, HMG2 - hydroxymethylglutaryl-coa reductase (nadph) hmg2, NSG2 - nsg2p, ERG25 - methylsterol monooxygenase, NCP1 - ncp1p]
GO:0030497	fatty acid elongation	6.24e-08	1.09e-05	33.02	4095	5	124	5	[ELO1 - elo1p, PHS1 - phs1p, FEN1 - fatty acid elongase fen1, SUR4 - fatty acid elongase sur4, IFA38 - ketoreductase]
GO:0006661	phosphatidylinositol biosynthetic process	7.37e-08	1.24e-05	4.66	4095	30	498	17	[LAS21 - las21p, GPI13 - gpi13p, GPI17 - gpi17p, PER1 - per1p, SAC1 - phosphatidylinositol-3-phosphatase sac1, TED1 - ted1p, PGA1 - pga1p, GPI14 - gpi14p, PBN1 - pbn1p, GPI11 - gpi11p, GUP1 - gup1p, CMD1 - cmd1p, GPI8 - gpi8p, GWT1 - gwt1p, PIS1 - cdp-diacylglycerol--inositol 3-phosphatidyltransferase, MCD4 - mcd4p, GAA1 - gaa1p]
GO:0006506	GPI anchor biosynthetic process	7.44e-08	1.21e-05	5.48	4095	21	498	14	[LAS21 - las21p, GPI13 - gpi13p, GPI17 - gpi17p, PER1 - per1p, TED1 - ted1p, PGA1 - pga1p, GPI14 - gpi14p, PBN1 - pbn1p, GPI11 - gpi11p, GUP1 - gup1p, GPI8 - gpi8p, GWT1 - gwt1p, MCD4 - mcd4p, GAA1 - gaa1p]
GO:0006696	ergosterol biosynthetic process	7.73e-08	1.21e-05	10.87	4095	24	157	10	[ERG4 - delta(24(24(1)))-sterol reductase, ERG11 - sterol 14-demethylase, ERG5 - c-22 sterol desaturase, YMR134W - hypothetical protein, HMG1 - hydroxymethylglutaryl-coa reductase (nadph) hmg1, ERG1 - squalene monooxygenase, ERG3 - c-5 sterol desaturase, ERG25 - methylsterol monooxygenase, HMG2 - hydroxymethylglutaryl-coa reductase (nadph) hmg2, NCP1 - ncp1p]
GO:0016129	phytosteroid biosynthetic process	7.73e-08	1.18e-05	10.87	4095	24	157	10	[ERG4 - delta(24(24(1)))-sterol reductase, ERG11 - sterol 14-demethylase, ERG5 - c-22 sterol desaturase, YMR134W - hypothetical protein, HMG1 - hydroxymethylglutaryl-coa reductase (nadph) hmg1, ERG1 - squalene monooxygenase, ERG3 - c-5 sterol desaturase, ERG25 - methylsterol monooxygenase, HMG2 - hydroxymethylglutaryl-coa reductase (nadph) hmg2, NCP1 - ncp1p]
GO:0044108	cellular alcohol biosynthetic process	7.73e-08	1.14e-05	10.87	4095	24	157	10	[ERG4 - delta(24(24(1)))-sterol reductase, ERG11 - sterol 14-demethylase, ERG5 - c-22 sterol desaturase, YMR134W - hypothetical protein, HMG1 - hydroxymethylglutaryl-coa reductase (nadph) hmg1, ERG1 - squalene monooxygenase, ERG3 - c-5 sterol desaturase, ERG25 - methylsterol monooxygenase, HMG2 - hydroxymethylglutaryl-coa reductase (nadph) hmg2, NCP1 - ncp1p]
GO:0097384	cellular lipid biosynthetic process	7.73e-08	1.11e-05	10.87	4095	24	157	10	[ERG4 - delta(24(24(1)))-sterol reductase, ERG11 - sterol 14-demethylase, ERG5 - c-22 sterol desaturase, YMR134W - hypothetical protein, HMG1 - hydroxymethylglutaryl-coa reductase (nadph) hmg1, ERG1 - squalene monooxygenase, ERG3 - c-5 sterol desaturase, ERG25 - methylsterol monooxygenase, HMG2 - hydroxymethylglutaryl-coa reductase (nadph) hmg2, NCP1 - ncp1p]
GO:0006694	steroid biosynthetic process	7.83e-08	1.09e-05	8.35	4095	34	173	12	[ERG11 - sterol 14-demethylase, ERG4 - delta(24(24(1)))-sterol reductase, ERG5 - c-22 sterol desaturase, YMR134W - hypothetical protein, HMG1 - hydroxymethylglutaryl-coa reductase (nadph) hmg1, ERG1 - squalene monooxygenase, ERG3 - c-5 sterol desaturase, NSG1 - nsg1p, HMG2 - hydroxymethylglutaryl-coa reductase (nadph) hmg2, NSG2 - nsg2p, ERG25 - methylsterol monooxygenase, NCP1 - ncp1p]
GO:0046907	intracellular transport	7.88e-08	1.07e-05	1.92	4095	487	329	75	[YPT7 - ypt7p, NMD3 - nmd3p, SEC27 - sec27p, SEC65 - sec65p, STI1 - sti1p, BSD2 - bsd2p, SRP1 - srp1p, ERV29 - erv29p, YET1 - yet1p, SPC1 - spc1p, PHO88 - pho88p, MSN5 - msn5p, NUG1 - nug1p, GLE2 - gle2p, ZIM17 - zim17p, KAP95 - kap95p, YIP3 - yip3p, COS8 - cos8p, PHO86 - pho86p, SSH1 - ssh1p, RER2 - rer2p, SIS1 - sis1p, GSP2 - gsp2p, BRO1 - bro1p, HRI1 - hri1p, SHR3 - shr3p, UFE1 - ufe1p, SEC62 …
GO:0051649	establishment of localization in cell	8.85e-08	1.16e-05	1.64	4095	505	563	114	[NMD3 - nmd3p, SEC27 - sec27p, SEC65 - sec65p, STI1 - sti1p, NMD5 - nmd5p, PHO88 - pho88p, GLE2 - gle2p, ZIM17 - zim17p, YIP3 - yip3p, COS8 - cos8p, ARP2 - actin-related protein 2, PHO86 - pho86p, RPS19B - ribosomal 40s subunit protein s19b, SSA4 - hsp70 family chaperone ssa4, VID24 - glucose-induced degradation complex subunit vid24, SIS1 - sis1p, SEC21 - sec21p, BRO1 - bro1p, BIK1 - bik1p, UFE1…
GO:0051170	nuclear import	1.15e-07	1.48e-05	3.04	4095	51	714	27	[SRP1 - srp1p, NMD5 - nmd5p, KAP122 - kap122p, KAP120 - kap120p, NSP1 - nsp1p, KAP123 - kap123p, GLE2 - gle2p, CMD1 - cmd1p, YRB2 - yrb2p, KAP95 - kap95p, RTG2 - rtg2p, NUP57 - nup57p, NUP157 - nup157p, ACC1 - acetyl-coa carboxylase acc1, SIS1 - sis1p, GSP2 - gsp2p, NIC96 - nic96p, SXM1 - sxm1p, NUP49 - nup49p, POM34 - pom34p, YDJ1 - ydj1p, CSE1 - cse1p, WTM1 - wtm1p, MTR2 - mtr2p, MTR10 - mtr10p…
GO:1902653	secondary alcohol biosynthetic process	1.22e-07	1.52e-05	10.43	4095	25	157	10	[ERG11 - sterol 14-demethylase, ERG4 - delta(24(24(1)))-sterol reductase, ERG5 - c-22 sterol desaturase, YMR134W - hypothetical protein, HMG1 - hydroxymethylglutaryl-coa reductase (nadph) hmg1, ERG1 - squalene monooxygenase, ERG3 - c-5 sterol desaturase, HMG2 - hydroxymethylglutaryl-coa reductase (nadph) hmg2, ERG25 - methylsterol monooxygenase, NCP1 - ncp1p]
GO:0072599	establishment of protein localization to endoplasmic reticulum	1.68e-07	2.04e-05	4.48	4095	25	585	16	[CUE1 - cue1p, SEC65 - sec65p, SPC1 - spc1p, SGT2 - sgt2p, SEC63 - sec63p, SEC11 - sec11p, SRP72 - srp72p, PHO88 - pho88p, YDJ1 - ydj1p, SEC53 - phosphomannomutase sec53, SRP14 - srp14p, SPC2 - spc2p, SRP102 - srp102p, MDY2 - mdy2p, GET3 - guanine nucleotide exchange factor get3, SSH1 - ssh1p]
GO:0045047	protein targeting to ER	1.79e-07	2.12e-05	7.11	4095	24	288	12	[PHO88 - pho88p, YDJ1 - ydj1p, SEC65 - sec65p, SPC2 - spc2p, SGT2 - sgt2p, SEC63 - sec63p, SEC11 - sec11p, SPC1 - spc1p, MDY2 - mdy2p, GET3 - guanine nucleotide exchange factor get3, SSH1 - ssh1p, SRP72 - srp72p]
GO:1901617	organic hydroxy compound biosynthetic process	2.88e-07	3.34e-05	3.27	4095	60	522	25	[YMR134W - hypothetical protein, ERG6 - sterol 24-c-methyltransferase, PDC1 - indolepyruvate decarboxylase 1, ERG4 - delta(24(24(1)))-sterol reductase, ERG11 - sterol 14-demethylase, ERG5 - c-22 sterol desaturase, ERG27 - 3-keto-steroid reductase, NUS1 - nus1p, ERG1 - squalene monooxygenase, VIP1 - inositol polyphosphate kinase vip1, ERG25 - methylsterol monooxygenase, ERG26 - sterol-4-alpha-carb…
GO:0006888	ER to Golgi vesicle-mediated transport	3.1e-07	3.51e-05	5.88	4095	72	145	15	[SHR3 - shr3p, UFE1 - ufe1p, SLY1 - sly1p, YET1 - yet1p, ERD2 - erd2p, SEC24 - sec24p, ERP3 - erp3p, ERV25 - erv25p, ERV14 - erv14p, ERP4 - erp4p, YIP3 - yip3p, YET3 - yet3p, PHO86 - pho86p, ERP2 - erp2p, RER2 - rer2p]
GO:0008204	ergosterol metabolic process	3.14e-07	3.47e-05	9.66	4095	27	157	10	[ERG11 - sterol 14-demethylase, ERG4 - delta(24(24(1)))-sterol reductase, ERG5 - c-22 sterol desaturase, YMR134W - hypothetical protein, HMG1 - hydroxymethylglutaryl-coa reductase (nadph) hmg1, ERG1 - squalene monooxygenase, ERG3 - c-5 sterol desaturase, HMG2 - hydroxymethylglutaryl-coa reductase (nadph) hmg2, ERG25 - methylsterol monooxygenase, NCP1 - ncp1p]
GO:0016128	phytosteroid metabolic process	3.14e-07	3.4e-05	9.66	4095	27	157	10	[ERG4 - delta(24(24(1)))-sterol reductase, ERG11 - sterol 14-demethylase, ERG5 - c-22 sterol desaturase, YMR134W - hypothetical protein, HMG1 - hydroxymethylglutaryl-coa reductase (nadph) hmg1, ERG1 - squalene monooxygenase, ERG3 - c-5 sterol desaturase, HMG2 - hydroxymethylglutaryl-coa reductase (nadph) hmg2, ERG25 - methylsterol monooxygenase, NCP1 - ncp1p]
GO:0006999	nuclear pore organization	3.7e-07	3.92e-05	8.71	4095	20	235	10	[PER33 - per33p, NDC1 - ndc1p, SNL1 - snl1p, NIC96 - nic96p, KAP95 - kap95p, YOP1 - yop1p, NUP57 - nup57p, NUP192 - nup192p, NUP157 - nup157p, POM33 - pom33p]
GO:0009247	glycolipid biosynthetic process	3.92e-07	4.06e-05	4.74	4095	26	498	15	[CSG2 - mannosylinositol phosphorylceramide synthase regulatory subunit, LAS21 - las21p, GPI13 - gpi13p, GPI17 - gpi17p, PER1 - per1p, TED1 - ted1p, PGA1 - pga1p, GPI14 - gpi14p, PBN1 - pbn1p, GPI11 - gpi11p, GUP1 - gup1p, GPI8 - gpi8p, GWT1 - gwt1p, MCD4 - mcd4p, GAA1 - gaa1p]
GO:0006505	GPI anchor metabolic process	4.12e-07	4.19e-05	5.01	4095	23	498	14	[LAS21 - las21p, GPI13 - gpi13p, GPI17 - gpi17p, PER1 - per1p, TED1 - ted1p, PGA1 - pga1p, GPI14 - gpi14p, PBN1 - pbn1p, GPI11 - gpi11p, GUP1 - gup1p, GPI8 - gpi8p, GWT1 - gwt1p, MCD4 - mcd4p, GAA1 - gaa1p]
GO:0034613	cellular protein localization	4.21e-07	4.19e-05	2.39	4095	343	215	43	[YPT7 - ypt7p, COS1 - cos1p, CDC12 - septin cdc12, SRP1 - srp1p, GET1 - get1p, YET1 - yet1p, SPC1 - spc1p, BBP1 - bbp1p, NSP1 - nsp1p, PHO88 - pho88p, SEC14 - sec14p, GLE2 - gle2p, GPI8 - gpi8p, ZIM17 - zim17p, SEC6 - sec6p, SPC2 - spc2p, KAP95 - kap95p, NUP57 - nup57p, GSF2 - gsf2p, GET3 - guanine nucleotide exchange factor get3, SSH1 - ssh1p, GSP2 - gsp2p, BRO1 - bro1p, NIC96 - nic96p, SEC11 - …
GO:1902652	secondary alcohol metabolic process	4.52e-07	4.4e-05	9.32	4095	28	157	10	[ERG4 - delta(24(24(1)))-sterol reductase, ERG11 - sterol 14-demethylase, ERG5 - c-22 sterol desaturase, YMR134W - hypothetical protein, HMG1 - hydroxymethylglutaryl-coa reductase (nadph) hmg1, ERG1 - squalene monooxygenase, ERG3 - c-5 sterol desaturase, HMG2 - hydroxymethylglutaryl-coa reductase (nadph) hmg2, ERG25 - methylsterol monooxygenase, NCP1 - ncp1p]
GO:0006650	glycerophospholipid metabolic process	5.26e-07	5.02e-05	4.34	4095	79	227	19	[LAS21 - las21p, GPI17 - gpi17p, OPI3 - opi3p, PER1 - per1p, SLC1 - 1-acylglycerol-3-phosphate o-acyltransferase slc1, SAC1 - phosphatidylinositol-3-phosphatase sac1, GPT2 - bifunctional glycerol-3-phosphate/glycerone-phosphate o-acyltransferase gpt2, PGA1 - pga1p, GPI14 - gpi14p, PBN1 - pbn1p, GPI11 - gpi11p, SEC14 - sec14p, GUP1 - gup1p, CPT1 - diacylglycerol cholinephosphotransferase, GPI8 - g…
GO:0006606	protein import into nucleus	5.98e-07	5.6e-05	2.99	4095	48	714	25	[SRP1 - srp1p, NMD5 - nmd5p, KAP122 - kap122p, KAP120 - kap120p, NSP1 - nsp1p, KAP123 - kap123p, CMD1 - cmd1p, GLE2 - gle2p, YRB2 - yrb2p, KAP95 - kap95p, RTG2 - rtg2p, NUP57 - nup57p, NUP157 - nup157p, ACC1 - acetyl-coa carboxylase acc1, GSP2 - gsp2p, NIC96 - nic96p, SXM1 - sxm1p, NUP49 - nup49p, POM34 - pom34p, CSE1 - cse1p, WTM1 - wtm1p, MTR2 - mtr2p, MTR10 - mtr10p, NUP133 - nup133p, NUP1 - n…
GO:0070727	cellular macromolecule localization	7.08e-07	6.51e-05	1.68	4095	364	631	94	[YPT7 - ypt7p, HSP82 - hsp90 family chaperone hsp82, CUE1 - cue1p, SAM35 - sam35p, TPM2 - tpm2p, SEC65 - sec65p, STI1 - sti1p, BSD2 - bsd2p, SRP1 - srp1p, GET1 - get1p, YET1 - yet1p, SPC1 - spc1p, KAP122 - kap122p, NMD5 - nmd5p, MYO4 - myosin 4, TID3 - tid3p, BBP1 - bbp1p, PHO88 - pho88p, KAP123 - kap123p, CMD1 - cmd1p, GLE2 - gle2p, GPI8 - gpi8p, ZIM17 - zim17p, KAP95 - kap95p, ARP2 - actin-rela…
GO:0006633	fatty acid biosynthetic process	8.21e-07	7.4e-05	24.89	4095	21	47	6	[ELO1 - elo1p, PHS1 - phs1p, FEN1 - fatty acid elongase fen1, OLE1 - stearoyl-coa 9-desaturase, SUR4 - fatty acid elongase sur4, TSC13 - trans-2-enoyl-coa reductase (nadph) tsc13]
GO:0044281	small molecule metabolic process	8.72e-07	7.73e-05	1.38	4095	580	989	193	[PHS1 - phs1p, YMR134W - hypothetical protein, ARO2 - bifunctional chorismate synthase/riboflavin reductase [nad(p)h] aro2, SIS2 - phosphopantothenoylcysteine decarboxylase complex subunit sis2, PSA1 - mannose-1-phosphate guanylyltransferase, SAM2 - methionine adenosyltransferase sam2, ALA1 - alanine--trna ligase, ADE17 - bifunctional phosphoribosylaminoimidazolecarboxamide formyltransferase/imp …
GO:0090407	organophosphate biosynthetic process	9.02e-07	7.85e-05	1.9	4095	185	709	61	[DUT1 - bifunctional ditp/dutp diphosphatase, URA5 - orotate phosphoribosyltransferase ura5, SLC1 - 1-acylglycerol-3-phosphate o-acyltransferase slc1, YNK1 - nucleoside diphosphate kinase, NMA1 - nicotinamide-nucleotide adenylyltransferase nma1, SIS2 - phosphopantothenoylcysteine decarboxylase complex subunit sis2, GPT2 - bifunctional glycerol-3-phosphate/glycerone-phosphate o-acyltransferase gpt…
GO:0051292	nuclear pore complex assembly	9.29e-07	7.94e-05	4.85	4095	10	844	10	[PER33 - per33p, NIC96 - nic96p, YGR026W - hypothetical protein, RTN1 - rtn1p, KAP95 - kap95p, YOP1 - yop1p, NUP170 - nup170p, POM33 - pom33p, NUP157 - nup157p, DYN2 - dynein light chain]
GO:0046931	pore complex assembly	9.29e-07	7.81e-05	4.85	4095	10	844	10	[PER33 - per33p, YGR026W - hypothetical protein, NIC96 - nic96p, RTN1 - rtn1p, KAP95 - kap95p, YOP1 - yop1p, NUP170 - nup170p, NUP157 - nup157p, POM33 - pom33p, DYN2 - dynein light chain]
GO:0044107	cellular alcohol metabolic process	9.54e-07	7.88e-05	8.69	4095	30	157	10	[ERG11 - sterol 14-demethylase, ERG4 - delta(24(24(1)))-sterol reductase, ERG5 - c-22 sterol desaturase, YMR134W - hypothetical protein, HMG1 - hydroxymethylglutaryl-coa reductase (nadph) hmg1, ERG1 - squalene monooxygenase, ERG3 - c-5 sterol desaturase, HMG2 - hydroxymethylglutaryl-coa reductase (nadph) hmg2, ERG25 - methylsterol monooxygenase, NCP1 - ncp1p]
GO:0034625	fatty acid elongation, monounsaturated fatty acid	9.79e-07	7.95e-05	113.75	4095	3	36	3	[ELO1 - elo1p, FEN1 - fatty acid elongase fen1, SUR4 - fatty acid elongase sur4]
GO:0034626	fatty acid elongation, polyunsaturated fatty acid	9.79e-07	7.82e-05	113.75	4095	3	36	3	[ELO1 - elo1p, FEN1 - fatty acid elongase fen1, SUR4 - fatty acid elongase sur4]
GO:0019367	fatty acid elongation, saturated fatty acid	9.79e-07	7.69e-05	113.75	4095	3	36	3	[ELO1 - elo1p, FEN1 - fatty acid elongase fen1, SUR4 - fatty acid elongase sur4]
GO:0019368	fatty acid elongation, unsaturated fatty acid	9.79e-07	7.57e-05	113.75	4095	3	36	3	[ELO1 - elo1p, FEN1 - fatty acid elongase fen1, SUR4 - fatty acid elongase sur4]
GO:0034504	protein localization to nucleus	1.45e-06	0.00011	2.77	4095	56	714	27	[SRP1 - srp1p, NMD5 - nmd5p, KAP122 - kap122p, KAP120 - kap120p, NSP1 - nsp1p, KAP123 - kap123p, GLE2 - gle2p, CMD1 - cmd1p, YRB2 - yrb2p, KAP95 - kap95p, RTG2 - rtg2p, NUP57 - nup57p, NUP157 - nup157p, ACC1 - acetyl-coa carboxylase acc1, GSP2 - gsp2p, NIC96 - nic96p, SXM1 - sxm1p, NUP49 - nup49p, POM34 - pom34p, CDC28 - cdc28p, CSE1 - cse1p, WTM1 - wtm1p, MTR10 - mtr10p, MTR2 - mtr2p, ICE2 - ice…
GO:0006997	nucleus organization	1.45e-06	0.000109	6.34	4095	33	235	12	[PER33 - per33p, GSP2 - gsp2p, NDC1 - ndc1p, SNL1 - snl1p, GLE2 - gle2p, NIC96 - nic96p, KAP95 - kap95p, YOP1 - yop1p, NUP57 - nup57p, NUP192 - nup192p, POM33 - pom33p, NUP157 - nup157p]
GO:0046165	alcohol biosynthetic process	1.46e-06	0.000108	3.56	4095	46	500	20	[ARO10 - phenylpyruvate decarboxylase aro10, YMR134W - hypothetical protein, HMG1 - hydroxymethylglutaryl-coa reductase (nadph) hmg1, BDH1 - (r,r)-butanediol dehydrogenase, ERG6 - sterol 24-c-methyltransferase, HMG2 - hydroxymethylglutaryl-coa reductase (nadph) hmg2, PDC1 - indolepyruvate decarboxylase 1, ERG4 - delta(24(24(1)))-sterol reductase, ERG11 - sterol 14-demethylase, ERG5 - c-22 sterol …
GO:0016125	sterol metabolic process	1.5e-06	0.000109	6.61	4095	43	173	12	[ERG4 - delta(24(24(1)))-sterol reductase, ERG11 - sterol 14-demethylase, ERG5 - c-22 sterol desaturase, YMR134W - hypothetical protein, HMG1 - hydroxymethylglutaryl-coa reductase (nadph) hmg1, ERG1 - squalene monooxygenase, ERG3 - c-5 sterol desaturase, NSG1 - nsg1p, HMG2 - hydroxymethylglutaryl-coa reductase (nadph) hmg2, NSG2 - nsg2p, ERG25 - methylsterol monooxygenase, NCP1 - ncp1p]
GO:0006664	glycolipid metabolic process	1.51e-06	0.000108	4.41	4095	28	498	15	[CSG2 - mannosylinositol phosphorylceramide synthase regulatory subunit, LAS21 - las21p, GPI13 - gpi13p, GPI17 - gpi17p, PER1 - per1p, TED1 - ted1p, PGA1 - pga1p, GPI14 - gpi14p, PBN1 - pbn1p, GPI11 - gpi11p, GUP1 - gup1p, GPI8 - gpi8p, GWT1 - gwt1p, MCD4 - mcd4p, GAA1 - gaa1p]
GO:1903509	liposaccharide metabolic process	1.51e-06	0.000107	4.41	4095	28	498	15	[CSG2 - mannosylinositol phosphorylceramide synthase regulatory subunit, LAS21 - las21p, GPI13 - gpi13p, GPI17 - gpi17p, PER1 - per1p, TED1 - ted1p, PGA1 - pga1p, GPI14 - gpi14p, PBN1 - pbn1p, GPI11 - gpi11p, GUP1 - gup1p, GPI8 - gpi8p, GWT1 - gwt1p, MCD4 - mcd4p, GAA1 - gaa1p]
GO:0048193	Golgi vesicle transport	1.76e-06	0.000122	3.39	4095	163	178	24	[SUR4 - fatty acid elongase sur4, NEO1 - putative aminophospholipid-translocating p4-type atpase neo1, SHR3 - shr3p, UFE1 - ufe1p, ERV29 - erv29p, GET1 - get1p, SEC10 - sec10p, SLY1 - sly1p, YET1 - yet1p, ERD2 - erd2p, SEC24 - sec24p, ERP3 - erp3p, SEC14 - sec14p, ERV25 - erv25p, ERV14 - erv14p, SEC18 - sec18p, SEC6 - sec6p, ERP4 - erp4p, YIP3 - yip3p, YET3 - yet3p, PHO86 - pho86p, ERP2 - erp2p, …
GO:0008202	steroid metabolic process	2.01e-06	0.000138	6.46	4095	44	173	12	[ERG4 - delta(24(24(1)))-sterol reductase, ERG11 - sterol 14-demethylase, ERG5 - c-22 sterol desaturase, YMR134W - hypothetical protein, HMG1 - hydroxymethylglutaryl-coa reductase (nadph) hmg1, ERG1 - squalene monooxygenase, ERG3 - c-5 sterol desaturase, NSG1 - nsg1p, NSG2 - nsg2p, HMG2 - hydroxymethylglutaryl-coa reductase (nadph) hmg2, ERG25 - methylsterol monooxygenase, NCP1 - ncp1p]
GO:0070085	glycosylation	2.13e-06	0.000144	10.25	4095	58	62	9	[PBN1 - pbn1p, SWP1 - swp1p, PMT7 - pmt7p, ALG6 - dolichyl-p-glc:man(9)glcnac(2)-pp-dolichol alpha-1,3-glucosyltransferase, OST1 - ost1p, WBP1 - wbp1p, PSA1 - mannose-1-phosphate guanylyltransferase, PGA1 - pga1p, GPI14 - gpi14p]
GO:0046486	glycerolipid metabolic process	2.71e-06	0.000181	3.94	4095	87	227	19	[LAS21 - las21p, GPI17 - gpi17p, OPI3 - opi3p, PER1 - per1p, SLC1 - 1-acylglycerol-3-phosphate o-acyltransferase slc1, SAC1 - phosphatidylinositol-3-phosphatase sac1, GPT2 - bifunctional glycerol-3-phosphate/glycerone-phosphate o-acyltransferase gpt2, PGA1 - pga1p, GPI14 - gpi14p, PBN1 - pbn1p, GPI11 - gpi11p, SEC14 - sec14p, GUP1 - gup1p, CPT1 - diacylglycerol cholinephosphotransferase, GPI8 - g…
GO:0006644	phospholipid metabolic process	4.86e-06	0.00032	2.45	4095	109	522	34	[OPI10 - opi10p, GPI17 - gpi17p, OPI3 - opi3p, SLC1 - 1-acylglycerol-3-phosphate o-acyltransferase slc1, SAC1 - phosphatidylinositol-3-phosphatase sac1, NTE1 - nte1p, GPT2 - bifunctional glycerol-3-phosphate/glycerone-phosphate o-acyltransferase gpt2, GPI14 - gpi14p, PBN1 - pbn1p, SEC14 - sec14p, GUP1 - gup1p, CMD1 - cmd1p, GPI8 - gpi8p, EPT1 - bifunctional diacylglycerol cholinephosphotransferas…
GO:0006672	ceramide metabolic process	1.14e-05	0.000743	93.07	4095	6	22	3	[ORM2 - orm2p, LAG1 - sphingosine n-acyltransferase lag1, LAC1 - sphingosine n-acyltransferase lac1]
GO:0072594	establishment of protein localization to organelle	1.37e-05	0.00088	1.86	4095	203	598	55	[CUE1 - cue1p, HSP82 - hsp90 family chaperone hsp82, SAM35 - sam35p, SEC65 - sec65p, STI1 - sti1p, BSD2 - bsd2p, SRP1 - srp1p, SPC1 - spc1p, KAP122 - kap122p, NMD5 - nmd5p, PHO88 - pho88p, GLE2 - gle2p, CMD1 - cmd1p, ZIM17 - zim17p, KAP95 - kap95p, COS8 - cos8p, NUP57 - nup57p, NUP157 - nup157p, SSH1 - ssh1p, VID24 - glucose-induced degradation complex subunit vid24, GSP2 - gsp2p, BRO1 - bro1p, S…
GO:0033365	protein localization to organelle	1.39e-05	0.000881	1.69	4095	280	631	73	[YPT7 - ypt7p, HSP82 - hsp90 family chaperone hsp82, CUE1 - cue1p, SAM35 - sam35p, SEC65 - sec65p, STI1 - sti1p, BSD2 - bsd2p, SRP1 - srp1p, YET1 - yet1p, SPC1 - spc1p, KAP122 - kap122p, NMD5 - nmd5p, TID3 - tid3p, BBP1 - bbp1p, PHO88 - pho88p, KAP123 - kap123p, GLE2 - gle2p, CMD1 - cmd1p, ZIM17 - zim17p, KAP95 - kap95p, ARP2 - actin-related protein 2, COS8 - cos8p, NUP57 - nup57p, NUP157 - nup15…
GO:0019637	organophosphate metabolic process	1.66e-05	0.00104	1.5	4095	294	977	105	[LPP1 - phosphatidate phosphatase lpp1, VMA2 - vma2p, URA5 - orotate phosphoribosyltransferase ura5, ENO2 - phosphopyruvate hydratase eno2, SLC1 - 1-acylglycerol-3-phosphate o-acyltransferase slc1, SIS2 - phosphopantothenoylcysteine decarboxylase complex subunit sis2, GPT2 - bifunctional glycerol-3-phosphate/glycerone-phosphate o-acyltransferase gpt2, ALD6 - aldehyde dehydrogenase (nadp(+)) ald6,…
GO:0044283	small molecule biosynthetic process	1.67e-05	0.00103	1.67	4095	248	720	73	[PHS1 - phs1p, TDH2 - tdh2p, TRP5 - tryptophan synthase trp5, YMR134W - hypothetical protein, ARO2 - bifunctional chorismate synthase/riboflavin reductase [nad(p)h] aro2, ERG6 - sterol 24-c-methyltransferase, PDC1 - indolepyruvate decarboxylase 1, PAN6 - pantoate--beta-alanine ligase pan6, ERG4 - delta(24(24(1)))-sterol reductase, ERG5 - c-22 sterol desaturase, NUS1 - nus1p, ENO1 - phosphopyruvat…
GO:0015931	nucleobase-containing compound transport	1.79e-05	0.00109	2.43	4095	174	319	33	[NMD3 - nmd3p, DID4 - did4p, YRA2 - yra2p, NUP192 - nup192p, NSP1 - nsp1p, MSN5 - msn5p, GLE2 - gle2p, NUG1 - nug1p, KAP95 - kap95p, NUP57 - nup57p, NUP157 - nup157p, MCD4 - mcd4p, SIS1 - sis1p, GSP2 - gsp2p, MEX67 - mex67p, HMT1 - hmt1p, NDC1 - ndc1p, BRO1 - bro1p, NIC96 - nic96p, DHH1 - dhh1p, ECM1 - ecm1p, FUI1 - fui1p, NUP49 - nup49p, POM33 - pom33p, APQ12 - apq12p, PER33 - per33p, YDJ1 - ydj…
GO:0016192	vesicle-mediated transport	2.09e-05	0.00126	1.9	4095	343	333	53	[YPT7 - ypt7p, SEC27 - sec27p, PAL1 - pal1p, ERV29 - erv29p, GET1 - get1p, YET1 - yet1p, YIP3 - yip3p, COS8 - cos8p, PHO86 - pho86p, PAN1 - pan1p, RER2 - rer2p, BRO1 - bro1p, NEO1 - putative aminophospholipid-translocating p4-type atpase neo1, UFE1 - ufe1p, SHR3 - shr3p, SEC10 - sec10p, RVS167 - rvs167p, ERD2 - erd2p, ERP3 - erp3p, GVP36 - gvp36p, VPS28 - vps28p, ERV25 - erv25p, KIN1 - kin1p, SEC…
GO:0043436	oxoacid metabolic process	2.36e-05	0.0014	1.44	4095	351	989	122	[PHS1 - phs1p, HOM6 - hom6p, ENO2 - phosphopyruvate hydratase eno2, ARO2 - bifunctional chorismate synthase/riboflavin reductase [nad(p)h] aro2, GRS1 - glycine--trna ligase, SAM2 - methionine adenosyltransferase sam2, ALD6 - aldehyde dehydrogenase (nadp(+)) ald6, FAA3 - long-chain fatty acid-coa ligase faa3, ALA1 - alanine--trna ligase, ASN2 - asparagine synthase (glutamine-hydrolyzing) 2, GLK1 -…
GO:0046488	phosphatidylinositol metabolic process	2.44e-05	0.00143	3.29	4095	45	498	18	[LAS21 - las21p, GPI13 - gpi13p, GPI17 - gpi17p, PER1 - per1p, SAC1 - phosphatidylinositol-3-phosphatase sac1, TED1 - ted1p, PGA1 - pga1p, GPI14 - gpi14p, PBN1 - pbn1p, GPI11 - gpi11p, SEC14 - sec14p, GUP1 - gup1p, CMD1 - cmd1p, GPI8 - gpi8p, GWT1 - gwt1p, PIS1 - cdp-diacylglycerol--inositol 3-phosphatidyltransferase, MCD4 - mcd4p, GAA1 - gaa1p]
GO:0006082	organic acid metabolic process	2.68e-05	0.00156	1.44	4095	352	989	122	[PHS1 - phs1p, HOM6 - hom6p, ENO2 - phosphopyruvate hydratase eno2, ARO2 - bifunctional chorismate synthase/riboflavin reductase [nad(p)h] aro2, GRS1 - glycine--trna ligase, SAM2 - methionine adenosyltransferase sam2, ALD6 - aldehyde dehydrogenase (nadp(+)) ald6, FAA3 - long-chain fatty acid-coa ligase faa3, ALA1 - alanine--trna ligase, ASN2 - asparagine synthase (glutamine-hydrolyzing) 2, GLK1 -…
GO:0071852	fungal-type cell wall organization or biogenesis	2.7e-05	0.00155	3.28	4095	104	240	20	[YLR194C - hypothetical protein, KRE1 - kre1p, UTR2 - utr2p, PAL1 - pal1p, SED1 - sed1p, DFG5 - dfg5p, CCW12 - ccw12p, CRH1 - crh1p, PST1 - pst1p, CCW14 - ccw14p, SLT2 - slt2p, END3 - end3p, CWP1 - cwp1p, ROT1 - rot1p, GPI14 - gpi14p, GAS3 - gas3p, PMT7 - pmt7p, DCW1 - dcw1p, TIP1 - tip1p, YNL194C - hypothetical protein]
GO:0006497	protein lipidation	3.11e-05	0.00176	3.84	4095	30	498	14	[LAS21 - las21p, GPI13 - gpi13p, GPI17 - gpi17p, PER1 - per1p, TED1 - ted1p, PGA1 - pga1p, GPI14 - gpi14p, PBN1 - pbn1p, GPI11 - gpi11p, GUP1 - gup1p, GPI8 - gpi8p, GWT1 - gwt1p, MCD4 - mcd4p, GAA1 - gaa1p]
GO:0019752	carboxylic acid metabolic process	4.01e-05	0.00225	1.44	4095	337	989	117	[PHS1 - phs1p, HOM6 - hom6p, ENO2 - phosphopyruvate hydratase eno2, ARO2 - bifunctional chorismate synthase/riboflavin reductase [nad(p)h] aro2, GRS1 - glycine--trna ligase, SAM2 - methionine adenosyltransferase sam2, ALD6 - aldehyde dehydrogenase (nadp(+)) ald6, FAA3 - long-chain fatty acid-coa ligase faa3, ALA1 - alanine--trna ligase, ASN2 - asparagine synthase (glutamine-hydrolyzing) 2, GLK1 -…
GO:0051028	mRNA transport	4.11e-05	0.00227	3.45	4095	91	235	18	[MEX67 - mex67p, HMT1 - hmt1p, NDC1 - ndc1p, NIC96 - nic96p, YRA2 - yra2p, NUP192 - nup192p, NUP49 - nup49p, POM33 - pom33p, APQ12 - apq12p, NSP1 - nsp1p, PER33 - per33p, GLE2 - gle2p, KAP95 - kap95p, CRM1 - crm1p, BRL1 - brl1p, NUP57 - nup57p, NUP157 - nup157p, NUP1 - nup1p]
GO:0006793	phosphorus metabolic process	5.36e-05	0.00294	1.33	4095	537	991	173	[LPP1 - phosphatidate phosphatase lpp1, VMA2 - vma2p, SIT4 - sit4p, HOM6 - hom6p, URA5 - orotate phosphoribosyltransferase ura5, ENO2 - phosphopyruvate hydratase eno2, SAK1 - sak1p, GIN4 - gin4p, TSL1 - tsl1p, SLC1 - 1-acylglycerol-3-phosphate o-acyltransferase slc1, SIS2 - phosphopantothenoylcysteine decarboxylase complex subunit sis2, CKB2 - ckb2p, ALD6 - aldehyde dehydrogenase (nadp(+)) ald6, …
GO:0050658	RNA transport	6.12e-05	0.00332	2.57	4095	145	297	27	[NMD3 - nmd3p, YRA2 - yra2p, NUP192 - nup192p, NSP1 - nsp1p, NUG1 - nug1p, GLE2 - gle2p, KAP95 - kap95p, NUP57 - nup57p, NUP157 - nup157p, SIS1 - sis1p, GSP2 - gsp2p, HMT1 - hmt1p, NDC1 - ndc1p, MEX67 - mex67p, NIC96 - nic96p, DHH1 - dhh1p, ECM1 - ecm1p, POM33 - pom33p, NUP49 - nup49p, APQ12 - apq12p, PER33 - per33p, YDJ1 - ydj1p, CRM1 - crm1p, BRL1 - brl1p, MTR10 - mtr10p, NUP1 - nup1p, RPS28A -…
GO:0051236	establishment of RNA localization	6.12e-05	0.00328	2.57	4095	145	297	27	[NMD3 - nmd3p, YRA2 - yra2p, NUP192 - nup192p, NSP1 - nsp1p, NUG1 - nug1p, GLE2 - gle2p, KAP95 - kap95p, NUP57 - nup57p, NUP157 - nup157p, SIS1 - sis1p, GSP2 - gsp2p, HMT1 - hmt1p, NDC1 - ndc1p, MEX67 - mex67p, NIC96 - nic96p, DHH1 - dhh1p, ECM1 - ecm1p, POM33 - pom33p, NUP49 - nup49p, APQ12 - apq12p, PER33 - per33p, YDJ1 - ydj1p, CRM1 - crm1p, BRL1 - brl1p, MTR10 - mtr10p, NUP1 - nup1p, RPS28A -…
GO:0050657	nucleic acid transport	7.8e-05	0.00413	2.53	4095	147	297	27	[NMD3 - nmd3p, YRA2 - yra2p, NUP192 - nup192p, NSP1 - nsp1p, NUG1 - nug1p, GLE2 - gle2p, KAP95 - kap95p, NUP57 - nup57p, NUP157 - nup157p, SIS1 - sis1p, GSP2 - gsp2p, HMT1 - hmt1p, NDC1 - ndc1p, MEX67 - mex67p, NIC96 - nic96p, DHH1 - dhh1p, ECM1 - ecm1p, POM33 - pom33p, NUP49 - nup49p, APQ12 - apq12p, PER33 - per33p, YDJ1 - ydj1p, CRM1 - crm1p, BRL1 - brl1p, MTR10 - mtr10p, NUP1 - nup1p, RPS28A -…
GO:1901135	carbohydrate derivative metabolic process	8.39e-05	0.0044	1.52	4095	233	971	84	[MNN9 - mnn9p, DUT1 - bifunctional ditp/dutp diphosphatase, TDH2 - tdh2p, VMA2 - vma2p, URA5 - orotate phosphoribosyltransferase ura5, ENO2 - phosphopyruvate hydratase eno2, YNK1 - nucleoside diphosphate kinase, SIS2 - phosphopantothenoylcysteine decarboxylase complex subunit sis2, VMA1 - vma1p, PDC1 - indolepyruvate decarboxylase 1, PSA1 - mannose-1-phosphate guanylyltransferase, GPI14 - gpi14p,…
GO:0006631	fatty acid metabolic process	9.98e-05	0.00517	11.88	4095	44	47	6	[ELO1 - elo1p, PHS1 - phs1p, FEN1 - fatty acid elongase fen1, OLE1 - stearoyl-coa 9-desaturase, SUR4 - fatty acid elongase sur4, TSC13 - trans-2-enoyl-coa reductase (nadph) tsc13]
GO:0000055	ribosomal large subunit export from nucleus	0.0001	0.00514	5.64	4095	23	284	9	[MEX67 - mex67p, NUG1 - nug1p, NMD3 - nmd3p, NIC96 - nic96p, CRM1 - crm1p, ECM1 - ecm1p, NUP49 - nup49p, NUP1 - nup1p, NSP1 - nsp1p]
GO:0006796	phosphate-containing compound metabolic process	0.000101	0.0051	1.33	4095	509	991	164	[LPP1 - phosphatidate phosphatase lpp1, VMA2 - vma2p, SIT4 - sit4p, HOM6 - hom6p, URA5 - orotate phosphoribosyltransferase ura5, ENO2 - phosphopyruvate hydratase eno2, SAK1 - sak1p, GIN4 - gin4p, TSL1 - tsl1p, SLC1 - 1-acylglycerol-3-phosphate o-acyltransferase slc1, SIS2 - phosphopantothenoylcysteine decarboxylase complex subunit sis2, CKB2 - ckb2p, ALD6 - aldehyde dehydrogenase (nadp(+)) ald6, …
GO:1901615	organic hydroxy compound metabolic process	0.000115	0.00578	2.1	4095	100	662	34	[OPI10 - opi10p, YMR134W - hypothetical protein, DAK1 - dak1p, ERG6 - sterol 24-c-methyltransferase, PDC1 - indolepyruvate decarboxylase 1, GLO1 - lactoylglutathione lyase glo1, ERG11 - sterol 14-demethylase, ERG4 - delta(24(24(1)))-sterol reductase, ERG27 - 3-keto-steroid reductase, GUP1 - gup1p, ERG5 - c-22 sterol desaturase, NUS1 - nus1p, GLO2 - hydroxyacylglutathione hydrolase glo2, VIP1 - in…
GO:0072330	monocarboxylic acid biosynthetic process	0.000129	0.00641	11.36	4095	46	47	6	[ELO1 - elo1p, PHS1 - phs1p, FEN1 - fatty acid elongase fen1, OLE1 - stearoyl-coa 9-desaturase, SUR4 - fatty acid elongase sur4, TSC13 - trans-2-enoyl-coa reductase (nadph) tsc13]
GO:0031204	posttranslational protein targeting to membrane, translocation	0.000133	0.00653	8.41	4095	10	292	6	[SEC66 - sec66p, SEC72 - sec72p, SEC62 - sec62p, SEC63 - sec63p, SEC61 - sec61p, SBH1 - sbh1p]
GO:1901137	carbohydrate derivative biosynthetic process	0.000141	0.00686	1.67	4095	149	971	59	[MNN9 - mnn9p, DUT1 - bifunctional ditp/dutp diphosphatase, URA5 - orotate phosphoribosyltransferase ura5, YNK1 - nucleoside diphosphate kinase, SIS2 - phosphopantothenoylcysteine decarboxylase complex subunit sis2, PSA1 - mannose-1-phosphate guanylyltransferase, GPI14 - gpi14p, PBN1 - pbn1p, ALG1 - chitobiosyldiphosphodolichol beta-1,4 mannosyltransferase, GPI8 - gpi8p, SHB17 - shb17p, ATP19 - a…
GO:0046513	ceramide biosynthetic process	0.000154	0.00743	124.09	4095	3	22	2	[LAG1 - sphingosine n-acyltransferase lag1, LAC1 - sphingosine n-acyltransferase lac1]
GO:0006457	protein folding	0.000167	0.00799	2.54	4095	96	403	24	[SIS1 - sis1p, SNL1 - snl1p, STI1 - sti1p, SHR3 - shr3p, SGT2 - sgt2p, ROT1 - rot1p, ERJ5 - erj5p, YDJ1 - ydj1p, EMC6 - emc6p, SSE1 - sse1p, EMC2 - emc2p, RBL2 - rbl2p, ZIM17 - zim17p, SSE2 - sse2p, EMC1 - emc1p, SSA1 - hsp70 family atpase ssa1, FPR1 - peptidylprolyl isomerase fpr1, PHO86 - pho86p, EMC5 - emc5p, SBA1 - sba1p, HSC82 - hsp90 family chaperone hsc82, GET3 - guanine nucleotide exchang…
GO:0006066	alcohol metabolic process	0.000168	0.00795	2.39	4095	72	594	25	[OPI10 - opi10p, YMR134W - hypothetical protein, DAK1 - dak1p, ERG6 - sterol 24-c-methyltransferase, PDC1 - indolepyruvate decarboxylase 1, ERG4 - delta(24(24(1)))-sterol reductase, ERG11 - sterol 14-demethylase, ERG5 - c-22 sterol desaturase, GUP1 - gup1p, ERG27 - 3-keto-steroid reductase, NUS1 - nus1p, VIP1 - inositol polyphosphate kinase vip1, ERG1 - squalene monooxygenase, ERG25 - methylstero…
GO:0006613	cotranslational protein targeting to membrane	0.000184	0.00862	5.46	4095	9	583	7	[SRP14 - srp14p, SEC65 - sec65p, HRI1 - hri1p, SRP102 - srp102p, SEC63 - sec63p, SRP72 - srp72p, SSH1 - ssh1p]
GO:0006890	retrograde vesicle-mediated transport, Golgi to ER	0.000199	0.00921	3.55	4095	31	484	13	[SEC21 - sec21p, DSL1 - dsl1p, SEC27 - sec27p, SEC39 - sec39p, NEO1 - putative aminophospholipid-translocating p4-type atpase neo1, UFE1 - ufe1p, GET1 - get1p, SLY1 - sly1p, SEC28 - sec28p, RET3 - ret3p, RET2 - ret2p, USE1 - use1p, GET3 - guanine nucleotide exchange factor get3]
GO:0006487	protein N-linked glycosylation	0.000215	0.00989	6.22	4095	27	195	8	[SWP1 - swp1p, CAX4 - cax4p, ALG6 - dolichyl-p-glc:man(9)glcnac(2)-pp-dolichol alpha-1,3-glucosyltransferase, ALG5 - dolichyl-phosphate beta-glucosyltransferase, OST1 - ost1p, WBP1 - wbp1p, ROT1 - rot1p, OST4 - ost4p]
GO:0006486	protein glycosylation	0.00023	0.0105	4.53	4095	51	195	11	[SWP1 - swp1p, CAX4 - cax4p, PMT7 - pmt7p, ALG6 - dolichyl-p-glc:man(9)glcnac(2)-pp-dolichol alpha-1,3-glucosyltransferase, ALG5 - dolichyl-phosphate beta-glucosyltransferase, OST1 - ost1p, WBP1 - wbp1p, PSA1 - mannose-1-phosphate guanylyltransferase, ROT1 - rot1p, OST4 - ost4p, RER2 - rer2p]
GO:0043413	macromolecule glycosylation	0.00023	0.0104	4.53	4095	51	195	11	[SWP1 - swp1p, CAX4 - cax4p, PMT7 - pmt7p, ALG6 - dolichyl-p-glc:man(9)glcnac(2)-pp-dolichol alpha-1,3-glucosyltransferase, ALG5 - dolichyl-phosphate beta-glucosyltransferase, OST1 - ost1p, WBP1 - wbp1p, PSA1 - mannose-1-phosphate guanylyltransferase, ROT1 - rot1p, OST4 - ost4p, RER2 - rer2p]
GO:0006612	protein targeting to membrane	0.000291	0.013	4.15	4095	33	329	11	[VPS28 - vps28p, SEC65 - sec65p, HRI1 - hri1p, KAP95 - kap95p, SRP1 - srp1p, SEC63 - sec63p, SGT2 - sgt2p, MDY2 - mdy2p, GET3 - guanine nucleotide exchange factor get3, SSH1 - ssh1p, SRP72 - srp72p]
GO:0071988	protein localization to spindle pole body	0.000311	0.0138	113.75	4095	4	18	2	[KIN4 - kin4p, BBP1 - bbp1p]
GO:0072698	protein localization to microtubule cytoskeleton	0.000311	0.0136	113.75	4095	4	18	2	[KIN4 - kin4p, BBP1 - bbp1p]
GO:1905508	protein localization to microtubule organizing center	0.000311	0.0135	113.75	4095	4	18	2	[KIN4 - kin4p, BBP1 - bbp1p]
GO:0019693	ribose phosphate metabolic process	0.000325	0.014	1.75	4095	111	971	46	[TDH2 - tdh2p, VMA2 - vma2p, URA5 - orotate phosphoribosyltransferase ura5, ENO2 - phosphopyruvate hydratase eno2, IMD4 - imp dehydrogenase imd4, YNK1 - nucleoside diphosphate kinase, SIS2 - phosphopantothenoylcysteine decarboxylase complex subunit sis2, PDC1 - indolepyruvate decarboxylase 1, VMA1 - vma1p, ATP5 - atp5p, PRS4 - ribose phosphate diphosphokinase subunit prs4, ATP20 - atp20p, URA4 - …
GO:0051656	establishment of organelle localization	0.00038	0.0163	2.35	4095	75	557	24	[GSP2 - gsp2p, SEC21 - sec21p, MEX67 - mex67p, NMD3 - nmd3p, CIK1 - cik1p, NIC96 - nic96p, ARC18 - arc18p, BIK1 - bik1p, KIP3 - tubulin-dependent atpase kip3, ECM1 - ecm1p, MPS3 - mps3p, MYO2 - myosin 2, NUP49 - nup49p, NSP1 - nsp1p, NUG1 - nug1p, NOP9 - nop9p, BUD23 - bud23p, CRM1 - crm1p, MTR2 - mtr2p, ARX1 - arx1p, ARP2 - actin-related protein 2, KAR3 - kar3p, BIM1 - bim1p, NUP1 - nup1p]
GO:0031505	fungal-type cell wall organization	0.00046	0.0195	1.95	4095	92	777	34	[YLR194C - hypothetical protein, MYO3 - myosin 3, YPS1 - yps1p, KRE1 - kre1p, SED1 - sed1p, SIT4 - sit4p, CCW12 - ccw12p, CCW14 - ccw14p, BGL2 - bgl2p, VPS54 - vps54p, GPI14 - gpi14p, PIR1 - pir1p, PRS4 - ribose phosphate diphosphokinase subunit prs4, SLA2 - sla2p, ARP2 - actin-related protein 2, GAS1 - gas1p, UTR2 - utr2p, SNF1 - snf1p, EXG2 - exg2p, SOD1 - sod1p, CRH1 - crh1p, PST1 - pst1p, PRS…
GO:0006621	protein retention in ER lumen	0.000477	0.02	6.62	4095	10	371	6	[EMP24 - emp24p, ERP4 - erp4p, ERP2 - erp2p, ERP1 - erp1p, ERD2 - erd2p, ERP3 - erp3p]
GO:0034314	Arp2/3 complex-mediated actin nucleation	0.000536	0.0223	4.49	4095	6	913	6	[ARC35 - arc35p, ARC18 - arc18p, ARP2 - actin-related protein 2, ARC19 - arc19p, ARC15 - arc15p, ARC40 - arc40p]
GO:0009073	aromatic amino acid family biosynthetic process	0.000583	0.0241	3.04	4095	15	989	11	[ARO1 - pentafunctional protein aro1p, ARO7 - chorismate mutase aro7, TRP5 - tryptophan synthase trp5, TRP1 - phosphoribosylanthranilate isomerase trp1, ARO3 - 3-deoxy-7-phosphoheptulonate synthase aro3, ARO2 - bifunctional chorismate synthase/riboflavin reductase [nad(p)h] aro2, ARO8 - bifunctional 2-aminoadipate transaminase/aromatic-amino-acid:2-oxoglutarate transaminase, TRP2 - anthranilate s…
GO:0016485	protein processing	0.000604	0.0247	8.34	4095	31	95	6	[PBN1 - pbn1p, MAP1 - map1p, SPC2 - spc2p, STE24 - ste24p, SEC11 - sec11p, SPC1 - spc1p]
GO:0006913	nucleocytoplasmic transport	0.000604	0.0245	1.75	4095	118	873	44	[YRA2 - yra2p, RPS28B - ribosomal 40s subunit protein s28b, SRP1 - srp1p, NUP170 - nup170p, SAC3 - sac3p, NMD5 - nmd5p, KAP122 - kap122p, KAP120 - kap120p, NSP1 - nsp1p, MSN5 - msn5p, KAP123 - kap123p, CMD1 - cmd1p, GLE2 - gle2p, YRB2 - yrb2p, RTG2 - rtg2p, KAP95 - kap95p, NUP57 - nup57p, RPS19B - ribosomal 40s subunit protein s19b, NUP157 - nup157p, ACC1 - acetyl-coa carboxylase acc1, PBS2 - pbs…
GO:0072657	protein localization to membrane	0.000708	0.0285	2.87	4095	82	296	17	[SEC65 - sec65p, SRP1 - srp1p, GET1 - get1p, SGT2 - sgt2p, SEC63 - sec63p, SRP72 - srp72p, TIM18 - tim18p, SEC14 - sec14p, VPS28 - vps28p, KAP95 - kap95p, SEC18 - sec18p, ICE2 - ice2p, NUP57 - nup57p, MDY2 - mdy2p, NUP157 - nup157p, GET3 - guanine nucleotide exchange factor get3, SSH1 - ssh1p]
GO:0070973	protein localization to endoplasmic reticulum exit site	0.000711	0.0284	59.35	4095	3	46	2	[YET3 - yet3p, YET1 - yet1p]
GO:0034032	purine nucleoside bisphosphate metabolic process	0.000727	0.0288	102.38	4095	8	10	2	[HMG1 - hydroxymethylglutaryl-coa reductase (nadph) hmg1, HMG2 - hydroxymethylglutaryl-coa reductase (nadph) hmg2]
GO:0015936	coenzyme A metabolic process	0.000727	0.0286	102.38	4095	8	10	2	[HMG1 - hydroxymethylglutaryl-coa reductase (nadph) hmg1, HMG2 - hydroxymethylglutaryl-coa reductase (nadph) hmg2]
GO:0033865	nucleoside bisphosphate metabolic process	0.000727	0.0283	102.38	4095	8	10	2	[HMG1 - hydroxymethylglutaryl-coa reductase (nadph) hmg1, HMG2 - hydroxymethylglutaryl-coa reductase (nadph) hmg2]
GO:0033875	ribonucleoside bisphosphate metabolic process	0.000727	0.0281	102.38	4095	8	10	2	[HMG1 - hydroxymethylglutaryl-coa reductase (nadph) hmg1, HMG2 - hydroxymethylglutaryl-coa reductase (nadph) hmg2]
GO:0032787	monocarboxylic acid metabolic process	0.000738	0.0283	1.69	4095	129	902	48	[AIM45 - aim45p, PHS1 - phs1p, TDH2 - tdh2p, YLR118C - palmitoyl-(protein) hydrolase, DLD3 - dld3p, ENO2 - phosphopyruvate hydratase eno2, PDC1 - indolepyruvate decarboxylase 1, GLO1 - lactoylglutathione lyase glo1, ALD6 - aldehyde dehydrogenase (nadp(+)) ald6, PAN6 - pantoate--beta-alanine ligase pan6, FAA3 - long-chain fatty acid-coa ligase faa3, FAA4 - long-chain fatty acid-coa ligase faa4, AS…
GO:0016255	attachment of GPI anchor to protein	0.000844	0.0321	13.08	4095	3	313	3	[GPI8 - gpi8p, GPI17 - gpi17p, GAA1 - gaa1p]
GO:0006614	SRP-dependent cotranslational protein targeting to membrane	0.000867	0.0327	5.27	4095	8	583	6	[SRP14 - srp14p, SEC65 - sec65p, SRP102 - srp102p, SEC63 - sec63p, SSH1 - ssh1p, SRP72 - srp72p]
GO:0006465	signal peptide processing	0.000877	0.0329	23.4	4095	7	75	3	[SPC2 - spc2p, SPC1 - spc1p, SEC11 - sec11p]
GO:0035437	maintenance of protein localization in endoplasmic reticulum	0.000946	0.0352	6.02	4095	11	371	6	[EMP24 - emp24p, ERP4 - erp4p, ERP2 - erp2p, ERD2 - erd2p, ERP1 - erp1p, ERP3 - erp3p]

## Sheet: Spc42 Component
GO Term	Description	P-value	FDR q-value	Enrichment	N	B	n	b	Genes
GO:0005783	endoplasmic reticulum	5.45e-62	5.48e-59	4.07	4095	476	321	152	[SNL1 - snl1p, PHS1 - phs1p, GNP1 - gnp1p, YMR134W - hypothetical protein, SLC1 - 1-acylglycerol-3-phosphate o-acyltransferase slc1, GPT2 - bifunctional glycerol-3-phosphate/glycerone-phosphate o-acyltransferase gpt2, ERJ5 - erj5p, PHO88 - pho88p, PBN1 - pbn1p, ALG1 - chitobiosyldiphosphodolichol beta-1,4 mannosyltransferase, YIP3 - yip3p, PKR1 - pkr1p, PHO86 - pho86p, YMR122W-A - hypothetical pr…
GO:0005789	endoplasmic reticulum membrane	3.13e-53	1.57e-50	8.58	4095	281	124	73	[PHS1 - phs1p, SNL1 - snl1p, GET1 - get1p, WBP1 - wbp1p, YET1 - yet1p, SPC1 - spc1p, IRC22 - irc22p, ERJ5 - erj5p, GPI14 - gpi14p, PBN1 - pbn1p, PHO88 - pho88p, ORM2 - orm2p, PKR1 - pkr1p, SSH1 - ssh1p, RER2 - rer2p, PGA2 - pga2p, SHR3 - shr3p, UFE1 - ufe1p, CBR1 - cbr1p, HMG2 - hydroxymethylglutaryl-coa reductase (nadph) hmg2, SEC11 - sec11p, TSC13 - trans-2-enoyl-coa reductase (nadph) tsc13, PO…
GO:0044432	endoplasmic reticulum part	9.3e-53	3.12e-50	7.84	4095	320	124	76	[PHS1 - phs1p, SNL1 - snl1p, GET1 - get1p, WBP1 - wbp1p, YET1 - yet1p, SPC1 - spc1p, IRC22 - irc22p, GPT2 - bifunctional glycerol-3-phosphate/glycerone-phosphate o-acyltransferase gpt2, ERJ5 - erj5p, GPI14 - gpi14p, ERG4 - delta(24(24(1)))-sterol reductase, PBN1 - pbn1p, PHO88 - pho88p, ORM2 - orm2p, PKR1 - pkr1p, RER2 - rer2p, SSH1 - ssh1p, PGA2 - pga2p, SHR3 - shr3p, UFE1 - ufe1p, CBR1 - cbr1p,…
GO:0031224	intrinsic component of membrane	1.35e-47	3.4e-45	2.71	4095	875	319	185	[YLR194C - hypothetical protein, SNL1 - snl1p, PHS1 - phs1p, KRE1 - kre1p, GNP1 - gnp1p, YMR134W - hypothetical protein, EGT2 - egt2p, SLC1 - 1-acylglycerol-3-phosphate o-acyltransferase slc1, GPT2 - bifunctional glycerol-3-phosphate/glycerone-phosphate o-acyltransferase gpt2, ERJ5 - erj5p, PHO88 - pho88p, PBN1 - pbn1p, GLE2 - gle2p, ALG1 - chitobiosyldiphosphodolichol beta-1,4 mannosyltransferas…
GO:0044425	membrane part	2.07e-44	4.16e-42	2.37	4095	1097	325	206	[YLR194C - hypothetical protein, PHS1 - phs1p, SEC27 - sec27p, GNP1 - gnp1p, YMR134W - hypothetical protein, SLC1 - 1-acylglycerol-3-phosphate o-acyltransferase slc1, GPT2 - bifunctional glycerol-3-phosphate/glycerone-phosphate o-acyltransferase gpt2, PBN1 - pbn1p, GLE2 - gle2p, YIP3 - yip3p, PHO86 - pho86p, PKR1 - pkr1p, COS8 - cos8p, YMR122W-A - hypothetical protein, NUP157 - nup157p, AGP1 - ag…
GO:0016021	integral component of membrane	5.45e-38	9.13e-36	2.57	4095	845	319	169	[SNL1 - snl1p, PHS1 - phs1p, KRE1 - kre1p, GNP1 - gnp1p, YMR134W - hypothetical protein, SLC1 - 1-acylglycerol-3-phosphate o-acyltransferase slc1, GPT2 - bifunctional glycerol-3-phosphate/glycerone-phosphate o-acyltransferase gpt2, ERJ5 - erj5p, PHO88 - pho88p, PBN1 - pbn1p, GLE2 - gle2p, ALG1 - chitobiosyldiphosphodolichol beta-1,4 mannosyltransferase, YIP3 - yip3p, COS8 - cos8p, PKR1 - pkr1p, P…
GO:0016020	membrane	1.04e-34	1.5e-32	2.01	4095	1338	330	217	[YLR194C - hypothetical protein, PHS1 - phs1p, SEC27 - sec27p, GNP1 - gnp1p, YMR134W - hypothetical protein, SLC1 - 1-acylglycerol-3-phosphate o-acyltransferase slc1, GPT2 - bifunctional glycerol-3-phosphate/glycerone-phosphate o-acyltransferase gpt2, PBN1 - pbn1p, GLE2 - gle2p, YIP3 - yip3p, PHO86 - pho86p, PKR1 - pkr1p, COS8 - cos8p, YMR122W-A - hypothetical protein, NUP157 - nup157p, FAA1 - lo…
GO:0031227	intrinsic component of endoplasmic reticulum membrane	1.86e-13	2.34e-11	4.43	4095	54	531	31	[CUE1 - cue1p, PHS1 - phs1p, ERV41 - erv41p, CAX4 - cax4p, CUE4 - cue4p, SAC1 - phosphatidylinositol-3-phosphatase sac1, SPC1 - spc1p, GPT2 - bifunctional glycerol-3-phosphate/glycerone-phosphate o-acyltransferase gpt2, ERG4 - delta(24(24(1)))-sterol reductase, ELO1 - elo1p, SRP102 - srp102p, PKR1 - pkr1p, MMM1 - mmm1p, USE1 - use1p, GSF2 - gsf2p, CSG2 - mannosylinositol phosphorylceramide syntha…
GO:0030176	integral component of endoplasmic reticulum membrane	2.46e-13	2.75e-11	11.73	4095	53	112	17	[PHS1 - phs1p, FEN1 - fatty acid elongase fen1, LAS21 - las21p, SUR4 - fatty acid elongase sur4, SHR3 - shr3p, SAC1 - phosphatidylinositol-3-phosphatase sac1, SPC1 - spc1p, GPT2 - bifunctional glycerol-3-phosphate/glycerone-phosphate o-acyltransferase gpt2, PGA1 - pga1p, ERD2 - erd2p, ERG4 - delta(24(24(1)))-sterol reductase, ELO1 - elo1p, OLE1 - stearoyl-coa 9-desaturase, PKR1 - pkr1p, ICE2 - ic…
GO:0031225	anchored component of membrane	2.72e-13	2.74e-11	7.04	4095	35	349	21	[YLR194C - hypothetical protein, KRE1 - kre1p, SED1 - sed1p, UTR2 - utr2p, DFG5 - dfg5p, YJL171C - hypothetical protein, EGT2 - egt2p, CCW12 - ccw12p, EXG2 - exg2p, CRH1 - crh1p, PST1 - pst1p, CCW14 - ccw14p, CWP1 - cwp1p, CWP2 - cwp2p, GAS3 - gas3p, DCW1 - dcw1p, PRY3 - pry3p, AGA1 - aga1p, TIP1 - tip1p, GAS1 - gas1p, TOS6 - tos6p]
GO:0044444	cytoplasmic part	1.23e-12	1.12e-10	1.27	4095	2538	393	310	[YLR194C - hypothetical protein, PHS1 - phs1p, SEC27 - sec27p, GNP1 - gnp1p, YMR134W - hypothetical protein, MRP10 - mitochondrial 37s ribosomal protein yms-t, SLC1 - 1-acylglycerol-3-phosphate o-acyltransferase slc1, ARO2 - bifunctional chorismate synthase/riboflavin reductase [nad(p)h] aro2, GPT2 - bifunctional glycerol-3-phosphate/glycerone-phosphate o-acyltransferase gpt2, PBN1 - pbn1p, VMA4 …
GO:0044446	intracellular organelle part	1.66e-09	1.39e-07	1.44	4095	2347	147	121	[TFA2 - tfa2p, SNL1 - snl1p, PHS1 - phs1p, GNP1 - gnp1p, MRP10 - mitochondrial 37s ribosomal protein yms-t, YMR134W - hypothetical protein, GPT2 - bifunctional glycerol-3-phosphate/glycerone-phosphate o-acyltransferase gpt2, ERJ5 - erj5p, PBN1 - pbn1p, PHO88 - pho88p, GLE2 - gle2p, YIP3 - yip3p, PKR1 - pkr1p, NUP57 - nup57p, BRO1 - bro1p, POL30 - pol30p, UFE1 - ufe1p, CBR1 - cbr1p, HMG2 - hydroxy…
GO:0044422	organelle part	1.84e-09	1.42e-07	1.43	4095	2350	147	121	[TFA2 - tfa2p, SNL1 - snl1p, PHS1 - phs1p, GNP1 - gnp1p, MRP10 - mitochondrial 37s ribosomal protein yms-t, YMR134W - hypothetical protein, GPT2 - bifunctional glycerol-3-phosphate/glycerone-phosphate o-acyltransferase gpt2, ERJ5 - erj5p, PBN1 - pbn1p, PHO88 - pho88p, GLE2 - gle2p, YIP3 - yip3p, PKR1 - pkr1p, NUP57 - nup57p, BRO1 - bro1p, POL30 - pol30p, UFE1 - ufe1p, CBR1 - cbr1p, HMG2 - hydroxy…
GO:0031965	nuclear membrane	4.93e-08	3.54e-06	4.26	4095	78	271	22	[SNL1 - snl1p, NDC1 - ndc1p, NIC96 - nic96p, PGA2 - pga2p, SEC63 - sec63p, UIP3 - uip3p, NUP49 - nup49p, APQ12 - apq12p, NSP1 - nsp1p, NVJ1 - nvj1p, GLE2 - gle2p, SSM4 - e3 ubiquitin-protein ligase ssm4, KAP95 - kap95p, BRL1 - brl1p, MTR10 - mtr10p, STE14 - ste14p, GTT3 - gtt3p, SWH1 - swh1p, NUP57 - nup57p, STE24 - ste24p, NUP157 - nup157p, NUP1 - nup1p]
GO:0030312	external encapsulating structure	7.8e-08	5.23e-06	4.49	4095	64	285	20	[YLR194C - hypothetical protein, TDH2 - tdh2p, KRE1 - kre1p, UTR2 - utr2p, SED1 - sed1p, YJL171C - hypothetical protein, EGT2 - egt2p, CCW12 - ccw12p, CRH1 - crh1p, PST1 - pst1p, CCW14 - ccw14p, CWP1 - cwp1p, GAS3 - gas3p, PRY3 - pry3p, AGA1 - aga1p, SSA1 - hsp70 family atpase ssa1, TIP1 - tip1p, GAS1 - gas1p, MCD4 - mcd4p, TOS6 - tos6p]
GO:0005618	cell wall	7.8e-08	4.9e-06	4.49	4095	64	285	20	[YLR194C - hypothetical protein, TDH2 - tdh2p, KRE1 - kre1p, UTR2 - utr2p, SED1 - sed1p, YJL171C - hypothetical protein, EGT2 - egt2p, CCW12 - ccw12p, CRH1 - crh1p, PST1 - pst1p, CCW14 - ccw14p, CWP1 - cwp1p, GAS3 - gas3p, PRY3 - pry3p, AGA1 - aga1p, SSA1 - hsp70 family atpase ssa1, TIP1 - tip1p, GAS1 - gas1p, MCD4 - mcd4p, TOS6 - tos6p]
GO:0009277	fungal-type cell wall	7.8e-08	4.61e-06	4.49	4095	64	285	20	[YLR194C - hypothetical protein, TDH2 - tdh2p, KRE1 - kre1p, UTR2 - utr2p, SED1 - sed1p, YJL171C - hypothetical protein, EGT2 - egt2p, CCW12 - ccw12p, CRH1 - crh1p, PST1 - pst1p, CCW14 - ccw14p, CWP1 - cwp1p, GAS3 - gas3p, PRY3 - pry3p, AGA1 - aga1p, SSA1 - hsp70 family atpase ssa1, TIP1 - tip1p, GAS1 - gas1p, MCD4 - mcd4p, TOS6 - tos6p]
GO:0030134	COPII-coated ER to Golgi transport vesicle	1.67e-07	9.33e-06	5.14	4095	21	531	14	[ERV41 - erv41p, GOT1 - got1p, SLY1 - sly1p, ERV29 - erv29p, GAP1 - gap1p, ERP3 - erp3p, ERV25 - erv25p, EMP24 - emp24p, ERV14 - erv14p, ERP4 - erp4p, YIP3 - yip3p, GAS1 - gas1p, ERP2 - erp2p, ERP1 - erp1p]
GO:0010494	cytoplasmic stress granule	3.63e-07	1.92e-05	2.2	4095	85	942	43	[SUI2 - sui2p, BMH1 - bmh1p, HCR1 - hcr1p, TMA19 - tma19p, VMA2 - vma2p, FUN12 - fun12p, SUP35 - sup35p, SSD1 - ssd1p, HRP1 - hrp1p, SES1 - serine--trna ligase ses1, TIF4631 - tif4631p, RPB2 - rpb2p, GIS2 - gis2p, PPH21 - pph21p, PRT1 - prt1p, SAM2 - methionine adenosyltransferase sam2, SBP1 - sbp1p, FAA4 - long-chain fatty acid-coa ligase faa4, CBK1 - cbk1p, KAP123 - kap123p, NIP1 - nip1p, LEU1 …
GO:0005635	nuclear envelope	1.06e-06	5.33e-05	2.74	4095	58	721	28	[SNL1 - snl1p, YMR134W - hypothetical protein, WBP1 - wbp1p, SAC3 - sac3p, UIP3 - uip3p, NMD5 - nmd5p, KAP122 - kap122p, NSR1 - nsr1p, KAP120 - kap120p, BRR6 - brr6p, NUS1 - nus1p, UBX7 - ubx7p, SNF7 - snf7p, COS8 - cos8p, SEC39 - sec39p, PGA2 - pga2p, HMG1 - hydroxymethylglutaryl-coa reductase (nadph) hmg1, MPS3 - mps3p, SXM1 - sxm1p, HMG2 - hydroxymethylglutaryl-coa reductase (nadph) hmg2, NUP4…
GO:0031975	envelope	1.08e-06	5.19e-05	7.12	4095	67	103	12	[TIM18 - tim18p, SNL1 - snl1p, PGA2 - pga2p, YMR134W - hypothetical protein, HMG1 - hydroxymethylglutaryl-coa reductase (nadph) hmg1, BRL1 - brl1p, WBP1 - wbp1p, UIP3 - uip3p, HMG2 - hydroxymethylglutaryl-coa reductase (nadph) hmg2, PGA1 - pga1p, APQ12 - apq12p, NVJ1 - nvj1p]
GO:0031967	organelle envelope	1.08e-06	4.96e-05	7.12	4095	67	103	12	[TIM18 - tim18p, SNL1 - snl1p, PGA2 - pga2p, YMR134W - hypothetical protein, HMG1 - hydroxymethylglutaryl-coa reductase (nadph) hmg1, BRL1 - brl1p, WBP1 - wbp1p, UIP3 - uip3p, HMG2 - hydroxymethylglutaryl-coa reductase (nadph) hmg2, PGA1 - pga1p, APQ12 - apq12p, NVJ1 - nvj1p]
GO:0002178	palmitoyltransferase complex	5.12e-06	0.000224	14.73	4095	5	278	5	[LCB2 - serine c-palmitoyltransferase lcb2, ORM1 - orm1p, LCB1 - serine c-palmitoyltransferase lcb1, ORM2 - orm2p, SAC1 - phosphatidylinositol-3-phosphatase sac1]
GO:0031211	endoplasmic reticulum palmitoyltransferase complex	5.12e-06	0.000215	14.73	4095	5	278	5	[LCB2 - serine c-palmitoyltransferase lcb2, ORM1 - orm1p, ORM2 - orm2p, LCB1 - serine c-palmitoyltransferase lcb1, SAC1 - phosphatidylinositol-3-phosphatase sac1]
GO:0035339	SPOTS complex	5.12e-06	0.000206	14.73	4095	5	278	5	[LCB2 - serine c-palmitoyltransferase lcb2, ORM1 - orm1p, ORM2 - orm2p, LCB1 - serine c-palmitoyltransferase lcb1, SAC1 - phosphatidylinositol-3-phosphatase sac1]
GO:0017059	serine C-palmitoyltransferase complex	5.12e-06	0.000198	14.73	4095	5	278	5	[LCB2 - serine c-palmitoyltransferase lcb2, ORM1 - orm1p, LCB1 - serine c-palmitoyltransferase lcb1, ORM2 - orm2p, SAC1 - phosphatidylinositol-3-phosphatase sac1]
GO:0005829	cytosol	6.64e-06	0.000247	1.34	4095	610	987	197	[SAK1 - sak1p, ARO2 - bifunctional chorismate synthase/riboflavin reductase [nad(p)h] aro2, RPL23B - ribosomal 60s subunit protein l23b, SAM2 - methionine adenosyltransferase sam2, KAR4 - kar4p, ADE17 - bifunctional phosphoribosylaminoimidazolecarboxamide formyltransferase/imp cyclohydrolase ade17, GLK1 - glucokinase, GRH1 - grh1p, EMI2 - putative glucokinase, SSA4 - hsp70 family chaperone ssa4, …
GO:0005576	extracellular region	1.69e-05	0.000605	3.97	4095	62	266	16	[KRE1 - kre1p, SED1 - sed1p, UTR2 - utr2p, EGT2 - egt2p, CCW12 - ccw12p, CRH1 - crh1p, CCW14 - ccw14p, PST1 - pst1p, CWP1 - cwp1p, GAS3 - gas3p, PRY3 - pry3p, AGA1 - aga1p, SSA1 - hsp70 family atpase ssa1, TIP1 - tip1p, GAS1 - gas1p, TOS6 - tos6p]
GO:0036464	cytoplasmic ribonucleoprotein granule	2.15e-05	0.000747	1.85	4095	120	942	51	[SUI2 - sui2p, HCR1 - hcr1p, TMA19 - tma19p, VMA2 - vma2p, FUN12 - fun12p, PRT1 - prt1p, SAM2 - methionine adenosyltransferase sam2, SBP1 - sbp1p, CBK1 - cbk1p, FAA4 - long-chain fatty acid-coa ligase faa4, KAP123 - kap123p, LEU1 - 3-isopropylmalate dehydratase leu1, LSM1 - lsm1p, PBS2 - pbs2p, ARC1 - arc1p, LSM3 - lsm3p, RPG1 - rpg1p, YVH1 - yvh1p, PSP2 - psp2p, SEC53 - phosphomannomutase sec53,…
GO:0035770	ribonucleoprotein granule	2.15e-05	0.000722	1.85	4095	120	942	51	[SUI2 - sui2p, HCR1 - hcr1p, TMA19 - tma19p, VMA2 - vma2p, FUN12 - fun12p, PRT1 - prt1p, SAM2 - methionine adenosyltransferase sam2, SBP1 - sbp1p, CBK1 - cbk1p, FAA4 - long-chain fatty acid-coa ligase faa4, KAP123 - kap123p, LEU1 - 3-isopropylmalate dehydratase leu1, LSM1 - lsm1p, PBS2 - pbs2p, ARC1 - arc1p, LSM3 - lsm3p, YVH1 - yvh1p, RPG1 - rpg1p, PSP2 - psp2p, SEC53 - phosphomannomutase sec53,…
GO:0005643	nuclear pore	3.31e-05	0.00107	4.28	4095	57	235	14	[NDC1 - ndc1p, MEX67 - mex67p, NIC96 - nic96p, SRP1 - srp1p, NUP192 - nup192p, POM33 - pom33p, NUP49 - nup49p, NSP1 - nsp1p, PER33 - per33p, GLE2 - gle2p, KAP95 - kap95p, NUP57 - nup57p, NUP157 - nup157p, NUP1 - nup1p]
GO:0061576	acyl-CoA ceramide synthase complex	5.51e-05	0.00173	186.14	4095	2	22	2	[LAG1 - sphingosine n-acyltransferase lag1, LAC1 - sphingosine n-acyltransferase lac1]
GO:0008250	oligosaccharyltransferase complex	6.05e-05	0.00185	22.94	4095	7	102	4	[SWP1 - swp1p, WBP1 - wbp1p, OST1 - ost1p, OST4 - ost4p]
GO:0005787	signal peptidase complex	6.43e-05	0.0019	40.95	4095	4	75	3	[SPC2 - spc2p, SPC1 - spc1p, SEC11 - sec11p]
GO:0031207	Sec62/Sec63 complex	6.84e-05	0.00197	14.02	4095	4	292	4	[SEC66 - sec66p, SEC72 - sec72p, SEC62 - sec62p, SEC63 - sec63p]
GO:0044430	cytoskeletal part	8.75e-05	0.00245	1.62	4095	199	851	67	[IQG1 - iqg1p, TMA19 - tma19p, TPM2 - tpm2p, SPC97 - spc97p, SPC110 - spc110p, MYO4 - myosin 4, BBP1 - bbp1p, SLA1 - sla1p, CMD1 - cmd1p, LSB3 - lsb3p, ABP1 - abp1p, ARP2 - actin-related protein 2, TUB1 - tub1p, PAN1 - pan1p, BIM1 - bim1p, NDC1 - ndc1p, BIK1 - bik1p, CBF2 - cbf2p, MPS3 - mps3p, RVS167 - rvs167p, MYO2 - myosin 2, BBC1 - bbc1p, ARC40 - arc40p, LAS17 - las17p, KCC4 - kcc4p, SCD5 - s…
GO:1990529	glycosylphosphatidylinositol-mannosyltransferase I complex	0.000126	0.00343	124.09	4095	2	33	2	[PBN1 - pbn1p, GPI14 - gpi14p]
GO:0031501	mannosyltransferase complex	0.000168	0.00445	22.29	4095	15	49	4	[PBN1 - pbn1p, PMT7 - pmt7p, PGA1 - pga1p, GPI14 - gpi14p]
GO:0005811	lipid droplet	0.000181	0.00467	2.54	4095	49	692	21	[YJU3 - yju3p, TDH2 - tdh2p, DGA1 - diacylglycerol o-acyltransferase, FAA1 - long-chain fatty acid-coa ligase faa1, SLC1 - 1-acylglycerol-3-phosphate o-acyltransferase slc1, ERG6 - sterol 24-c-methyltransferase, GPT2 - bifunctional glycerol-3-phosphate/glycerone-phosphate o-acyltransferase gpt2, FAA4 - long-chain fatty acid-coa ligase faa4, TGL3 - tgl3p, YIM1 - yim1p, ERG27 - 3-keto-steroid reduc…
GO:0043227	membrane-bounded organelle	0.000214	0.00537	1.16	4095	3256	143	132	[YLR194C - hypothetical protein, TFA2 - tfa2p, PHS1 - phs1p, SNL1 - snl1p, KRE1 - kre1p, GNP1 - gnp1p, YMR134W - hypothetical protein, EGT2 - egt2p, GPT2 - bifunctional glycerol-3-phosphate/glycerone-phosphate o-acyltransferase gpt2, ERJ5 - erj5p, PHO88 - pho88p, PBN1 - pbn1p, GLE2 - gle2p, YIP3 - yip3p, PHO86 - pho86p, PKR1 - pkr1p, NUP57 - nup57p, BRO1 - bro1p, POL30 - pol30p, UFE1 - ufe1p, AGP…
GO:0005798	Golgi-associated vesicle	0.000221	0.00541	3.45	4095	41	405	14	[NEO1 - putative aminophospholipid-translocating p4-type atpase neo1, ERV29 - erv29p, SLY1 - sly1p, GAP1 - gap1p, ERP3 - erp3p, EMP24 - emp24p, ERV25 - erv25p, ERV14 - erv14p, ERP4 - erp4p, RET2 - ret2p, YIP3 - yip3p, GAS1 - gas1p, ERP2 - erp2p, ERP1 - erp1p]
GO:0005816	spindle pole body	0.000238	0.0057	2.61	4095	64	515	21	[NDC1 - ndc1p, HRR25 - hrr25p, CIK1 - cik1p, BIK1 - bik1p, CBF2 - cbf2p, CDC15 - cdc15p, MPS3 - mps3p, MOB1 - mob1p, SPC29 - spc29p, CDC28 - cdc28p, BBP1 - bbp1p, KIN4 - kin4p, CMD1 - cmd1p, NKP2 - nkp2p, CRM1 - crm1p, TPD3 - tpd3p, GLC7 - glc7p, AME1 - ame1p, DBF2 - dbf2p, KAR3 - kar3p, BIM1 - bim1p]
GO:0005956	protein kinase CK2 complex	0.000254	0.00593	10.21	4095	4	401	4	[CKA1 - cka1p, CKA2 - cka2p, CKB2 - ckb2p, CKB1 - ckb1p]
GO:0005815	microtubule organizing center	0.000359	0.0082	2.07	4095	68	845	29	[HRR25 - hrr25p, CIK1 - cik1p, SPC97 - spc97p, SPC98 - spc98p, CDC15 - cdc15p, SPC110 - spc110p, SPC29 - spc29p, BBP1 - bbp1p, CMD1 - cmd1p, YRB2 - yrb2p, TUB1 - tub1p, KAR3 - kar3p, BIM1 - bim1p, CNM67 - cnm67p, NDC1 - ndc1p, BIK1 - bik1p, CBF2 - cbf2p, MPS3 - mps3p, MOB1 - mob1p, ARP1 - actin-related protein 1, CDC28 - cdc28p, KIN4 - kin4p, TUB3 - tub3p, CRM1 - crm1p, NKP2 - nkp2p, TPD3 - tpd3p…
GO:0043231	intracellular membrane-bounded organelle	0.000362	0.0081	1.14	4095	3199	213	189	[YLR194C - hypothetical protein, TFA2 - tfa2p, SNL1 - snl1p, PHS1 - phs1p, KRE1 - kre1p, GNP1 - gnp1p, URA5 - orotate phosphoribosyltransferase ura5, YMR134W - hypothetical protein, MRP10 - mitochondrial 37s ribosomal protein yms-t, EGT2 - egt2p, SLC1 - 1-acylglycerol-3-phosphate o-acyltransferase slc1, GPT2 - bifunctional glycerol-3-phosphate/glycerone-phosphate o-acyltransferase gpt2, ERJ5 - er…
GO:0043226	organelle	0.000402	0.0088	1.12	4095	3501	143	137	[YLR194C - hypothetical protein, TFA2 - tfa2p, PHS1 - phs1p, SNL1 - snl1p, KRE1 - kre1p, GNP1 - gnp1p, YMR134W - hypothetical protein, EGT2 - egt2p, GPT2 - bifunctional glycerol-3-phosphate/glycerone-phosphate o-acyltransferase gpt2, ERJ5 - erj5p, PHO88 - pho88p, PBN1 - pbn1p, GLE2 - gle2p, YIP3 - yip3p, PHO86 - pho86p, PKR1 - pkr1p, NUP57 - nup57p, BRO1 - bro1p, POL30 - pol30p, UFE1 - ufe1p, AGP…
GO:0034399	nuclear periphery	0.000737	0.0158	2.77	4095	58	434	17	[MDH2 - malate dehydrogenase mdh2, HMG1 - hydroxymethylglutaryl-coa reductase (nadph) hmg1, HSP104 - chaperone atpase hsp104, MPS3 - mps3p, MOB1 - mob1p, NSG1 - nsg1p, HMG2 - hydroxymethylglutaryl-coa reductase (nadph) hmg2, NMD5 - nmd5p, POM34 - pom34p, NVJ1 - nvj1p, NSP1 - nsp1p, PIR1 - pir1p, KAP95 - kap95p, MTR10 - mtr10p, GAS1 - gas1p, GTT3 - gtt3p, LAC1 - sphingosine n-acyltransferase lac1]
GO:0043229	intracellular organelle	0.000747	0.0157	1.12	4095	3500	143	137	[YLR194C - hypothetical protein, TFA2 - tfa2p, PHS1 - phs1p, SNL1 - snl1p, KRE1 - kre1p, GNP1 - gnp1p, YMR134W - hypothetical protein, EGT2 - egt2p, GPT2 - bifunctional glycerol-3-phosphate/glycerone-phosphate o-acyltransferase gpt2, ERJ5 - erj5p, PHO88 - pho88p, PBN1 - pbn1p, GLE2 - gle2p, YIP3 - yip3p, PHO86 - pho86p, PKR1 - pkr1p, NUP57 - nup57p, BRO1 - bro1p, POL30 - pol30p, UFE1 - ufe1p, AGP…
GO:0097038	perinuclear endoplasmic reticulum	0.000773	0.0159	50.56	4095	2	81	2	[DPL1 - sphinganine-1-phosphate aldolase dpl1, ICE2 - ice2p]
GO:0072546	ER membrane protein complex	0.000818	0.0165	5.35	4095	5	765	5	[EMC6 - emc6p, EMC2 - emc2p, EMC1 - emc1p, EMC5 - emc5p, EMC4 - emc4p]
GO:0042765	GPI-anchor transamidase complex	0.000844	0.0166	13.08	4095	3	313	3	[GPI8 - gpi8p, GPI17 - gpi17p, GAA1 - gaa1p]
GO:0005856	cytoskeleton	0.00089	0.0172	1.63	4095	149	913	54	[TMA19 - tma19p, TPM2 - tpm2p, SPC97 - spc97p, SPC110 - spc110p, BBP1 - bbp1p, SLA1 - sla1p, CMD1 - cmd1p, ABP1 - abp1p, TUB1 - tub1p, ARP2 - actin-related protein 2, PAN1 - pan1p, BIM1 - bim1p, NDC1 - ndc1p, BIK1 - bik1p, CBF2 - cbf2p, MPS3 - mps3p, RVS167 - rvs167p, BBC1 - bbc1p, ARC40 - arc40p, KCC4 - kcc4p, AIP1 - aip1p, SRV2 - srv2p, MYO3 - myosin 3, CIK1 - cik1p, CDC10 - septin cdc10, KIP3 …

## Sheet: Spc110C Process
GO Term	Description	P-value	FDR q-value	Enrichment	N	B	n	b	Genes
GO:0016072	rRNA metabolic process	1.63e-09	7.93e-06	2.93	4095	250	229	41	[RPS1B - ribosomal 40s subunit protein s1b, NSA2 - nsa2p, LAS1 - las1p, FAF1 - faf1p, FAL1 - fal1p, FCF2 - fcf2p, NIP7 - nip7p, RRP1 - rrp1p, RPL35B - ribosomal 60s subunit protein l35b, TIF6 - tif6p, TSR4 - tsr4p, RPA49 - rpa49p, RPS16A - ribosomal 40s subunit protein s16a, NOP56 - nop56p, GAR1 - gar1p, UTP14 - utp14p, MRPS18 - mitochondrial 37s ribosomal protein yms18, PRP5 - dead-box rna helic…
GO:0042254	ribosome biogenesis	6.83e-09	1.66e-05	3.53	4095	157	229	31	[NSA2 - nsa2p, FAF1 - faf1p, FAL1 - fal1p, FCF2 - fcf2p, NIP7 - nip7p, YDR161W - hypothetical protein, TIF6 - tif6p, RPA49 - rpa49p, NOP56 - nop56p, GAR1 - gar1p, UTP14 - utp14p, NUG1 - nug1p, RPA43 - rpa43p, RPA14 - rpa14p, KRI1 - kri1p, UTP21 - utp21p, RPA190 - rpa190p, NOP10 - nop10p, YTM1 - ytm1p, MRT4 - mrt4p, RCL1 - rcl1p, RIX7 - putative aaa family atpase rix7, RPL34B - ribosomal 60s subun…
GO:0034625	fatty acid elongation, monounsaturated fatty acid	2.2e-08	3.58e-05	455	4095	3	9	3	[ELO1 - elo1p, FEN1 - fatty acid elongase fen1, SUR4 - fatty acid elongase sur4]
GO:0034626	fatty acid elongation, polyunsaturated fatty acid	2.2e-08	2.68e-05	455	4095	3	9	3	[ELO1 - elo1p, FEN1 - fatty acid elongase fen1, SUR4 - fatty acid elongase sur4]
GO:0019367	fatty acid elongation, saturated fatty acid	2.2e-08	2.15e-05	455	4095	3	9	3	[ELO1 - elo1p, FEN1 - fatty acid elongase fen1, SUR4 - fatty acid elongase sur4]
GO:0019368	fatty acid elongation, unsaturated fatty acid	2.2e-08	1.79e-05	455	4095	3	9	3	[ELO1 - elo1p, FEN1 - fatty acid elongase fen1, SUR4 - fatty acid elongase sur4]
GO:0022613	ribonucleoprotein complex biogenesis	3.48e-08	2.42e-05	3.16	4095	182	235	33	[NSA2 - nsa2p, FAF1 - faf1p, RPL14A - ribosomal 60s subunit protein l14a, FAL1 - fal1p, FCF2 - fcf2p, NIP7 - nip7p, YDR161W - hypothetical protein, TIF6 - tif6p, AFG2 - aaa family atpase afg2, RPA49 - rpa49p, NOP56 - nop56p, GAR1 - gar1p, UTP14 - utp14p, NUG1 - nug1p, RPA43 - rpa43p, RPA14 - rpa14p, KRI1 - kri1p, UTP21 - utp21p, RPA190 - rpa190p, NOP10 - nop10p, YTM1 - ytm1p, RCL1 - rcl1p, MRT4 -…
GO:0006364	rRNA processing	3.68e-08	2.24e-05	2.94	4095	213	229	35	[NSA2 - nsa2p, RPS1B - ribosomal 40s subunit protein s1b, LAS1 - las1p, FAF1 - faf1p, FAL1 - fal1p, FCF2 - fcf2p, NIP7 - nip7p, RRP1 - rrp1p, RPL35B - ribosomal 60s subunit protein l35b, TIF6 - tif6p, TSR4 - tsr4p, RPS16A - ribosomal 40s subunit protein s16a, NOP56 - nop56p, GAR1 - gar1p, UTP14 - utp14p, MRPS18 - mitochondrial 37s ribosomal protein yms18, PRP5 - dead-box rna helicase prp5, NUG1 -…
GO:0015931	nucleobase-containing compound transport	1.25e-07	6.78e-05	1.81	4095	174	986	76	[RPS0B - ribosomal 40s subunit protein s0b, POM152 - pom152p, NMD3 - nmd3p, SHE3 - she3p, BCP1 - bcp1p, MLP2 - mlp2p, TEF1 - tef1p, MSN5 - msn5p, GLE2 - gle2p, NUG1 - nug1p, THP1 - thp1p, RLI1 - rli1p, POR1 - por1p, ARX1 - arx1p, SPT6 - spt6p, SNF7 - snf7p, NUP57 - nup57p, NUP157 - nup157p, ENP1 - enp1p, RIX7 - putative aaa family atpase rix7, SIS1 - sis1p, NDC1 - ndc1p, BRO1 - bro1p, YRA1 - yra1…
GO:0030497	fatty acid elongation	1.83e-07	8.94e-05	71.22	4095	5	46	4	[ELO1 - elo1p, FEN1 - fatty acid elongase fen1, SUR4 - fatty acid elongase sur4, IFA38 - ketoreductase]
GO:0070676	intralumenal vesicle formation	2.3e-07	0.000102	18.97	4095	7	185	6	[VPS20 - vps20p, BRO1 - bro1p, DID4 - did4p, VPS4 - aaa family atpase vps4, SNF7 - snf7p, DOA4 - doa4p]
GO:0051641	cellular localization	3.14e-07	0.000128	1.35	4095	698	986	227	[POM152 - pom152p, WSC4 - wsc4p, GPD1 - glycerol-3-phosphate dehydrogenase (nad(+)) gpd1, GLE2 - gle2p, SNA2 - sna2p, AGE1 - age1p, YIP3 - yip3p, PHO86 - pho86p, GRH1 - grh1p, NUP157 - nup157p, PBS2 - pbs2p, SIS1 - sis1p, LSB5 - lsb5p, TRS31 - trs31p, SEC10 - sec10p, RPB4 - rpb4p, OSH2 - osh2p, TIM18 - tim18p, NAB2 - nab2p, VPS60 - vps60p, GBP2 - gbp2p, SNA3 - sna3p, VPS4 - aaa family atpase vps4…
GO:0007059	chromosome segregation	3.42e-07	0.000128	5.51	4095	100	119	16	[NNF1 - nnf1p, SMC2 - condensin subunit smc2, STS1 - sts1p, SLI15 - sli15p, MCM21 - mcm21p, MIF2 - mif2p, KIP3 - tubulin-dependent atpase kip3, DAD4 - dad4p, DAD3 - dad3p, SPC24 - spc24p, NKP2 - nkp2p, OKP1 - okp1p, CSE4 - cse4p, DUO1 - duo1p, CDC55 - cdc55p, ASK1 - ask1p]
GO:0030148	sphingolipid biosynthetic process	3.73e-07	0.00013	18.86	4095	20	76	7	[ELO1 - elo1p, FEN1 - fatty acid elongase fen1, SUR4 - fatty acid elongase sur4, LAG1 - sphingosine n-acyltransferase lag1, SUR2 - sphingosine hydroxylase, LAC1 - sphingosine n-acyltransferase lac1, IFA38 - ketoreductase]
GO:0034660	ncRNA metabolic process	4.19e-07	0.000136	2.47	4095	392	169	40	[RPS1B - ribosomal 40s subunit protein s1b, NSA2 - nsa2p, LAS1 - las1p, BDF1 - bdf1p, FAL1 - fal1p, FCF2 - fcf2p, NIP7 - nip7p, TBF1 - tbf1p, RRP1 - rrp1p, RPL35B - ribosomal 60s subunit protein l35b, TIF6 - tif6p, TSR4 - tsr4p, RPA49 - rpa49p, URM1 - ubiquitin-related modifier urm1, RPS16A - ribosomal 40s subunit protein s16a, GAR1 - gar1p, UTP14 - utp14p, MRPS18 - mitochondrial 37s ribosomal pr…
GO:0042761	very long-chain fatty acid biosynthetic process	5.58e-07	0.00017	227.5	4095	6	9	3	[ELO1 - elo1p, FEN1 - fatty acid elongase fen1, SUR4 - fatty acid elongase sur4]
GO:0044085	cellular component biogenesis	6.74e-07	0.000193	2.64	4095	231	235	35	[NSA2 - nsa2p, FAF1 - faf1p, RPL14A - ribosomal 60s subunit protein l14a, FAL1 - fal1p, TIM21 - tim21p, FCF2 - fcf2p, NIP7 - nip7p, YDR161W - hypothetical protein, TIF6 - tif6p, AFG2 - aaa family atpase afg2, RPA49 - rpa49p, GAR1 - gar1p, NOP56 - nop56p, UTP14 - utp14p, NUG1 - nug1p, RPA14 - rpa14p, RPA43 - rpa43p, KRI1 - kri1p, RPA190 - rpa190p, UTP21 - utp21p, NOP10 - nop10p, YTM1 - ytm1p, RCL1…
GO:0046467	membrane lipid biosynthetic process	8.18e-07	0.000221	11.28	4095	43	76	9	[GPI11 - gpi11p, ELO1 - elo1p, FEN1 - fatty acid elongase fen1, SUR4 - fatty acid elongase sur4, GPI17 - gpi17p, LAG1 - sphingosine n-acyltransferase lag1, SUR2 - sphingosine hydroxylase, IFA38 - ketoreductase, LAC1 - sphingosine n-acyltransferase lac1]
GO:0050657	nucleic acid transport	8.34e-07	0.000214	1.84	4095	147	986	65	[RPS0B - ribosomal 40s subunit protein s0b, POM152 - pom152p, NMD3 - nmd3p, SHE3 - she3p, BCP1 - bcp1p, MLP2 - mlp2p, TEF1 - tef1p, MSN5 - msn5p, GLE2 - gle2p, NUG1 - nug1p, THP1 - thp1p, RLI1 - rli1p, POR1 - por1p, ARX1 - arx1p, SPT6 - spt6p, NUP57 - nup57p, NUP157 - nup157p, ENP1 - enp1p, RIX7 - putative aaa family atpase rix7, SIS1 - sis1p, NDC1 - ndc1p, YRA1 - yra1p, RNA1 - rna1p, NOG1 - nog1…
GO:0006643	membrane lipid metabolic process	9.43e-07	0.00023	9.45	4095	57	76	10	[GPI11 - gpi11p, ELO1 - elo1p, FEN1 - fatty acid elongase fen1, SUR4 - fatty acid elongase sur4, GPI17 - gpi17p, LAG1 - sphingosine n-acyltransferase lag1, SUR2 - sphingosine hydroxylase, DPL1 - sphinganine-1-phosphate aldolase dpl1, IFA38 - ketoreductase, LAC1 - sphingosine n-acyltransferase lac1]
GO:0000038	very long-chain fatty acid metabolic process	1.11e-06	0.000257	195	4095	7	9	3	[ELO1 - elo1p, FEN1 - fatty acid elongase fen1, SUR4 - fatty acid elongase sur4]
GO:0006665	sphingolipid metabolic process	1.16e-06	0.000257	13.06	4095	33	76	8	[ELO1 - elo1p, FEN1 - fatty acid elongase fen1, SUR4 - fatty acid elongase sur4, LAG1 - sphingosine n-acyltransferase lag1, SUR2 - sphingosine hydroxylase, DPL1 - sphinganine-1-phosphate aldolase dpl1, IFA38 - ketoreductase, LAC1 - sphingosine n-acyltransferase lac1]
GO:0008608	attachment of spindle microtubules to kinetochore	1.21e-06	0.000257	6.32	4095	30	259	12	[NUF2 - nuf2p, MIF2 - mif2p, DAD4 - dad4p, OKP1 - okp1p, AME1 - ame1p, DUO1 - duo1p, DAD3 - dad3p, CTF19 - ctf19p, ASK1 - ask1p, IRC15 - irc15p, DAD2 - dad2p, IPL1 - ipl1p]
GO:0050658	RNA transport	1.24e-06	0.000253	1.83	4095	145	986	64	[RPS0B - ribosomal 40s subunit protein s0b, POM152 - pom152p, NMD3 - nmd3p, SHE3 - she3p, BCP1 - bcp1p, MLP2 - mlp2p, TEF1 - tef1p, MSN5 - msn5p, GLE2 - gle2p, NUG1 - nug1p, THP1 - thp1p, RLI1 - rli1p, ARX1 - arx1p, SPT6 - spt6p, NUP57 - nup57p, NUP157 - nup157p, ENP1 - enp1p, RIX7 - putative aaa family atpase rix7, SIS1 - sis1p, NDC1 - ndc1p, YRA1 - yra1p, RNA1 - rna1p, NOG1 - nog1p, SSA2 - hsp7…
GO:0051236	establishment of RNA localization	1.24e-06	0.000243	1.83	4095	145	986	64	[RPS0B - ribosomal 40s subunit protein s0b, POM152 - pom152p, NMD3 - nmd3p, SHE3 - she3p, BCP1 - bcp1p, MLP2 - mlp2p, TEF1 - tef1p, MSN5 - msn5p, GLE2 - gle2p, NUG1 - nug1p, THP1 - thp1p, RLI1 - rli1p, ARX1 - arx1p, SPT6 - spt6p, NUP57 - nup57p, NUP157 - nup157p, ENP1 - enp1p, RIX7 - putative aaa family atpase rix7, SIS1 - sis1p, NDC1 - ndc1p, YRA1 - yra1p, RNA1 - rna1p, NOG1 - nog1p, SSA2 - hsp7…
GO:0043933	macromolecular complex subunit organization	1.83e-06	0.000344	1.74	4095	509	375	81	[SUI2 - sui2p, PIM1 - pim1p, SNL1 - snl1p, MCM2 - mcm2p, RPL24A - ribosomal 60s subunit protein l24a, SNF5 - snf5p, SEC65 - sec65p, RTN1 - rtn1p, PGD1 - pgd1p, SLU7 - slu7p, RSC8 - rsc8p, MRF1 - mrf1p, NUF2 - nuf2p, MRPS18 - mitochondrial 37s ribosomal protein yms18, RSC58 - rsc58p, PRP5 - dead-box rna helicase prp5, SPT6 - spt6p, PKR1 - pkr1p, REX4 - rex4p, NUP57 - nup57p, MED2 - med2p, RAD52 - …
GO:0006913	nucleocytoplasmic transport	7.55e-06	0.00136	1.87	4095	118	986	53	[RPS0B - ribosomal 40s subunit protein s0b, POM152 - pom152p, BCP1 - bcp1p, SRP1 - srp1p, MLP2 - mlp2p, NMD5 - nmd5p, KAP122 - kap122p, TEF1 - tef1p, REI1 - rei1p, MSN5 - msn5p, GLE2 - gle2p, THP1 - thp1p, SPT6 - spt6p, NUP57 - nup57p, NUP157 - nup157p, ENP1 - enp1p, PBS2 - pbs2p, SIS1 - sis1p, NDC1 - ndc1p, YRA1 - yra1p, RNA1 - rna1p, SSA2 - hsp70 family chaperone ssa2, RPB4 - rpb4p, NAB2 - nab2…
GO:0051315	attachment of mitotic spindle microtubules to kinetochore	8.46e-06	0.00147	8.43	4095	15	259	8	[NUF2 - nuf2p, MIF2 - mif2p, DAD4 - dad4p, DUO1 - duo1p, DAD3 - dad3p, ASK1 - ask1p, IRC15 - irc15p, DAD2 - dad2p]
GO:0051649	establishment of localization in cell	1.02e-05	0.00172	1.37	4095	505	986	167	[ARL3 - arl3p, NMD3 - nmd3p, WSC4 - wsc4p, SEC65 - sec65p, STI1 - sti1p, NMD5 - nmd5p, VPS9 - vps9p, DRS2 - aminophospholipid-translocating p4-type atpase drs2, PHO88 - pho88p, GPD1 - glycerol-3-phosphate dehydrogenase (nad(+)) gpd1, GLE2 - gle2p, SNA2 - sna2p, AGE1 - age1p, YIP3 - yip3p, VPS15 - vps15p, SPT6 - spt6p, PHO86 - pho86p, SVP26 - svp26p, GRH1 - grh1p, VID24 - glucose-induced degradati…
GO:0071840	cellular component organization or biogenesis	1.09e-05	0.00176	1.32	4095	1557	371	186	[NSA2 - nsa2p, FAF1 - faf1p, LAS1 - las1p, SNL1 - snl1p, SMC2 - condensin subunit smc2, WSC4 - wsc4p, SEC65 - sec65p, RTN1 - rtn1p, RFA2 - rfa2p, RSC8 - rsc8p, MRF1 - mrf1p, NOP56 - nop56p, UTP14 - utp14p, GPD1 - glycerol-3-phosphate dehydrogenase (nad(+)) gpd1, MRPS18 - mitochondrial 37s ribosomal protein yms18, KOG1 - kog1p, GLE2 - gle2p, RPA43 - rpa43p, SPC24 - spc24p, KRI1 - kri1p, SPT6 - spt…
GO:0006997	nucleus organization	1.14e-05	0.00179	2.71	4095	33	963	21	[POM152 - pom152p, NUP85 - nup85p, NDC1 - ndc1p, SNL1 - snl1p, NUP159 - nup159p, RTN1 - rtn1p, NET1 - net1p, NUP192 - nup192p, POM33 - pom33p, NUP84 - nup84p, NUP53 - nup53p, PER33 - per33p, NUP116 - nup116p, TOM1 - e3 ubiquitin-protein ligase tom1, GLE2 - gle2p, SYH1 - syh1p, NUP145 - nup145p, YOP1 - yop1p, NUP57 - nup57p, NUP157 - nup157p, NUP133 - nup133p]
GO:0031113	regulation of microtubule polymerization	1.45e-05	0.0022	20.81	4095	12	82	5	[KIP3 - tubulin-dependent atpase kip3, DAD4 - dad4p, DUO1 - duo1p, DAD3 - dad3p, ASK1 - ask1p]
GO:0051170	nuclear import	1.55e-05	0.00229	2.33	4095	51	963	28	[POM152 - pom152p, SRP1 - srp1p, NMD5 - nmd5p, KAP122 - kap122p, KAP120 - kap120p, NUP84 - nup84p, GLE2 - gle2p, NUP145 - nup145p, RTG2 - rtg2p, NUP57 - nup57p, NUP157 - nup157p, PBS2 - pbs2p, SIS1 - sis1p, NUP85 - nup85p, NUP159 - nup159p, RNA1 - rna1p, SSA2 - hsp70 family chaperone ssa2, SXM1 - sxm1p, NUP49 - nup49p, NUP53 - nup53p, NUP116 - nup116p, YDJ1 - ydj1p, CSE1 - cse1p, KAP114 - kap114p…
GO:0046907	intracellular transport	1.6e-05	0.00229	1.37	4095	487	986	161	[ARL3 - arl3p, NMD3 - nmd3p, WSC4 - wsc4p, SEC65 - sec65p, STI1 - sti1p, NMD5 - nmd5p, VPS9 - vps9p, DRS2 - aminophospholipid-translocating p4-type atpase drs2, PHO88 - pho88p, GPD1 - glycerol-3-phosphate dehydrogenase (nad(+)) gpd1, GLE2 - gle2p, SNA2 - sna2p, AGE1 - age1p, YIP3 - yip3p, VPS15 - vps15p, SPT6 - spt6p, PHO86 - pho86p, SVP26 - svp26p, GRH1 - grh1p, VID24 - glucose-induced degradati…
GO:0034470	ncRNA processing	1.93e-05	0.00269	2.45	4095	306	169	31	[NSA2 - nsa2p, RPS1B - ribosomal 40s subunit protein s1b, LAS1 - las1p, FAL1 - fal1p, FCF2 - fcf2p, NIP7 - nip7p, RRP1 - rrp1p, RPL35B - ribosomal 60s subunit protein l35b, TIF6 - tif6p, TSR4 - tsr4p, RPS16A - ribosomal 40s subunit protein s16a, URM1 - ubiquitin-related modifier urm1, GAR1 - gar1p, UTP14 - utp14p, MRPS18 - mitochondrial 37s ribosomal protein yms18, PRP5 - dead-box rna helicase pr…
GO:0071824	protein-DNA complex subunit organization	2.96e-05	0.004	2.53	4095	132	355	29	[MCM2 - mcm2p, SNF5 - snf5p, PGD1 - pgd1p, POB3 - pob3p, ROX3 - rox3p, TAF14 - taf14p, RSC8 - rsc8p, RSC58 - rsc58p, CDC6 - aaa family atpase cdc6, CSE2 - cse2p, YAF9 - yaf9p, SPT6 - spt6p, SIN4 - sin4p, TAF12 - taf12p, MED2 - med2p, RAD52 - recombinase rad52, MCM21 - mcm21p, RVB1 - ruvb family atp-dependent dna helicase pontin, TFG1 - tfg1p, SPT15 - spt15p, FPR4 - peptidylprolyl isomerase fpr4, …
GO:0000463	maturation of LSU-rRNA from tricistronic rRNA transcript (SSU-rRNA, 5.8S rRNA, LSU-rRNA)	3.24e-05	0.00427	10.15	4095	25	113	7	[NSA2 - nsa2p, NOP12 - nop12p, NUG1 - nug1p, NIP7 - nip7p, RPL35B - ribosomal 60s subunit protein l35b, NOP8 - nop8p, TIF6 - tif6p]
GO:0031110	regulation of microtubule polymerization or depolymerization	3.56e-05	0.00457	17.84	4095	14	82	5	[KIP3 - tubulin-dependent atpase kip3, DAD4 - dad4p, DUO1 - duo1p, DAD3 - dad3p, ASK1 - ask1p]
GO:0006629	lipid metabolic process	4.55e-05	0.00569	3.64	4095	237	76	16	[FEN1 - fatty acid elongase fen1, GPI17 - gpi17p, SUR4 - fatty acid elongase sur4, LAG1 - sphingosine n-acyltransferase lag1, HMG1 - hydroxymethylglutaryl-coa reductase (nadph) hmg1, ALG6 - dolichyl-p-glc:man(9)glcnac(2)-pp-dolichol alpha-1,3-glucosyltransferase, SUR2 - sphingosine hydroxylase, DPL1 - sphinganine-1-phosphate aldolase dpl1, ALG13 - n-acetylglucosaminyldiphosphodolichol n-acetylglu…
GO:0000478	endonucleolytic cleavage involved in rRNA processing	4.84e-05	0.0059	2.45	4095	41	937	23	[RPS0B - ribosomal 40s subunit protein s0b, RPS27B - ribosomal 40s subunit protein s27b, LAS1 - las1p, FCF2 - fcf2p, NOP19 - nop19p, KRR1 - krr1p, UTP23 - utp23p, UTP18 - utp18p, RPL37B - ribosomal 60s subunit protein l37b, UTP14 - utp14p, UTP10 - utp10p, RPS0A - ribosomal 40s subunit protein s0a, TOM1 - e3 ubiquitin-protein ligase tom1, RAT1 - rat1p, NOP9 - nop9p, BUD21 - bud21p, BUD23 - bud23p,…
GO:0000479	endonucleolytic cleavage of tricistronic rRNA transcript (SSU-rRNA, 5.8S rRNA, LSU-rRNA)	4.84e-05	0.00575	2.45	4095	41	937	23	[RPS27B - ribosomal 40s subunit protein s27b, RPS0B - ribosomal 40s subunit protein s0b, LAS1 - las1p, FCF2 - fcf2p, NOP19 - nop19p, KRR1 - krr1p, UTP23 - utp23p, UTP18 - utp18p, RPL37B - ribosomal 60s subunit protein l37b, UTP10 - utp10p, UTP14 - utp14p, RPS0A - ribosomal 40s subunit protein s0a, TOM1 - e3 ubiquitin-protein ligase tom1, RAT1 - rat1p, NOP9 - nop9p, BUD21 - bud21p, BUD23 - bud23p,…
GO:0000447	endonucleolytic cleavage in ITS1 to separate SSU-rRNA from 5.8S rRNA and LSU-rRNA from tricistronic rRNA transcript (SSU-rRNA, 5.8S rRNA, LSU-rRNA)	5.07e-05	0.00588	2.68	4095	31	937	19	[RPS0B - ribosomal 40s subunit protein s0b, FCF2 - fcf2p, KRR1 - krr1p, NOP19 - nop19p, UTP23 - utp23p, UTP18 - utp18p, UTP10 - utp10p, UTP14 - utp14p, RPS0A - ribosomal 40s subunit protein s0a, TOM1 - e3 ubiquitin-protein ligase tom1, NOP9 - nop9p, BUD21 - bud21p, BUD23 - bud23p, KRI1 - kri1p, UTP6 - utp6p, UTP20 - utp20p, ENP1 - enp1p, NOP58 - nop58p, RCL1 - rcl1p]
GO:0051987	positive regulation of attachment of spindle microtubules to kinetochore	5.24e-05	0.00594	13.69	4095	8	187	5	[DAD4 - dad4p, DAD3 - dad3p, DUO1 - duo1p, ASK1 - ask1p, DAD2 - dad2p]
GO:0000470	maturation of LSU-rRNA	5.86e-05	0.00649	7.84	4095	37	113	8	[NSA2 - nsa2p, NOP12 - nop12p, LAS1 - las1p, NUG1 - nug1p, NIP7 - nip7p, RPL35B - ribosomal 60s subunit protein l35b, NOP8 - nop8p, TIF6 - tif6p]
GO:0006633	fatty acid biosynthetic process	8.12e-05	0.0088	65	4095	21	9	3	[ELO1 - elo1p, FEN1 - fatty acid elongase fen1, SUR4 - fatty acid elongase sur4]
GO:0044255	cellular lipid metabolic process	8.86e-05	0.00939	3.67	4095	220	76	15	[FEN1 - fatty acid elongase fen1, GPI17 - gpi17p, SUR4 - fatty acid elongase sur4, LAG1 - sphingosine n-acyltransferase lag1, HMG1 - hydroxymethylglutaryl-coa reductase (nadph) hmg1, ALG6 - dolichyl-p-glc:man(9)glcnac(2)-pp-dolichol alpha-1,3-glucosyltransferase, SUR2 - sphingosine hydroxylase, DPL1 - sphinganine-1-phosphate aldolase dpl1, ALG13 - n-acetylglucosaminyldiphosphodolichol n-acetylglu…
GO:0045324	late endosome to vacuole transport	8.95e-05	0.00928	17.43	4095	47	25	5	[FEN1 - fatty acid elongase fen1, SUR4 - fatty acid elongase sur4, DID4 - did4p, VPS4 - aaa family atpase vps4, SNF7 - snf7p]
GO:0051983	regulation of chromosome segregation	9.27e-05	0.00941	3.71	4095	65	255	15	[BMH1 - bmh1p, KIP3 - tubulin-dependent atpase kip3, APC11 - anaphase promoting complex subunit 11, DAD4 - dad4p, MLP2 - mlp2p, DAD3 - dad3p, CTF19 - ctf19p, IPL1 - ipl1p, CEP3 - cep3p, KIN4 - kin4p, TPD3 - tpd3p, DUO1 - duo1p, CDC55 - cdc55p, ASK1 - ask1p, DAD2 - dad2p]
GO:1990758	mitotic sister chromatid biorientation	0.000103	0.0103	22.2	4095	9	82	4	[DAD4 - dad4p, DAD3 - dad3p, DUO1 - duo1p, ASK1 - ask1p]
GO:0051988	regulation of attachment of spindle microtubules to kinetochore	0.000103	0.01	22.2	4095	9	82	4	[DAD4 - dad4p, DUO1 - duo1p, DAD3 - dad3p, ASK1 - ask1p]
GO:0098781	ncRNA transcription	0.000107	0.0102	4.4	4095	45	248	12	[RPC37 - rpc37p, BDF1 - bdf1p, RET1 - ret1p, RPA14 - rpa14p, RPA43 - rpa43p, RPC17 - rpc17p, RPA34 - rpa34p, TBF1 - tbf1p, RPA190 - rpa190p, SPT15 - spt15p, RPC53 - rpc53p, RPA49 - rpa49p]
GO:0051179	localization	0.000116	0.0109	1.2	4095	1116	982	322	[YGL140C - hypothetical protein, POM152 - pom152p, WSC4 - wsc4p, SEC20 - sec20p, TIP20 - tip20p, MUP3 - mup3p, VTS1 - vts1p, COX5A - cytochrome c oxidase subunit va, GPD1 - glycerol-3-phosphate dehydrogenase (nad(+)) gpd1, MRS2 - mrs2p, GLE2 - gle2p, VMA4 - vma4p, SNA2 - sna2p, POR1 - por1p, AGE1 - age1p, YIP3 - yip3p, PHO86 - pho86p, YRB30 - yrb30p, GRH1 - grh1p, NUP157 - nup157p, ALB1 - alb1p, …
GO:0051984	positive regulation of chromosome segregation	0.000138	0.0127	9.39	4095	14	187	6	[APC11 - anaphase promoting complex subunit 11, DAD4 - dad4p, DUO1 - duo1p, DAD3 - dad3p, ASK1 - ask1p, DAD2 - dad2p]
GO:0008610	lipid biosynthetic process	0.000149	0.0135	4.55	4095	142	76	12	[GPI11 - gpi11p, ELO1 - elo1p, FEN1 - fatty acid elongase fen1, SUR4 - fatty acid elongase sur4, GPI17 - gpi17p, LAG1 - sphingosine n-acyltransferase lag1, HMG1 - hydroxymethylglutaryl-coa reductase (nadph) hmg1, SUR2 - sphingosine hydroxylase, ERG25 - methylsterol monooxygenase, HMG2 - hydroxymethylglutaryl-coa reductase (nadph) hmg2, IFA38 - ketoreductase, LAC1 - sphingosine n-acyltransferase l…
GO:0006352	DNA-templated transcription, initiation	0.000156	0.0139	14.62	4095	25	56	5	[RPC17 - rpc17p, TAF14 - taf14p, SPT15 - spt15p, TFG1 - tfg1p, TAF12 - taf12p]
GO:0031116	positive regulation of microtubule polymerization	0.000175	0.0152	19.98	4095	10	82	4	[DAD4 - dad4p, DAD3 - dad3p, DUO1 - duo1p, ASK1 - ask1p]
GO:0031112	positive regulation of microtubule polymerization or depolymerization	0.000175	0.0149	19.98	4095	10	82	4	[DAD4 - dad4p, DUO1 - duo1p, DAD3 - dad3p, ASK1 - ask1p]
GO:0016255	attachment of GPI anchor to protein	0.000177	0.0149	22.02	4095	3	186	3	[GPI8 - gpi8p, GPI17 - gpi17p, GAA1 - gaa1p]
GO:0006606	protein import into nucleus	0.000182	0.015	2.21	4095	48	963	25	[POM152 - pom152p, SRP1 - srp1p, NMD5 - nmd5p, KAP122 - kap122p, KAP120 - kap120p, NUP84 - nup84p, GLE2 - gle2p, NUP145 - nup145p, RTG2 - rtg2p, NUP57 - nup57p, NUP157 - nup157p, PBS2 - pbs2p, NUP85 - nup85p, NUP159 - nup159p, RNA1 - rna1p, SXM1 - sxm1p, NUP49 - nup49p, NUP53 - nup53p, NUP116 - nup116p, CSE1 - cse1p, KAP114 - kap114p, MTR2 - mtr2p, MTR10 - mtr10p, NUP133 - nup133p, NUP1 - nup1p]
GO:0065005	protein-lipid complex assembly	0.000193	0.0156	21.44	4095	3	191	3	[VPS1 - vps1p, RVS167 - rvs167p, RVS161 - rvs161p]
GO:0060988	lipid tube assembly	0.000193	0.0154	21.44	4095	3	191	3	[VPS1 - vps1p, RVS167 - rvs167p, RVS161 - rvs161p]
GO:0098789	pre-mRNA cleavage required for polyadenylation	0.000197	0.0155	4.74	4095	11	628	8	[MPE1 - mpe1p, CFT2 - cft2p, HRP1 - hrp1p, PTI1 - pti1p, PTA1 - pta1p, YTH1 - yth1p, CFT1 - cft1p, PFS2 - pfs2p]
GO:0098787	mRNA cleavage involved in mRNA processing	0.000197	0.0152	4.74	4095	11	628	8	[MPE1 - mpe1p, CFT2 - cft2p, HRP1 - hrp1p, PTI1 - pti1p, PTA1 - pta1p, YTH1 - yth1p, CFT1 - cft1p, PFS2 - pfs2p]
GO:0051640	organelle localization	0.000199	0.0151	1.67	4095	143	979	57	[NMD3 - nmd3p, BCP1 - bcp1p, MLP2 - mlp2p, NUG1 - nug1p, RLI1 - rli1p, ARX1 - arx1p, SMY1 - smy1p, BIM1 - bim1p, RIX7 - putative aaa family atpase rix7, SEC21 - sec21p, SIR3 - sir3p, RNA1 - rna1p, NOG1 - nog1p, SEC10 - sec10p, NOP9 - nop9p, SEC18 - sec18p, CRM1 - crm1p, RET2 - ret2p, NUP133 - nup133p, KIP3 - tubulin-dependent atpase kip3, VAM7 - vam7p, TIF6 - tif6p, VPS33 - vps33p, NUP84 - nup84p…
GO:0006404	RNA import into nucleus	0.0002	0.015	7.12	4095	5	575	5	[SIS1 - sis1p, YDJ1 - ydj1p, RNA1 - rna1p, MTR10 - mtr10p, SSA2 - hsp70 family chaperone ssa2]
GO:0006900	vesicle budding from membrane	0.000202	0.0149	8.85	4095	15	185	6	[VPS20 - vps20p, BRO1 - bro1p, DID4 - did4p, VPS4 - aaa family atpase vps4, SNF7 - snf7p, DOA4 - doa4p]
GO:0071705	nitrogen compound transport	0.00021	0.0152	1.28	4095	623	994	194	[POM152 - pom152p, WSC4 - wsc4p, SEC20 - sec20p, MUP3 - mup3p, TIP20 - tip20p, VTS1 - vts1p, GPD1 - glycerol-3-phosphate dehydrogenase (nad(+)) gpd1, GLE2 - gle2p, POR1 - por1p, AGE1 - age1p, YRB30 - yrb30p, NUP157 - nup157p, GRH1 - grh1p, PBS2 - pbs2p, SIS1 - sis1p, PTR2 - ptr2p, AGP1 - agp1p, SEC10 - sec10p, RPB4 - rpb4p, OSH2 - osh2p, TIM18 - tim18p, NAB2 - nab2p, VPS60 - vps60p, GBP2 - gbp2p,…
GO:0051123	RNA polymerase II transcriptional preinitiation complex assembly	0.00021	0.015	3.95	4095	35	355	12	[MED2 - med2p, SRB2 - srb2p, CSE2 - cse2p, PGD1 - pgd1p, ROX3 - rox3p, GAL11 - gal11p, TAF14 - taf14p, SIN4 - sin4p, TFG1 - tfg1p, SPT15 - spt15p, MED6 - med6p, TAF12 - taf12p]
GO:0008104	protein localization	0.000215	0.0152	1.48	4095	581	451	95	[YPT7 - ypt7p, ARL3 - arl3p, WSC4 - wsc4p, SEC65 - sec65p, SRP1 - srp1p, RFA2 - rfa2p, SPC1 - spc1p, TIP20 - tip20p, NMD5 - nmd5p, VTS1 - vts1p, TID3 - tid3p, BBP1 - bbp1p, PHO88 - pho88p, GPD1 - glycerol-3-phosphate dehydrogenase (nad(+)) gpd1, MSN5 - msn5p, NUG1 - nug1p, GLE2 - gle2p, GPI8 - gpi8p, AGE1 - age1p, VPS15 - vps15p, SNF7 - snf7p, SEC31 - sec31p, YRB30 - yrb30p, NUP57 - nup57p, VID24…
GO:0051028	mRNA transport	0.000291	0.0203	1.83	4095	91	986	40	[POM152 - pom152p, SHE3 - she3p, YRA2 - yra2p, MLP2 - mlp2p, NUP192 - nup192p, SHE2 - she2p, NUP84 - nup84p, TOM1 - e3 ubiquitin-protein ligase tom1, GLE2 - gle2p, THP1 - thp1p, NUP145 - nup145p, SPT6 - spt6p, NUP57 - nup57p, ENP1 - enp1p, NUP157 - nup157p, NEW1 - new1p, SRM1 - srm1p, NUP85 - nup85p, NDC1 - ndc1p, YRA1 - yra1p, NUP159 - nup159p, SXM1 - sxm1p, SUB2 - sub2p, NUP49 - nup49p, RPB4 - …
GO:0051031	tRNA transport	0.00034	0.0233	3.62	4095	20	623	11	[MSN5 - msn5p, YDJ1 - ydj1p, SIS1 - sis1p, NUP145 - nup145p, RNA1 - rna1p, MTR10 - mtr10p, SSA2 - hsp70 family chaperone ssa2, CEX1 - cex1p, NUP49 - nup49p, TEF1 - tef1p, NUP133 - nup133p]
GO:0034622	cellular macromolecular complex assembly	0.000344	0.0233	1.65	4095	403	375	61	[SUI2 - sui2p, PIM1 - pim1p, RPL24A - ribosomal 60s subunit protein l24a, MCM2 - mcm2p, SEC65 - sec65p, RTN1 - rtn1p, PGD1 - pgd1p, SLU7 - slu7p, MRPS18 - mitochondrial 37s ribosomal protein yms18, PRP5 - dead-box rna helicase prp5, SPT6 - spt6p, PKR1 - pkr1p, REX4 - rex4p, MED2 - med2p, RAD52 - recombinase rad52, CBF2 - cbf2p, RRP7 - rrp7p, RVS167 - rvs167p, FPR4 - peptidylprolyl isomerase fpr4,…
GO:0034504	protein localization to nucleus	0.000357	0.0239	3.45	4095	56	297	14	[STS1 - sts1p, SRP1 - srp1p, SXM1 - sxm1p, NUP49 - nup49p, KAP120 - kap120p, NUP84 - nup84p, GLE2 - gle2p, CSE1 - cse1p, NUP145 - nup145p, MTR10 - mtr10p, MTR2 - mtr2p, ICE2 - ice2p, NUP57 - nup57p, NUP1 - nup1p]
GO:0031334	positive regulation of protein complex assembly	0.000388	0.0255	2.29	4095	45	875	22	[RHO5 - rho5p, MYO3 - myosin 3, ARC18 - arc18p, POB3 - pob3p, DAD4 - dad4p, RPT5 - proteasome regulatory particle base subunit rpt5, SLY1 - sly1p, DAD3 - dad3p, ARC40 - arc40p, LAS17 - las17p, XRN1 - xrn1p, DCP2 - dcp2p, DAD1 - dad1p, ARC35 - arc35p, VPS45 - vps45p, DUO1 - duo1p, ARC15 - arc15p, ASK1 - ask1p, BZZ1 - bzz1p, DAD2 - dad2p, BIM1 - bim1p, VTA1 - vta1p]
GO:0032273	positive regulation of protein polymerization	0.000417	0.0271	2.75	4095	26	859	15	[MYO3 - myosin 3, RHO5 - rho5p, ARC18 - arc18p, DAD4 - dad4p, DAD3 - dad3p, LAS17 - las17p, ARC40 - arc40p, DAD1 - dad1p, ARC35 - arc35p, ARC15 - arc15p, DUO1 - duo1p, ASK1 - ask1p, BZZ1 - bzz1p, DAD2 - dad2p, BIM1 - bim1p]
GO:0065004	protein-DNA complex assembly	0.000428	0.0274	2.87	4095	85	302	18	[MED2 - med2p, RAD52 - recombinase rad52, MCM2 - mcm2p, MCM21 - mcm21p, ROX3 - rox3p, TAF14 - taf14p, TFG1 - tfg1p, SPT15 - spt15p, FPR4 - peptidylprolyl isomerase fpr4, MED6 - med6p, SRB2 - srb2p, CDC6 - aaa family atpase cdc6, CSE2 - cse2p, CSE4 - cse4p, SPT6 - spt6p, GAL11 - gal11p, SIN4 - sin4p, TAF12 - taf12p]
GO:0065003	macromolecular complex assembly	0.000472	0.0298	1.63	4095	416	375	62	[SUI2 - sui2p, PIM1 - pim1p, RPL24A - ribosomal 60s subunit protein l24a, MCM2 - mcm2p, RTN1 - rtn1p, SEC65 - sec65p, PGD1 - pgd1p, SLU7 - slu7p, MRPS18 - mitochondrial 37s ribosomal protein yms18, PRP5 - dead-box rna helicase prp5, SPT6 - spt6p, PKR1 - pkr1p, REX4 - rex4p, MED2 - med2p, RAD52 - recombinase rad52, CBF2 - cbf2p, RRP7 - rrp7p, RVS167 - rvs167p, FPR4 - peptidylprolyl isomerase fpr4,…
GO:0007032	endosome organization	0.000487	0.0304	7.81	4095	17	185	6	[VPS20 - vps20p, BRO1 - bro1p, DID4 - did4p, VPS4 - aaa family atpase vps4, SNF7 - snf7p, DOA4 - doa4p]
GO:0043162	ubiquitin-dependent protein catabolic process via the multivesicular body sorting pathway	0.000512	0.0316	6.52	4095	10	377	6	[VPS20 - vps20p, VPS28 - vps28p, DID4 - did4p, UBP2 - ubp2p, SNF7 - snf7p, DOA4 - doa4p]
GO:0051168	nuclear export	0.00053	0.0323	2.1	4095	86	659	29	[BCP1 - bcp1p, YRA2 - yra2p, MLP2 - mlp2p, TEF1 - tef1p, NUP84 - nup84p, MSN5 - msn5p, THP1 - thp1p, GLE2 - gle2p, NUP145 - nup145p, SPT6 - spt6p, NUP157 - nup157p, ENP1 - enp1p, NEW1 - new1p, YRA1 - yra1p, NUP159 - nup159p, RNA1 - rna1p, SXM1 - sxm1p, RPB4 - rpb4p, CEX1 - cex1p, NUP49 - nup49p, RPS0A - ribosomal 40s subunit protein s0a, CSE1 - cse1p, GBP2 - gbp2p, CRM1 - crm1p, MTR2 - mtr2p, RPS…
GO:0033036	macromolecule localization	0.000554	0.0333	1.45	4095	602	451	96	[YPT7 - ypt7p, ARL3 - arl3p, WSC4 - wsc4p, SEC65 - sec65p, SRP1 - srp1p, RFA2 - rfa2p, SPC1 - spc1p, TIP20 - tip20p, NMD5 - nmd5p, VTS1 - vts1p, TID3 - tid3p, BBP1 - bbp1p, PHO88 - pho88p, GPD1 - glycerol-3-phosphate dehydrogenase (nad(+)) gpd1, MSN5 - msn5p, NUG1 - nug1p, GLE2 - gle2p, GPI8 - gpi8p, AGE1 - age1p, VPS15 - vps15p, SNF7 - snf7p, SEC31 - sec31p, YRB30 - yrb30p, NUP57 - nup57p, VID24…
GO:0051234	establishment of localization	0.00064	0.038	1.2	4095	995	982	286	[YGL140C - hypothetical protein, POM152 - pom152p, WSC4 - wsc4p, SEC20 - sec20p, TIP20 - tip20p, MUP3 - mup3p, VTS1 - vts1p, COX5A - cytochrome c oxidase subunit va, GPD1 - glycerol-3-phosphate dehydrogenase (nad(+)) gpd1, MRS2 - mrs2p, VMA4 - vma4p, GLE2 - gle2p, SNA2 - sna2p, POR1 - por1p, AGE1 - age1p, YIP3 - yip3p, PHO86 - pho86p, YRB30 - yrb30p, GRH1 - grh1p, NUP157 - nup157p, ALB1 - alb1p, …
GO:0015833	peptide transport	0.000694	0.0407	1.43	4095	482	590	99	[ARL3 - arl3p, NMD3 - nmd3p, WSC4 - wsc4p, SEC65 - sec65p, STI1 - sti1p, TIP20 - tip20p, NMD5 - nmd5p, VTS1 - vts1p, GPD1 - glycerol-3-phosphate dehydrogenase (nad(+)) gpd1, PHO88 - pho88p, GLE2 - gle2p, AGE1 - age1p, VPS15 - vps15p, YRB30 - yrb30p, NUP57 - nup57p, NUP157 - nup157p, VID24 - glucose-induced degradation complex subunit vid24, RIX7 - putative aaa family atpase rix7, SIS1 - sis1p, ST…
GO:0042886	amide transport	0.000709	0.0411	1.42	4095	488	590	100	[ARL3 - arl3p, NMD3 - nmd3p, WSC4 - wsc4p, SEC65 - sec65p, STI1 - sti1p, TIP20 - tip20p, NMD5 - nmd5p, VTS1 - vts1p, GPD1 - glycerol-3-phosphate dehydrogenase (nad(+)) gpd1, PHO88 - pho88p, GLE2 - gle2p, AGE1 - age1p, VPS15 - vps15p, YRB30 - yrb30p, NUP57 - nup57p, NUP157 - nup157p, VID24 - glucose-induced degradation complex subunit vid24, RIX7 - putative aaa family atpase rix7, SIS1 - sis1p, BR…
GO:0070462	plus-end specific microtubule depolymerization	0.000733	0.042	1365	4095	1	3	1	[KIP3 - tubulin-dependent atpase kip3]
GO:0015031	protein transport	0.000795	0.045	1.48	4095	479	486	84	[YPT7 - ypt7p, ARL3 - arl3p, NMD3 - nmd3p, WSC4 - wsc4p, SEC65 - sec65p, SRP1 - srp1p, SPC1 - spc1p, TIP20 - tip20p, NMD5 - nmd5p, VTS1 - vts1p, PHO88 - pho88p, GPD1 - glycerol-3-phosphate dehydrogenase (nad(+)) gpd1, MSN5 - msn5p, NUG1 - nug1p, GLE2 - gle2p, AGE1 - age1p, VPS15 - vps15p, SNF7 - snf7p, SEC31 - sec31p, YRB30 - yrb30p, NUP57 - nup57p, VID24 - glucose-induced degradation complex sub…
GO:0042790	nucleolar large rRNA transcription by RNA polymerase I	0.000798	0.0447	6.98	4095	16	220	6	[RPA43 - rpa43p, RPA14 - rpa14p, RPA34 - rpa34p, RPA190 - rpa190p, SPT15 - spt15p, RPA49 - rpa49p]
GO:0010499	proteasomal ubiquitin-independent protein catabolic process	0.000823	0.0456	4.99	4095	12	479	7	[PRE8 - proteasome core particle subunit alpha 2, PRE5 - proteasome core particle subunit alpha 6, PRE6 - proteasome core particle subunit alpha 4, PUP1 - proteasome core particle subunit beta 2, PRE4 - proteasome core particle subunit beta 7, PRE3 - pre3p, PRE10 - proteasome core particle subunit alpha 7]
GO:0051169	nuclear transport	0.000825	0.0451	1.91	4095	114	659	35	[NMD3 - nmd3p, YRA2 - yra2p, BCP1 - bcp1p, MLP2 - mlp2p, TIF6 - tif6p, TEF1 - tef1p, NUP84 - nup84p, MSN5 - msn5p, GLE2 - gle2p, NUG1 - nug1p, THP1 - thp1p, NUP145 - nup145p, ARX1 - arx1p, SPT6 - spt6p, ENP1 - enp1p, NEW1 - new1p, RIX7 - putative aaa family atpase rix7, YRA1 - yra1p, NUP159 - nup159p, RNA1 - rna1p, SLX9 - slx9p, SXM1 - sxm1p, NUP49 - nup49p, CEX1 - cex1p, RPB4 - rpb4p, RPS0A - ri…
GO:0032581	ER-dependent peroxisome organization	0.000839	0.0454	5.66	4095	9	482	6	[RTN2 - rtn2p, RTN1 - rtn1p, PEX29 - pex29p, YOP1 - yop1p, PEX19 - pex19p, PEX30 - pex30p]
GO:0070507	regulation of microtubule cytoskeleton organization	0.000847	0.0454	15.75	4095	26	40	4	[KIP3 - tubulin-dependent atpase kip3, DAD4 - dad4p, DAD3 - dad3p, ASK1 - ask1p]
GO:0051301	cell division	0.000853	0.0452	2.55	4095	180	187	21	[NNF1 - nnf1p, SMC2 - condensin subunit smc2, MCM21 - mcm21p, MIF2 - mif2p, DAD4 - dad4p, APC11 - anaphase promoting complex subunit 11, CDC12 - septin cdc12, VPS1 - vps1p, MOB2 - mob2p, DAD3 - dad3p, URM1 - ubiquitin-related modifier urm1, NUF2 - nuf2p, DOC1 - anaphase promoting complex subunit doc1, CSE1 - cse1p, SPC24 - spc24p, NKP2 - nkp2p, OKP1 - okp1p, AME1 - ame1p, DUO1 - duo1p, ASK1 - ask…
GO:0070897	DNA-templated transcriptional preinitiation complex assembly	0.000867	0.0454	3.46	4095	40	355	12	[MED2 - med2p, SRB2 - srb2p, CSE2 - cse2p, PGD1 - pgd1p, ROX3 - rox3p, GAL11 - gal11p, TAF14 - taf14p, SIN4 - sin4p, SPT15 - spt15p, TFG1 - tfg1p, MED6 - med6p, TAF12 - taf12p]
GO:0001109	promoter clearance during DNA-templated transcription	0.000873	0.0452	53.53	4095	3	51	2	[TAF14 - taf14p, TFG1 - tfg1p]
GO:0001111	promoter clearance from RNA polymerase II promoter	0.000873	0.0447	53.53	4095	3	51	2	[TAF14 - taf14p, TFG1 - tfg1p]
GO:0031081	nuclear pore distribution	0.000876	0.0444	5.25	4095	8	585	6	[SYH1 - syh1p, GLE2 - gle2p, NUP159 - nup159p, NUP145 - nup145p, NUP84 - nup84p, NUP133 - nup133p]
GO:0051664	nuclear pore localization	0.000876	0.044	5.25	4095	8	585	6	[GLE2 - gle2p, SYH1 - syh1p, NUP159 - nup159p, NUP145 - nup145p, NUP133 - nup133p, NUP84 - nup84p]
GO:1902905	positive regulation of supramolecular fiber organization	0.00091	0.0452	2.46	4095	33	859	17	[MYO3 - myosin 3, RHO5 - rho5p, ARC18 - arc18p, PFY1 - pfy1p, DAD4 - dad4p, DAD3 - dad3p, LAS17 - las17p, ARC40 - arc40p, DAD1 - dad1p, ARC35 - arc35p, SRV2 - srv2p, DUO1 - duo1p, ARC15 - arc15p, ASK1 - ask1p, BZZ1 - bzz1p, DAD2 - dad2p, BIM1 - bim1p]
GO:0006631	fatty acid metabolic process	0.000949	0.0467	31.02	4095	44	9	3	[ELO1 - elo1p, FEN1 - fatty acid elongase fen1, SUR4 - fatty acid elongase sur4]
GO:0045184	establishment of protein localization	0.000984	0.0479	1.48	4095	496	451	81	[YPT7 - ypt7p, ARL3 - arl3p, WSC4 - wsc4p, SEC65 - sec65p, SRP1 - srp1p, RFA2 - rfa2p, SPC1 - spc1p, TIP20 - tip20p, NMD5 - nmd5p, VTS1 - vts1p, PHO88 - pho88p, GPD1 - glycerol-3-phosphate dehydrogenase (nad(+)) gpd1, MSN5 - msn5p, NUG1 - nug1p, GLE2 - gle2p, AGE1 - age1p, VPS15 - vps15p, SNF7 - snf7p, SEC31 - sec31p, YRB30 - yrb30p, NUP57 - nup57p, VID24 - glucose-induced degradation complex sub…
GO:0032886	regulation of microtubule-based process	0.000987	0.0476	15.17	4095	27	40	4	[KIP3 - tubulin-dependent atpase kip3, DAD4 - dad4p, DAD3 - dad3p, ASK1 - ask1p]
GO:0031144	proteasome localization	0.000999	0.0477	43.11	4095	2	95	2	[STS1 - sts1p, SRP1 - srp1p]

## Sheet: Spc110C Component
GO Term	Description	P-value	FDR q-value	Enrichment	N	B	n	b	Genes
GO:0044446	intracellular organelle part	3.02e-19	3.04e-16	1.4	4095	2347	380	304	[TFA2 - tfa2p, NSA2 - nsa2p, LAS1 - las1p, WSC4 - wsc4p, TIP20 - tip20p, SBP1 - sbp1p, RPS16A - ribosomal 40s subunit protein s16a, NOP56 - nop56p, RPL37B - ribosomal 60s subunit protein l37b, COX5A - cytochrome c oxidase subunit va, GLE2 - gle2p, RPA43 - rpa43p, SPC24 - spc24p, NUT1 - nut1p, AGE1 - age1p, YIP3 - yip3p, PKR1 - pkr1p, RPA190 - rpa190p, MED2 - med2p, SIS1 - sis1p, TRS31 - trs31p, H…
GO:0044422	organelle part	4.02e-19	2.02e-16	1.39	4095	2350	380	304	[TFA2 - tfa2p, NSA2 - nsa2p, LAS1 - las1p, WSC4 - wsc4p, TIP20 - tip20p, SBP1 - sbp1p, RPS16A - ribosomal 40s subunit protein s16a, NOP56 - nop56p, RPL37B - ribosomal 60s subunit protein l37b, COX5A - cytochrome c oxidase subunit va, GLE2 - gle2p, RPA43 - rpa43p, SPC24 - spc24p, NUT1 - nut1p, AGE1 - age1p, YIP3 - yip3p, PKR1 - pkr1p, RPA190 - rpa190p, MED2 - med2p, SIS1 - sis1p, TRS31 - trs31p, H…
GO:0044428	nuclear part	3.1e-14	1.04e-11	1.88	4095	963	315	139	[NSA2 - nsa2p, TFA2 - tfa2p, FAF1 - faf1p, LAS1 - las1p, SNL1 - snl1p, SMC2 - condensin subunit smc2, RFA2 - rfa2p, SBP1 - sbp1p, NOP56 - nop56p, PFS2 - pfs2p, UTP14 - utp14p, GLE2 - gle2p, RPA43 - rpa43p, SPC24 - spc24p, KRI1 - kri1p, SPT6 - spt6p, RPA190 - rpa190p, NUP57 - nup57p, RIX7 - putative aaa family atpase rix7, MED2 - med2p, NNF1 - nnf1p, STS1 - sts1p, HSH49 - hsh49p, CBF2 - cbf2p, RRP…
GO:0032991	macromolecular complex	3.61e-13	9.08e-11	1.46	4095	1793	378	241	[TFA2 - tfa2p, NSA2 - nsa2p, LAS1 - las1p, TIP20 - tip20p, PRE10 - proteasome core particle subunit alpha 7, SBP1 - sbp1p, RPS16A - ribosomal 40s subunit protein s16a, NOP56 - nop56p, RPL37B - ribosomal 60s subunit protein l37b, GPD1 - glycerol-3-phosphate dehydrogenase (nad(+)) gpd1, COX5A - cytochrome c oxidase subunit va, GLE2 - gle2p, RPA43 - rpa43p, SPC24 - spc24p, NUT1 - nut1p, RPA190 - rpa…
GO:0043234	protein complex	1.13e-10	2.26e-08	1.62	4095	962	399	152	[TFA2 - tfa2p, SMC2 - condensin subunit smc2, RFA2 - rfa2p, TIP20 - tip20p, PRE10 - proteasome core particle subunit alpha 7, PFS2 - pfs2p, SWI4 - swi4p, COX5A - cytochrome c oxidase subunit va, PRE8 - proteasome core particle subunit alpha 2, KOG1 - kog1p, GLE2 - gle2p, IKI1 - elongator subunit iki1, SPC24 - spc24p, NUT1 - nut1p, VPS15 - vps15p, SPT6 - spt6p, GCD6 - gcd6p, NUP57 - nup57p, DIG1 -…
GO:0044432	endoplasmic reticulum part	8.54e-10	1.43e-07	1.85	4095	320	679	98	[PMT4 - pmt4p, SNL1 - snl1p, WSC4 - wsc4p, RTN1 - rtn1p, SEC20 - sec20p, TIP20 - tip20p, PHO88 - pho88p, EPS1 - protein disulfide isomerase eps1, PKR1 - pkr1p, SVP26 - svp26p, GPI13 - gpi13p, PMT3 - pmt3p, HMG2 - hydroxymethylglutaryl-coa reductase (nadph) hmg2, TSC13 - trans-2-enoyl-coa reductase (nadph) tsc13, POM33 - pom33p, OSH2 - osh2p, APQ12 - apq12p, YER140W - hypothetical protein, SSM4 - …
GO:0005634	nucleus	2.15e-09	3.08e-07	1.39	4095	1817	317	196	[NSA2 - nsa2p, TFA2 - tfa2p, LAS1 - las1p, BOP3 - bop3p, PRE10 - proteasome core particle subunit alpha 7, SBP1 - sbp1p, NOP56 - nop56p, GPD1 - glycerol-3-phosphate dehydrogenase (nad(+)) gpd1, GLE2 - gle2p, RPA43 - rpa43p, SPC24 - spc24p, YRB30 - yrb30p, RPA190 - rpa190p, ALB1 - alb1p, RTT105 - rtt105p, MED2 - med2p, SIS1 - sis1p, HSH49 - hsh49p, RRP7 - rrp7p, APC11 - anaphase promoting complex …
GO:0005694	chromosome	2.71e-09	3.41e-07	3.72	4095	125	264	30	[RFA3 - rfa3p, SMC5 - dna repair atpase smc5, SMC2 - condensin subunit smc2, SNF5 - snf5p, POB3 - pob3p, TBF1 - tbf1p, RFA2 - rfa2p, IPL1 - ipl1p, NUF2 - nuf2p, CDC6 - aaa family atpase cdc6, SPC24 - spc24p, OKP1 - okp1p, ABF2 - abf2p, NNF1 - nnf1p, RAD52 - recombinase rad52, SLI15 - sli15p, MCM21 - mcm21p, MIF2 - mif2p, CBF2 - cbf2p, DAD4 - dad4p, CTF19 - ctf19p, DAD3 - dad3p, CEP3 - cep3p, SMC6…
GO:0005789	endoplasmic reticulum membrane	3.71e-09	4.15e-07	1.96	4095	281	595	80	[PMT4 - pmt4p, SNL1 - snl1p, WSC4 - wsc4p, RTN1 - rtn1p, YPR071W - hypothetical protein, SPC1 - spc1p, IRC22 - irc22p, TIP20 - tip20p, SMF3 - putative divalent metal ion transporter smf3, PHO88 - pho88p, EPS1 - protein disulfide isomerase eps1, GPI8 - gpi8p, SEC31 - sec31p, PKR1 - pkr1p, RTN2 - rtn2p, GPI13 - gpi13p, PMT3 - pmt3p, SHR3 - shr3p, YLR072W - hypothetical protein, HMG2 - hydroxymethyl…
GO:0016592	mediator complex	4.54e-09	4.57e-07	6.54	4095	26	361	15	[MED2 - med2p, PGD1 - pgd1p, ROX3 - rox3p, RGR1 - rgr1p, TAF14 - taf14p, MED7 - med7p, MED6 - med6p, SRB2 - srb2p, MED4 - med4p, CSE2 - cse2p, NUT1 - nut1p, GAL11 - gal11p, MED1 - med1p, SIN4 - sin4p, SOH1 - soh1p]
GO:0043228	non-membrane-bounded organelle	1.01e-08	9.27e-07	1.81	4095	890	229	90	[NSA2 - nsa2p, FAF1 - faf1p, LAS1 - las1p, SNL1 - snl1p, SMC2 - condensin subunit smc2, FCF2 - fcf2p, RRP1 - rrp1p, RFA2 - rfa2p, RPS16A - ribosomal 40s subunit protein s16a, SBP1 - sbp1p, RPL37B - ribosomal 60s subunit protein l37b, GAR1 - gar1p, NOP56 - nop56p, NUF2 - nuf2p, UTP14 - utp14p, CBK1 - cbk1p, MRPS18 - mitochondrial 37s ribosomal protein yms18, PRP5 - dead-box rna helicase prp5, NUG1…
GO:0043232	intracellular non-membrane-bounded organelle	1.01e-08	8.49e-07	1.81	4095	890	229	90	[NSA2 - nsa2p, FAF1 - faf1p, LAS1 - las1p, SNL1 - snl1p, SMC2 - condensin subunit smc2, FCF2 - fcf2p, RRP1 - rrp1p, RFA2 - rfa2p, RPS16A - ribosomal 40s subunit protein s16a, SBP1 - sbp1p, RPL37B - ribosomal 60s subunit protein l37b, GAR1 - gar1p, NOP56 - nop56p, NUF2 - nuf2p, UTP14 - utp14p, CBK1 - cbk1p, MRPS18 - mitochondrial 37s ribosomal protein yms18, NUG1 - nug1p, PRP5 - dead-box rna helic…
GO:0000777	condensed chromosome kinetochore	1.39e-08	1.08e-06	6.08	4095	59	194	17	[NNF1 - nnf1p, SLI15 - sli15p, MCM21 - mcm21p, MIF2 - mif2p, DAD4 - dad4p, DAD3 - dad3p, IPL1 - ipl1p, CEP3 - cep3p, NUF2 - nuf2p, SPC24 - spc24p, NKP2 - nkp2p, OKP1 - okp1p, CSE4 - cse4p, AME1 - ame1p, DUO1 - duo1p, ASK1 - ask1p, DAD2 - dad2p]
GO:0070847	core mediator complex	1.54e-08	1.11e-06	7.14	4095	21	355	13	[MED2 - med2p, PGD1 - pgd1p, ROX3 - rox3p, RGR1 - rgr1p, MED7 - med7p, MED6 - med6p, SRB2 - srb2p, MED4 - med4p, CSE2 - cse2p, GAL11 - gal11p, MED1 - med1p, SIN4 - sin4p, SOH1 - soh1p]
GO:0044451	nucleoplasm part	4.1e-08	2.75e-06	2.45	4095	213	361	46	[TFA2 - tfa2p, SAP30 - sap30p, MCM2 - mcm2p, RPC19 - rpc19p, CFT2 - cft2p, HRP1 - hrp1p, PGD1 - pgd1p, POB3 - pob3p, KIN28 - kin28p, ROX3 - rox3p, TAF14 - taf14p, CFT1 - cft1p, MED7 - med7p, YNG2 - yng2p, PFS2 - pfs2p, CDC6 - aaa family atpase cdc6, RET1 - ret1p, CSE2 - cse2p, NUT1 - nut1p, RTG2 - rtg2p, PTA1 - pta1p, YAF9 - yaf9p, SPT6 - spt6p, SIN4 - sin4p, NOP10 - nop10p, RPC53 - rpc53p, TAF12…
GO:0005783	endoplasmic reticulum	5.67e-08	3.57e-06	1.55	4095	476	771	139	[PMT4 - pmt4p, SNL1 - snl1p, RTN1 - rtn1p, SLC1 - 1-acylglycerol-3-phosphate o-acyltransferase slc1, SEC20 - sec20p, TIP20 - tip20p, DRS2 - aminophospholipid-translocating p4-type atpase drs2, PHO88 - pho88p, EPS1 - protein disulfide isomerase eps1, MEP1 - mep1p, FPR2 - peptidylprolyl isomerase family protein fpr2, YBR096W - hypothetical protein, YIP3 - yip3p, PKR1 - pkr1p, PHO86 - pho86p, SVP26 …
GO:0000776	kinetochore	8.8e-08	5.21e-06	5.44	4095	66	194	17	[NNF1 - nnf1p, SLI15 - sli15p, MCM21 - mcm21p, MIF2 - mif2p, DAD4 - dad4p, DAD3 - dad3p, IPL1 - ipl1p, CEP3 - cep3p, NUF2 - nuf2p, SPC24 - spc24p, NKP2 - nkp2p, OKP1 - okp1p, CSE4 - cse4p, AME1 - ame1p, DUO1 - duo1p, ASK1 - ask1p, DAD2 - dad2p]
GO:0000775	chromosome, centromeric region	1.19e-07	6.64e-06	5.36	4095	67	194	17	[NNF1 - nnf1p, SLI15 - sli15p, MCM21 - mcm21p, MIF2 - mif2p, DAD4 - dad4p, DAD3 - dad3p, IPL1 - ipl1p, CEP3 - cep3p, NUF2 - nuf2p, SPC24 - spc24p, NKP2 - nkp2p, OKP1 - okp1p, CSE4 - cse4p, AME1 - ame1p, DUO1 - duo1p, ASK1 - ask1p, DAD2 - dad2p]
GO:0090575	RNA polymerase II transcription factor complex	3.7e-07	1.96e-05	3.7	4095	63	386	22	[TFA2 - tfa2p, MED2 - med2p, PGD1 - pgd1p, ROX3 - rox3p, KIN28 - kin28p, RGR1 - rgr1p, TAF14 - taf14p, TFG1 - tfg1p, SPT15 - spt15p, MED7 - med7p, MED6 - med6p, SWI4 - swi4p, SRB2 - srb2p, MED4 - med4p, CSE2 - cse2p, INO2 - ino2p, GAL11 - gal11p, MED1 - med1p, SIN4 - sin4p, SWI6 - swi6p, SOH1 - soh1p, TAF12 - taf12p]
GO:0030684	preribosome	5.69e-07	2.86e-05	1.97	4095	135	878	57	[NSA2 - nsa2p, RPS0B - ribosomal 40s subunit protein s0b, CGR1 - cgr1p, LAS1 - las1p, NMD3 - nmd3p, IPI1 - ipi1p, RRP1 - rrp1p, KRR1 - krr1p, RPS16A - ribosomal 40s subunit protein s16a, NOP56 - nop56p, RPL37B - ribosomal 60s subunit protein l37b, UTP14 - utp14p, UTP10 - utp10p, REI1 - rei1p, BUD22 - bud22p, NUG1 - nug1p, RLI1 - rli1p, KRI1 - kri1p, RPS8B - ribosomal 40s subunit protein s8b, ARX1…
GO:0005730	nucleolus	1.36e-06	6.51e-05	2.61	4095	233	229	34	[NSA2 - nsa2p, LAS1 - las1p, FAF1 - faf1p, FAL1 - fal1p, FCF2 - fcf2p, NIP7 - nip7p, RRP1 - rrp1p, TIF6 - tif6p, SBP1 - sbp1p, RPA49 - rpa49p, NOP56 - nop56p, GAR1 - gar1p, UTP14 - utp14p, PRP5 - dead-box rna helicase prp5, NUG1 - nug1p, RPA43 - rpa43p, RPA14 - rpa14p, KRI1 - kri1p, REX4 - rex4p, RPA190 - rpa190p, UTP21 - utp21p, NOP10 - nop10p, YTM1 - ytm1p, RCL1 - rcl1p, MRT4 - mrt4p, RIX7 - pu…
GO:0055029	nuclear DNA-directed RNA polymerase complex	8.44e-06	0.000386	5.5	4095	36	248	12	[RPC37 - rpc37p, RPB11 - rpb11p, RET1 - ret1p, RPA14 - rpa14p, RPA43 - rpa43p, RPC17 - rpc17p, POB3 - pob3p, RPA34 - rpa34p, RPA190 - rpa190p, RPB4 - rpb4p, RPC53 - rpc53p, RPA49 - rpa49p]
GO:0043226	organelle	9.12e-06	0.000399	1.09	4095	3501	342	320	[NSA2 - nsa2p, TFA2 - tfa2p, LAS1 - las1p, BOP3 - bop3p, PRE10 - proteasome core particle subunit alpha 7, SBP1 - sbp1p, RPS16A - ribosomal 40s subunit protein s16a, MRF1 - mrf1p, RPL37B - ribosomal 60s subunit protein l37b, NOP56 - nop56p, COX5A - cytochrome c oxidase subunit va, GPD1 - glycerol-3-phosphate dehydrogenase (nad(+)) gpd1, GLE2 - gle2p, RPA43 - rpa43p, SPC24 - spc24p, AGE1 - age1p, …
GO:0000428	DNA-directed RNA polymerase complex	1.14e-05	0.00048	5.36	4095	37	248	12	[RPC37 - rpc37p, RPB11 - rpb11p, RET1 - ret1p, RPA14 - rpa14p, RPA43 - rpa43p, RPC17 - rpc17p, POB3 - pob3p, RPA34 - rpa34p, RPA190 - rpa190p, RPB4 - rpb4p, RPC53 - rpc53p, RPA49 - rpa49p]
GO:0030880	RNA polymerase complex	1.14e-05	0.00046	5.36	4095	37	248	12	[RPC37 - rpc37p, RPB11 - rpb11p, RET1 - ret1p, RPA14 - rpa14p, RPA43 - rpa43p, RPC17 - rpc17p, POB3 - pob3p, RPA34 - rpa34p, RPA190 - rpa190p, RPB4 - rpb4p, RPC53 - rpc53p, RPA49 - rpa49p]
GO:0043229	intracellular organelle	1.91e-05	0.000738	1.09	4095	3500	342	320	[NSA2 - nsa2p, TFA2 - tfa2p, LAS1 - las1p, BOP3 - bop3p, PRE10 - proteasome core particle subunit alpha 7, SBP1 - sbp1p, RPS16A - ribosomal 40s subunit protein s16a, MRF1 - mrf1p, RPL37B - ribosomal 60s subunit protein l37b, NOP56 - nop56p, COX5A - cytochrome c oxidase subunit va, GPD1 - glycerol-3-phosphate dehydrogenase (nad(+)) gpd1, GLE2 - gle2p, RPA43 - rpa43p, SPC24 - spc24p, AGE1 - age1p, …
GO:0098687	chromosomal region	2.15e-05	0.0008	3.14	4095	148	194	22	[RFA3 - rfa3p, NNF1 - nnf1p, SLI15 - sli15p, POL30 - pol30p, MCM21 - mcm21p, MIF2 - mif2p, DAD4 - dad4p, TBF1 - tbf1p, RFA2 - rfa2p, DAD3 - dad3p, IPL1 - ipl1p, NUP84 - nup84p, CEP3 - cep3p, NUF2 - nuf2p, SPC24 - spc24p, NKP2 - nkp2p, OKP1 - okp1p, CSE4 - cse4p, AME1 - ame1p, DUO1 - duo1p, ASK1 - ask1p, DAD2 - dad2p]
GO:0044798	nuclear transcription factor complex	2.26e-05	0.000814	2.99	4095	78	386	22	[TFA2 - tfa2p, MED2 - med2p, PGD1 - pgd1p, ROX3 - rox3p, KIN28 - kin28p, RGR1 - rgr1p, TAF14 - taf14p, TFG1 - tfg1p, SPT15 - spt15p, MED7 - med7p, MED6 - med6p, SWI4 - swi4p, SRB2 - srb2p, MED4 - med4p, CSE2 - cse2p, INO2 - ino2p, GAL11 - gal11p, MED1 - med1p, SIN4 - sin4p, SWI6 - swi6p, SOH1 - soh1p, TAF12 - taf12p]
GO:0043227	membrane-bounded organelle	2.27e-05	0.000788	1.2	4095	3256	109	104	[NSA2 - nsa2p, LAS1 - las1p, SMC2 - condensin subunit smc2, PFS2 - pfs2p, GPD1 - glycerol-3-phosphate dehydrogenase (nad(+)) gpd1, MRPS18 - mitochondrial 37s ribosomal protein yms18, GLE2 - gle2p, KRI1 - kri1p, YIP3 - yip3p, YRB30 - yrb30p, RPA190 - rpa190p, NNF1 - nnf1p, LSB1 - lsb1p, POL30 - pol30p, TRS31 - trs31p, STS1 - sts1p, HSH49 - hsh49p, NEO1 - putative aminophospholipid-translocating p4…
GO:0030176	integral component of endoplasmic reticulum membrane	2.35e-05	0.000789	3.8	4095	53	325	16	[FEN1 - fatty acid elongase fen1, LAS21 - las21p, ERV41 - erv41p, RTN1 - rtn1p, SUR4 - fatty acid elongase sur4, FLD1 - fld1p, SHR3 - shr3p, SPC1 - spc1p, ERG4 - delta(24(24(1)))-sterol reductase, EMP47 - emp47p, ELO1 - elo1p, SSM4 - e3 ubiquitin-protein ligase ssm4, ERG24 - delta(14)-sterol reductase, PKR1 - pkr1p, ICE2 - ice2p, STE24 - ste24p]
GO:0000817	COMA complex	2.39e-05	0.000776	18.28	4095	4	224	4	[MCM21 - mcm21p, OKP1 - okp1p, AME1 - ame1p, CTF19 - ctf19p]
GO:0043231	intracellular membrane-bounded organelle	2.54e-05	0.0008	1.2	4095	3199	117	110	[NSA2 - nsa2p, LAS1 - las1p, SMC2 - condensin subunit smc2, PFS2 - pfs2p, GPD1 - glycerol-3-phosphate dehydrogenase (nad(+)) gpd1, MRPS18 - mitochondrial 37s ribosomal protein yms18, GLE2 - gle2p, KRI1 - kri1p, YIP3 - yip3p, YRB30 - yrb30p, RPA190 - rpa190p, NNF1 - nnf1p, LSB1 - lsb1p, POL30 - pol30p, TRS31 - trs31p, STS1 - sts1p, HSH49 - hsh49p, NEO1 - putative aminophospholipid-translocating p4…
GO:0005816	spindle pole body	3.07e-05	0.000937	21.33	4095	64	15	5	[SPC42 - spc42p, NKP2 - nkp2p, AME1 - ame1p, SPC29 - spc29p, ASK1 - ask1p]
GO:0031227	intrinsic component of endoplasmic reticulum membrane	3.18e-05	0.000942	3.73	4095	54	325	16	[FEN1 - fatty acid elongase fen1, LAS21 - las21p, ERV41 - erv41p, RTN1 - rtn1p, SUR4 - fatty acid elongase sur4, FLD1 - fld1p, SHR3 - shr3p, SPC1 - spc1p, ERG4 - delta(24(24(1)))-sterol reductase, EMP47 - emp47p, ELO1 - elo1p, SSM4 - e3 ubiquitin-protein ligase ssm4, ERG24 - delta(14)-sterol reductase, PKR1 - pkr1p, ICE2 - ice2p, STE24 - ste24p]
GO:0005815	microtubule organizing center	4.18e-05	0.0012	20.07	4095	68	15	5	[SPC42 - spc42p, NKP2 - nkp2p, AME1 - ame1p, SPC29 - spc29p, ASK1 - ask1p]
GO:0042729	DASH complex	5.24e-05	0.00147	13.69	4095	8	187	5	[DAD4 - dad4p, DAD3 - dad3p, DUO1 - duo1p, ASK1 - ask1p, DAD2 - dad2p]
GO:0044452	nucleolar part	0.000105	0.00287	3.91	4095	64	229	14	[RRP7 - rrp7p, SPT15 - spt15p, UTP18 - utp18p, RPA49 - rpa49p, GAR1 - gar1p, NOP56 - nop56p, RPA43 - rpa43p, RPA14 - rpa14p, RPA34 - rpa34p, UTP15 - utp15p, RPA190 - rpa190p, UTP21 - utp21p, NOP10 - nop10p, YTM1 - ytm1p]
GO:0016021	integral component of membrane	0.000116	0.00307	1.3	4095	845	715	192	[PMT4 - pmt4p, SNL1 - snl1p, LPP1 - phosphatidate phosphatase lpp1, KTR6 - ktr6p, KRE1 - kre1p, WSC4 - wsc4p, RTN1 - rtn1p, SLC1 - 1-acylglycerol-3-phosphate o-acyltransferase slc1, SEC20 - sec20p, MFM1 - mfm1p, MUP3 - mup3p, NMD5 - nmd5p, PHO88 - pho88p, UTP10 - utp10p, COX5A - cytochrome c oxidase subunit va, EPS1 - protein disulfide isomerase eps1, GLE2 - gle2p, MEP1 - mep1p, ALO1 - d-arabinon…
GO:0044430	cytoskeletal part	0.000122	0.00316	5.79	4095	199	32	9	[SLI15 - sli15p, SPC42 - spc42p, KIP3 - tubulin-dependent atpase kip3, NKP2 - nkp2p, TPD3 - tpd3p, AME1 - ame1p, DAD3 - dad3p, SPC29 - spc29p, ASK1 - ask1p]
GO:0000940	condensed chromosome outer kinetochore	0.000175	0.00439	19.98	4095	10	82	4	[DAD4 - dad4p, DAD3 - dad3p, DUO1 - duo1p, ASK1 - ask1p]
GO:0000942	condensed nuclear chromosome outer kinetochore	0.000175	0.00429	19.98	4095	10	82	4	[DAD4 - dad4p, DUO1 - duo1p, DAD3 - dad3p, ASK1 - ask1p]
GO:0042765	GPI-anchor transamidase complex	0.000177	0.00425	22.02	4095	3	186	3	[GPI8 - gpi8p, GPI17 - gpi17p, GAA1 - gaa1p]
GO:0005667	transcription factor complex	0.000191	0.00447	2.65	4095	88	386	22	[TFA2 - tfa2p, MED2 - med2p, PGD1 - pgd1p, ROX3 - rox3p, KIN28 - kin28p, RGR1 - rgr1p, TAF14 - taf14p, TFG1 - tfg1p, SPT15 - spt15p, MED7 - med7p, MED6 - med6p, SWI4 - swi4p, SRB2 - srb2p, MED4 - med4p, CSE2 - cse2p, INO2 - ino2p, GAL11 - gal11p, MED1 - med1p, SIN4 - sin4p, SWI6 - swi6p, SOH1 - soh1p, TAF12 - taf12p]
GO:0031224	intrinsic component of membrane	0.000225	0.00514	1.28	4095	875	715	196	[LPP1 - phosphatidate phosphatase lpp1, WSC4 - wsc4p, SLC1 - 1-acylglycerol-3-phosphate o-acyltransferase slc1, SEC20 - sec20p, MUP3 - mup3p, COX5A - cytochrome c oxidase subunit va, UTP10 - utp10p, GLE2 - gle2p, SNA2 - sna2p, YIP3 - yip3p, PHO86 - pho86p, PKR1 - pkr1p, NUP157 - nup157p, PTR2 - ptr2p, PMT3 - pmt3p, YDL012C - hypothetical protein, TSC13 - trans-2-enoyl-coa reductase (nadph) tsc13,…
GO:0005643	nuclear pore	0.000239	0.00535	2.09	4095	57	963	28	[POM152 - pom152p, SRP1 - srp1p, MLP2 - mlp2p, NUP192 - nup192p, KAP122 - kap122p, KAP120 - kap120p, NUP84 - nup84p, THP1 - thp1p, GLE2 - gle2p, NUP145 - nup145p, VPS15 - vps15p, NUP57 - nup57p, NUP157 - nup157p, NUP85 - nup85p, NDC1 - ndc1p, NUP159 - nup159p, SXM1 - sxm1p, POM33 - pom33p, NUP49 - nup49p, CEX1 - cex1p, PER33 - per33p, VPS34 - phosphatidylinositol 3-kinase vps34, NUP53 - nup53p, N…
GO:0044425	membrane part	0.000258	0.00565	1.27	4095	1097	590	201	[WSC4 - wsc4p, SLC1 - 1-acylglycerol-3-phosphate o-acyltransferase slc1, TIP20 - tip20p, COX5A - cytochrome c oxidase subunit va, GLE2 - gle2p, SNA2 - sna2p, YIP3 - yip3p, PHO86 - pho86p, PKR1 - pkr1p, NUP157 - nup157p, PTR2 - ptr2p, YDL012C - hypothetical protein, TSC13 - trans-2-enoyl-coa reductase (nadph) tsc13, TIM18 - tim18p, YER140W - hypothetical protein, SNA3 - sna3p, PEX29 - pex29p, KRE2…
GO:0051233	spindle midzone	0.000268	0.00574	3.95	4095	9	921	8	[SLI15 - sli15p, BIR1 - bir1p, KIP3 - tubulin-dependent atpase kip3, CBF2 - cbf2p, ASE1 - ase1p, DAD2 - dad2p, BIM1 - bim1p, IPL1 - ipl1p]
GO:0005674	transcription factor TFIIF complex	0.000304	0.00638	80.29	4095	2	51	2	[TAF14 - taf14p, TFG1 - tfg1p]
GO:0071782	endoplasmic reticulum tubular network	0.000335	0.00687	3.69	4095	21	582	11	[TCB3 - tcb3p, RTN2 - rtn2p, YSP1 - ysp1p, RTN1 - rtn1p, FLD1 - fld1p, YOP1 - yop1p, TCB2 - tcb2p, DPL1 - sphinganine-1-phosphate aldolase dpl1, ICE2 - ice2p, SEY1 - sey1p, OSH2 - osh2p]
GO:0098827	endoplasmic reticulum subcompartment	0.000335	0.00674	3.69	4095	21	582	11	[TCB3 - tcb3p, RTN2 - rtn2p, YSP1 - ysp1p, RTN1 - rtn1p, FLD1 - fld1p, YOP1 - yop1p, TCB2 - tcb2p, DPL1 - sphinganine-1-phosphate aldolase dpl1, ICE2 - ice2p, SEY1 - sey1p, OSH2 - osh2p]
GO:0000780	condensed nuclear chromosome, centromeric region	0.000407	0.00803	5.8	4095	13	380	7	[NUF2 - nuf2p, SPC24 - spc24p, MIF2 - mif2p, CBF2 - cbf2p, CSE4 - cse4p, IPL1 - ipl1p, TID3 - tid3p]
GO:0030686	90S preribosome	0.00051	0.00987	2.12	4095	59	853	26	[RPS0B - ribosomal 40s subunit protein s0b, RPS1B - ribosomal 40s subunit protein s1b, KRR1 - krr1p, RPS16A - ribosomal 40s subunit protein s16a, NOP56 - nop56p, UTP10 - utp10p, SOF1 - sof1p, RPS7B - ribosomal 40s subunit protein s7b, BUD22 - bud22p, KRI1 - kri1p, RPS8B - ribosomal 40s subunit protein s8b, UTP6 - utp6p, UTP20 - utp20p, UTP21 - utp21p, ENP1 - enp1p, RCL1 - rcl1p, RPS4B - ribosomal…
GO:0005823	central plaque of spindle pole body	0.000522	0.00991	113.75	4095	6	12	2	[SPC42 - spc42p, SPC29 - spc29p]
GO:0044445	cytosolic part	0.000522	0.00973	1.79	4095	191	515	43	[RPS1B - ribosomal 40s subunit protein s1b, PUP1 - proteasome core particle subunit beta 2, RPL21A - ribosomal 60s subunit protein l21a, RPL24A - ribosomal 60s subunit protein l24a, SNL1 - snl1p, RPL14A - ribosomal 60s subunit protein l14a, NMD3 - nmd3p, RPN1 - proteasome regulatory particle base subunit rpn1, RPL35B - ribosomal 60s subunit protein l35b, RPL7A - ribosomal 60s subunit protein l7a,…
GO:0000815	ESCRT III complex	0.000585	0.0107	81.9	4095	4	25	2	[DID4 - did4p, SNF7 - snf7p]
GO:0032541	cortical endoplasmic reticulum	0.000662	0.0119	3.7	4095	19	582	10	[TCB3 - tcb3p, RTN2 - rtn2p, YSP1 - ysp1p, RTN1 - rtn1p, FLD1 - fld1p, TCB2 - tcb2p, DPL1 - sphinganine-1-phosphate aldolase dpl1, ICE2 - ice2p, SEY1 - sey1p, OSH2 - osh2p]
GO:0061576	acyl-CoA ceramide synthase complex	0.00068	0.012	53.88	4095	2	76	2	[LAG1 - sphingosine n-acyltransferase lag1, LAC1 - sphingosine n-acyltransferase lac1]
GO:0061673	mitotic spindle astral microtubule	0.000733	0.0127	1365	4095	1	3	1	[KIP3 - tubulin-dependent atpase kip3]
GO:0000779	condensed chromosome, centromeric region	0.000734	0.0125	5.39	4095	14	380	7	[NUF2 - nuf2p, SPC24 - spc24p, MIF2 - mif2p, CBF2 - cbf2p, CSE4 - cse4p, IPL1 - ipl1p, TID3 - tid3p]
GO:0005666	DNA-directed RNA polymerase III complex	0.000803	0.0135	28.44	4095	12	36	3	[RPC37 - rpc37p, RET1 - ret1p, RPC17 - rpc17p]
GO:0005839	proteasome core complex	0.000823	0.0136	4.99	4095	12	479	7	[PRE8 - proteasome core particle subunit alpha 2, PRE5 - proteasome core particle subunit alpha 6, PRE6 - proteasome core particle subunit alpha 4, PUP1 - proteasome core particle subunit beta 2, PRE4 - proteasome core particle subunit beta 7, PRE3 - pre3p, PRE10 - proteasome core particle subunit alpha 7]

## Sheet: Spc110N Process
GO Term	Description	P-value	FDR q-value	Enrichment	N	B	n	b	Genes
GO:0008610	lipid biosynthetic process	8.28e-22	4.03e-18	4.94	4095	142	298	51	[YMR134W - hypothetical protein, SLC1 - 1-acylglycerol-3-phosphate o-acyltransferase slc1, GPT2 - bifunctional glycerol-3-phosphate/glycerone-phosphate o-acyltransferase gpt2, SCT1 - bifunctional glycerol-3-phosphate/glycerone-phosphate o-acyltransferase sct1, PBN1 - pbn1p, ERG4 - delta(24(24(1)))-sterol reductase, ERG5 - c-22 sterol desaturase, GPI8 - gpi8p, ERG26 - sterol-4-alpha-carboxylate 3-…
GO:0044255	cellular lipid metabolic process	5.33e-17	1.3e-13	3.9	4095	220	253	53	[YMR134W - hypothetical protein, SCT1 - bifunctional glycerol-3-phosphate/glycerone-phosphate o-acyltransferase sct1, GPT2 - bifunctional glycerol-3-phosphate/glycerone-phosphate o-acyltransferase gpt2, PBN1 - pbn1p, ERG4 - delta(24(24(1)))-sterol reductase, ERG5 - c-22 sterol desaturase, ORM2 - orm2p, ALG1 - chitobiosyldiphosphodolichol beta-1,4 mannosyltransferase, GPI8 - gpi8p, ALG11 - alpha-1…
GO:0006629	lipid metabolic process	6.96e-17	1.13e-13	3.76	4095	237	253	55	[YMR134W - hypothetical protein, SCT1 - bifunctional glycerol-3-phosphate/glycerone-phosphate o-acyltransferase sct1, GPT2 - bifunctional glycerol-3-phosphate/glycerone-phosphate o-acyltransferase gpt2, PBN1 - pbn1p, ERG4 - delta(24(24(1)))-sterol reductase, ERG5 - c-22 sterol desaturase, ORM2 - orm2p, ALG1 - chitobiosyldiphosphodolichol beta-1,4 mannosyltransferase, GPI8 - gpi8p, ALG11 - alpha-1…
GO:0006643	membrane lipid metabolic process	3.3e-14	4.02e-11	10.75	4095	57	127	19	[FEN1 - fatty acid elongase fen1, LAS21 - las21p, LCB1 - serine c-palmitoyltransferase lcb1, DGA1 - diacylglycerol o-acyltransferase, GPI13 - gpi13p, GPI19 - gpi19p, SUR4 - fatty acid elongase sur4, GPI17 - gpi17p, LAG1 - sphingosine n-acyltransferase lag1, SUR2 - sphingosine hydroxylase, DPL1 - sphinganine-1-phosphate aldolase dpl1, LCB2 - serine c-palmitoyltransferase lcb2, PBN1 - pbn1p, GPI11 …
GO:0046467	membrane lipid biosynthetic process	3.4e-14	3.31e-11	12.75	4095	43	127	17	[FEN1 - fatty acid elongase fen1, LAS21 - las21p, LCB1 - serine c-palmitoyltransferase lcb1, GPI19 - gpi19p, GPI13 - gpi13p, SUR4 - fatty acid elongase sur4, GPI17 - gpi17p, LAG1 - sphingosine n-acyltransferase lag1, SUR2 - sphingosine hydroxylase, LCB2 - serine c-palmitoyltransferase lcb2, PBN1 - pbn1p, GPI11 - gpi11p, ELO1 - elo1p, GPI8 - gpi8p, MCD4 - mcd4p, LAC1 - sphingosine n-acyltransferas…
GO:0008608	attachment of spindle microtubules to kinetochore	2.56e-12	2.08e-09	19.5	4095	30	84	12	[DSN1 - dsn1p, NUF2 - nuf2p, MIF2 - mif2p, RTS1 - rts1p, OKP1 - okp1p, AME1 - ame1p, SPC105 - spc105p, DUO1 - duo1p, DAD3 - dad3p, ASK1 - ask1p, BUB1 - bub1p, TID3 - tid3p]
GO:0048193	Golgi vesicle transport	2.34e-11	1.63e-08	2.13	4095	163	897	76	[SEC26 - sec26p, ARL3 - arl3p, TRS20 - trs20p, SEC27 - sec27p, COG6 - cog6p, CHS5 - chs5p, GET1 - get1p, GGA1 - gga1p, TIP20 - tip20p, DRS2 - aminophospholipid-translocating p4-type atpase drs2, AGE1 - age1p, YIP3 - yip3p, SEC31 - sec31p, PHO86 - pho86p, IRE1 - ire1p, EXO84 - exo84p, GRH1 - grh1p, SVP26 - svp26p, APL6 - apl6p, COG5 - cog5p, SEC21 - sec21p, PEP5 - pep5p, TRS31 - trs31p, SEC39 - se…
GO:0045017	glycerolipid biosynthetic process	5.06e-11	3.08e-08	5.7	4095	53	298	22	[LAS21 - las21p, DGA1 - diacylglycerol o-acyltransferase, GPI13 - gpi13p, GPI19 - gpi19p, GPI17 - gpi17p, OPI3 - opi3p, PER1 - per1p, SLC1 - 1-acylglycerol-3-phosphate o-acyltransferase slc1, SAC1 - phosphatidylinositol-3-phosphatase sac1, SCT1 - bifunctional glycerol-3-phosphate/glycerone-phosphate o-acyltransferase sct1, GPT2 - bifunctional glycerol-3-phosphate/glycerone-phosphate o-acyltransfe…
GO:0051641	cellular localization	1.56e-10	8.47e-08	1.45	4095	698	932	230	[SEC27 - sec27p, COG6 - cog6p, NPC2 - npc2p, RPS26B - ribosomal 40s subunit protein s26b, GPD1 - glycerol-3-phosphate dehydrogenase (nad(+)) gpd1, SEC13 - sec13p, SNA2 - sna2p, AGE1 - age1p, YIP3 - yip3p, COS8 - cos8p, PHO86 - pho86p, GRH1 - grh1p, COG5 - cog5p, PBS2 - pbs2p, TRS31 - trs31p, COG3 - cog3p, LDB19 - ldb19p, MYO2 - myosin 2, SCC4 - scc4p, RPB4 - rpb4p, ERP3 - erp3p, VPS60 - vps60p, S…
GO:0046474	glycerophospholipid biosynthetic process	1.93e-10	9.41e-08	5.66	4095	51	298	21	[LAS21 - las21p, GPI13 - gpi13p, GPI19 - gpi19p, GPI17 - gpi17p, OPI3 - opi3p, PER1 - per1p, SLC1 - 1-acylglycerol-3-phosphate o-acyltransferase slc1, SAC1 - phosphatidylinositol-3-phosphatase sac1, SCT1 - bifunctional glycerol-3-phosphate/glycerone-phosphate o-acyltransferase sct1, GPT2 - bifunctional glycerol-3-phosphate/glycerone-phosphate o-acyltransferase gpt2, PBN1 - pbn1p, GPI11 - gpi11p, …
GO:0033036	macromolecule localization	4.92e-10	2.18e-07	1.48	4095	602	929	202	[SEC27 - sec27p, COG6 - cog6p, TIP20 - tip20p, GPD1 - glycerol-3-phosphate dehydrogenase (nad(+)) gpd1, SEC13 - sec13p, AGE1 - age1p, COS8 - cos8p, YRB30 - yrb30p, GRH1 - grh1p, COG5 - cog5p, PBS2 - pbs2p, COG3 - cog3p, LDB19 - ldb19p, MYO2 - myosin 2, SCC4 - scc4p, ERP3 - erp3p, VPS60 - vps60p, VPS35 - vps35p, PBI2 - pbi2p, VPS52 - vps52p, IWR1 - iwr1p, CDC10 - septin cdc10, DID4 - did4p, VPS1 -…
GO:0007059	chromosome segregation	6.29e-10	2.55e-07	13.28	4095	100	37	12	[NUF2 - nuf2p, DSN1 - dsn1p, SPC25 - spc25p, MIF2 - mif2p, KIP3 - tubulin-dependent atpase kip3, SPC24 - spc24p, NKP2 - nkp2p, OKP1 - okp1p, MTW1 - mtw1p, NSL1 - nsl1p, DAD3 - dad3p, TID3 - tid3p]
GO:0051179	localization	9.08e-10	3.4e-07	1.33	4095	1116	882	319	[PHS1 - phs1p, GNP1 - gnp1p, COG6 - cog6p, SEC27 - sec27p, RPS26B - ribosomal 40s subunit protein s26b, NPC2 - npc2p, TIP20 - tip20p, YCK3 - yck3p, GPD1 - glycerol-3-phosphate dehydrogenase (nad(+)) gpd1, VMA4 - vma4p, SEC13 - sec13p, SNA2 - sna2p, AGE1 - age1p, YIP3 - yip3p, PMR1 - ca(2+)/mn(2+)-transporting p-type atpase pmr1, PHO86 - pho86p, COS8 - cos8p, YRB30 - yrb30p, GRH1 - grh1p, ALB1 - a…
GO:0016192	vesicle-mediated transport	1.68e-09	5.86e-07	1.66	4095	343	899	125	[SEC26 - sec26p, ARL3 - arl3p, COG6 - cog6p, SEC27 - sec27p, TIP20 - tip20p, YCK3 - yck3p, DRS2 - aminophospholipid-translocating p4-type atpase drs2, SEC13 - sec13p, SNA2 - sna2p, AGE1 - age1p, YIP3 - yip3p, PHO86 - pho86p, COS8 - cos8p, EXO84 - exo84p, GRH1 - grh1p, SVP26 - svp26p, COG5 - cog5p, SEC16 - sec16p, SEC21 - sec21p, TRS31 - trs31p, BRO1 - bro1p, SEC39 - sec39p, NEO1 - putative aminop…
GO:0008104	protein localization	2.18e-09	7.06e-07	1.47	4095	581	929	194	[SEC27 - sec27p, COG6 - cog6p, TIP20 - tip20p, GPD1 - glycerol-3-phosphate dehydrogenase (nad(+)) gpd1, SEC13 - sec13p, AGE1 - age1p, COS8 - cos8p, YRB30 - yrb30p, GRH1 - grh1p, COG5 - cog5p, PBS2 - pbs2p, COG3 - cog3p, LDB19 - ldb19p, MYO2 - myosin 2, SCC4 - scc4p, ERP3 - erp3p, VPS60 - vps60p, VPS35 - vps35p, PBI2 - pbi2p, VPS52 - vps52p, IWR1 - iwr1p, CDC10 - septin cdc10, DID4 - did4p, VPS1 -…
GO:0006888	ER to Golgi vesicle-mediated transport	3.63e-09	1.1e-06	2.6	4095	72	876	40	[SEC26 - sec26p, ERP5 - erp5p, SEC7 - sec7p, TRS20 - trs20p, SEC27 - sec27p, ERV41 - erv41p, SFB3 - sfb3p, SEC28 - sec28p, COP1 - cop1p, SOP4 - sop4p, AGE1 - age1p, YIP3 - yip3p, PHO86 - pho86p, SEC31 - sec31p, GRH1 - grh1p, SVP26 - svp26p, ERP1 - erp1p, TCA17 - tca17p, SEC21 - sec21p, CHS7 - chs7p, TRS31 - trs31p, COG3 - cog3p, GOT1 - got1p, SHR3 - shr3p, UFE1 - ufe1p, AGE2 - age2p, SEC24 - sec2…
GO:0006506	GPI anchor biosynthetic process	1.56e-08	4.47e-06	15.67	4095	21	112	9	[PBN1 - pbn1p, GPI11 - gpi11p, LAS21 - las21p, GPI8 - gpi8p, GPI19 - gpi19p, GPI13 - gpi13p, GPI17 - gpi17p, MCD4 - mcd4p, GAA1 - gaa1p]
GO:0034501	protein localization to kinetochore	3.74e-08	1.01e-05	148.91	4095	10	11	4	[AME1 - ame1p, SPC105 - spc105p, BUB1 - bub1p, TID3 - tid3p]
GO:0006497	protein lipidation	4.13e-08	1.06e-05	12.19	4095	30	112	10	[PBN1 - pbn1p, GPI11 - gpi11p, AKR1 - akr1p, LAS21 - las21p, GPI13 - gpi13p, GPI8 - gpi8p, GPI19 - gpi19p, GPI17 - gpi17p, MCD4 - mcd4p, GAA1 - gaa1p]
GO:0006505	GPI anchor metabolic process	4.28e-08	1.04e-05	14.31	4095	23	112	9	[PBN1 - pbn1p, GPI11 - gpi11p, LAS21 - las21p, GPI8 - gpi8p, GPI19 - gpi19p, GPI13 - gpi13p, GPI17 - gpi17p, MCD4 - mcd4p, GAA1 - gaa1p]
GO:0045184	establishment of protein localization	4.98e-08	1.16e-05	1.48	4095	496	929	166	[SEC26 - sec26p, ARL3 - arl3p, NMD3 - nmd3p, SEC27 - sec27p, COG6 - cog6p, SEC65 - sec65p, RFA2 - rfa2p, TIP20 - tip20p, DRS2 - aminophospholipid-translocating p4-type atpase drs2, PHO88 - pho88p, GPD1 - glycerol-3-phosphate dehydrogenase (nad(+)) gpd1, DBP5 - atp-dependent rna helicase dbp5, SEC13 - sec13p, AGE1 - age1p, COS8 - cos8p, YRB30 - yrb30p, EXO84 - exo84p, SVP26 - svp26p, GRH1 - grh1p,…
GO:0051234	establishment of localization	5.81e-08	1.29e-05	1.31	4095	995	914	291	[PHS1 - phs1p, GNP1 - gnp1p, COG6 - cog6p, SEC27 - sec27p, RPS26B - ribosomal 40s subunit protein s26b, NPC2 - npc2p, TIP20 - tip20p, YCK3 - yck3p, GPD1 - glycerol-3-phosphate dehydrogenase (nad(+)) gpd1, VMA4 - vma4p, SEC13 - sec13p, SNA2 - sna2p, AGE1 - age1p, YIP3 - yip3p, PMR1 - ca(2+)/mn(2+)-transporting p-type atpase pmr1, PHO86 - pho86p, COS8 - cos8p, YRB30 - yrb30p, GRH1 - grh1p, ALB1 - a…
GO:0051315	attachment of mitotic spindle microtubules to kinetochore	6.15e-08	1.3e-05	22.75	4095	15	84	7	[NUF2 - nuf2p, MIF2 - mif2p, SPC105 - spc105p, DUO1 - duo1p, DAD3 - dad3p, ASK1 - ask1p, TID3 - tid3p]
GO:0006696	ergosterol biosynthetic process	7.3e-08	1.48e-05	9.07	4095	24	207	11	[ERG4 - delta(24(24(1)))-sterol reductase, ERG11 - sterol 14-demethylase, ERG5 - c-22 sterol desaturase, YMR134W - hypothetical protein, ERG24 - delta(14)-sterol reductase, HMG1 - hydroxymethylglutaryl-coa reductase (nadph) hmg1, ERG1 - squalene monooxygenase, ERG25 - methylsterol monooxygenase, HMG2 - hydroxymethylglutaryl-coa reductase (nadph) hmg2, ERG26 - sterol-4-alpha-carboxylate 3-dehydrog…
GO:0016129	phytosteroid biosynthetic process	7.3e-08	1.42e-05	9.07	4095	24	207	11	[ERG4 - delta(24(24(1)))-sterol reductase, ERG11 - sterol 14-demethylase, ERG5 - c-22 sterol desaturase, YMR134W - hypothetical protein, ERG24 - delta(14)-sterol reductase, HMG1 - hydroxymethylglutaryl-coa reductase (nadph) hmg1, ERG1 - squalene monooxygenase, ERG25 - methylsterol monooxygenase, HMG2 - hydroxymethylglutaryl-coa reductase (nadph) hmg2, NCP1 - ncp1p, ERG26 - sterol-4-alpha-carboxyl…
GO:0044108	cellular alcohol biosynthetic process	7.3e-08	1.37e-05	9.07	4095	24	207	11	[ERG4 - delta(24(24(1)))-sterol reductase, ERG11 - sterol 14-demethylase, ERG5 - c-22 sterol desaturase, YMR134W - hypothetical protein, ERG24 - delta(14)-sterol reductase, HMG1 - hydroxymethylglutaryl-coa reductase (nadph) hmg1, ERG1 - squalene monooxygenase, ERG25 - methylsterol monooxygenase, HMG2 - hydroxymethylglutaryl-coa reductase (nadph) hmg2, NCP1 - ncp1p, ERG26 - sterol-4-alpha-carboxyl…
GO:0097384	cellular lipid biosynthetic process	7.3e-08	1.32e-05	9.07	4095	24	207	11	[ERG4 - delta(24(24(1)))-sterol reductase, ERG11 - sterol 14-demethylase, ERG5 - c-22 sterol desaturase, YMR134W - hypothetical protein, ERG24 - delta(14)-sterol reductase, HMG1 - hydroxymethylglutaryl-coa reductase (nadph) hmg1, ERG1 - squalene monooxygenase, ERG25 - methylsterol monooxygenase, HMG2 - hydroxymethylglutaryl-coa reductase (nadph) hmg2, NCP1 - ncp1p, ERG26 - sterol-4-alpha-carboxyl…
GO:1902653	secondary alcohol biosynthetic process	1.21e-07	2.11e-05	8.7	4095	25	207	11	[ERG11 - sterol 14-demethylase, ERG4 - delta(24(24(1)))-sterol reductase, ERG5 - c-22 sterol desaturase, YMR134W - hypothetical protein, ERG24 - delta(14)-sterol reductase, HMG1 - hydroxymethylglutaryl-coa reductase (nadph) hmg1, ERG1 - squalene monooxygenase, HMG2 - hydroxymethylglutaryl-coa reductase (nadph) hmg2, ERG25 - methylsterol monooxygenase, NCP1 - ncp1p, ERG26 - sterol-4-alpha-carboxyl…
GO:0006810	transport	1.47e-07	2.47e-05	1.32	4095	968	840	263	[PHS1 - phs1p, GNP1 - gnp1p, COG6 - cog6p, SEC27 - sec27p, RPS26B - ribosomal 40s subunit protein s26b, NPC2 - npc2p, TIP20 - tip20p, YCK3 - yck3p, GPD1 - glycerol-3-phosphate dehydrogenase (nad(+)) gpd1, VMA4 - vma4p, SEC13 - sec13p, SNA2 - sna2p, AGE1 - age1p, YIP3 - yip3p, PMR1 - ca(2+)/mn(2+)-transporting p-type atpase pmr1, PHO86 - pho86p, COS8 - cos8p, YRB30 - yrb30p, GRH1 - grh1p, ALB1 - a…
GO:0009247	glycolipid biosynthetic process	1.58e-07	2.57e-05	12.66	4095	26	112	9	[PBN1 - pbn1p, GPI11 - gpi11p, LAS21 - las21p, GPI13 - gpi13p, GPI8 - gpi8p, GPI19 - gpi19p, GPI17 - gpi17p, MCD4 - mcd4p, GAA1 - gaa1p]
GO:0008654	phospholipid biosynthetic process	1.79e-07	2.81e-05	3.14	4095	77	474	28	[GPI19 - gpi19p, GPI17 - gpi17p, OPI3 - opi3p, SLC1 - 1-acylglycerol-3-phosphate o-acyltransferase slc1, SAC1 - phosphatidylinositol-3-phosphatase sac1, GPT2 - bifunctional glycerol-3-phosphate/glycerone-phosphate o-acyltransferase gpt2, SCT1 - bifunctional glycerol-3-phosphate/glycerone-phosphate o-acyltransferase sct1, PBN1 - pbn1p, GUP1 - gup1p, GPI8 - gpi8p, EPT1 - bifunctional diacylglycerol…
GO:0006661	phosphatidylinositol biosynthetic process	1.89e-07	2.88e-05	8.73	4095	30	172	11	[PBN1 - pbn1p, GPI11 - gpi11p, LAS21 - las21p, GPI13 - gpi13p, GPI8 - gpi8p, GPI19 - gpi19p, GPI17 - gpi17p, GPI2 - gpi2p, SAC1 - phosphatidylinositol-3-phosphatase sac1, MCD4 - mcd4p, GAA1 - gaa1p]
GO:0006665	sphingolipid metabolic process	3.25e-07	4.8e-05	6.43	4095	33	251	13	[ORM1 - orm1p, FEN1 - fatty acid elongase fen1, LCB1 - serine c-palmitoyltransferase lcb1, DGA1 - diacylglycerol o-acyltransferase, SUR4 - fatty acid elongase sur4, LAG1 - sphingosine n-acyltransferase lag1, SUR2 - sphingosine hydroxylase, DPL1 - sphinganine-1-phosphate aldolase dpl1, IFA38 - ketoreductase, LCB2 - serine c-palmitoyltransferase lcb2, ELO1 - elo1p, ORM2 - orm2p, LAC1 - sphingosine …
GO:0008204	ergosterol metabolic process	3.36e-07	4.82e-05	8.06	4095	27	207	11	[ERG11 - sterol 14-demethylase, ERG4 - delta(24(24(1)))-sterol reductase, ERG5 - c-22 sterol desaturase, YMR134W - hypothetical protein, ERG24 - delta(14)-sterol reductase, HMG1 - hydroxymethylglutaryl-coa reductase (nadph) hmg1, ERG1 - squalene monooxygenase, HMG2 - hydroxymethylglutaryl-coa reductase (nadph) hmg2, ERG25 - methylsterol monooxygenase, NCP1 - ncp1p, ERG26 - sterol-4-alpha-carboxyl…
GO:0016128	phytosteroid metabolic process	3.36e-07	4.68e-05	8.06	4095	27	207	11	[ERG11 - sterol 14-demethylase, ERG4 - delta(24(24(1)))-sterol reductase, ERG5 - c-22 sterol desaturase, YMR134W - hypothetical protein, ERG24 - delta(14)-sterol reductase, HMG1 - hydroxymethylglutaryl-coa reductase (nadph) hmg1, ERG1 - squalene monooxygenase, HMG2 - hydroxymethylglutaryl-coa reductase (nadph) hmg2, ERG25 - methylsterol monooxygenase, NCP1 - ncp1p, ERG26 - sterol-4-alpha-carboxyl…
GO:0015833	peptide transport	3.4e-07	4.61e-05	1.45	4095	482	929	159	[SEC26 - sec26p, ARL3 - arl3p, NMD3 - nmd3p, SEC27 - sec27p, COG6 - cog6p, SEC65 - sec65p, TIP20 - tip20p, DRS2 - aminophospholipid-translocating p4-type atpase drs2, PHO88 - pho88p, GPD1 - glycerol-3-phosphate dehydrogenase (nad(+)) gpd1, DBP5 - atp-dependent rna helicase dbp5, SEC13 - sec13p, AGE1 - age1p, COS8 - cos8p, YRB30 - yrb30p, EXO84 - exo84p, SVP26 - svp26p, GRH1 - grh1p, VID24 - gluco…
GO:0071459	protein localization to chromosome, centromeric region	3.41e-07	4.5e-05	99.27	4095	15	11	4	[AME1 - ame1p, SPC105 - spc105p, BUB1 - bub1p, TID3 - tid3p]
GO:0006664	glycolipid metabolic process	3.51e-07	4.5e-05	11.75	4095	28	112	9	[PBN1 - pbn1p, GPI11 - gpi11p, LAS21 - las21p, GPI13 - gpi13p, GPI8 - gpi8p, GPI19 - gpi19p, GPI17 - gpi17p, MCD4 - mcd4p, GAA1 - gaa1p]
GO:1903509	liposaccharide metabolic process	3.51e-07	4.39e-05	11.75	4095	28	112	9	[PBN1 - pbn1p, GPI11 - gpi11p, LAS21 - las21p, GPI13 - gpi13p, GPI8 - gpi8p, GPI19 - gpi19p, GPI17 - gpi17p, MCD4 - mcd4p, GAA1 - gaa1p]
GO:0016126	sterol biosynthetic process	3.73e-07	4.55e-05	7.19	4095	33	207	12	[ERG11 - sterol 14-demethylase, ERG4 - delta(24(24(1)))-sterol reductase, ERG5 - c-22 sterol desaturase, YMR134W - hypothetical protein, ERG24 - delta(14)-sterol reductase, HMG1 - hydroxymethylglutaryl-coa reductase (nadph) hmg1, ERG1 - squalene monooxygenase, HMG2 - hydroxymethylglutaryl-coa reductase (nadph) hmg2, NSG2 - nsg2p, ERG25 - methylsterol monooxygenase, NCP1 - ncp1p, ERG26 - sterol-4-…
GO:0015031	protein transport	3.95e-07	4.7e-05	1.45	4095	479	929	158	[SEC26 - sec26p, ARL3 - arl3p, NMD3 - nmd3p, SEC27 - sec27p, COG6 - cog6p, SEC65 - sec65p, TIP20 - tip20p, DRS2 - aminophospholipid-translocating p4-type atpase drs2, PHO88 - pho88p, GPD1 - glycerol-3-phosphate dehydrogenase (nad(+)) gpd1, DBP5 - atp-dependent rna helicase dbp5, SEC13 - sec13p, AGE1 - age1p, COS8 - cos8p, YRB30 - yrb30p, EXO84 - exo84p, SVP26 - svp26p, GRH1 - grh1p, VID24 - gluco…
GO:1902652	secondary alcohol metabolic process	5.21e-07	6.04e-05	7.77	4095	28	207	11	[ERG4 - delta(24(24(1)))-sterol reductase, ERG11 - sterol 14-demethylase, ERG5 - c-22 sterol desaturase, YMR134W - hypothetical protein, ERG24 - delta(14)-sterol reductase, HMG1 - hydroxymethylglutaryl-coa reductase (nadph) hmg1, ERG1 - squalene monooxygenase, HMG2 - hydroxymethylglutaryl-coa reductase (nadph) hmg2, ERG25 - methylsterol monooxygenase, NCP1 - ncp1p, ERG26 - sterol-4-alpha-carboxyl…
GO:0006694	steroid biosynthetic process	5.43e-07	6.15e-05	6.98	4095	34	207	12	[ERG4 - delta(24(24(1)))-sterol reductase, ERG11 - sterol 14-demethylase, ERG5 - c-22 sterol desaturase, YMR134W - hypothetical protein, ERG24 - delta(14)-sterol reductase, HMG1 - hydroxymethylglutaryl-coa reductase (nadph) hmg1, ERG1 - squalene monooxygenase, HMG2 - hydroxymethylglutaryl-coa reductase (nadph) hmg2, NSG2 - nsg2p, ERG25 - methylsterol monooxygenase, NCP1 - ncp1p, ERG26 - sterol-4-…
GO:0051301	cell division	6.1e-07	6.76e-05	7.38	4095	180	37	12	[NUF2 - nuf2p, DSN1 - dsn1p, SPC25 - spc25p, MIF2 - mif2p, SPC24 - spc24p, NKP2 - nkp2p, OKP1 - okp1p, MTW1 - mtw1p, NSL1 - nsl1p, AME1 - ame1p, DAD3 - dad3p, TID3 - tid3p]
GO:0030148	sphingolipid biosynthetic process	6.34e-07	6.87e-05	12.9	4095	20	127	8	[LCB2 - serine c-palmitoyltransferase lcb2, ELO1 - elo1p, FEN1 - fatty acid elongase fen1, LCB1 - serine c-palmitoyltransferase lcb1, SUR4 - fatty acid elongase sur4, LAG1 - sphingosine n-acyltransferase lag1, SUR2 - sphingosine hydroxylase, LAC1 - sphingosine n-acyltransferase lac1]
GO:0042886	amide transport	9.26e-07	9.8e-05	1.44	4095	488	929	159	[SEC26 - sec26p, ARL3 - arl3p, NMD3 - nmd3p, SEC27 - sec27p, COG6 - cog6p, SEC65 - sec65p, TIP20 - tip20p, DRS2 - aminophospholipid-translocating p4-type atpase drs2, PHO88 - pho88p, GPD1 - glycerol-3-phosphate dehydrogenase (nad(+)) gpd1, DBP5 - atp-dependent rna helicase dbp5, SEC13 - sec13p, AGE1 - age1p, COS8 - cos8p, YRB30 - yrb30p, EXO84 - exo84p, SVP26 - svp26p, GRH1 - grh1p, VID24 - gluco…
GO:0007020	microtubule nucleation	9.95e-07	0.000103	38.85	4095	17	31	5	[NUF2 - nuf2p, SPC25 - spc25p, SPC24 - spc24p, SPC105 - spc105p, TID3 - tid3p]
GO:0046907	intracellular transport	1.01e-06	0.000103	1.43	4095	487	932	159	[SEC26 - sec26p, ARL3 - arl3p, NMD3 - nmd3p, SEC27 - sec27p, SEC65 - sec65p, NPC2 - npc2p, RPS26B - ribosomal 40s subunit protein s26b, CTR2 - ctr2p, DRS2 - aminophospholipid-translocating p4-type atpase drs2, PHO88 - pho88p, GPD1 - glycerol-3-phosphate dehydrogenase (nad(+)) gpd1, DBP5 - atp-dependent rna helicase dbp5, SNA2 - sna2p, AGE1 - age1p, YIP3 - yip3p, AIM21 - aim21p, COS8 - cos8p, PHO8…
GO:0044107	cellular alcohol metabolic process	1.22e-06	0.000121	7.25	4095	30	207	11	[ERG11 - sterol 14-demethylase, ERG4 - delta(24(24(1)))-sterol reductase, ERG5 - c-22 sterol desaturase, YMR134W - hypothetical protein, ERG24 - delta(14)-sterol reductase, HMG1 - hydroxymethylglutaryl-coa reductase (nadph) hmg1, ERG1 - squalene monooxygenase, HMG2 - hydroxymethylglutaryl-coa reductase (nadph) hmg2, ERG25 - methylsterol monooxygenase, NCP1 - ncp1p, ERG26 - sterol-4-alpha-carboxyl…
GO:0006633	fatty acid biosynthetic process	1.45e-06	0.000142	7.71	4095	21	253	10	[ELO1 - elo1p, FEN1 - fatty acid elongase fen1, OLE1 - stearoyl-coa 9-desaturase, SUR4 - fatty acid elongase sur4, FAS2 - trifunctional fatty acid synthase subunit fas2, FAS1 - tetrafunctional fatty acid synthase subunit fas1, TSC13 - trans-2-enoyl-coa reductase (nadph) tsc13, IFA38 - ketoreductase, EHT1 - eht1p, ACC1 - acetyl-coa carboxylase acc1]
GO:0006650	glycerophospholipid metabolic process	1.69e-06	0.000162	3.65	4095	79	298	21	[LAS21 - las21p, GPI13 - gpi13p, GPI19 - gpi19p, GPI17 - gpi17p, OPI3 - opi3p, PER1 - per1p, SLC1 - 1-acylglycerol-3-phosphate o-acyltransferase slc1, SAC1 - phosphatidylinositol-3-phosphatase sac1, SCT1 - bifunctional glycerol-3-phosphate/glycerone-phosphate o-acyltransferase sct1, GPT2 - bifunctional glycerol-3-phosphate/glycerone-phosphate o-acyltransferase gpt2, PBN1 - pbn1p, GPI11 - gpi11p, …
GO:0046486	glycerolipid metabolic process	2.29e-06	0.000215	3.47	4095	87	298	22	[LAS21 - las21p, DGA1 - diacylglycerol o-acyltransferase, GPI13 - gpi13p, GPI19 - gpi19p, GPI17 - gpi17p, OPI3 - opi3p, PER1 - per1p, SLC1 - 1-acylglycerol-3-phosphate o-acyltransferase slc1, SAC1 - phosphatidylinositol-3-phosphatase sac1, SCT1 - bifunctional glycerol-3-phosphate/glycerone-phosphate o-acyltransferase sct1, GPT2 - bifunctional glycerol-3-phosphate/glycerone-phosphate o-acyltransfe…
GO:0016255	attachment of GPI anchor to protein	2.48e-06	0.000228	87.13	4095	3	47	3	[GPI8 - gpi8p, GPI17 - gpi17p, GAA1 - gaa1p]
GO:0071705	nitrogen compound transport	2.8e-06	0.000253	1.36	4095	623	932	193	[SEC27 - sec27p, COG6 - cog6p, GNP1 - gnp1p, RPS26B - ribosomal 40s subunit protein s26b, TIP20 - tip20p, GPD1 - glycerol-3-phosphate dehydrogenase (nad(+)) gpd1, SEC13 - sec13p, AGE1 - age1p, COS8 - cos8p, YRB30 - yrb30p, GRH1 - grh1p, COG5 - cog5p, PBS2 - pbs2p, FAA1 - long-chain fatty acid-coa ligase faa1, COG3 - cog3p, LDB19 - ldb19p, AGP1 - agp1p, MYO2 - myosin 2, RPB4 - rpb4p, ERP3 - erp3p,…
GO:0031134	sister chromatid biorientation	3.62e-06	0.00032	18.28	4095	16	84	6	[RTS1 - rts1p, SPC105 - spc105p, DUO1 - duo1p, DAD3 - dad3p, ASK1 - ask1p, BUB1 - bub1p]
GO:0034502	protein localization to chromosome	3.75e-06	0.000327	14.35	4095	27	74	7	[MCM21 - mcm21p, RTS1 - rts1p, MTW1 - mtw1p, AME1 - ame1p, SPC105 - spc105p, BUB1 - bub1p, TID3 - tid3p]
GO:0007030	Golgi organization	4.04e-06	0.000345	4.09	4095	22	637	14	[ERP5 - erp5p, SEC16 - sec16p, COG3 - cog3p, MYO2 - myosin 2, ERP3 - erp3p, EMP47 - emp47p, ERV25 - erv25p, EMP24 - emp24p, ERP4 - erp4p, RET2 - ret2p, ERP2 - erp2p, GRH1 - grh1p, ERP1 - erp1p, COG1 - cog1p]
GO:0032581	ER-dependent peroxisome organization	4.61e-06	0.000388	6.67	4095	9	546	8	[RTN2 - rtn2p, DSL1 - dsl1p, SEC39 - sec39p, PEX3 - pex3p, PEX29 - pex29p, YOP1 - yop1p, PEX19 - pex19p, PEX30 - pex30p]
GO:0051649	establishment of localization in cell	4.77e-06	0.000394	1.4	4095	505	932	161	[SEC26 - sec26p, ARL3 - arl3p, NMD3 - nmd3p, SEC27 - sec27p, SEC65 - sec65p, NPC2 - npc2p, RPS26B - ribosomal 40s subunit protein s26b, CTR2 - ctr2p, DRS2 - aminophospholipid-translocating p4-type atpase drs2, PHO88 - pho88p, GPD1 - glycerol-3-phosphate dehydrogenase (nad(+)) gpd1, DBP5 - atp-dependent rna helicase dbp5, SNA2 - sna2p, AGE1 - age1p, YIP3 - yip3p, AIM21 - aim21p, COS8 - cos8p, PHO8…
GO:0000226	microtubule cytoskeleton organization	9.55e-06	0.000776	13.16	4095	66	33	7	[NUF2 - nuf2p, SPC25 - spc25p, MIF2 - mif2p, KIP3 - tubulin-dependent atpase kip3, SPC24 - spc24p, SPC105 - spc105p, TID3 - tid3p]
GO:0042761	very long-chain fatty acid biosynthetic process	9.66e-06	0.000772	15.95	4095	6	214	5	[ELO1 - elo1p, FEN1 - fatty acid elongase fen1, SUR4 - fatty acid elongase sur4, TSC13 - trans-2-enoyl-coa reductase (nadph) tsc13, IFA38 - ketoreductase]
GO:0016125	sterol metabolic process	1e-05	0.000787	5.52	4095	43	207	12	[ERG4 - delta(24(24(1)))-sterol reductase, ERG11 - sterol 14-demethylase, ERG5 - c-22 sterol desaturase, YMR134W - hypothetical protein, ERG24 - delta(14)-sterol reductase, HMG1 - hydroxymethylglutaryl-coa reductase (nadph) hmg1, ERG1 - squalene monooxygenase, HMG2 - hydroxymethylglutaryl-coa reductase (nadph) hmg2, NSG2 - nsg2p, ERG25 - methylsterol monooxygenase, NCP1 - ncp1p, ERG26 - sterol-4-…
GO:0007049	cell cycle	1e-05	0.000776	4.84	4095	297	37	13	[DSN1 - dsn1p, SPC25 - spc25p, MIF2 - mif2p, MTW1 - mtw1p, DAD3 - dad3p, BUB1 - bub1p, TID3 - tid3p, NUF2 - nuf2p, SPC24 - spc24p, NKP2 - nkp2p, OKP1 - okp1p, NSL1 - nsl1p, AME1 - ame1p]
GO:0034625	fatty acid elongation, monounsaturated fatty acid	1.14e-05	0.000869	53.88	4095	3	76	3	[ELO1 - elo1p, FEN1 - fatty acid elongase fen1, SUR4 - fatty acid elongase sur4]
GO:0034626	fatty acid elongation, polyunsaturated fatty acid	1.14e-05	0.000856	53.88	4095	3	76	3	[ELO1 - elo1p, FEN1 - fatty acid elongase fen1, SUR4 - fatty acid elongase sur4]
GO:0019367	fatty acid elongation, saturated fatty acid	1.14e-05	0.000843	53.88	4095	3	76	3	[ELO1 - elo1p, FEN1 - fatty acid elongase fen1, SUR4 - fatty acid elongase sur4]
GO:0019368	fatty acid elongation, unsaturated fatty acid	1.14e-05	0.00083	53.88	4095	3	76	3	[ELO1 - elo1p, FEN1 - fatty acid elongase fen1, SUR4 - fatty acid elongase sur4]
GO:0071702	organic substance transport	1.21e-05	0.000865	1.32	4095	677	932	204	[SEC27 - sec27p, GNP1 - gnp1p, COG6 - cog6p, NPC2 - npc2p, RPS26B - ribosomal 40s subunit protein s26b, TIP20 - tip20p, GPD1 - glycerol-3-phosphate dehydrogenase (nad(+)) gpd1, SEC13 - sec13p, AGE1 - age1p, COS8 - cos8p, YRB30 - yrb30p, GRH1 - grh1p, COG5 - cog5p, PBS2 - pbs2p, FAA1 - long-chain fatty acid-coa ligase faa1, COG3 - cog3p, LDB19 - ldb19p, AGP1 - agp1p, UPS2 - ups2p, MYO2 - myosin 2,…
GO:0008202	steroid metabolic process	1.32e-05	0.000934	5.4	4095	44	207	12	[ERG11 - sterol 14-demethylase, ERG4 - delta(24(24(1)))-sterol reductase, ERG5 - c-22 sterol desaturase, YMR134W - hypothetical protein, ERG24 - delta(14)-sterol reductase, HMG1 - hydroxymethylglutaryl-coa reductase (nadph) hmg1, ERG1 - squalene monooxygenase, NSG2 - nsg2p, HMG2 - hydroxymethylglutaryl-coa reductase (nadph) hmg2, ERG25 - methylsterol monooxygenase, NCP1 - ncp1p, ERG26 - sterol-4-…
GO:0006672	ceramide metabolic process	1.93e-05	0.00134	13.6	4095	6	251	5	[ORM1 - orm1p, DGA1 - diacylglycerol o-acyltransferase, ORM2 - orm2p, LAG1 - sphingosine n-acyltransferase lag1, LAC1 - sphingosine n-acyltransferase lac1]
GO:0006890	retrograde vesicle-mediated transport, Golgi to ER	2.04e-05	0.0014	5.48	4095	31	265	11	[YOL107W - hypothetical protein, COP1 - cop1p, SEC26 - sec26p, SEC21 - sec21p, SEC27 - sec27p, DSL1 - dsl1p, SEC39 - sec39p, RET2 - ret2p, GET1 - get1p, TIP20 - tip20p, SEC28 - sec28p]
GO:0046488	phosphatidylinositol metabolic process	2.04e-05	0.00138	5.82	4095	45	172	11	[PBN1 - pbn1p, GPI11 - gpi11p, LAS21 - las21p, GPI13 - gpi13p, GPI8 - gpi8p, GPI19 - gpi19p, GPI17 - gpi17p, GPI2 - gpi2p, SAC1 - phosphatidylinositol-3-phosphatase sac1, MCD4 - mcd4p, GAA1 - gaa1p]
GO:0046165	alcohol biosynthetic process	2.34e-05	0.00156	5.16	4095	46	207	12	[ERG11 - sterol 14-demethylase, ERG4 - delta(24(24(1)))-sterol reductase, ERG5 - c-22 sterol desaturase, YMR134W - hypothetical protein, ERG24 - delta(14)-sterol reductase, HMG1 - hydroxymethylglutaryl-coa reductase (nadph) hmg1, ERG1 - squalene monooxygenase, FOL2 - gtp cyclohydrolase i, HMG2 - hydroxymethylglutaryl-coa reductase (nadph) hmg2, ERG25 - methylsterol monooxygenase, NCP1 - ncp1p, ER…
GO:0000038	very long-chain fatty acid metabolic process	3.46e-05	0.00228	13.67	4095	7	214	5	[ELO1 - elo1p, FEN1 - fatty acid elongase fen1, SUR4 - fatty acid elongase sur4, TSC13 - trans-2-enoyl-coa reductase (nadph) tsc13, IFA38 - ketoreductase]
GO:0007029	endoplasmic reticulum organization	3.9e-05	0.00253	3.41	4095	28	643	15	[SEC16 - sec16p, RTN2 - rtn2p, SHE3 - she3p, LNP1 - lnp1p, MYO4 - myosin 4, POM33 - pom33p, PER33 - per33p, SHS1 - septin shs1, EMP47 - emp47p, YGR026W - hypothetical protein, YOP1 - yop1p, SEC31 - sec31p, ICE2 - ice2p, DOP1 - dop1p, SEY1 - sey1p]
GO:0070972	protein localization to endoplasmic reticulum	4.32e-05	0.00277	4.42	4095	28	397	12	[SEC16 - sec16p, PHO88 - pho88p, SRP68 - srp68p, SRP14 - srp14p, SEC65 - sec65p, SPC2 - spc2p, YET3 - yet3p, SRP102 - srp102p, SEC11 - sec11p, SEC63 - sec63p, SPC1 - spc1p, SRP72 - srp72p]
GO:0051383	kinetochore organization	4.82e-05	0.00305	28.24	4095	10	58	4	[NUF2 - nuf2p, MIF2 - mif2p, MTW1 - mtw1p, CSE4 - cse4p]
GO:0006644	phospholipid metabolic process	5.26e-05	0.00328	2.38	4095	109	474	30	[GPI19 - gpi19p, GPI17 - gpi17p, OPI3 - opi3p, SLC1 - 1-acylglycerol-3-phosphate o-acyltransferase slc1, SAC1 - phosphatidylinositol-3-phosphatase sac1, GPT2 - bifunctional glycerol-3-phosphate/glycerone-phosphate o-acyltransferase gpt2, SCT1 - bifunctional glycerol-3-phosphate/glycerone-phosphate o-acyltransferase sct1, PBN1 - pbn1p, GUP1 - gup1p, GPI8 - gpi8p, EPT1 - bifunctional diacylglycerol…
GO:1901617	organic hydroxy compound biosynthetic process	8.21e-05	0.00506	4.29	4095	60	207	13	[YMR134W - hypothetical protein, HMG1 - hydroxymethylglutaryl-coa reductase (nadph) hmg1, NSG2 - nsg2p, HMG2 - hydroxymethylglutaryl-coa reductase (nadph) hmg2, ERG4 - delta(24(24(1)))-sterol reductase, ERG11 - sterol 14-demethylase, ERG5 - c-22 sterol desaturase, ERG24 - delta(14)-sterol reductase, FOL2 - gtp cyclohydrolase i, ERG1 - squalene monooxygenase, ERG25 - methylsterol monooxygenase, ER…
GO:0006614	SRP-dependent cotranslational protein targeting to membrane	0.000101	0.00616	7.74	4095	8	397	6	[SRP68 - srp68p, SRP14 - srp14p, SEC65 - sec65p, SRP102 - srp102p, SEC63 - sec63p, SRP72 - srp72p]
GO:0006066	alcohol metabolic process	0.000105	0.00629	3.71	4095	72	230	15	[DGA1 - diacylglycerol o-acyltransferase, YMR134W - hypothetical protein, HMG1 - hydroxymethylglutaryl-coa reductase (nadph) hmg1, HMG2 - hydroxymethylglutaryl-coa reductase (nadph) hmg2, ERG4 - delta(24(24(1)))-sterol reductase, ERG11 - sterol 14-demethylase, ERG5 - c-22 sterol desaturase, GUP1 - gup1p, NDE1 - nadh-ubiquinone reductase (h(+)-translocating) nde1, ERG24 - delta(14)-sterol reductas…
GO:0000070	mitotic sister chromatid segregation	0.000105	0.00624	8.6	4095	28	119	7	[DSN1 - dsn1p, KIP3 - tubulin-dependent atpase kip3, MTW1 - mtw1p, CSE4 - cse4p, NSL1 - nsl1p, BRN1 - brn1p, YCG1 - ycg1p]
GO:0007017	microtubule-based process	0.000108	0.00633	9.24	4095	94	33	7	[NUF2 - nuf2p, SPC25 - spc25p, MIF2 - mif2p, KIP3 - tubulin-dependent atpase kip3, SPC24 - spc24p, SPC105 - spc105p, TID3 - tid3p]
GO:0031113	regulation of microtubule polymerization	0.000112	0.00647	13.65	4095	12	125	5	[KIP3 - tubulin-dependent atpase kip3, DUO1 - duo1p, DAD3 - dad3p, ASK1 - ask1p, BIM1 - bim1p]
GO:1990758	mitotic sister chromatid biorientation	0.000112	0.00643	21.67	4095	9	84	4	[SPC105 - spc105p, DAD3 - dad3p, DUO1 - duo1p, ASK1 - ask1p]
GO:0016197	endosomal transport	0.000128	0.00726	2.05	4095	97	721	35	[VPS68 - vps68p, SEC27 - sec27p, DID4 - did4p, GGA2 - gga2p, SNA4 - sna4p, GGA1 - gga1p, VPS54 - vps54p, CHC1 - chc1p, DRS2 - aminophospholipid-translocating p4-type atpase drs2, SEC28 - sec28p, TDA3 - tda3p, SNA2 - sna2p, VPS45 - vps45p, SNF7 - snf7p, RAV1 - rav1p, COS8 - cos8p, DOP1 - dop1p, TCA17 - tca17p, PEP8 - pep8p, RCY1 - rcy1p, BRO1 - bro1p, FEN1 - fatty acid elongase fen1, EMP70 - emp70…
GO:0030497	fatty acid elongation	0.000129	0.0072	15.31	4095	5	214	4	[ELO1 - elo1p, FEN1 - fatty acid elongase fen1, SUR4 - fatty acid elongase sur4, IFA38 - ketoreductase]
GO:0006891	intra-Golgi vesicle-mediated transport	0.00013	0.00719	2.67	4095	32	862	18	[SEC7 - sec7p, SEC26 - sec26p, ARL3 - arl3p, SEC21 - sec21p, COG8 - cog8p, COY1 - coy1p, SEC27 - sec27p, COG6 - cog6p, COG3 - cog3p, AGE2 - age2p, SEC28 - sec28p, COP1 - cop1p, SEC18 - sec18p, AGE1 - age1p, IRE1 - ire1p, SYS1 - sys1p, COG1 - cog1p, COG5 - cog5p]
GO:0071786	endoplasmic reticulum tubular network organization	0.000173	0.00944	6.43	4095	7	546	6	[PER33 - per33p, RTN2 - rtn2p, YGR026W - hypothetical protein, YOP1 - yop1p, LNP1 - lnp1p, POM33 - pom33p]
GO:0055082	cellular chemical homeostasis	0.000221	0.012	1.94	4095	124	663	39	[AFT2 - aft2p, ORM1 - orm1p, VCX1 - vcx1p, HAA1 - haa1p, VMA16 - vma16p, CTR2 - ctr2p, YMR134W - hypothetical protein, PFK2 - 6-phosphofructokinase subunit beta, MNR2 - putative mg(2+) transporter mnr2, VPS54 - vps54p, STV1 - stv1p, YPK9 - ypk9p, VMA8 - vma8p, HRK1 - hrk1p, NHX1 - nhx1p, VMA4 - vma4p, ORM2 - orm2p, MAC1 - mac1p, VPS45 - vps45p, PMR1 - ca(2+)/mn(2+)-transporting p-type atpase pmr1…
GO:0006487	protein N-linked glycosylation	0.000226	0.0121	6.19	4095	27	196	8	[SWP1 - swp1p, ALG1 - chitobiosyldiphosphodolichol beta-1,4 mannosyltransferase, CAX4 - cax4p, ALG6 - dolichyl-p-glc:man(9)glcnac(2)-pp-dolichol alpha-1,3-glucosyltransferase, ALG5 - dolichyl-phosphate beta-glucosyltransferase, OST1 - ost1p, WBP1 - wbp1p, OST4 - ost4p]
GO:0034032	purine nucleoside bisphosphate metabolic process	0.00025	0.0133	170.62	4095	8	6	2	[HMG1 - hydroxymethylglutaryl-coa reductase (nadph) hmg1, HMG2 - hydroxymethylglutaryl-coa reductase (nadph) hmg2]
GO:0015936	coenzyme A metabolic process	0.00025	0.0131	170.62	4095	8	6	2	[HMG1 - hydroxymethylglutaryl-coa reductase (nadph) hmg1, HMG2 - hydroxymethylglutaryl-coa reductase (nadph) hmg2]
GO:0033865	nucleoside bisphosphate metabolic process	0.00025	0.013	170.62	4095	8	6	2	[HMG1 - hydroxymethylglutaryl-coa reductase (nadph) hmg1, HMG2 - hydroxymethylglutaryl-coa reductase (nadph) hmg2]
GO:0033875	ribonucleoside bisphosphate metabolic process	0.00025	0.0128	170.62	4095	8	6	2	[HMG1 - hydroxymethylglutaryl-coa reductase (nadph) hmg1, HMG2 - hydroxymethylglutaryl-coa reductase (nadph) hmg2]
GO:0098813	nuclear chromosome segregation	0.000275	0.014	6.4	4095	43	119	8	[DSN1 - dsn1p, NUF2 - nuf2p, KIP3 - tubulin-dependent atpase kip3, MTW1 - mtw1p, CSE4 - cse4p, NSL1 - nsl1p, BRN1 - brn1p, YCG1 - ycg1p]
GO:0031110	regulation of microtubule polymerization or depolymerization	0.000284	0.0143	11.7	4095	14	125	5	[KIP3 - tubulin-dependent atpase kip3, DUO1 - duo1p, DAD3 - dad3p, ASK1 - ask1p, BIM1 - bim1p]
GO:0006613	cotranslational protein targeting to membrane	0.0003	0.0149	6.88	4095	9	397	6	[SRP68 - srp68p, SRP14 - srp14p, SEC65 - sec65p, SRP102 - srp102p, SEC63 - sec63p, SRP72 - srp72p]
GO:0042759	long-chain fatty acid biosynthetic process	0.0003	0.0148	18.53	4095	3	221	3	[FAS2 - trifunctional fatty acid synthase subunit fas2, FAS1 - tetrafunctional fatty acid synthase subunit fas1, ACC1 - acetyl-coa carboxylase acc1]
GO:0002181	cytoplasmic translation	0.00031	0.0151	1.72	4095	115	992	48	[RPS27B - ribosomal 40s subunit protein s27b, RPS1B - ribosomal 40s subunit protein s1b, RPS0B - ribosomal 40s subunit protein s0b, RPP1B - ribosomal protein p1b, RPL21A - ribosomal 60s subunit protein l21a, TMA19 - tma19p, RPL24A - ribosomal 60s subunit protein l24a, RPL14A - ribosomal 60s subunit protein l14a, RPS26B - ribosomal 40s subunit protein s26b, SLH1 - slh1p, TIF3 - tif3p, RPL36A - rib…
GO:0045047	protein targeting to ER	0.000337	0.0162	4.3	4095	24	397	10	[PHO88 - pho88p, SRP68 - srp68p, SRP14 - srp14p, SEC65 - sec65p, SPC2 - spc2p, SRP102 - srp102p, SEC63 - sec63p, SEC11 - sec11p, SPC1 - spc1p, SRP72 - srp72p]
GO:0046513	ceramide biosynthetic process	0.000401	0.0191	78	4095	3	35	2	[LAG1 - sphingosine n-acyltransferase lag1, LAC1 - sphingosine n-acyltransferase lac1]
GO:0000819	sister chromatid segregation	0.000424	0.02	4.45	4095	35	263	10	[DSN1 - dsn1p, KIP3 - tubulin-dependent atpase kip3, MTW1 - mtw1p, CSE4 - cse4p, NSL1 - nsl1p, CIN8 - cin8p, BRN1 - brn1p, YCG1 - ycg1p, IPL1 - ipl1p, SMC1 - cohesin subunit smc1]
GO:1902903	regulation of supramolecular fiber organization	0.000484	0.0227	2.58	4095	51	592	19	[LSB1 - lsb1p, KIP3 - tubulin-dependent atpase kip3, KEL2 - kel2p, HOF1 - hof1p, DAD3 - dad3p, LAS17 - las17p, ARC40 - arc40p, BBC1 - bbc1p, KEL1 - kel1p, SLA1 - sla1p, DAD1 - dad1p, ARC35 - arc35p, CRN1 - crn1p, DUO1 - duo1p, ARC15 - arc15p, SRV2 - srv2p, ASK1 - ask1p, BIM1 - bim1p, DAD2 - dad2p]
GO:0006886	intracellular protein transport	0.000494	0.0229	1.44	4095	279	929	91	[SEC26 - sec26p, ARL3 - arl3p, SRP68 - srp68p, NMD3 - nmd3p, PEP1 - pep1p, SEC27 - sec27p, SEC65 - sec65p, APL1 - apl1p, BCP1 - bcp1p, GGA1 - gga1p, SPC1 - spc1p, DRS2 - aminophospholipid-translocating p4-type atpase drs2, LHS1 - hsp70 family chaperone lhs1, GPD1 - glycerol-3-phosphate dehydrogenase (nad(+)) gpd1, PHO88 - pho88p, NUG1 - nug1p, PEX3 - pex3p, ARX1 - arx1p, SEC31 - sec31p, COS8 - co…
GO:0001676	long-chain fatty acid metabolic process	0.000496	0.0228	12.35	4095	6	221	4	[FAA1 - long-chain fatty acid-coa ligase faa1, FAS2 - trifunctional fatty acid synthase subunit fas2, FAS1 - tetrafunctional fatty acid synthase subunit fas1, ACC1 - acetyl-coa carboxylase acc1]
GO:0034622	cellular macromolecular complex assembly	0.000497	0.0226	1.34	4095	403	992	131	[SEC65 - sec65p, RPS26B - ribosomal 40s subunit protein s26b, MTW1 - mtw1p, COX20 - cox20p, CIN4 - cin4p, HIR2 - hir2p, VOA1 - voa1p, DRS2 - aminophospholipid-translocating p4-type atpase drs2, NAS2 - nas2p, MRPS18 - mitochondrial 37s ribosomal protein yms18, URC2 - urc2p, PKR1 - pkr1p, RPS19B - ribosomal 40s subunit protein s19b, EXO84 - exo84p, SGT1 - sgt1p, NOB1 - nob1p, RSM7 - rsm7p, MED2 - m…
GO:0072599	establishment of protein localization to endoplasmic reticulum	0.000506	0.0228	4.13	4095	25	397	10	[PHO88 - pho88p, SRP68 - srp68p, SRP14 - srp14p, SEC65 - sec65p, SPC2 - spc2p, SRP102 - srp102p, SEC11 - sec11p, SEC63 - sec63p, SPC1 - spc1p, SRP72 - srp72p]
GO:0006631	fatty acid metabolic process	0.000529	0.0236	4.05	4095	44	253	11	[ELO1 - elo1p, FEN1 - fatty acid elongase fen1, FAA1 - long-chain fatty acid-coa ligase faa1, OLE1 - stearoyl-coa 9-desaturase, SUR4 - fatty acid elongase sur4, FAS2 - trifunctional fatty acid synthase subunit fas2, FAS1 - tetrafunctional fatty acid synthase subunit fas1, TSC13 - trans-2-enoyl-coa reductase (nadph) tsc13, IFA38 - ketoreductase, ACC1 - acetyl-coa carboxylase acc1, EHT1 - eht1p]
GO:0022402	cell cycle process	0.00054	0.0239	3.39	4095	425	37	13	[DSN1 - dsn1p, KIP3 - tubulin-dependent atpase kip3, MIF2 - mif2p, MTW1 - mtw1p, DAD3 - dad3p, BUB1 - bub1p, TID3 - tid3p, NUF2 - nuf2p, MSC7 - msc7p, OKP1 - okp1p, NSL1 - nsl1p, AME1 - ame1p, SPC105 - spc105p]
GO:0006616	SRP-dependent cotranslational protein targeting to membrane, translocation	0.000568	0.0249	34.12	4095	15	24	3	[SRP14 - srp14p, SRP21 - srp21p, SRP72 - srp72p]
GO:0070072	vacuolar proton-transporting V-type ATPase complex assembly	0.000569	0.0248	5.67	4095	8	542	6	[VPH2 - vph2p, RAV1 - rav1p, PKR1 - pkr1p, PFK2 - 6-phosphofructokinase subunit beta, STV1 - stv1p, VMA22 - vma22p]
GO:0070070	proton-transporting V-type ATPase complex assembly	0.000569	0.0245	5.67	4095	8	542	6	[VPH2 - vph2p, RAV1 - rav1p, PFK2 - 6-phosphofructokinase subunit beta, PKR1 - pkr1p, STV1 - stv1p, VMA22 - vma22p]
GO:0032509	endosome transport via multivesicular body sorting pathway	0.000581	0.0248	2.61	4095	37	721	17	[VPS68 - vps68p, BRO1 - bro1p, FEN1 - fatty acid elongase fen1, SEC27 - sec27p, VPS55 - vps55p, GGA2 - gga2p, SUR4 - fatty acid elongase sur4, SNA4 - sna4p, GGA1 - gga1p, EAR1 - ear1p, SEC28 - sec28p, VPS60 - vps60p, VPS28 - vps28p, SNA3 - sna3p, COS6 - cos6p, SNA2 - sna2p, COS8 - cos8p]
GO:0071985	multivesicular body sorting pathway	0.000581	0.0246	2.61	4095	37	721	17	[VPS68 - vps68p, BRO1 - bro1p, FEN1 - fatty acid elongase fen1, SEC27 - sec27p, VPS55 - vps55p, GGA2 - gga2p, SUR4 - fatty acid elongase sur4, SNA4 - sna4p, GGA1 - gga1p, EAR1 - ear1p, SEC28 - sec28p, VPS60 - vps60p, VPS28 - vps28p, SNA3 - sna3p, COS6 - cos6p, SNA2 - sna2p, COS8 - cos8p]
GO:0030003	cellular cation homeostasis	0.000622	0.0261	2	4095	99	663	32	[AFT2 - aft2p, VCX1 - vcx1p, HAA1 - haa1p, VMA16 - vma16p, CTR2 - ctr2p, YMR134W - hypothetical protein, MNR2 - putative mg(2+) transporter mnr2, PFK2 - 6-phosphofructokinase subunit beta, STV1 - stv1p, YPK9 - ypk9p, VMA8 - vma8p, NHX1 - nhx1p, VMA4 - vma4p, MAC1 - mac1p, VPS45 - vps45p, PMR1 - ca(2+)/mn(2+)-transporting p-type atpase pmr1, RAV1 - rav1p, IZH3 - izh3p, PFK1 - 6-phosphofructokinase…
GO:0051382	kinetochore assembly	0.00071	0.0296	26.48	4095	8	58	3	[MIF2 - mif2p, MTW1 - mtw1p, CSE4 - cse4p]
GO:0065005	protein-lipid complex assembly	0.000783	0.0323	13.38	4095	3	306	3	[VPS1 - vps1p, RVS167 - rvs167p, RVS161 - rvs161p]
GO:0060988	lipid tube assembly	0.000783	0.0321	13.38	4095	3	306	3	[VPS1 - vps1p, RVS167 - rvs167p, RVS161 - rvs161p]
GO:0048878	chemical homeostasis	0.000793	0.0322	1.8	4095	144	663	42	[AFT2 - aft2p, ORM1 - orm1p, VCX1 - vcx1p, HAA1 - haa1p, VMA16 - vma16p, YMR134W - hypothetical protein, CTR2 - ctr2p, PFK2 - 6-phosphofructokinase subunit beta, MNR2 - putative mg(2+) transporter mnr2, STV1 - stv1p, VPS54 - vps54p, YPK9 - ypk9p, VMA8 - vma8p, NHX1 - nhx1p, HRK1 - hrk1p, VMA4 - vma4p, ORM2 - orm2p, MAC1 - mac1p, VPS45 - vps45p, PMR1 - ca(2+)/mn(2+)-transporting p-type atpase pmr1…
GO:0051316	attachment of spindle microtubules to kinetochore involved in meiotic chromosome segregation	0.000797	0.0321	81.9	4095	5	20	2	[DSN1 - dsn1p, MIF2 - mif2p]
GO:0051455	attachment of spindle microtubules to kinetochore involved in homologous chromosome segregation	0.000797	0.0318	81.9	4095	5	20	2	[DSN1 - dsn1p, MIF2 - mif2p]
GO:1903047	mitotic cell cycle process	0.000809	0.032	3.01	4095	276	74	15	[DSN1 - dsn1p, MCM21 - mcm21p, KIP3 - tubulin-dependent atpase kip3, MIF2 - mif2p, MTW1 - mtw1p, MYO2 - myosin 2, DAD3 - dad3p, BUB1 - bub1p, TID3 - tid3p, NUF2 - nuf2p, RTS1 - rts1p, CSE4 - cse4p, NSL1 - nsl1p, SPC105 - spc105p, ASK1 - ask1p]
GO:0031116	positive regulation of microtubule polymerization	0.000859	0.0337	13.1	4095	10	125	4	[DAD3 - dad3p, DUO1 - duo1p, ASK1 - ask1p, BIM1 - bim1p]
GO:0031112	positive regulation of microtubule polymerization or depolymerization	0.000859	0.0335	13.1	4095	10	125	4	[DUO1 - duo1p, DAD3 - dad3p, ASK1 - ask1p, BIM1 - bim1p]
GO:0098771	inorganic ion homeostasis	0.000886	0.0343	2	4095	104	609	31	[AFT2 - aft2p, VCX1 - vcx1p, HAA1 - haa1p, VMA16 - vma16p, CTR2 - ctr2p, YMR134W - hypothetical protein, MNR2 - putative mg(2+) transporter mnr2, PFK2 - 6-phosphofructokinase subunit beta, STV1 - stv1p, YPK9 - ypk9p, VMA8 - vma8p, NHX1 - nhx1p, VMA4 - vma4p, MAC1 - mac1p, VPS45 - vps45p, PMR1 - ca(2+)/mn(2+)-transporting p-type atpase pmr1, RAV1 - rav1p, IZH3 - izh3p, PFK1 - 6-phosphofructokinase…
GO:0008299	isoprenoid biosynthetic process	0.000898	0.0344	105	4095	13	6	2	[HMG1 - hydroxymethylglutaryl-coa reductase (nadph) hmg1, HMG2 - hydroxymethylglutaryl-coa reductase (nadph) hmg2]
GO:0000028	ribosomal small subunit assembly	0.00094	0.0358	2.68	4095	20	992	13	[RPS27B - ribosomal 40s subunit protein s27b, RPS0B - ribosomal 40s subunit protein s0b, RSM7 - rsm7p, RPS19A - ribosomal 40s subunit protein s19a, RRP7 - rrp7p, RPS28B - ribosomal 40s subunit protein s28b, RPS10B - ribosomal 40s subunit protein s10b, DRS2 - aminophospholipid-translocating p4-type atpase drs2, NSR1 - nsr1p, MRPS18 - mitochondrial 37s ribosomal protein yms18, RPS17B - ribosomal 40…
GO:0043623	cellular protein complex assembly	0.000955	0.0361	1.63	4095	175	790	55	[TRS20 - trs20p, SEC65 - sec65p, COX20 - cox20p, MTW1 - mtw1p, CIN4 - cin4p, VOA1 - voa1p, STU2 - stu2p, RAV1 - rav1p, PKR1 - pkr1p, EXO84 - exo84p, RPN10 - proteasome regulatory particle base subunit rpn10, CBF2 - cbf2p, POM33 - pom33p, VMA22 - vma22p, YIR024C - hypothetical protein, PER33 - per33p, COA1 - coa1p, YGR026W - hypothetical protein, PRE4 - proteasome core particle subunit beta 7, SEM…

## Sheet: Spc110N Component
GO Term	Description	P-value	FDR q-value	Enrichment	N	B	n	b	Genes
GO:0005783	endoplasmic reticulum	2.78e-48	2.8e-45	4.11	4095	476	253	121	[LEM3 - lem3p, SNL1 - snl1p, SHE3 - she3p, YMR134W - hypothetical protein, CUE4 - cue4p, TIP20 - tip20p, GPT2 - bifunctional glycerol-3-phosphate/glycerone-phosphate o-acyltransferase gpt2, ERJ5 - erj5p, PBN1 - pbn1p, PHO88 - pho88p, ALG1 - chitobiosyldiphosphodolichol beta-1,4 mannosyltransferase, EMC1 - emc1p, PKR1 - pkr1p, PHO86 - pho86p, ALG11 - alpha-1,2-mannosyltransferase alg11, SEC21 - se…
GO:0044432	endoplasmic reticulum part	2.99e-44	1.5e-41	4.91	4095	320	253	97	[SNL1 - snl1p, SHE3 - she3p, CUE4 - cue4p, TIP20 - tip20p, GPT2 - bifunctional glycerol-3-phosphate/glycerone-phosphate o-acyltransferase gpt2, ERJ5 - erj5p, PHO88 - pho88p, PBN1 - pbn1p, ALG1 - chitobiosyldiphosphodolichol beta-1,4 mannosyltransferase, EMC1 - emc1p, PKR1 - pkr1p, ALG11 - alpha-1,2-mannosyltransferase alg11, SEC39 - sec39p, GPI13 - gpi13p, CBR1 - cbr1p, HMG2 - hydroxymethylglutar…
GO:0005789	endoplasmic reticulum membrane	8.49e-38	2.85e-35	4.9	4095	281	253	85	[YNL181W - hypothetical protein, SNL1 - snl1p, SHE3 - she3p, GET1 - get1p, WBP1 - wbp1p, SPC1 - spc1p, TIP20 - tip20p, SCT1 - bifunctional glycerol-3-phosphate/glycerone-phosphate o-acyltransferase sct1, ERJ5 - erj5p, PBN1 - pbn1p, PHO88 - pho88p, ORM2 - orm2p, ALG1 - chitobiosyldiphosphodolichol beta-1,4 mannosyltransferase, GPI8 - gpi8p, EMC1 - emc1p, PKR1 - pkr1p, ALG11 - alpha-1,2-mannosyltra…
GO:0044425	membrane part	4.82e-31	1.21e-28	1.78	4095	1097	616	294	[YLR194C - hypothetical protein, GNP1 - gnp1p, SEC27 - sec27p, YMR134W - hypothetical protein, SLC1 - 1-acylglycerol-3-phosphate o-acyltransferase slc1, TIP20 - tip20p, GPT2 - bifunctional glycerol-3-phosphate/glycerone-phosphate o-acyltransferase gpt2, PBN1 - pbn1p, VMA4 - vma4p, SNA2 - sna2p, EMC1 - emc1p, YIP3 - yip3p, PMR1 - ca(2+)/mn(2+)-transporting p-type atpase pmr1, PHO86 - pho86p, PKR1 …
GO:0031224	intrinsic component of membrane	6.65e-25	1.34e-22	1.78	4095	875	666	254	[YLR194C - hypothetical protein, GNP1 - gnp1p, YMR134W - hypothetical protein, SLC1 - 1-acylglycerol-3-phosphate o-acyltransferase slc1, GPT2 - bifunctional glycerol-3-phosphate/glycerone-phosphate o-acyltransferase gpt2, PBN1 - pbn1p, VMA4 - vma4p, SNA2 - sna2p, EMC1 - emc1p, YIP3 - yip3p, PMR1 - ca(2+)/mn(2+)-transporting p-type atpase pmr1, PHO86 - pho86p, PKR1 - pkr1p, COS8 - cos8p, ALG11 - a…
GO:0016020	membrane	3.18e-23	5.33e-21	1.67	4095	1338	486	265	[GNP1 - gnp1p, COG6 - cog6p, SEC27 - sec27p, YMR134W - hypothetical protein, SLC1 - 1-acylglycerol-3-phosphate o-acyltransferase slc1, TIP20 - tip20p, PRE10 - proteasome core particle subunit alpha 7, GPT2 - bifunctional glycerol-3-phosphate/glycerone-phosphate o-acyltransferase gpt2, PBN1 - pbn1p, VMA4 - vma4p, MDV1 - mdv1p, SNA2 - sna2p, EMC1 - emc1p, YIP3 - yip3p, PMR1 - ca(2+)/mn(2+)-transpor…
GO:0016021	integral component of membrane	4.27e-21	6.13e-19	1.92	4095	845	469	186	[LEM3 - lem3p, SNL1 - snl1p, KRE1 - kre1p, GNP1 - gnp1p, YMR134W - hypothetical protein, SLC1 - 1-acylglycerol-3-phosphate o-acyltransferase slc1, CUE4 - cue4p, GPT2 - bifunctional glycerol-3-phosphate/glycerone-phosphate o-acyltransferase gpt2, ERJ5 - erj5p, DRS2 - aminophospholipid-translocating p4-type atpase drs2, PHO88 - pho88p, PBN1 - pbn1p, VMA4 - vma4p, ALG1 - chitobiosyldiphosphodolichol…
GO:0044446	intracellular organelle part	3.38e-19	4.25e-17	1.27	4095	2347	755	550	[LAS1 - las1p, SEC27 - sec27p, YMR134W - hypothetical protein, SNF6 - snf6p, PSO2 - pso2p, TIP20 - tip20p, GPT2 - bifunctional glycerol-3-phosphate/glycerone-phosphate o-acyltransferase gpt2, SBP1 - sbp1p, RPS16A - ribosomal 40s subunit protein s16a, PBN1 - pbn1p, SPC24 - spc24p, ASI1 - putative ubiquitin-protein ligase asi1, EMC1 - emc1p, NUT1 - nut1p, PMR1 - ca(2+)/mn(2+)-transporting p-type at…
GO:0044422	organelle part	5.2e-19	5.81e-17	1.27	4095	2350	755	550	[LAS1 - las1p, SEC27 - sec27p, YMR134W - hypothetical protein, SNF6 - snf6p, PSO2 - pso2p, TIP20 - tip20p, GPT2 - bifunctional glycerol-3-phosphate/glycerone-phosphate o-acyltransferase gpt2, SBP1 - sbp1p, RPS16A - ribosomal 40s subunit protein s16a, PBN1 - pbn1p, SPC24 - spc24p, ASI1 - putative ubiquitin-protein ligase asi1, EMC1 - emc1p, NUT1 - nut1p, PMR1 - ca(2+)/mn(2+)-transporting p-type at…
GO:0000777	condensed chromosome kinetochore	1.55e-17	1.56e-15	28.14	4095	59	37	15	[DSN1 - dsn1p, SPC25 - spc25p, MIF2 - mif2p, KRE28 - kre28p, MTW1 - mtw1p, DAD3 - dad3p, BUB1 - bub1p, TID3 - tid3p, NUF2 - nuf2p, SPC24 - spc24p, NKP2 - nkp2p, OKP1 - okp1p, AME1 - ame1p, NSL1 - nsl1p, SPC105 - spc105p]
GO:0000776	kinetochore	2.08e-17	1.9e-15	14.77	4095	66	84	20	[DSN1 - dsn1p, SPC25 - spc25p, MCM21 - mcm21p, MIF2 - mif2p, KRE28 - kre28p, MTW1 - mtw1p, DAD3 - dad3p, BUB1 - bub1p, TID3 - tid3p, NUF2 - nuf2p, SPC24 - spc24p, RTS1 - rts1p, NKP2 - nkp2p, OKP1 - okp1p, CSE4 - cse4p, AME1 - ame1p, NSL1 - nsl1p, SPC105 - spc105p, DUO1 - duo1p, ASK1 - ask1p]
GO:0000775	chromosome, centromeric region	2.97e-17	2.49e-15	14.55	4095	67	84	20	[DSN1 - dsn1p, SPC25 - spc25p, MCM21 - mcm21p, MIF2 - mif2p, KRE28 - kre28p, MTW1 - mtw1p, DAD3 - dad3p, BUB1 - bub1p, TID3 - tid3p, NUF2 - nuf2p, SPC24 - spc24p, RTS1 - rts1p, NKP2 - nkp2p, OKP1 - okp1p, CSE4 - cse4p, NSL1 - nsl1p, AME1 - ame1p, SPC105 - spc105p, DUO1 - duo1p, ASK1 - ask1p]
GO:0098588	bounding membrane of organelle	7.39e-14	5.72e-12	1.84	4095	451	737	149	[SEC26 - sec26p, PHS1 - phs1p, SEC27 - sec27p, COG6 - cog6p, CTR2 - ctr2p, VOA1 - voa1p, YCK3 - yck3p, DRS2 - aminophospholipid-translocating p4-type atpase drs2, MDV1 - mdv1p, VMA4 - vma4p, ALO1 - d-arabinono-1,4-lactone oxidase, SEC13 - sec13p, SNA2 - sna2p, YIP3 - yip3p, PMR1 - ca(2+)/mn(2+)-transporting p-type atpase pmr1, GRH1 - grh1p, SEC16 - sec16p, SEC21 - sec21p, BRO1 - bro1p, AKR1 - akr…
GO:0044444	cytoplasmic part	1.9e-13	1.36e-11	1.22	4095	2538	683	517	[LAS1 - las1p, SEC27 - sec27p, YMR134W - hypothetical protein, SNF6 - snf6p, SLC1 - 1-acylglycerol-3-phosphate o-acyltransferase slc1, SIS2 - phosphopantothenoylcysteine decarboxylase complex subunit sis2, TIP20 - tip20p, GPT2 - bifunctional glycerol-3-phosphate/glycerone-phosphate o-acyltransferase gpt2, SBP1 - sbp1p, RPS16A - ribosomal 40s subunit protein s16a, GPD1 - glycerol-3-phosphate dehyd…
GO:0031227	intrinsic component of endoplasmic reticulum membrane	4.42e-13	2.96e-11	4.72	4095	54	466	29	[ERV41 - erv41p, CAX4 - cax4p, GPI19 - gpi19p, CUE4 - cue4p, BIG1 - big1p, SAC1 - phosphatidylinositol-3-phosphatase sac1, SPC1 - spc1p, GPT2 - bifunctional glycerol-3-phosphate/glycerone-phosphate o-acyltransferase gpt2, SCT1 - bifunctional glycerol-3-phosphate/glycerone-phosphate o-acyltransferase sct1, ERG4 - delta(24(24(1)))-sterol reductase, ELO1 - elo1p, SRP102 - srp102p, PKR1 - pkr1p, USE1…
GO:0030176	integral component of endoplasmic reticulum membrane	2.21e-12	1.39e-10	4.64	4095	53	466	28	[ERV41 - erv41p, CAX4 - cax4p, GPI19 - gpi19p, CUE4 - cue4p, BIG1 - big1p, SAC1 - phosphatidylinositol-3-phosphatase sac1, SPC1 - spc1p, GPT2 - bifunctional glycerol-3-phosphate/glycerone-phosphate o-acyltransferase gpt2, SCT1 - bifunctional glycerol-3-phosphate/glycerone-phosphate o-acyltransferase sct1, ERG4 - delta(24(24(1)))-sterol reductase, ELO1 - elo1p, SRP102 - srp102p, PKR1 - pkr1p, USE1…
GO:0005794	Golgi apparatus	2.21e-12	1.31e-10	2.09	4095	201	840	86	[SEC26 - sec26p, MNN9 - mnn9p, MRL1 - mrl1p, ARL3 - arl3p, TRS20 - trs20p, PEP1 - pep1p, SEC27 - sec27p, COG6 - cog6p, RBD2 - rbd2p, CHS5 - chs5p, GET1 - get1p, GGA1 - gga1p, TVP23 - tvp23p, DRS2 - aminophospholipid-translocating p4-type atpase drs2, AGE1 - age1p, YIP3 - yip3p, PMR1 - ca(2+)/mn(2+)-transporting p-type atpase pmr1, GRH1 - grh1p, SVP26 - svp26p, MTC1 - mtc1p, APL6 - apl6p, SEC21 - …
GO:0098687	chromosomal region	1.6e-11	8.93e-10	11.22	4095	148	37	15	[DSN1 - dsn1p, SPC25 - spc25p, MIF2 - mif2p, KRE28 - kre28p, MTW1 - mtw1p, DAD3 - dad3p, BUB1 - bub1p, TID3 - tid3p, NUF2 - nuf2p, SPC24 - spc24p, NKP2 - nkp2p, OKP1 - okp1p, AME1 - ame1p, NSL1 - nsl1p, SPC105 - spc105p]
GO:0005694	chromosome	2.88e-11	1.53e-09	12.4	4095	125	37	14	[DSN1 - dsn1p, SPC25 - spc25p, MIF2 - mif2p, KRE28 - kre28p, MTW1 - mtw1p, DAD3 - dad3p, TID3 - tid3p, NUF2 - nuf2p, SPC24 - spc24p, NKP2 - nkp2p, OKP1 - okp1p, NSL1 - nsl1p, AME1 - ame1p, SPC105 - spc105p]
GO:0000778	condensed nuclear chromosome kinetochore	3.24e-11	1.63e-09	33.02	4095	36	31	9	[NUF2 - nuf2p, SPC25 - spc25p, MIF2 - mif2p, SPC24 - spc24p, KRE28 - kre28p, OKP1 - okp1p, SPC105 - spc105p, BUB1 - bub1p, TID3 - tid3p]
GO:0098805	whole membrane	3.92e-11	1.88e-09	1.78	4095	381	737	122	[SEC26 - sec26p, PHS1 - phs1p, SEC27 - sec27p, CTR2 - ctr2p, VOA1 - voa1p, YCK3 - yck3p, MDV1 - mdv1p, VMA4 - vma4p, SEC13 - sec13p, ALO1 - d-arabinono-1,4-lactone oxidase, SNA2 - sna2p, SEC16 - sec16p, SEC21 - sec21p, BRO1 - bro1p, AKR1 - akr1p, FAA1 - long-chain fatty acid-coa ligase faa1, NEO1 - putative aminophospholipid-translocating p4-type atpase neo1, CBR1 - cbr1p, MYO2 - myosin 2, HMG2 -…
GO:0000780	condensed nuclear chromosome, centromeric region	7.28e-11	3.33e-09	34.05	4095	13	74	8	[NUF2 - nuf2p, SPC25 - spc25p, SPC24 - spc24p, MIF2 - mif2p, RTS1 - rts1p, CSE4 - cse4p, TID3 - tid3p, BUB1 - bub1p]
GO:0000779	condensed chromosome, centromeric region	1.79e-10	7.84e-09	31.62	4095	14	74	8	[NUF2 - nuf2p, SPC25 - spc25p, SPC24 - spc24p, MIF2 - mif2p, RTS1 - rts1p, CSE4 - cse4p, TID3 - tid3p, BUB1 - bub1p]
GO:0043234	protein complex	2.75e-10	1.15e-08	1.4	4095	962	790	260	[COG6 - cog6p, SEC27 - sec27p, HAP5 - hap5p, SIS2 - phosphopantothenoylcysteine decarboxylase complex subunit sis2, PRT1 - prt1p, TIP20 - tip20p, PRE10 - proteasome core particle subunit alpha 7, SWI4 - swi4p, PBN1 - pbn1p, VMA4 - vma4p, SEC13 - sec13p, SPC24 - spc24p, NUT1 - nut1p, EMC1 - emc1p, GRH1 - grh1p, MED2 - med2p, UBP3 - ubp3p, TRS31 - trs31p, RRP7 - rrp7p, COG3 - cog3p, SKI3 - ski3p, M…
GO:0032991	macromolecular complex	3.26e-10	1.31e-08	1.21	4095	1793	995	528	[LAS1 - las1p, SEC27 - sec27p, SNF6 - snf6p, SIS2 - phosphopantothenoylcysteine decarboxylase complex subunit sis2, TIP20 - tip20p, SBP1 - sbp1p, RPS16A - ribosomal 40s subunit protein s16a, GPD1 - glycerol-3-phosphate dehydrogenase (nad(+)) gpd1, PBN1 - pbn1p, SPC24 - spc24p, ASI1 - putative ubiquitin-protein ligase asi1, EMC1 - emc1p, NUT1 - nut1p, MED2 - med2p, RRP7 - rrp7p, APC11 - anaphase p…
GO:0044431	Golgi apparatus part	4.68e-10	1.81e-08	2.32	4095	166	649	61	[SEC26 - sec26p, TRS20 - trs20p, COG6 - cog6p, SEC27 - sec27p, RBD2 - rbd2p, GET1 - get1p, TVP23 - tvp23p, DRS2 - aminophospholipid-translocating p4-type atpase drs2, YIP3 - yip3p, PMR1 - ca(2+)/mn(2+)-transporting p-type atpase pmr1, SEC31 - sec31p, SVP26 - svp26p, GRH1 - grh1p, SEC16 - sec16p, SEC21 - sec21p, TRS31 - trs31p, AKR1 - akr1p, NEO1 - putative aminophospholipid-translocating p4-type …
GO:0000139	Golgi membrane	7.78e-09	2.9e-07	2.53	4095	114	638	45	[SEC26 - sec26p, COY1 - coy1p, SEC27 - sec27p, COG6 - cog6p, ERV41 - erv41p, AUR1 - inositol phosphorylceramide synthase, RBD2 - rbd2p, GET1 - get1p, STV1 - stv1p, TVP23 - tvp23p, DRS2 - aminophospholipid-translocating p4-type atpase drs2, SEC28 - sec28p, COP1 - cop1p, EPT1 - bifunctional diacylglycerol cholinephosphotransferase/ethanolaminephosphotransferase, YOP1 - yop1p, YIP3 - yip3p, VPS45 - …
GO:0030120	vesicle coat	1.64e-08	5.91e-07	3.9	4095	17	987	16	[SEC26 - sec26p, SEC21 - sec21p, CLC1 - clc1p, SEC27 - sec27p, SFB3 - sfb3p, GLO3 - glo3p, CHC1 - chc1p, SEC24 - sec24p, SEC28 - sec28p, COP1 - cop1p, RET3 - ret3p, SEC13 - sec13p, ENT5 - ent5p, RET2 - ret2p, SEC31 - sec31p, GRH1 - grh1p]
GO:0030117	membrane coat	1.84e-08	6.38e-07	3.46	4095	24	987	20	[SEC26 - sec26p, SEC21 - sec21p, CLC1 - clc1p, SEC27 - sec27p, APL1 - apl1p, SFB3 - sfb3p, GLO3 - glo3p, CHC1 - chc1p, SEC24 - sec24p, SEC28 - sec28p, COP1 - cop1p, RET3 - ret3p, SEC13 - sec13p, ENT5 - ent5p, RET2 - ret2p, APL5 - apl5p, SEC31 - sec31p, GRH1 - grh1p, APL4 - apl4p, APL6 - apl6p]
GO:0043226	organelle	2.42e-08	8.11e-07	1.12	4095	3501	279	268	[NSA2 - nsa2p, LAS1 - las1p, SEC27 - sec27p, YMR134W - hypothetical protein, SIS2 - phosphopantothenoylcysteine decarboxylase complex subunit sis2, RPL23B - ribosomal 60s subunit protein l23b, TIP20 - tip20p, GPT2 - bifunctional glycerol-3-phosphate/glycerone-phosphate o-acyltransferase gpt2, SBP1 - sbp1p, RPS16A - ribosomal 40s subunit protein s16a, PBN1 - pbn1p, SPC24 - spc24p, EMC1 - emc1p, PH…
GO:0031262	Ndc80 complex	3.28e-08	1.07e-06	105.68	4095	5	31	4	[NUF2 - nuf2p, SPC25 - spc25p, SPC24 - spc24p, TID3 - tid3p]
GO:0043229	intracellular organelle	6.17e-08	1.94e-06	1.12	4095	3500	279	268	[NSA2 - nsa2p, LAS1 - las1p, SEC27 - sec27p, YMR134W - hypothetical protein, SIS2 - phosphopantothenoylcysteine decarboxylase complex subunit sis2, RPL23B - ribosomal 60s subunit protein l23b, TIP20 - tip20p, GPT2 - bifunctional glycerol-3-phosphate/glycerone-phosphate o-acyltransferase gpt2, SBP1 - sbp1p, RPS16A - ribosomal 40s subunit protein s16a, PBN1 - pbn1p, SPC24 - spc24p, EMC1 - emc1p, PH…
GO:0000444	MIS12/MIND type complex	6.92e-08	2.11e-06	88.54	4095	5	37	4	[DSN1 - dsn1p, MIF2 - mif2p, MTW1 - mtw1p, NSL1 - nsl1p]
GO:0000818	nuclear MIS12/MIND complex	6.92e-08	2.05e-06	88.54	4095	5	37	4	[DSN1 - dsn1p, MIF2 - mif2p, MTW1 - mtw1p, NSL1 - nsl1p]
GO:0044445	cytosolic part	1.29e-07	3.71e-06	1.75	4095	191	992	81	[RPS0B - ribosomal 40s subunit protein s0b, SNL1 - snl1p, RPL24A - ribosomal 60s subunit protein l24a, NMD3 - nmd3p, RPS26B - ribosomal 40s subunit protein s26b, RPL36B - ribosomal 60s subunit protein l36b, RPL23B - ribosomal 60s subunit protein l23b, PRE10 - proteasome core particle subunit alpha 7, RPS16A - ribosomal 40s subunit protein s16a, RPL37B - ribosomal 60s subunit protein l37b, REI1 - …
GO:0043227	membrane-bounded organelle	1.82e-07	5.1e-06	1.24	4095	3256	92	91	[NSA2 - nsa2p, LAS1 - las1p, SEC27 - sec27p, YMR134W - hypothetical protein, MTW1 - mtw1p, CUE4 - cue4p, WBP1 - wbp1p, SPC1 - spc1p, DNA2 - dna2p, TID3 - tid3p, NUF2 - nuf2p, PBN1 - pbn1p, ERG4 - delta(24(24(1)))-sterol reductase, MRPS18 - mitochondrial 37s ribosomal protein yms18, SPC24 - spc24p, GPI8 - gpi8p, EMC1 - emc1p, PKR1 - pkr1p, YRB30 - yrb30p, ERG26 - sterol-4-alpha-carboxylate 3-dehyd…
GO:0043231	intracellular membrane-bounded organelle	2.43e-07	6.61e-06	1.23	4095	3199	124	119	[NSA2 - nsa2p, ARL3 - arl3p, LAS1 - las1p, KRE1 - kre1p, SEC27 - sec27p, YMR134W - hypothetical protein, MTW1 - mtw1p, CUE4 - cue4p, DNA2 - dna2p, PBN1 - pbn1p, MRPS18 - mitochondrial 37s ribosomal protein yms18, ALG1 - chitobiosyldiphosphodolichol beta-1,4 mannosyltransferase, SPC24 - spc24p, EMC1 - emc1p, PKR1 - pkr1p, YRB30 - yrb30p, DSN1 - dsn1p, ELP3 - elongator subunit elp3, AKR1 - akr1p, G…
GO:0044454	nuclear chromosome part	4.57e-07	1.21e-05	5.7	4095	272	37	14	[DSN1 - dsn1p, SPC25 - spc25p, MIF2 - mif2p, KRE28 - kre28p, MTW1 - mtw1p, DAD3 - dad3p, BUB1 - bub1p, TID3 - tid3p, NUF2 - nuf2p, SPC24 - spc24p, OKP1 - okp1p, AME1 - ame1p, NSL1 - nsl1p, SPC105 - spc105p]
GO:0030126	COPI vesicle coat	8.33e-07	2.15e-05	10.79	4095	8	332	7	[COP1 - cop1p, SEC26 - sec26p, SEC21 - sec21p, SEC27 - sec27p, RET3 - ret3p, RET2 - ret2p, SEC28 - sec28p]
GO:0030663	COPI-coated vesicle membrane	8.33e-07	2.1e-05	10.79	4095	8	332	7	[COP1 - cop1p, SEC26 - sec26p, SEC21 - sec21p, SEC27 - sec27p, RET3 - ret3p, RET2 - ret2p, SEC28 - sec28p]
GO:0031597	cytosolic proteasome complex	1.08e-06	2.66e-05	3.46	4095	27	790	18	[PUP1 - proteasome core particle subunit beta 2, RPN11 - proteasome regulatory particle lid subunit rpn11, RPT5 - proteasome regulatory particle base subunit rpt5, RPT3 - proteasome regulatory particle base subunit rpt3, RPN8 - proteasome regulatory particle lid subunit rpn8, RPN9 - proteasome regulatory particle lid subunit rpn9, PRE10 - proteasome core particle subunit alpha 7, PRE8 - proteasom…
GO:0070847	core mediator complex	1.34e-06	3.22e-05	3.94	4095	21	742	15	[MED2 - med2p, SRB6 - srb6p, SRB4 - srb4p, PGD1 - pgd1p, ROX3 - rox3p, RGR1 - rgr1p, MED7 - med7p, MED6 - med6p, SRB2 - srb2p, MED4 - med4p, CSE2 - cse2p, GAL11 - gal11p, MED1 - med1p, SIN4 - sin4p, BUD27 - bud27p]
GO:0012506	vesicle membrane	1.68e-06	3.93e-05	3.82	4095	31	588	17	[SEC26 - sec26p, SEC16 - sec16p, SEC21 - sec21p, CLC1 - clc1p, SEC27 - sec27p, CHC1 - chc1p, SEC24 - sec24p, SEC28 - sec28p, COP1 - cop1p, RET3 - ret3p, SNA3 - sna3p, USO1 - uso1p, RET2 - ret2p, SEC31 - sec31p, VID24 - glucose-induced degradation complex subunit vid24, APL6 - apl6p, APL4 - apl4p]
GO:0030659	cytoplasmic vesicle membrane	1.68e-06	3.84e-05	3.82	4095	31	588	17	[SEC26 - sec26p, SEC16 - sec16p, SEC21 - sec21p, CLC1 - clc1p, SEC27 - sec27p, CHC1 - chc1p, SEC24 - sec24p, SEC28 - sec28p, COP1 - cop1p, SNA3 - sna3p, RET3 - ret3p, USO1 - uso1p, RET2 - ret2p, SEC31 - sec31p, VID24 - glucose-induced degradation complex subunit vid24, APL6 - apl6p, APL4 - apl4p]
GO:0030134	COPII-coated ER to Golgi transport vesicle	1.84e-06	4.11e-05	4.29	4095	21	637	14	[ERP5 - erp5p, ERV41 - erv41p, GOT1 - got1p, ERP3 - erp3p, EMP47 - emp47p, ERV25 - erv25p, EMP24 - emp24p, ERV14 - erv14p, ERP4 - erp4p, YIP3 - yip3p, GAS1 - gas1p, ERP2 - erp2p, SVP26 - svp26p, ERP1 - erp1p]
GO:0031090	organelle membrane	1.9e-06	4.16e-05	1.38	4095	721	779	189	[SEC26 - sec26p, SNL1 - snl1p, PHS1 - phs1p, GNP1 - gnp1p, COG6 - cog6p, SEC27 - sec27p, CTR2 - ctr2p, COX20 - cox20p, VOA1 - voa1p, YCK3 - yck3p, DRS2 - aminophospholipid-translocating p4-type atpase drs2, MDV1 - mdv1p, VMA4 - vma4p, DBP5 - atp-dependent rna helicase dbp5, SEC13 - sec13p, ALO1 - d-arabinono-1,4-lactone oxidase, SNA2 - sna2p, ASI1 - putative ubiquitin-protein ligase asi1, YIP3 - …
GO:0098796	membrane protein complex	2.14e-06	4.58e-05	2.14	4095	197	446	46	[SEC26 - sec26p, CLC1 - clc1p, VPS68 - vps68p, SEC27 - sec27p, GGA2 - gga2p, DID4 - did4p, SRP21 - srp21p, VMA16 - vma16p, STE4 - ste4p, COX7 - cytochrome c oxidase subunit vii, PFK2 - 6-phosphofructokinase subunit beta, STV1 - stv1p, SPC1 - spc1p, CHC1 - chc1p, TOM70 - tom70p, SEC28 - sec28p, COP1 - cop1p, VMA8 - vma8p, VMA4 - vma4p, EMC2 - emc2p, YME1 - yme1p, SPC2 - spc2p, EMC1 - emc1p, SNF7 -…
GO:0002178	palmitoyltransferase complex	2.28e-06	4.77e-05	16.31	4095	5	251	5	[LCB2 - serine c-palmitoyltransferase lcb2, ORM1 - orm1p, LCB1 - serine c-palmitoyltransferase lcb1, ORM2 - orm2p, SAC1 - phosphatidylinositol-3-phosphatase sac1]
GO:0031211	endoplasmic reticulum palmitoyltransferase complex	2.28e-06	4.67e-05	16.31	4095	5	251	5	[LCB2 - serine c-palmitoyltransferase lcb2, ORM1 - orm1p, ORM2 - orm2p, LCB1 - serine c-palmitoyltransferase lcb1, SAC1 - phosphatidylinositol-3-phosphatase sac1]
GO:0035339	SPOTS complex	2.28e-06	4.58e-05	16.31	4095	5	251	5	[LCB2 - serine c-palmitoyltransferase lcb2, ORM1 - orm1p, ORM2 - orm2p, LCB1 - serine c-palmitoyltransferase lcb1, SAC1 - phosphatidylinositol-3-phosphatase sac1]
GO:0017059	serine C-palmitoyltransferase complex	2.28e-06	4.49e-05	16.31	4095	5	251	5	[LCB2 - serine c-palmitoyltransferase lcb2, ORM1 - orm1p, LCB1 - serine c-palmitoyltransferase lcb1, ORM2 - orm2p, SAC1 - phosphatidylinositol-3-phosphatase sac1]
GO:0042765	GPI-anchor transamidase complex	2.48e-06	4.8e-05	87.13	4095	3	47	3	[GPI8 - gpi8p, GPI17 - gpi17p, GAA1 - gaa1p]
GO:0031225	anchored component of membrane	2.73e-06	5.18e-05	3.37	4095	35	660	19	[YLR194C - hypothetical protein, YPS1 - yps1p, KRE1 - kre1p, SED1 - sed1p, DFG5 - dfg5p, BAR1 - bar1p, YJL171C - hypothetical protein, EGT2 - egt2p, CCW12 - ccw12p, CCW14 - ccw14p, PST1 - pst1p, CWP1 - cwp1p, CWP2 - cwp2p, GAS3 - gas3p, DCW1 - dcw1p, PRY3 - pry3p, TIP1 - tip1p, GAS1 - gas1p, YPS3 - yps3p]
GO:0044433	cytoplasmic vesicle part	3.07e-06	5.71e-05	1.84	4095	133	987	59	[SEC26 - sec26p, MRL1 - mrl1p, TRS20 - trs20p, SEC27 - sec27p, PEP1 - pep1p, APL1 - apl1p, CHS5 - chs5p, GLO3 - glo3p, SLA1 - sla1p, SEC13 - sec13p, SNF7 - snf7p, SEC31 - sec31p, GRH1 - grh1p, VID24 - glucose-induced degradation complex subunit vid24, APL6 - apl6p, SEC16 - sec16p, SEC21 - sec21p, VPS5 - vps5p, AKR1 - akr1p, TRS31 - trs31p, BRO1 - bro1p, PEP5 - pep5p, EMP70 - emp70p, NEO1 - putati…
GO:0044427	chromosomal part	3.1e-06	5.68e-05	5.52	4095	387	23	12	[NUF2 - nuf2p, DSN1 - dsn1p, SPC25 - spc25p, MIF2 - mif2p, KRE28 - kre28p, NKP2 - nkp2p, OKP1 - okp1p, AME1 - ame1p, NSL1 - nsl1p, SPC105 - spc105p, TID3 - tid3p, BUB1 - bub1p]
GO:0000817	COMA complex	3.86e-06	6.94e-05	27.67	4095	4	148	4	[MCM21 - mcm21p, OKP1 - okp1p, AME1 - ame1p, CTF19 - ctf19p]
GO:0030662	coated vesicle membrane	5.28e-06	9.32e-05	3.23	4095	21	967	16	[SEC16 - sec16p, SEC26 - sec26p, SEC21 - sec21p, SEC27 - sec27p, SEC24 - sec24p, SEC28 - sec28p, CCC2 - cu(2+)-transporting p-type atpase ccc2, COP1 - cop1p, SEC13 - sec13p, RET3 - ret3p, USO1 - uso1p, RET2 - ret2p, APL5 - apl5p, SEC31 - sec31p, APL4 - apl4p, APL6 - apl6p]
GO:0031982	vesicle	5.52e-06	9.58e-05	1.83	4095	210	649	61	[SEC26 - sec26p, SEC27 - sec27p, RBD2 - rbd2p, SLA1 - sla1p, YIP3 - yip3p, SNF7 - snf7p, SEC31 - sec31p, COS8 - cos8p, EXO84 - exo84p, SVP26 - svp26p, MTC1 - mtc1p, APL6 - apl6p, VID24 - glucose-induced degradation complex subunit vid24, SEC21 - sec21p, EMP70 - emp70p, AKR1 - akr1p, BRO1 - bro1p, NEO1 - putative aminophospholipid-translocating p4-type atpase neo1, MYO2 - myosin 2, ERP3 - erp3p, V…
GO:0005786	signal recognition particle, endoplasmic reticulum targeting	6.02e-06	0.000103	102.38	4095	5	24	3	[SRP14 - srp14p, SRP21 - srp21p, SRP72 - srp72p]
GO:0048500	signal recognition particle	6.02e-06	0.000101	102.38	4095	5	24	3	[SRP14 - srp14p, SRP21 - srp21p, SRP72 - srp72p]
GO:0000329	fungal-type vacuole membrane	7.46e-06	0.000123	1.89	4095	166	730	56	[YPQ2 - ypq2p, PHS1 - phs1p, CTR2 - ctr2p, MNR2 - putative mg(2+) transporter mnr2, VOA1 - voa1p, YCK3 - yck3p, VMA4 - vma4p, SNA2 - sna2p, YBR241C - hypothetical protein, TMS1 - tms1p, EMP70 - emp70p, VMA13 - vma13p, MYO2 - myosin 2, VPS60 - vps60p, EMP47 - emp47p, SLM4 - slm4p, VMA10 - vma10p, FET5 - fet5p, SNA3 - sna3p, FTH1 - fth1p, VTC4 - vtc4p, RCR2 - rcr2p, YCF1 - atp-binding cassette glut…
GO:0098852	lytic vacuole membrane	7.46e-06	0.000121	1.89	4095	166	730	56	[YPQ2 - ypq2p, PHS1 - phs1p, CTR2 - ctr2p, MNR2 - putative mg(2+) transporter mnr2, VOA1 - voa1p, YCK3 - yck3p, VMA4 - vma4p, SNA2 - sna2p, YBR241C - hypothetical protein, TMS1 - tms1p, EMP70 - emp70p, VMA13 - vma13p, MYO2 - myosin 2, VPS60 - vps60p, EMP47 - emp47p, SLM4 - slm4p, VMA10 - vma10p, FET5 - fet5p, SNA3 - sna3p, FTH1 - fth1p, VTC4 - vtc4p, RCR2 - rcr2p, YCF1 - atp-binding cassette glut…
GO:0030660	Golgi-associated vesicle membrane	7.81e-06	0.000125	6.94	4095	16	332	9	[COP1 - cop1p, SEC16 - sec16p, SEC26 - sec26p, SEC21 - sec21p, SEC27 - sec27p, RET3 - ret3p, RET2 - ret2p, SEC24 - sec24p, SEC28 - sec28p]
GO:0097708	intracellular vesicle	8.22e-06	0.000129	1.82	4095	208	649	60	[SEC26 - sec26p, SEC27 - sec27p, RBD2 - rbd2p, SLA1 - sla1p, YIP3 - yip3p, SNF7 - snf7p, SEC31 - sec31p, COS8 - cos8p, EXO84 - exo84p, SVP26 - svp26p, MTC1 - mtc1p, APL6 - apl6p, VID24 - glucose-induced degradation complex subunit vid24, SEC21 - sec21p, EMP70 - emp70p, AKR1 - akr1p, BRO1 - bro1p, NEO1 - putative aminophospholipid-translocating p4-type atpase neo1, MYO2 - myosin 2, ERP3 - erp3p, V…
GO:0031410	cytoplasmic vesicle	8.22e-06	0.000127	1.82	4095	208	649	60	[SEC26 - sec26p, SEC27 - sec27p, RBD2 - rbd2p, SLA1 - sla1p, YIP3 - yip3p, SNF7 - snf7p, SEC31 - sec31p, COS8 - cos8p, EXO84 - exo84p, SVP26 - svp26p, MTC1 - mtc1p, APL6 - apl6p, VID24 - glucose-induced degradation complex subunit vid24, SEC21 - sec21p, EMP70 - emp70p, AKR1 - akr1p, BRO1 - bro1p, NEO1 - putative aminophospholipid-translocating p4-type atpase neo1, MYO2 - myosin 2, ERP3 - erp3p, V…
GO:0030173	integral component of Golgi membrane	9.12e-06	0.000139	5.02	4095	13	627	10	[EMP47 - emp47p, COY1 - coy1p, ERV41 - erv41p, TVP38 - tvp38p, SAC1 - phosphatidylinositol-3-phosphatase sac1, TVP23 - tvp23p, SVP26 - svp26p, SYS1 - sys1p, KEI1 - kei1p, GVP36 - gvp36p]
GO:0031228	intrinsic component of Golgi membrane	9.12e-06	0.000137	5.02	4095	13	627	10	[EMP47 - emp47p, COY1 - coy1p, ERV41 - erv41p, TVP38 - tvp38p, SAC1 - phosphatidylinositol-3-phosphatase sac1, TVP23 - tvp23p, SVP26 - svp26p, SYS1 - sys1p, KEI1 - kei1p, GVP36 - gvp36p]
GO:0005798	Golgi-associated vesicle	9.51e-06	0.000141	3.08	4095	41	649	20	[SEC7 - sec7p, ERP5 - erp5p, ERV41 - erv41p, RBD2 - rbd2p, NEO1 - putative aminophospholipid-translocating p4-type atpase neo1, GOT1 - got1p, ERP3 - erp3p, YOL107W - hypothetical protein, EMP47 - emp47p, ERV25 - erv25p, EMP24 - emp24p, ERV14 - erv14p, RET2 - ret2p, ERP4 - erp4p, YIP3 - yip3p, GAS1 - gas1p, ERP2 - erp2p, SVP26 - svp26p, ERP1 - erp1p, MTC1 - mtc1p]
GO:0000939	condensed chromosome inner kinetochore	1.07e-05	0.000157	409.5	4095	2	10	2	[DSN1 - dsn1p, SPC105 - spc105p]
GO:0000941	condensed nuclear chromosome inner kinetochore	1.07e-05	0.000154	409.5	4095	2	10	2	[DSN1 - dsn1p, SPC105 - spc105p]
GO:0016592	mediator complex	1.11e-05	0.000157	3.4	4095	26	742	16	[MED2 - med2p, SRB6 - srb6p, SRB4 - srb4p, PGD1 - pgd1p, ROX3 - rox3p, RGR1 - rgr1p, TAF14 - taf14p, MED7 - med7p, MED6 - med6p, SRB2 - srb2p, MED4 - med4p, CSE2 - cse2p, NUT1 - nut1p, GAL11 - gal11p, MED1 - med1p, SIN4 - sin4p]
GO:0034515	proteasome storage granule	1.62e-05	0.000227	3.12	4095	23	912	16	[PUP1 - proteasome core particle subunit beta 2, RPN11 - proteasome regulatory particle lid subunit rpn11, RPN8 - proteasome regulatory particle lid subunit rpn8, PRE10 - proteasome core particle subunit alpha 7, RPN9 - proteasome regulatory particle lid subunit rpn9, RPT6 - proteasome regulatory particle base subunit rpt6, PRE5 - proteasome core particle subunit alpha 6, PRE8 - proteasome core p…
GO:0031968	organelle outer membrane	1.8e-05	0.000248	2.76	4095	81	458	25	[NCA2 - nca2p, VPS1 - vps1p, PFK2 - 6-phosphofructokinase subunit beta, SAC1 - phosphatidylinositol-3-phosphatase sac1, TOM70 - tom70p, FMP52 - fmp52p, MDV1 - mdv1p, ALO1 - d-arabinono-1,4-lactone oxidase, TAZ1 - taz1p, GSF2 - gsf2p, EHT1 - eht1p, PFK1 - 6-phosphofructokinase subunit alpha, GPX1 - glutathione peroxidase gpx1, YKL027W - hypothetical protein, FAA1 - long-chain fatty acid-coa ligase…
GO:0019867	outer membrane	1.8e-05	0.000245	2.76	4095	81	458	25	[NCA2 - nca2p, VPS1 - vps1p, PFK2 - 6-phosphofructokinase subunit beta, SAC1 - phosphatidylinositol-3-phosphatase sac1, TOM70 - tom70p, FMP52 - fmp52p, MDV1 - mdv1p, ALO1 - d-arabinono-1,4-lactone oxidase, TAZ1 - taz1p, GSF2 - gsf2p, EHT1 - eht1p, PFK1 - 6-phosphofructokinase subunit alpha, GPX1 - glutathione peroxidase gpx1, FAA1 - long-chain fatty acid-coa ligase faa1, YKL027W - hypothetical pr…
GO:0005741	mitochondrial outer membrane	3.08e-05	0.000414	2.75	4095	78	458	24	[PFK1 - 6-phosphofructokinase subunit alpha, GPX1 - glutathione peroxidase gpx1, YKL027W - hypothetical protein, FAA1 - long-chain fatty acid-coa ligase faa1, CAF4 - caf4p, VPS1 - vps1p, NCA2 - nca2p, YHR003C - hypothetical protein, CBR1 - cbr1p, SAC1 - phosphatidylinositol-3-phosphatase sac1, PFK2 - 6-phosphofructokinase subunit beta, TOM70 - tom70p, FMP52 - fmp52p, MDV1 - mdv1p, CPT1 - diacylgl…
GO:0000502	proteasome complex	3.12e-05	0.000413	2.65	4095	43	790	22	[PUP1 - proteasome core particle subunit beta 2, RPN10 - proteasome regulatory particle base subunit rpn10, RPN11 - proteasome regulatory particle lid subunit rpn11, RPT5 - proteasome regulatory particle base subunit rpt5, RPT3 - proteasome regulatory particle base subunit rpt3, RPN8 - proteasome regulatory particle lid subunit rpn8, HMG2 - hydroxymethylglutaryl-coa reductase (nadph) hmg2, PRE10 …
GO:1905369	endopeptidase complex	3.12e-05	0.000407	2.65	4095	43	790	22	[PUP1 - proteasome core particle subunit beta 2, RPN10 - proteasome regulatory particle base subunit rpn10, RPN11 - proteasome regulatory particle lid subunit rpn11, RPT5 - proteasome regulatory particle base subunit rpt5, RPT3 - proteasome regulatory particle base subunit rpt3, RPN8 - proteasome regulatory particle lid subunit rpn8, HMG2 - hydroxymethylglutaryl-coa reductase (nadph) hmg2, RPN9 -…
GO:0044430	cytoskeletal part	4.25e-05	0.000548	4.75	4095	199	52	12	[NUF2 - nuf2p, DSN1 - dsn1p, KIP3 - tubulin-dependent atpase kip3, KRE28 - kre28p, NKP2 - nkp2p, MTW1 - mtw1p, AME1 - ame1p, NSL1 - nsl1p, SPC105 - spc105p, DAD3 - dad3p, BBC1 - bbc1p, ASK1 - ask1p]
GO:0031984	organelle subcompartment	7.98e-05	0.00102	2.57	4095	69	555	24	[TCB3 - tcb3p, RTN2 - rtn2p, CLC1 - clc1p, NEO1 - putative aminophospholipid-translocating p4-type atpase neo1, GGA2 - gga2p, GOT1 - got1p, KEX1 - kex1p, SAC1 - phosphatidylinositol-3-phosphatase sac1, DPL1 - sphinganine-1-phosphate aldolase dpl1, LNP1 - lnp1p, RVS167 - rvs167p, DRS2 - aminophospholipid-translocating p4-type atpase drs2, FAR11 - far11p, SFT2 - sft2p, NHX1 - nhx1p, TCB1 - tcb1p, U…
GO:0044437	vacuolar part	8.6e-05	0.00108	1.59	4095	215	860	72	[YPQ2 - ypq2p, PHS1 - phs1p, OPY2 - opy2p, NPC2 - npc2p, CTR2 - ctr2p, MNR2 - putative mg(2+) transporter mnr2, VOA1 - voa1p, YCK3 - yck3p, VMA4 - vma4p, SEC13 - sec13p, SNA2 - sna2p, YBR241C - hypothetical protein, TMS1 - tms1p, PFK1 - 6-phosphofructokinase subunit alpha, EMP70 - emp70p, PEP5 - pep5p, VMA13 - vma13p, MYO2 - myosin 2, VPS60 - vps60p, AIM20 - aim20p, EMP47 - emp47p, VMA10 - vma10p…
GO:0030135	coated vesicle	0.000124	0.00154	2.57	4095	55	637	22	[SEC26 - sec26p, ERP5 - erp5p, ERV41 - erv41p, RBD2 - rbd2p, NEO1 - putative aminophospholipid-translocating p4-type atpase neo1, GOT1 - got1p, ERP3 - erp3p, YOL107W - hypothetical protein, EMP47 - emp47p, EMP24 - emp24p, ERV25 - erv25p, ERV14 - erv14p, YHL017W - hypothetical protein, ERP4 - erp4p, RET2 - ret2p, YIP3 - yip3p, GAS1 - gas1p, ERP2 - erp2p, SVP26 - svp26p, TCA17 - tca17p, ERP1 - erp1…
GO:0043228	non-membrane-bounded organelle	0.000127	0.00156	1.23	4095	890	997	267	[NSA2 - nsa2p, IDH1 - isocitrate dehydrogenase (nad(+)) idh1, LAS1 - las1p, RPS26B - ribosomal 40s subunit protein s26b, SLC1 - 1-acylglycerol-3-phosphate o-acyltransferase slc1, RPL23B - ribosomal 60s subunit protein l23b, PRT1 - prt1p, GPT2 - bifunctional glycerol-3-phosphate/glycerone-phosphate o-acyltransferase gpt2, RPS16A - ribosomal 40s subunit protein s16a, SBP1 - sbp1p, RPL37B - ribosoma…
GO:0043232	intracellular non-membrane-bounded organelle	0.000127	0.00154	1.23	4095	890	997	267	[NSA2 - nsa2p, IDH1 - isocitrate dehydrogenase (nad(+)) idh1, LAS1 - las1p, RPS26B - ribosomal 40s subunit protein s26b, SLC1 - 1-acylglycerol-3-phosphate o-acyltransferase slc1, RPL23B - ribosomal 60s subunit protein l23b, PRT1 - prt1p, GPT2 - bifunctional glycerol-3-phosphate/glycerone-phosphate o-acyltransferase gpt2, RPS16A - ribosomal 40s subunit protein s16a, SBP1 - sbp1p, RPL37B - ribosoma…
GO:0061576	acyl-CoA ceramide synthase complex	0.000142	0.0017	117	4095	2	35	2	[LAG1 - sphingosine n-acyltransferase lag1, LAC1 - sphingosine n-acyltransferase lac1]
GO:0005635	nuclear envelope	0.000178	0.00211	5.27	4095	58	134	10	[YNL181W - hypothetical protein, SNL1 - snl1p, GPI19 - gpi19p, PGA2 - pga2p, YMR134W - hypothetical protein, HMG1 - hydroxymethylglutaryl-coa reductase (nadph) hmg1, WBP1 - wbp1p, HMG2 - hydroxymethylglutaryl-coa reductase (nadph) hmg2, MMS21 - sumo ligase mms21, NVJ1 - nvj1p]
GO:0051233	spindle midzone	0.000189	0.00221	7.46	4095	9	366	6	[SLI15 - sli15p, KIP3 - tubulin-dependent atpase kip3, CBF2 - cbf2p, DAD2 - dad2p, BIM1 - bim1p, IPL1 - ipl1p]
GO:0044428	nuclear part	0.000225	0.0026	2.98	4095	963	20	14	[DSN1 - dsn1p, SPC25 - spc25p, MIF2 - mif2p, KRE28 - kre28p, HMG1 - hydroxymethylglutaryl-coa reductase (nadph) hmg1, WBP1 - wbp1p, HMG2 - hydroxymethylglutaryl-coa reductase (nadph) hmg2, BUB1 - bub1p, TID3 - tid3p, NUF2 - nuf2p, AME1 - ame1p, NSL1 - nsl1p, SPC105 - spc105p, LAC1 - sphingosine n-acyltransferase lac1]
GO:0070939	Dsl1/NZR complex	0.000226	0.00258	20.37	4095	3	201	3	[DSL1 - dsl1p, SEC39 - sec39p, TIP20 - tip20p]
GO:0005816	spindle pole body	0.00023	0.0026	14.54	4095	64	22	5	[NUF2 - nuf2p, KRE28 - kre28p, NKP2 - nkp2p, AME1 - ame1p, SPC105 - spc105p]
GO:0005815	microtubule organizing center	0.000302	0.00337	13.69	4095	68	22	5	[NUF2 - nuf2p, KRE28 - kre28p, NKP2 - nkp2p, AME1 - ame1p, SPC105 - spc105p]
GO:0008541	proteasome regulatory particle, lid subcomplex	0.000343	0.00379	4.15	4095	10	790	8	[RPN11 - proteasome regulatory particle lid subunit rpn11, RPN6 - proteasome regulatory particle lid subunit rpn6, RPN13 - proteasome regulatory particle lid subunit rpn13, SEM1 - proteasome regulatory particle lid subunit sem1, RPN12 - proteasome regulatory particle lid subunit rpn12, RPN8 - proteasome regulatory particle lid subunit rpn8, RPN9 - proteasome regulatory particle lid subunit rpn9, …
GO:0005774	vacuolar membrane	0.000353	0.00386	1.62	4095	206	737	60	[YPQ2 - ypq2p, PHS1 - phs1p, CTR2 - ctr2p, MNR2 - putative mg(2+) transporter mnr2, VOA1 - voa1p, YCK3 - yck3p, VMA4 - vma4p, SEC13 - sec13p, SNA2 - sna2p, YBR241C - hypothetical protein, TMS1 - tms1p, EMP70 - emp70p, VMA13 - vma13p, MYO2 - myosin 2, VPS60 - vps60p, EMP47 - emp47p, VMA10 - vma10p, SLM4 - slm4p, FET5 - fet5p, SNA3 - sna3p, FTH1 - fth1p, VTC4 - vtc4p, RCR2 - rcr2p, YCF1 - atp-bindi…
GO:0097038	perinuclear endoplasmic reticulum	0.000408	0.00442	69.41	4095	2	59	2	[DPL1 - sphinganine-1-phosphate aldolase dpl1, ICE2 - ice2p]
GO:0099023	tethering complex	0.000413	0.00442	2.32	4095	42	881	21	[RCY1 - rcy1p, COG8 - cog8p, TRS20 - trs20p, TRS31 - trs31p, PEP5 - pep5p, COG6 - cog6p, DSL1 - dsl1p, SEC39 - sec39p, COG3 - cog3p, VPS54 - vps54p, TIP20 - tip20p, SEC6 - sec6p, SEC8 - sec8p, TRS23 - trs23p, VPS8 - vps8p, EXO84 - exo84p, EXO70 - exo70p, TCA17 - tca17p, VPS52 - vps52p, COG5 - cog5p, COG1 - cog1p]
GO:0031617	NMS complex	0.000488	0.00517	2047.5	4095	1	2	1	[SPC105 - spc105p]
GO:0022625	cytosolic large ribosomal subunit	0.000515	0.0054	2.18	4095	72	677	26	[RPL24A - ribosomal 60s subunit protein l24a, RPP1B - ribosomal protein p1b, RPL21A - ribosomal 60s subunit protein l21a, RPL14A - ribosomal 60s subunit protein l14a, NMD3 - nmd3p, RPL36A - ribosomal 60s subunit protein l36a, RPL35B - ribosomal 60s subunit protein l35b, RPL23B - ribosomal 60s subunit protein l23b, RPL7A - ribosomal 60s subunit protein l7a, RPL37B - ribosomal 60s subunit protein l…
GO:0005793	endoplasmic reticulum-Golgi intermediate compartment	0.000573	0.00595	3.04	4095	15	987	11	[VPS64 - vps64p, ERP5 - erp5p, SEC21 - sec21p, EMP47 - emp47p, ERV25 - erv25p, EMP24 - emp24p, ERP4 - erp4p, ERP2 - erp2p, GLO3 - glo3p, ERP1 - erp1p, ERP3 - erp3p]
GO:0031975	envelope	0.000633	0.0065	4.56	4095	67	134	10	[YNL181W - hypothetical protein, SNL1 - snl1p, GPI19 - gpi19p, PGA2 - pga2p, YMR134W - hypothetical protein, HMG1 - hydroxymethylglutaryl-coa reductase (nadph) hmg1, WBP1 - wbp1p, HMG2 - hydroxymethylglutaryl-coa reductase (nadph) hmg2, MMS21 - sumo ligase mms21, NVJ1 - nvj1p]
GO:0031967	organelle envelope	0.000633	0.00644	4.56	4095	67	134	10	[YNL181W - hypothetical protein, SNL1 - snl1p, GPI19 - gpi19p, PGA2 - pga2p, YMR134W - hypothetical protein, HMG1 - hydroxymethylglutaryl-coa reductase (nadph) hmg1, WBP1 - wbp1p, HMG2 - hydroxymethylglutaryl-coa reductase (nadph) hmg2, MMS21 - sumo ligase mms21, NVJ1 - nvj1p]
GO:0008250	oligosaccharyltransferase complex	0.000684	0.00688	25.43	4095	7	69	3	[WBP1 - wbp1p, OST1 - ost1p, OST4 - ost4p]
GO:0005674	transcription factor TFIIF complex	0.000773	0.0077	50.56	4095	2	81	2	[TAF14 - taf14p, TFG1 - tfg1p]
GO:0046658	anchored component of plasma membrane	0.000822	0.00811	3.56	4095	13	797	9	[YLR194C - hypothetical protein, YPS1 - yps1p, GAS3 - gas3p, DFG5 - dfg5p, BAR1 - bar1p, DCW1 - dcw1p, GAS1 - gas1p, YPS3 - yps3p, GAS2 - gas2p]
